# Supplementary material
Source: HighWire-hosted journal article supplement (doi:10.1101/rna.062794.117)
Supplement: Supplemental_Table_S1.xlsx [file Supplemental_Table_S1.xlsx]

## Sheet: tachy_rrna_psis
site	rRNA_subunit.x	wt_noCMC.x_signal	wt_CMC.x_signal	mut_noCMC.x_signal	mut_CMC.x_signal	nt.x	pos.x	wt_noCMC_depth.x	wt_CMC_depth.x	mut_noCMC_depth.x	mut_CMC_depth.x	wt_noCMC_pen.x	wt_CMC_pen.x	mut_noCMC_pen.x	mut_CMC_pen.x	wt_pen_ratio.x	mut_pen_ratio.x	rRNA_subunit.y	wt_noCMC.y_signal	wt_CMC.y_signal	mut_noCMC.y_signal	mut_CMC.y_signal	nt.y	pos.y	wt_noCMC_depth.y	wt_CMC_depth.y	mut_noCMC_depth.y	mut_CMC_depth.y	wt_noCMC_pen.y	wt_CMC_pen.y	mut_noCMC_pen.y	mut_CMC_pen.y	wt_pen_ratio.y	mut_pen_ratio.y
ENST28:1849	ENST28	0	5	0	4	T	1849	9	12	24	64	0.1	0.461538	0.04	0.0769231	4.61538	1.92308	ENST28	727	6607	966	19893	T	1849	13845	21409	22326	69894	0.0525784	0.308641	0.0433108	0.284627	5.87011	6.57173
ENST28:3749	ENST28	0	30	13	14	T	3749	692	246	175	215	0.001443	0.125506	0.0795455	0.0694444	86.9757	0.873016	ENST28	731	4622	927	5677	T	3749	33376	37546	18383	48961	0.0219313	0.123126	0.0504787	0.115967	5.61416	2.29736
TGME49_05:73	TGME49_05	53	528	28	260	T	73	495	849	189	449	0.108871	0.622353	0.152632	0.58	5.71643	3.8	TGME49_05	2842	27957	1520	27347	T	73	31049	43127	22384	44632	0.091562	0.648256	0.0679473	0.61273	7.07997	9.01773
TGME49_18:35	TGME49_18	0	68	5	18	T	35	118	187	31	26	0.00840336	0.367021	0.1875	0.703704	43.6755	3.75309	TGME49_18	147	2067	278	4001	T	35	9632	7091	20883	17568	0.0153639	0.291596	0.0133595	0.227788	18.9794	17.0506
TGME49_18:119	TGME49_18	79	781	79	113	T	119	892	1465	268	308	0.0895857	0.533424	0.297398	0.368932	5.95435	1.24053	TGME49_18	11465	98237	9489	100415	T	119	182257	167463	109247	181343	0.0629108	0.586622	0.0868666	0.553732	9.32465	6.37451
TGME49_18:602	TGME49_18	28	161	28	74	T	602	284	309	78	156	0.101754	0.522581	0.367089	0.477707	5.13571	1.30134	TGME49_18	2272	26014	1143	27205	T	602	23496	39169	12621	44674	0.0967358	0.664156	0.0906354	0.608976	6.86567	6.71896
TGME49_18:883	TGME49_18	0	39	4	32	T	883	491	328	115	160	0.00203252	0.121581	0.0431034	0.204969	59.8176	4.75528	TGME49_18	473	1427	311	1661	T	883	26913	8544	11671	11345	0.0176117	0.167115	0.0267306	0.146483	9.4889	5.47998
TGME49_18:909	TGME49_18	53	291	41	104	T	909	751	644	97	275	0.0718085	0.452713	0.428571	0.380435	6.30445	0.887681	TGME49_18	1723	12265	870	11873	T	909	22380	21534	12642	26154	0.0770296	0.569584	0.0688919	0.453986	7.39436	6.58983
TGME49_18:1179	TGME49_18	0	127	11	33	T	1179	42	139	19	39	0.0232558	0.914286	0.6	0.85	39.3143	1.41667	TGME49_18	1638	8442	734	9640	T	1179	12784	11166	5738	12950	0.128197	0.756067	0.128071	0.744421	5.89769	5.81256
TGME49_18:1549	TGME49_18	53	79	2	18	T	1549	409	167	48	58	0.131707	0.47619	0.0612245	0.322034	3.61552	5.25989	TGME49_18	1032	6819	328	7208	T	1549	32696	20741	17693	22620	0.0315931	0.328801	0.0185939	0.318686	10.4074	17.1393
TGME49_18:1562	TGME49_18	36	97	5	43	T	1562	386	254	24	105	0.0956072	0.384314	0.24	0.415094	4.01971	1.72956	TGME49_18	1379	7403	370	8187	T	1562	14943	21809	7110	24544	0.0923448	0.339477	0.0521727	0.333591	3.67619	6.39398
TGME49_18:1628	TGME49_18	0	64	20	59	T	1628	320	330	132	218	0.00311526	0.196375	0.157895	0.273973	63.0362	1.73516	TGME49_18	4253	33723	1516	37727	T	1628	93533	67024	47173	76634	0.0454808	0.503156	0.0321575	0.492308	11.063	15.3092
TGME49_26:386	TGME49_26	0	31	2	18	T	386	249	209	35	92	0.004	0.152381	0.0833333	0.204301	38.0952	2.45161	TGME49_26	427	1571	366	2084	T	386	7470	7406	4265	8627	0.0572882	0.212232	0.0860291	0.241655	3.70463	2.80899
TGME49_26:673	TGME49_26	6	47	20	33	T	673	205	215	98	90	0.0339806	0.222222	0.212121	0.373626	6.53968	1.76138	TGME49_26	2865	2473	1329	2814	T	673	65350	15968	46892	20404	0.0438555	0.154925	0.0283624	0.137956	3.53263	4.86405
TGME49_26:954	TGME49_26	40	342	56	271	T	954	291	517	145	361	0.140411	0.662162	0.390411	0.751381	4.71589	1.92459	TGME49_26	3899	23817	1406	21898	T	954	32120	38939	16281	38428	0.121416	0.611659	0.0864144	0.569856	5.03772	6.59445
TGME49_26:1036	TGME49_26	3	86	8	22	T	1036	183	196	91	135	0.0217391	0.441624	0.0978261	0.169118	20.3147	1.72876	TGME49_26	964	5274	450	3319	T	1036	35959	16108	19836	13917	0.0268354	0.327457	0.0227353	0.23854	12.2024	10.4921
TGME49_26:1208	TGME49_26	46	430	12	135	T	1208	470	716	77	244	0.0997877	0.601116	0.166667	0.555102	6.02395	3.33061	TGME49_26	4238	26015	2398	29166	T	1208	53181	40201	29531	47820	0.0797074	0.647132	0.0812339	0.60992	8.11884	7.5082
TGME49_26:1210	TGME49_26	41	439	50	159	T	1210	464	1156	118	410	0.0903226	0.380294	0.428571	0.389294	4.2104	0.908354	TGME49_26	1615	13857	783	16154	T	1210	53275	59387	29435	70034	0.0303326	0.233347	0.0266341	0.23067	7.69294	8.66073
TGME49_26:1567	TGME49_26	72	660	21	177	T	1567	1199	1448	230	316	0.0608333	0.456177	0.0952381	0.561514	7.49879	5.8959	TGME49_26	519	7689	336	10031	T	1567	35784	27846	19629	35316	0.0145312	0.276152	0.0171676	0.284056	19.004	16.546
TGME49_26:1781	TGME49_26	17	147	25	76	T	1781	128	273	96	121	0.139535	0.540146	0.268041	0.631148	3.87105	2.35467	TGME49_26	877	6788	610	6097	T	1781	22629	19316	13548	17298	0.0387981	0.351452	0.0450956	0.352506	9.0585	7.81686
TGME49_26:2246	TGME49_26	7	97	0	36	T	2246	159	132	16	49	0.05	0.736842	0.0588235	0.74	14.7368	12.58	TGME49_26	1660	6905	590	6871	T	2246	15492	10982	9663	14311	0.10721	0.62879	0.0611548	0.480157	5.86505	7.85149
TGME49_26:2327	TGME49_26	23	96	29	40	T	2327	279	299	210	191	0.0857143	0.323333	0.14218	0.213542	3.77222	1.50191	TGME49_26	747	4260	542	3349	T	2327	21876	17227	11798	16171	0.0341912	0.24733	0.0460208	0.207148	7.23374	4.50118
TGME49_26:2378	TGME49_26	0	34	18	14	T	2378	665	271	184	182	0.0015015	0.128676	0.102703	0.0819672	85.6985	0.798102	TGME49_26	770	4612	939	5664	T	2378	33435	37497	18515	48473	0.023059	0.12302	0.0507669	0.116867	5.33501	2.30203
TGME49_26:2426	TGME49_26	6	35	0	19	T	2426	274	120	41	54	0.0254545	0.297521	0.0238095	0.363636	11.6883	15.2727	TGME49_26	441	1626	338	1235	T	2426	16532	6498	10869	5981	0.0267344	0.250346	0.0311868	0.20662	9.36419	6.62524
TGME49_26:2528	TGME49_26	41	219	11	138	T	2528	268	356	75	227	0.156134	0.616246	0.157895	0.609649	3.94691	3.86111	TGME49_26	2493	20257	977	17589	T	2528	21892	37783	10328	33529	0.113918	0.536153	0.0946849	0.524605	4.70649	5.54054
TGME49_26:2936	TGME49_26	1	63	6	23	T	2936	455	164	97	54	0.00438597	0.387879	0.0714286	0.436364	88.4364	6.10909	TGME49_26	3374	6589	1501	5406	T	2936	43848	20994	29432	20395	0.0769687	0.313884	0.0510312	0.265101	4.07808	5.19489
TGME49_26:2964	TGME49_26	14	73	5	49	T	2964	462	284	109	200	0.0323974	0.259649	0.0545455	0.248756	8.0145	4.56053	TGME49_26	5765	19538	2298	18647	T	2964	87320	63463	45072	65382	0.0660322	0.307875	0.0510061	0.285212	4.6625	5.59171
TGME49_26:2990	TGME49_26	0	23	9	35	T	2990	120	100	51	142	0.00826446	0.237624	0.192308	0.251748	28.7525	1.30909	TGME49_26	1477	6741	965	6446	T	2990	55150	50833	42796	57223	0.0267992	0.132628	0.0225717	0.112663	4.94895	4.99132
TGME49_26:3033	TGME49_26	41	202	16	171	T	3033	217	280	61	202	0.192661	0.72242	0.274194	0.847291	3.7497	3.09012	TGME49_26	3877	20731	1409	18712	T	3033	39826	43636	21433	39520	0.0973711	0.475101	0.0657833	0.473495	4.87928	7.1978
TGME49_26:3085	TGME49_26	85	517	57	134	T	3085	1360	1762	391	513	0.0631888	0.293817	0.147959	0.262646	4.64983	1.77512	TGME49_26	4584	19342	2209	20104	T	3085	70045	54515	51727	69517	0.065457	0.354813	0.0427235	0.289206	5.42056	6.76924

## Sheet: brady_rrna_psis
site	rRNA_subunit.x	wt_noCMC.x_signal	wt_CMC.x_signal	mut_noCMC.x_signal	mut_CMC.x_signal	nt.x	pos.x	wt_noCMC_depth.x	wt_CMC_depth.x	mut_noCMC_depth.x	mut_CMC_depth.x	wt_noCMC_pen.x	wt_CMC_pen.x	mut_noCMC_pen.x	mut_CMC_pen.x	wt_pen_ratio.x	mut_pen_ratio.x	rRNA_subunit.y	wt_noCMC.y_signal	wt_CMC.y_signal	mut_noCMC.y_signal	mut_CMC.y_signal	nt.y	pos.y	wt_noCMC_depth.y	wt_CMC_depth.y	mut_noCMC_depth.y	mut_CMC_depth.y	wt_noCMC_pen.y	wt_CMC_pen.y	mut_noCMC_pen.y	mut_CMC_pen.y	wt_pen_ratio.y	mut_pen_ratio.y
ENST12:299	ENST12	30	98	97	239	T	299	1073	613	1522	3590	0.0288641	0.161238	0.0643467	0.0668338	5.58611	1.03865	ENST12	281	1773	421	2096	T	299	6010	6712	5975	6874	0.046914	0.264263	0.0706158	0.305018	5.63293	4.3194
ENST18:34	ENST18	541	1349	601	27283	T	34	11253	5986	9506	60928	0.0481607	0.225489	0.0633218	0.4478	4.68201	7.07182	ENST18	584	4269	1077	4394	T	34	5806	5293	7284	6316	0.10074	0.806573	0.147975	0.695742	8.00645	4.70174
ENST18:105	ENST18	3492	2692	2996	59358	T	105	77409	14818	49006	172011	0.0451234	0.181726	0.0611545	0.345086	4.02732	5.64286	ENST18	4533	45288	7439	50641	T	105	71723	60934	84593	73215	0.0632145	0.743235	0.0879495	0.691679	11.7573	7.86451
ENST18:119	ENST18	10694	16802	8305	249661	T	119	149093	59122	102734	1327544	0.0717333	0.284204	0.0808488	0.188063	3.96196	2.32611	ENST18	4398	158038	10791	205317	T	119	122833	574778	138680	622165	0.0358126	0.274956	0.0778189	0.330005	7.67764	4.24068
ENST18:210	ENST18	1049	2598	1349	28528	T	210	20878	7759	17059	86883	0.0502898	0.334923	0.0791325	0.328357	6.65986	4.14946	ENST18	1681	29253	3648	34197	T	210	10175	36592	16794	41991	0.165291	0.799443	0.217267	0.814393	4.83658	3.74835
ENST18:218	ENST18	2868	9720	3349	81359	T	218	23606	19412	23614	181208	0.121532	0.500747	0.141859	0.448984	4.1203	3.165	ENST18	4015	167521	10284	244407	T	218	25821	268631	34709	340305	0.155526	0.623611	0.296312	0.718201	4.00969	2.4238
ENST18:681	ENST18	1112	3800	2180	36204	T	681	28620	10735	24578	78862	0.0388875	0.354042	0.0887343	0.459087	9.10427	5.17373	ENST18	3253	89550	5978	109532	T	681	44348	115898	41680	137083	0.0733726	0.772664	0.143447	0.799021	10.5307	5.57016
ENST18:822	ENST18	8112	21026	6848	283672	T	822	73929	46871	44893	665087	0.109739	0.448605	0.152559	0.426519	4.08793	2.79576	ENST18	9033	166954	19416	154764	T	822	67866	227771	93685	219247	0.133113	0.732992	0.207256	0.70589	5.50653	3.40588
ENST18:966	ENST18	1996	3333	1581	85851	T	966	38760	17874	28969	302331	0.0515209	0.186517	0.0546082	0.283966	3.62023	5.20006	ENST18	3426	96681	7913	89922	T	966	40150	117067	55774	114646	0.0853528	0.825862	0.141892	0.784347	9.67586	5.52779
ENST18:1004	ENST18	1161	2479	1132	52984	T	1004	30449	9112	22863	157549	0.0381609	0.272139	0.0495539	0.336306	7.13135	6.78667	ENST18	2897	32727	6299	22257	T	1004	45710	50601	49729	41516	0.0633983	0.646773	0.126684	0.536118	10.2017	4.23193
ENST18:1045	ENST18	2301	5097	2280	69647	T	1045	36182	14655	28260	162542	0.063621	0.347844	0.0807119	0.42849	5.46743	5.30888	ENST18	10102	56194	15977	73406	T	1045	75758	66177	97566	86074	0.133357	0.849149	0.163764	0.852826	6.36748	5.20764
ENST18:1174	ENST18	990	1120	692	16763	T	1174	38218	8710	21825	113223	0.0259295	0.128688	0.0317511	0.14806	4.96299	4.66316	ENST18	511	8556	1152	7980	T	1174	26777	21799	31721	21433	0.0191202	0.392523	0.036347	0.372352	20.5293	10.2444
ENST18:1177	ENST18	3937	6837	2049	144160	T	1177	44548	17487	24822	296260	0.088397	0.391011	0.0825847	0.486601	4.42335	5.89215	ENST18	3316	96600	7503	79488	T	1177	28871	126397	36637	109963	0.114886	0.764261	0.204815	0.722864	6.65232	3.52936
ENST18:1367	ENST18	8136	13424	5776	227935	T	1367	56084	24756	42481	365094	0.145083	0.542271	0.135987	0.62432	3.73765	4.59102	ENST18	13103	272300	25145	287001	T	1367	69303	362964	94226	416298	0.18908	0.750213	0.266866	0.689413	3.9677	2.58337
ENST18:1693	ENST18	3300	5517	4115	106895	T	1693	40785	15469	49272	252992	0.0809346	0.35669	0.0835346	0.422526	4.40714	5.05809	ENST18	4306	57723	7975	38289	T	1693	62982	119097	87375	120035	0.0683835	0.484676	0.0912836	0.318988	7.08762	3.49447
ENST28:1664	ENST28	2062	3544	2657	49319	T	1664	48680	18650	39260	286398	0.0423779	0.19007	0.0677008	0.172207	4.48512	2.54365	ENST28	3374	107191	7174	136882	T	1664	36099	134013	46857	182200	0.0934903	0.799857	0.153122	0.751275	8.5555	4.90637
ENST28:1847	ENST28	6704	10464	4626	150329	T	1847	50408	18283	36060	224197	0.133012	0.572358	0.12831	0.670523	4.30306	5.22579	ENST28	1891	77447	5621	109678	T	1847	37728	155384	46308	171490	0.0501471	0.498426	0.121402	0.639561	9.93929	5.26813
ENST28:1849	ENST28	2973	7508	2775	121870	T	1849	51408	27605	37396	394743	0.0578498	0.272006	0.0742306	0.308734	4.70194	4.15913	ENST28	5587	192869	12282	181801	T	1849	42344	356285	57110	362784	0.131964	0.541335	0.215072	0.501129	4.10215	2.33005
ENST28:2495	ENST28	1432	3996	1083	38567	T	2495	62189	20359	34241	165163	0.0230423	0.196316	0.031657	0.233513	8.51983	7.37635	ENST28	1418	36200	3285	30886	T	2495	14164	53476	21795	55545	0.100176	0.676945	0.150762	0.556062	6.75753	3.68835
ENST28:3616	ENST28	2901	2793	1898	44340	T	3616	30203	7351	19851	83410	0.09608	0.380033	0.0956579	0.531597	3.95538	5.55727	ENST28	2511	25136	4270	26211	T	3616	16340	30573	20610	33520	0.153724	0.822169	0.207219	0.781958	5.34835	3.77357
ENST28:3618	ENST28	5664	12983	2574	168549	T	3618	38106	21849	23359	274634	0.14866	0.594233	0.110231	0.613724	3.99726	5.56761	ENST28	2379	44946	7072	54362	T	3618	21017	98986	31186	105871	0.113236	0.45407	0.226793	0.513479	4.00993	2.26408
ENST28:3899	ENST28	2174	3456	1760	62235	T	3899	29047	11288	18507	160628	0.0748761	0.306227	0.095148	0.387452	4.08979	4.07209	ENST28	1449	67458	4174	54454	T	3899	24538	92206	38253	73826	0.0590896	0.731604	0.109139	0.737603	12.3813	6.75838
ENST28:3938	ENST28	2850	3881	1839	43741	T	3938	30562	9438	15757	96259	0.0932827	0.411272	0.116766	0.454415	4.40888	3.89167	ENST28	3238	17421	3720	23466	T	3938	20686	29250	23945	38396	0.156572	0.595604	0.155391	0.611168	3.80403	3.93309
ENST28:4263	ENST28	1824	1808	1835	76784	T	4263	34351	7552	26993	143368	0.0531265	0.239507	0.0680151	0.535576	4.50825	7.87437	ENST28	1598	19121	3425	26316	T	4263	36090	25040	50189	34855	0.0443047	0.763628	0.0682606	0.755021	17.2358	11.0609
ENST28:4323	ENST28	1904	2918	679	45830	T	4323	63105	11090	42060	139190	0.0301873	0.263186	0.016167	0.329267	8.71845	20.3666	ENST28	748	5931	2220	8176	T	4323	43409	19611	39425	24015	0.0172541	0.302468	0.0563334	0.340481	17.5302	6.04404
ENST28:4546	ENST28	5655	5383	4702	147797	T	4546	93619	20492	69611	327736	0.0604144	0.262724	0.0675602	0.450965	4.34869	6.67501	ENST28	4123	79171	8229	80647	T	4546	125688	146241	111049	141073	0.0328111	0.541377	0.0741108	0.571672	16.4998	7.71375
ENST28:4549	ENST28	4327	5474	3854	127614	T	4549	95396	26956	71226	495347	0.0453683	0.203101	0.0541227	0.257627	4.47672	4.76005	ENST28	3934	141628	9064	134547	T	4549	122472	281930	110805	274485	0.0321295	0.502353	0.0818096	0.490182	15.6353	5.99173
ENST28:4598	ENST28	5316	8146	3399	125905	T	4598	111126	22806	68945	316277	0.0478462	0.357215	0.049314	0.398086	7.46591	8.07249	ENST28	4443	82511	8146	79672	T	4598	83170	122478	73791	120979	0.0534321	0.673683	0.110405	0.658563	12.6082	5.96498
ENST28:4643	ENST28	1190	1562	1159	31573	T	4643	38041	12319	30108	174234	0.0313075	0.126867	0.0385267	0.181215	4.05228	4.70362	ENST28	3288	75501	6578	89342	T	4643	51988	101728	54002	124008	0.0632634	0.742188	0.121827	0.720456	11.7317	5.91378
ENST28:4937	ENST28	6793	13872	6068	183406	T	4937	86100	27364	66244	377650	0.0789073	0.506961	0.0916145	0.485652	6.42477	5.30104	ENST28	6824	75643	11289	108620	T	4937	40877	85340	39881	122564	0.16696	0.886373	0.283085	0.886232	5.30889	3.13062
ENST58:68	ENST58	498	1476	869	33188	T	68	16734	10217	18286	163238	0.0298177	0.144549	0.0475748	0.203315	4.84775	4.2736	ENST58	1912	45502	3837	36587	T	68	15946	74850	21918	66785	0.11996	0.607914	0.175099	0.547839	5.06765	3.12874
TGME49_18:35	TGME49_18	200	373	214	15153	T	35	5941	2900	4578	48436	0.033827	0.128921	0.0469535	0.31286	3.81119	6.66319	TGME49_18	423	9416	686	7308	T	35	4354	14407	4649	13130	0.0973594	0.653595	0.147742	0.556622	6.71322	3.76753
TGME49_18:119	TGME49_18	7480	9058	3540	277534	T	119	85329	22425	46632	504202	0.0876714	0.403951	0.0759334	0.550443	4.60756	7.24903	TGME49_18	4796	92194	7616	104790	T	119	82090	148563	61973	153379	0.0584352	0.620574	0.122906	0.683212	10.6199	5.5588
TGME49_18:207	TGME49_18	3036	8462	2602	131380	T	207	23663	16873	20051	258969	0.128338	0.501541	0.129812	0.507321	3.90796	3.90811	TGME49_18	10950	262384	15477	237030	T	207	45377	308966	47459	275966	0.241328	0.849233	0.326127	0.858911	3.51899	2.63367
TGME49_18:303	TGME49_18	4110	7719	3522	150431	T	303	27771	14121	25262	232338	0.148027	0.546665	0.139453	0.647468	3.69301	4.64291	TGME49_18	4933	149624	8752	145960	T	303	60920	200549	45101	183543	0.0809901	0.746073	0.194071	0.795237	9.2119	4.09766
TGME49_18:602	TGME49_18	2482	3491	1254	61431	T	602	20132	7263	13224	120156	0.12333	0.480727	0.094896	0.511264	3.8979	5.38763	TGME49_18	4283	45789	5622	37189	T	602	39019	70200	39260	56269	0.10979	0.65227	0.143221	0.660921	5.94108	4.61469
TGME49_18:909	TGME49_18	1248	1737	867	50161	T	909	12647	4766	8089	91613	0.0987508	0.36459	0.107293	0.547536	3.69202	5.10319	TGME49_18	2474	84033	4487	52062	T	909	37840	115640	36899	74761	0.0654052	0.72668	0.121626	0.696383	11.1104	5.72561
TGME49_18:1087	TGME49_18	596	1362	384	21979	T	1087	21539	6897	13002	79613	0.0277159	0.197594	0.0296086	0.276082	7.12925	9.3244	TGME49_18	1771	22597	2936	15746	T	1087	29629	43573	26008	33779	0.0598043	0.518612	0.112922	0.466163	8.67183	4.12817
TGME49_18:1308	TGME49_18	3647	5554	2600	101641	T	1308	23889	10053	17697	180464	0.1527	0.552516	0.146966	0.563223	3.61832	3.83234	TGME49_18	8852	180237	12904	125425	T	1308	44515	228956	47928	176342	0.198872	0.787213	0.269252	0.711262	3.95839	2.64162
TGME49_18:1549	TGME49_18	707	794	489	19863	T	1549	22441	3886	12745	61063	0.031548	0.204528	0.0384434	0.325298	6.48307	8.46173	TGME49_18	2555	27897	3109	17767	T	1549	18214	34971	16213	22102	0.140324	0.797724	0.19181	0.803873	5.68488	4.19099
TGME49_18:1562	TGME49_18	748	1067	684	19955	T	1562	9955	3836	5902	62519	0.075231	0.278342	0.116043	0.319194	3.69984	2.75066	TGME49_18	1514	45848	2498	24341	T	1562	37731	90682	25118	52954	0.0401516	0.505596	0.0994864	0.459673	12.5922	4.62046
TGME49_18:1628	TGME49_18	2205	3757	2222	53774	T	1628	25860	10173	34987	126482	0.0853022	0.369373	0.0635361	0.425156	4.33017	6.69157	TGME49_18	4497	44952	5876	19563	T	1628	61695	83007	52164	57162	0.0729059	0.54155	0.112662	0.342249	7.42808	3.03785
TGME49_26:196	TGME49_26	233	477	99	6100	T	196	10762	3528	6483	43877	0.0217412	0.135449	0.0154226	0.139045	6.23008	9.01565	TGME49_26	211	3980	532	3102	T	196	15473	14010	13686	11840	0.0137004	0.284134	0.0389421	0.262056	20.7391	6.72937
TGME49_26:387	TGME49_26	672	1375	242	29862	T	387	9684	3410	3118	65852	0.0694889	0.403401	0.0779096	0.45348	5.80525	5.82059	TGME49_26	748	15793	2939	21377	T	387	9424	21281	17393	27161	0.0794695	0.742129	0.169024	0.787055	9.33855	4.65648
TGME49_26:1036	TGME49_26	475	473	494	10739	T	1036	15828	2578	12204	40180	0.0300714	0.183792	0.0405571	0.267291	6.11186	6.59047	TGME49_26	2479	7454	2693	4681	T	1036	37745	15944	25907	11860	0.0657023	0.467545	0.103983	0.394739	7.11611	3.79618
TGME49_26:1075	TGME49_26	573	492	454	6521	T	1075	10802	2489	6216	44502	0.0531334	0.197992	0.0731864	0.146552	3.72632	2.00245	TGME49_26	3249	14356	3922	9465	T	1075	26995	26811	26141	17107	0.120388	0.535469	0.150065	0.553308	4.44785	3.68712
TGME49_26:1208	TGME49_26	2946	4273	1688	69317	T	1208	25197	8286	16685	106294	0.116954	0.515748	0.101223	0.652129	4.40984	6.44252	TGME49_26	1888	45265	3434	44826	T	1208	61249	89205	33193	69143	0.0308408	0.507432	0.103483	0.648314	16.4533	6.26496
TGME49_26:1210	TGME49_26	1143	2784	819	39654	T	1210	25540	11611	16751	161137	0.0447907	0.239838	0.0489494	0.246093	5.35464	5.02751	TGME49_26	2569	66578	4695	45431	T	1210	61582	159313	36070	118188	0.0417323	0.417911	0.130188	0.384401	10.0141	2.95267
TGME49_26:1567	TGME49_26	905	1716	326	39479	T	1567	22295	5947	11565	107132	0.0406351	0.288668	0.0282725	0.368514	7.10392	13.0343	TGME49_26	923	17961	2758	19213	T	1567	55061	43713	36039	36746	0.0167811	0.410898	0.0765538	0.522873	24.4858	6.83013
TGME49_26:1781	TGME49_26	779	886	616	10688	T	1781	10595	2776	8791	32541	0.0736127	0.319409	0.0701774	0.328468	4.33905	4.68053	TGME49_26	1530	35611	2141	23427	T	1781	19066	50977	18309	37397	0.0802958	0.698576	0.116985	0.626451	8.70003	5.35495
TGME49_26:2246	TGME49_26	1087	985	777	20429	T	2246	14929	3321	10612	40477	0.0728734	0.296809	0.0733063	0.504719	4.07294	6.88506	TGME49_26	2970	29864	3942	18625	T	2246	17919	34476	19462	23266	0.165792	0.86623	0.20259	0.800533	5.22478	3.9515
TGME49_26:2248	TGME49_26	2289	4036	858	61108	T	2248	17845	7728	11832	110103	0.12832	0.522319	0.0725936	0.555012	4.07044	7.64546	TGME49_26	2214	33653	5058	31214	T	2248	23253	93469	27675	65343	0.0952524	0.360051	0.182794	0.477703	3.77997	2.61334
TGME49_26:2366	TGME49_26	2385	1353	2291	20276	T	2366	97647	8631	58948	68283	0.0244347	0.156858	0.0388811	0.296951	6.41948	7.63742	TGME49_26	5994	11169	6554	6438	T	2366	31047	14374	31671	9278	0.193088	0.777043	0.206965	0.693933	4.02429	3.3529
TGME49_26:2426	TGME49_26	230	189	329	2104	T	2426	6967	1262	6359	9339	0.0331516	0.150435	0.0518868	0.225375	4.53781	4.34359	TGME49_26	552	2364	838	1016	T	2426	18778	7191	19779	3832	0.0294478	0.328838	0.0424166	0.265327	11.1668	6.25528
TGME49_26:2528	TGME49_26	1425	1987	1106	32119	T	2528	14378	5287	10129	75019	0.0991724	0.375946	0.109279	0.428152	3.79083	3.91796	TGME49_26	771	44104	1565	25820	T	2528	18710	60941	24969	35518	0.0412592	0.723721	0.0627153	0.726963	17.5409	11.5915
TGME49_26:2833	TGME49_26	423	490	323	9886	T	2833	12168	3540	7882	56887	0.0348426	0.138661	0.0411011	0.173798	3.97965	4.22854	TGME49_26	1672	11328	2073	6470	T	2833	29036	45030	33542	36216	0.0576161	0.251582	0.0618311	0.178673	4.36652	2.8897
TGME49_26:3085	TGME49_26	2565	2596	2054	46945	T	3085	71328	15999	76649	241039	0.0359741	0.162312	0.0268102	0.194764	4.51192	7.26457	TGME49_26	5478	84255	5259	48447	T	3085	353701	216187	507238	196369	0.0154904	0.389735	0.0103699	0.246718	25.1597	23.7918

## Sheet: uninf_rrna_psis
site	rRNA_subunit.x	wt_noCMC.x_signal	wt_CMC.x_signal	mut_noCMC.x_signal	mut_CMC.x_signal	nt.x	pos.x	wt_noCMC_depth.x	wt_CMC_depth.x	mut_noCMC_depth.x	mut_CMC_depth.x	wt_noCMC_pen.x	wt_CMC_pen.x	mut_noCMC_pen.x	mut_CMC_pen.x	wt_pen_ratio.x	mut_pen_ratio.x	rRNA_subunit.y	wt_noCMC.y_signal	wt_CMC.y_signal	mut_noCMC.y_signal	mut_CMC.y_signal	nt.y	pos.y	wt_noCMC_depth.y	wt_CMC_depth.y	mut_noCMC_depth.y	mut_CMC_depth.y	wt_noCMC_pen.y	wt_CMC_pen.y	mut_noCMC_pen.y	mut_CMC_pen.y	wt_pen_ratio.y	mut_pen_ratio.y
560	ENST12	249	1995	271	5651	T	560	6420	3803	5240	9993	0.0389347	0.524711	0.0518985	0.565539	13.4767	10.897	ENST12	712	8766	902	5751	T	560	6245	16365	7661	9808	0.114153	0.535684	0.117854	0.5864	4.69268	4.97564
610	ENST12	689	1604	631	5335	T	610	6735	3627	5474	10773	0.102435	0.442393	0.115434	0.495266	4.31878	4.29048	ENST12	1025	6565	1046	5388	T	610	10989	18653	9490	13057	0.0933576	0.351989	0.110315	0.412697	3.77033	3.74108
1004	ENST18	3012	16999	2543	54663	T	1004	91943	22840	60163	72063	0.0327699	0.744276	0.0422844	0.758548	22.7121	17.9392	ENST18	8536	54997	9406	30728	T	1004	88069	86021	107703	48323	0.0969343	0.639348	0.0873412	0.635895	6.59569	7.28058
1045	ENST18	6052	24724	5988	71911	T	1045	129181	29956	89173	87174	0.0468564	0.82535	0.0671608	0.824915	17.6145	12.2827	ENST18	33969	131676	25930	84218	T	1045	185315	158952	189939	99218	0.183309	0.828402	0.136522	0.848819	4.51917	6.21745
1046	ENST18	2272	8930	1764	30792	T	1046	114766	38119	80852	115992	0.0198053	0.234286	0.0218297	0.265473	11.8295	12.1611	ENST18	4204	43917	4616	26954	T	1046	184392	200692	186403	124918	0.0228046	0.218832	0.0247688	0.21578	9.59597	8.71177
105	ENST18	4163	6699	4042	29731	T	105	95173	9598	65404	41016	0.0437514	0.697989	0.0618148	0.72487	15.9535	11.7265	ENST18	15676	87631	9527	52081	T	105	186248	129636	132825	74675	0.0841723	0.67598	0.0717329	0.69744	8.03091	9.72272
1056	ENST18	4950	56292	5484	156076	T	1056	88024	105290	70011	304867	0.0562454	0.534642	0.0783437	0.511949	9.50553	6.53466	ENST18	20394	265700	18959	161045	T	1056	211980	501819	184184	307147	0.0962115	0.529475	0.10294	0.524327	5.50324	5.09352
1081	ENST18	3981	68169	4730	140977	T	1081	141127	235056	110404	564359	0.0282155	0.290015	0.0428513	0.249802	10.2786	5.82949	ENST18	41164	588363	28606	386763	T	1081	303740	953712	231044	575614	0.135527	0.616919	0.123816	0.671914	4.55202	5.42673
109	ENST18	9641	12992	7577	46839	T	109	108925	41082	80396	165981	0.0885188	0.316262	0.0942572	0.282199	3.57282	2.99393	ENST18	22552	232293	13931	142943	T	109	211457	425047	146326	244498	0.106655	0.546512	0.0952114	0.58464	5.12413	6.14045
1136	ENST18	2600	13816	2310	33103	T	1136	67808	35670	49222	84229	0.0383577	0.387345	0.0469496	0.393019	10.0982	8.37109	ENST18	15263	61951	8366	39835	T	1136	167502	160600	101593	101520	0.0911267	0.385751	0.0823572	0.392392	4.23313	4.76451
1174	ENST18	658	1499	569	4250	T	1174	33537	8682	25557	27480	0.0196494	0.172751	0.0223022	0.154689	8.79171	6.93602	ENST18	1831	14839	1293	8377	T	1174	62751	40842	31836	20550	0.0291943	0.363343	0.0406445	0.407669	12.4457	10.0301
1177	ENST18	2830	46735	3618	136610	T	1177	35210	61838	28425	185519	0.080401	0.755769	0.127313	0.736368	9.39999	5.78392	ENST18	11216	170113	8438	90520	T	1177	69984	223214	37366	117117	0.160277	0.762108	0.225841	0.772904	4.75494	3.42234
1232	ENST18	619	280	493	1098	T	1232	17398	1425	13312	4576	0.0356342	0.197055	0.0371066	0.240114	5.52993	6.47092	ENST18	162	555	151	178	T	1232	7508	1898	3107	997	0.0217073	0.292786	0.048906	0.179359	13.4879	3.66741
1238	ENST18	5427	9992	4718	32281	T	1238	23632	11277	18077	36951	0.229679	0.886061	0.261036	0.87362	3.85783	3.34675	ENST18	874	9158	980	3099	T	1238	5465	10752	3952	3781	0.16008	0.851762	0.248166	0.819672	5.32084	3.30292
1244	ENST18	854	4375	899	16692	T	1244	31700	17268	23218	59086	0.0269708	0.253402	0.0387614	0.282516	9.39544	7.28859	ENST18	342	4887	418	1867	T	1244	5256	17787	5868	6196	0.0652463	0.274792	0.0713921	0.301436	4.21161	4.22226
1315	ENST18	6584	26105	4954	65328	T	1315	142014	53276	95504	128458	0.0463683	0.490005	0.0518821	0.508559	10.5677	9.80221	ENST18	10127	56889	8625	33945	T	1315	224383	146735	161621	78113	0.0451369	0.387703	0.0533714	0.43457	8.58949	8.14237
1346	ENST18	2514	2198	1690	9016	T	1346	88405	9264	55135	28872	0.0284483	0.237345	0.0306696	0.312299	8.34303	10.1827	ENST18	5680	8544	4427	3548	T	1346	123597	51706	103896	26819	0.0459635	0.165258	0.0426191	0.132327	3.59542	3.10486
1347	ENST18	1640	2183	987	7208	T	1347	88054	11207	55005	35475	0.0186361	0.194861	0.0179617	0.203208	10.4561	11.3134	ENST18	3169	26107	2803	14586	T	1347	125323	77203	104991	41035	0.0252944	0.338169	0.0267068	0.355468	13.3693	13.31
1367	ENST18	12607	127074	12955	324067	T	1367	83047	147744	57602	392198	0.151816	0.860097	0.224919	0.826285	5.6654	3.6737	ENST18	40731	572109	35785	324359	T	1367	219721	773832	149566	437348	0.18538	0.73932	0.239264	0.74165	3.98814	3.09972
1445	ENST18	6736	81370	7367	208263	T	1445	76159	97898	59280	254212	0.0884585	0.831173	0.124289	0.81925	9.39619	6.59147	ENST18	16710	275162	17473	159506	T	1445	139520	351485	117551	206357	0.119774	0.782856	0.148649	0.772963	6.53611	5.19991
1692	ENST18	3713	11991	3386	40075	T	1692	67027	25405	62355	77940	0.0554097	0.472014	0.0543171	0.514184	8.51863	9.46633	ENST18	7569	13898	5462	7779	T	1692	219486	110004	113480	66873	0.0344895	0.126349	0.0481402	0.116338	3.6634	2.41665
1693	ENST18	5310	45500	5694	144395	T	1693	68354	70202	64174	220470	0.0776973	0.648135	0.0887417	0.654943	8.34179	7.38033	ENST18	14375	90352	10851	42928	T	1693	225140	196723	119234	107580	0.0638533	0.459288	0.0910135	0.399039	7.19286	4.38439
210	ENST18	2594	11684	1947	31828	T	210	30950	16912	20515	48131	0.0838422	0.690889	0.0949503	0.661286	8.24034	6.96455	ENST18	8748	88442	8566	60171	T	210	41548	105916	33360	70388	0.210571	0.835022	0.256797	0.854849	3.96552	3.32889
296	ENST18	9152	47865	7642	86665	T	296	58059	70038	45102	133880	0.157647	0.683419	0.169457	0.647336	4.33512	3.82007	ENST18	11052	106601	11392	53228	T	296	146265	236782	115132	136675	0.0755678	0.45021	0.0989551	0.389454	5.95769	3.93566
34	ENST18	727	376	479	2072	T	34	67473	978	40659	3673	0.0107893	0.385087	0.0118052	0.564235	35.6914	47.7954	ENST18	3028	13225	4236	7325	T	34	26779	18841	84488	10192	0.113107	0.701942	0.0501485	0.718729	6.20601	14.332
36	ENST18	3898	945	1791	4427	T	36	72334	2099	42993	8927	0.053902	0.450476	0.0416802	0.495968	8.35732	11.8994	ENST18	3612	20569	6383	11108	T	36	34690	41056	91264	22122	0.104148	0.501011	0.0699501	0.502147	4.81056	7.17864
609	ENST18	758	2929	490	7188	T	609	60407	19991	40018	40741	0.0125646	0.146559	0.0122692	0.176452	11.6644	14.3817	ENST18	1891	11889	1257	6326	T	609	89868	48972	58040	23892	0.0210529	0.242787	0.0216743	0.264806	11.5322	12.2175
651	ENST18	6157	29581	3711	48643	T	651	66217	83664	41779	176887	0.0929959	0.353577	0.0888463	0.274999	3.80207	3.09522	ENST18	12103	70450	11223	47808	T	651	105619	165820	71264	103829	0.1146	0.424862	0.157497	0.460455	3.70736	2.92358
681	ENST18	2326	46870	2947	99989	T	681	69224	70936	45226	159593	0.033615	0.660741	0.0651823	0.626527	19.6561	9.61192	ENST18	17930	303115	17226	172310	T	681	100474	374270	104572	210047	0.178462	0.809884	0.164737	0.820341	4.53812	4.97971
686	ENST18	2576	72451	3822	153902	T	686	73718	177353	53257	393933	0.0349571	0.408516	0.0717826	0.390682	11.6862	5.44257	ENST18	19833	413741	16498	242619	T	686	148396	839986	132088	474274	0.133655	0.492558	0.124908	0.51156	3.68529	4.09549
815	ENST18	3169	25136	2260	48215	T	815	63242	62258	38825	124805	0.0501241	0.403749	0.0582342	0.386328	8.05498	6.63404	ENST18	7237	30715	5838	15948	T	815	94580	101643	67095	50975	0.076527	0.302192	0.0870246	0.312873	3.94883	3.59522
822	ENST18	10769	159288	11890	282526	T	822	81611	227815	56480	420448	0.131966	0.6992	0.210531	0.671965	5.29834	3.19176	ENST18	25372	256085	20671	140010	T	822	133657	368455	98622	196285	0.189835	0.695025	0.209606	0.713301	3.6612	3.40305
863	ENST18	1181	4286	808	7647	T	863	52236	13550	29058	24940	0.0226276	0.31636	0.0278399	0.306644	13.9812	11.0145	ENST18	3891	29200	3409	17344	T	863	42361	47338	40636	26029	0.0918748	0.616849	0.0839137	0.666347	6.71401	7.94086
866	ENST18	262	3676	240	9509	T	866	52989	20369	29798	43104	0.0049632	0.180511	0.00808752	0.220624	36.3698	27.2796	ENST18	1869	22614	1460	13298	T	866	48714	74295	44605	41465	0.0383865	0.304391	0.0327534	0.320721	7.92962	9.79197
93	ENST18	1409	242	822	1251	T	93	67464	1322	39531	4974	0.0208997	0.183673	0.0208186	0.251658	8.78832	12.0882	ENST18	1763	6307	2167	3530	T	93	127106	22398	100584	11822	0.0138781	0.28162	0.0215539	0.298655	20.2924	13.8562
966	ENST18	4764	38616	4746	121037	T	966	82957	49163	55177	155481	0.0574387	0.785473	0.0860307	0.77847	13.675	9.04874	ENST18	15403	157936	11776	96442	T	966	106967	197250	88672	117942	0.144006	0.80069	0.132814	0.817709	5.56013	6.1568
1395	ENST26	262	408	237	1206	T	1395	8188	1625	5738	5114	0.0321163	0.251538	0.0414706	0.235973	7.83209	5.69011	ENST26	527	2515	443	1199	T	1395	17880	13218	12868	7825	0.0295286	0.190332	0.0345015	0.153335	6.4457	4.4443
1523	ENST28	5997	113874	7077	167887	T	1523	109569	136115	72742	205874	0.0547413	0.836603	0.0973015	0.815485	15.2829	8.38102	ENST28	26707	216964	16323	110779	T	1523	175432	264752	109309	133123	0.15224	0.8195	0.149337	0.832156	5.38293	5.57235
1569	ENST28	2909	70236	4022	139347	T	1569	66469	94314	42849	189627	0.0437791	0.744707	0.0938856	0.734849	17.0105	7.82707	ENST28	8015	153387	7547	65431	T	1569	71938	201221	52420	85598	0.111428	0.762282	0.143988	0.764401	6.84105	5.30878
1664	ENST28	3085	30137	3272	70100	T	1664	71170	42862	47052	100827	0.0433604	0.703124	0.0695599	0.695253	16.2158	9.99504	ENST28	14176	161169	9230	85941	T	1664	124751	208214	75360	110238	0.113641	0.774056	0.12249	0.779597	6.81138	6.36456
1670	ENST28	3831	46609	4202	115709	T	1670	75119	92396	51735	223716	0.0510117	0.504454	0.0812394	0.517216	9.88898	6.36657	ENST28	20138	188715	11090	97774	T	1670	154485	408936	90486	213345	0.130361	0.461479	0.12257	0.458293	3.54	3.73903
1731	ENST28	1003	6225	895	13120	T	1731	51600	16827	29095	38463	0.019457	0.369979	0.0307946	0.341124	19.0152	11.0774	ENST28	2019	7804	1886	3479	T	1731	68687	38429	49205	18800	0.0294083	0.203097	0.038349	0.185097	6.90609	4.82663
1766	ENST28	754	2373	447	5834	T	1766	56760	5817	29647	12634	0.0133014	0.408044	0.0151106	0.461812	30.6768	30.5621	ENST28	3138	9979	2840	4754	T	1766	79882	23880	55645	10597	0.039295	0.417905	0.0510549	0.44867	10.6351	8.78799
1768	ENST28	2297	14414	1481	29450	T	1768	57985	20846	30627	44904	0.0396303	0.691466	0.0483871	0.655851	17.4479	13.5543	ENST28	8052	44473	6483	19888	T	1768	88344	68571	62322	30201	0.091154	0.648574	0.104039	0.658533	7.11514	6.32969
1769	ENST28	1902	9642	1380	19939	T	1769	58527	30424	31282	64743	0.0325144	0.316943	0.0441454	0.307982	9.7478	6.97654	ENST28	3008	27526	2735	12542	T	1769	90970	95928	64563	42669	0.0330765	0.286952	0.0423766	0.293954	8.6754	6.9367
1847	ENST28	2464	13843	1977	17799	T	1847	85136	84049	52973	176064	0.0289533	0.164711	0.0373391	0.101099	5.68886	2.70759	ENST28	11394	158294	8358	97912	T	1847	95367	309189	80128	155905	0.119485	0.511967	0.104319	0.628026	4.2848	6.02023
2495	ENST28	3106	22221	2602	53468	T	2495	45274	33841	29742	82125	0.0686251	0.65664	0.0875164	0.651061	9.56851	7.4393	ENST28	3274	74626	3820	34806	T	2495	40478	109194	33595	54307	0.0809061	0.683429	0.113734	0.640918	8.44718	5.63525
2826	ENST28	4127	12581	2696	33108	T	2826	43679	18992	23746	49304	0.0945055	0.662455	0.113572	0.671514	7.00969	5.91266	ENST28	4405	30949	3001	15948	T	2826	63435	64999	37268	34774	0.0694558	0.476154	0.0805495	0.458634	6.85549	5.69382
3562	ENST28	989	793	619	951	T	3562	14607	3231	9215	4002	0.0677711	0.245668	0.0672743	0.237822	3.62497	3.5351	ENST28	379	1100	251	590	T	3562	11934	6359	7717	3417	0.0318391	0.173113	0.0326509	0.172908	5.43712	5.29565
3616	ENST28	2919	10035	1715	17675	T	3616	41716	12502	20931	22087	0.0699954	0.802687	0.0819797	0.800254	11.4677	9.7616	ENST28	7894	47117	6991	22536	T	3616	44788	56903	42719	27138	0.176271	0.828026	0.16367	0.830429	4.69746	5.07379
3618	ENST28	2044	30005	1673	32381	T	3618	43685	96560	24429	143412	0.0468113	0.310747	0.0685223	0.225795	6.63828	3.29521	ENST28	7521	83924	6497	42307	T	3618	57914	182472	52491	82524	0.12988	0.459931	0.12379	0.512669	3.5412	4.14143
3674	ENST28	2999	12620	1861	25842	T	3674	66612	19554	33848	38852	0.0450363	0.64541	0.055009	0.665148	14.3309	12.0916	ENST28	3704	16061	3470	7981	T	3674	50412	26977	46110	12376	0.0734929	0.595374	0.0752749	0.644906	8.1011	8.56735
3709	ENST28	6424	8993	2921	15372	T	3709	68956	21026	34018	40056	0.093174	0.427736	0.0858932	0.383778	4.59072	4.46809	ENST28	4464	5706	3340	2508	T	3709	70198	22433	59461	10563	0.0636049	0.254391	0.0561871	0.237505	3.99955	4.22703
3737	ENST28	3264	3167	1564	8383	T	3737	45418	6975	24910	15515	0.0718862	0.454128	0.0628237	0.540345	6.31732	8.60099	ENST28	5013	10586	5406	4708	T	3737	33640	19275	35610	8551	0.149044	0.549232	0.151835	0.550631	3.68503	3.62651
3747	ENST28	1050	5067	677	7898	T	3747	58663	23407	33566	55233	0.0179156	0.216507	0.0201984	0.14301	12.0848	7.08025	ENST28	4117	15210	2801	11069	T	3747	77403	76173	67528	41590	0.0532014	0.199688	0.0414933	0.266163	3.75343	6.41461
3749	ENST28	3255	15963	2231	36085	T	3749	57170	40039	33153	92639	0.056952	0.398701	0.0673222	0.389529	7.00066	5.78605	ENST28	5617	39742	4142	24809	T	3749	83064	118693	69927	68277	0.0676338	0.334836	0.0592467	0.363367	4.95072	6.13313
3797	ENST28	1993	1208	1138	3717	T	3797	86045	9657	47862	28024	0.0231737	0.125181	0.0237971	0.132667	5.40188	5.57494	ENST28	1537	7085	1096	3642	T	3797	109812	28858	69972	14047	0.0140056	0.245539	0.0156775	0.259325	17.5314	16.5413
3801	ENST28	1097	3219	824	8303	T	3801	80540	20024	46331	60470	0.0136328	0.160799	0.0178063	0.137322	11.795	7.712	ENST28	3408	17741	2106	10149	T	3801	113036	55252	71601	27536	0.0301583	0.321105	0.0294266	0.368595	10.6473	12.5259
3823	ENST28	7674	33953	4678	66184	T	3823	108686	57361	66663	129201	0.0706156	0.591925	0.0701878	0.51226	8.38235	7.29842	ENST28	10816	48782	8171	26332	T	3823	159054	122347	96414	63682	0.0680079	0.398723	0.0847586	0.413501	5.8629	4.87858
3830	ENST28	2281	60517	3015	115939	T	3830	113724	111301	68838	220172	0.0200659	0.543728	0.0438124	0.526586	27.097	12.0191	ENST28	6301	56562	5907	29733	T	3830	112485	148066	68935	77486	0.0560247	0.382009	0.0857027	0.383729	6.81858	4.47744
3832	ENST28	4817	66879	4735	133251	T	3832	113968	181024	70681	359411	0.0422747	0.369452	0.0670043	0.37075	8.73932	5.53322	ENST28	4143	54980	4498	28536	T	3832	113034	205637	71020	107355	0.0366612	0.267368	0.0633475	0.265817	7.29294	4.19617
3863	ENST28	598	1577	389	3517	T	3863	49708	12218	25598	26840	0.0120501	0.129143	0.015235	0.131068	10.7172	8.60311	ENST28	238	3323	327	1741	T	3863	29129	23476	22763	11791	0.0082046	0.141585	0.0144087	0.147727	17.2568	10.2526
3899	ENST28	725	29103	1394	68282	T	3899	24948	62622	18138	146307	0.0290994	0.464749	0.0769061	0.466707	15.9711	6.06853	ENST28	5667	91878	3854	48671	T	3899	47601	124044	25630	62220	0.119071	0.740691	0.150404	0.782244	6.2206	5.20096
3938	ENST28	2449	32944	2278	56305	T	3938	30032	40958	18222	74091	0.0815769	0.804341	0.125062	0.759947	9.85991	6.07658	ENST28	2494	37393	1906	22842	T	3938	27144	55378	13400	32183	0.0919138	0.675238	0.142303	0.709763	7.34643	4.98769
4090	ENST28	392	873	316	1129	T	4090	8453	3572	5344	5614	0.0464869	0.244612	0.0593078	0.201247	5.26197	3.39326	ENST28	564	1530	184	700	T	4090	10535	7462	3274	3173	0.0536257	0.205145	0.0564885	0.220857	3.82551	3.90977
4263	ENST28	1857	5322	1045	12395	T	4263	63848	10109	32047	24440	0.0290999	0.526508	0.0326385	0.507181	18.0931	15.5393	ENST28	8479	31719	4003	15898	T	4263	120188	44282	71037	20588	0.0705555	0.716302	0.0563642	0.772208	10.1523	13.7003
4266	ENST28	915	3348	645	7149	T	4266	62386	19677	32202	47521	0.0146825	0.17019	0.0200602	0.150457	11.5913	7.50024	ENST28	6547	22952	3759	11634	T	4266	135802	79870	78524	37567	0.0482169	0.287376	0.0478828	0.309705	5.96007	6.46798
4323	ENST28	777	7573	509	12566	T	4323	61772	14735	34429	27305	0.0125945	0.513979	0.0148127	0.460229	40.8098	31.0699	ENST28	2065	9823	1456	5075	T	4323	80040	30476	48308	14951	0.0258118	0.322341	0.03016	0.339486	12.4882	11.2562
4331	ENST28	3897	41143	2943	72837	T	4331	61908	60743	33929	109524	0.0629634	0.677334	0.0867669	0.665035	10.7576	7.66462	ENST28	6013	34359	4854	17232	T	4331	69057	64925	54809	32056	0.0870862	0.529218	0.0885787	0.537574	6.07694	6.06888
4373	ENST28	2358	4057	1582	9226	T	4373	74299	9448	43307	21356	0.0317497	0.429463	0.0365521	0.432036	13.5266	11.8197	ENST28	5582	8023	4292	4095	T	4373	74583	16884	64382	8139	0.0748552	0.475215	0.0666791	0.503194	6.34845	7.54651
4390	ENST28	5184	3208	3157	11035	T	4390	74292	11072	45035	30488	0.0697912	0.289804	0.0701217	0.361967	4.15244	5.16198	ENST28	8563	14962	5932	7665	T	4390	91474	32307	83619	15915	0.0936212	0.463136	0.0709519	0.481654	4.94691	6.78845
4393	ENST28	1653	3809	924	13504	T	4393	83662	15596	50185	46627	0.0197698	0.244278	0.0184314	0.289633	12.3561	15.7141	ENST28	12916	23502	7189	12860	T	4393	117086	58825	97354	30091	0.11032	0.399534	0.0738534	0.427389	3.6216	5.78699
4401	ENST28	1018	4446	719	14515	T	4401	80953	14633	48556	49755	0.0125874	0.303881	0.0148279	0.291744	24.1417	19.6753	ENST28	4839	19838	2900	10198	T	4401	139703	74435	99065	38158	0.0346447	0.266524	0.0292835	0.267276	7.69308	9.1272
4412	ENST28	2372	5841	1533	18613	T	4412	74894	22026	44670	74294	0.0316844	0.26522	0.03434	0.250542	8.37069	7.29593	ENST28	6852	22148	3251	12334	T	4412	158365	106439	95915	56061	0.0432732	0.208089	0.0339047	0.220024	4.80873	6.4895
4427	ENST28	1716	2419	905	6803	T	4427	63314	15119	34971	46336	0.0271184	0.160053	0.0259064	0.146837	5.90201	5.66798	ENST28	2716	24410	1811	13720	T	4427	108879	84046	63219	45358	0.0249541	0.290445	0.0286618	0.302498	11.6392	10.554
4470	ENST28	7108	12542	4893	42480	T	4470	102733	18883	58341	63308	0.0691981	0.664213	0.0838847	0.67101	9.59872	7.9992	ENST28	7302	27648	8416	11271	T	4470	95899	55629	89847	24977	0.0761522	0.497016	0.0936804	0.451277	6.52661	4.8172
4502	ENST28	1319	5800	1007	21849	T	4502	90984	12788	50160	47333	0.0145079	0.453593	0.0200953	0.461613	31.2653	22.9712	ENST28	11914	38056	6590	20864	T	4502	544249	84213	382814	47348	0.0218925	0.451908	0.0172172	0.440664	20.6421	25.5944
4522	ENST28	5875	12548	3755	29413	T	4522	101679	23799	56870	68170	0.0577891	0.527269	0.0660442	0.431474	9.12401	6.53311	ENST28	12461	40002	10352	18134	T	4522	650212	131275	441383	71390	0.019166	0.304724	0.0234558	0.254024	15.8992	10.8299
4546	ENST28	4720	15587	3282	55598	T	4546	153535	41994	91723	135034	0.0307485	0.371187	0.0357922	0.411738	12.0717	11.5036	ENST28	15953	146589	12344	72370	T	4546	216648	262062	171633	124837	0.0736399	0.559369	0.0719263	0.579719	7.59601	8.05991
4549	ENST28	2150	31490	2162	95413	T	4549	143894	72075	87176	244238	0.0149484	0.436914	0.0248116	0.390658	29.2281	15.745	ENST28	16657	254470	13330	131295	T	4549	222597	508717	172479	250356	0.0748345	0.50022	0.0772901	0.524435	6.68436	6.78528
4597	ENST28	5325	16624	4537	61752	T	4597	110381	24367	67030	87227	0.0482506	0.682247	0.0677	0.707949	14.1397	10.4572	ENST28	9664	22562	6355	8305	T	4597	138568	68012	95374	30776	0.0697486	0.331745	0.0666422	0.269877	4.7563	4.04964
4598	ENST28	5030	26385	3788	82013	T	4598	110144	50553	67573	168600	0.0456762	0.521937	0.0560719	0.486438	11.4269	8.67527	ENST28	12373	125443	9751	62676	T	4598	148767	192285	102892	92961	0.0831765	0.652382	0.0947781	0.674222	7.84335	7.11369
4643	ENST28	2315	13934	1925	42274	T	4643	65054	22377	40181	70452	0.0356006	0.62271	0.0479319	0.600045	17.4915	12.5187	ENST28	13916	174155	9838	94959	T	4643	128880	228333	84809	123177	0.107983	0.762725	0.116012	0.770917	7.06336	6.64513
517	ENST28	42	532	68	613	T	517	1956	1787	1652	2655	0.0219724	0.298098	0.0417423	0.231175	13.5669	5.53814	ENST28	96	228	32	101	T	517	2477	771	343	402	0.0391445	0.296632	0.0959302	0.253102	7.57788	2.63839
814	ENST28	47	289	35	373	T	814	1781	1368	1453	1590	0.026936	0.211833	0.0247593	0.235072	7.86432	9.49431	ENST28	125	1034	51	554	T	814	2339	2340	959	1290	0.0538462	0.442119	0.0541667	0.429899	8.21078	7.9366
54	ENST58	963	911	415	5426	T	54	22489	1468	15369	8489	0.0428635	0.62083	0.0270657	0.639223	14.4839	23.6174	ENST58	3572	34700	5940	25460	T	54	22262	44384	37701	34092	0.160491	0.781818	0.157578	0.74681	4.87143	4.73931
68	ENST58	605	3284	630	17813	T	68	17760	7665	10614	41383	0.0341197	0.428516	0.0594442	0.430456	12.5592	7.24135	ENST58	6422	100926	6017	50778	T	68	50517	198597	61471	109536	0.127143	0.508197	0.0978982	0.463579	3.99706	4.73531

## Sheet: stressed_rrna_psis
site	rRNA_subunit.x	wt_noCMC.x_signal	wt_CMC.x_signal	mut_noCMC.x_signal	mut_CMC.x_signal	nt.x	pos.x	wt_noCMC_depth.x	wt_CMC_depth.x	mut_noCMC_depth.x	mut_CMC_depth.x	wt_noCMC_pen.x	wt_CMC_pen.x	mut_noCMC_pen.x	mut_CMC_pen.x	wt_pen_ratio.x	mut_pen_ratio.x	rRNA_subunit.y	wt_noCMC.y_signal	wt_CMC.y_signal	mut_noCMC.y_signal	mut_CMC.y_signal	nt.y	pos.y	wt_noCMC_depth.y	wt_CMC_depth.y	mut_noCMC_depth.y	mut_CMC_depth.y	wt_noCMC_pen.y	wt_CMC_pen.y	mut_noCMC_pen.y	mut_CMC_pen.y	wt_pen_ratio.y	mut_pen_ratio.y
ENST12:560	ENST12	249	1995	271	5651	T	560	6420	3803	5240	9993	0.0389347	0.524711	0.0518985	0.565539	13.4767	10.897	ENST12	712	8766	902	5751	T	560	6245	16365	7661	9808	0.114153	0.535684	0.117854	0.5864	4.69268	4.97564
ENST12:610	ENST12	689	1604	631	5335	T	610	6735	3627	5474	10773	0.102435	0.442393	0.115434	0.495266	4.31878	4.29048	ENST12	1025	6565	1046	5388	T	610	10989	18653	9490	13057	0.0933576	0.351989	0.110315	0.412697	3.77033	3.74108
ENST18:1004	ENST18	3012	16999	2543	54663	T	1004	91943	22840	60163	72063	0.0327699	0.744276	0.0422844	0.758548	22.7121	17.9392	ENST18	8536	54997	9406	30728	T	1004	88069	86021	107703	48323	0.0969343	0.639348	0.0873412	0.635895	6.59569	7.28058
ENST18:1045	ENST18	6052	24724	5988	71911	T	1045	129181	29956	89173	87174	0.0468564	0.82535	0.0671608	0.824915	17.6145	12.2827	ENST18	33969	131676	25930	84218	T	1045	185315	158952	189939	99218	0.183309	0.828402	0.136522	0.848819	4.51917	6.21745
ENST18:1046	ENST18	2272	8930	1764	30792	T	1046	114766	38119	80852	115992	0.0198053	0.234286	0.0218297	0.265473	11.8295	12.1611	ENST18	4204	43917	4616	26954	T	1046	184392	200692	186403	124918	0.0228046	0.218832	0.0247688	0.21578	9.59597	8.71177
ENST18:105	ENST18	4163	6699	4042	29731	T	105	95173	9598	65404	41016	0.0437514	0.697989	0.0618148	0.72487	15.9535	11.7265	ENST18	15676	87631	9527	52081	T	105	186248	129636	132825	74675	0.0841723	0.67598	0.0717329	0.69744	8.03091	9.72272
ENST18:1056	ENST18	4950	56292	5484	156076	T	1056	88024	105290	70011	304867	0.0562454	0.534642	0.0783437	0.511949	9.50553	6.53466	ENST18	20394	265700	18959	161045	T	1056	211980	501819	184184	307147	0.0962115	0.529475	0.10294	0.524327	5.50324	5.09352
ENST18:1081	ENST18	3981	68169	4730	140977	T	1081	141127	235056	110404	564359	0.0282155	0.290015	0.0428513	0.249802	10.2786	5.82949	ENST18	41164	588363	28606	386763	T	1081	303740	953712	231044	575614	0.135527	0.616919	0.123816	0.671914	4.55202	5.42673
ENST18:1136	ENST18	2600	13816	2310	33103	T	1136	67808	35670	49222	84229	0.0383577	0.387345	0.0469496	0.393019	10.0982	8.37109	ENST18	15263	61951	8366	39835	T	1136	167502	160600	101593	101520	0.0911267	0.385751	0.0823572	0.392392	4.23313	4.76451
ENST18:1174	ENST18	658	1499	569	4250	T	1174	33537	8682	25557	27480	0.0196494	0.172751	0.0223022	0.154689	8.79171	6.93602	ENST18	1831	14839	1293	8377	T	1174	62751	40842	31836	20550	0.0291943	0.363343	0.0406445	0.407669	12.4457	10.0301
ENST18:1232	ENST18	619	280	493	1098	T	1232	17398	1425	13312	4576	0.0356342	0.197055	0.0371066	0.240114	5.52993	6.47092	ENST18	162	555	151	178	T	1232	7508	1898	3107	997	0.0217073	0.292786	0.048906	0.179359	13.4879	3.66741
ENST18:1244	ENST18	854	4375	899	16692	T	1244	31700	17268	23218	59086	0.0269708	0.253402	0.0387614	0.282516	9.39544	7.28859	ENST18	342	4887	418	1867	T	1244	5256	17787	5868	6196	0.0652463	0.274792	0.0713921	0.301436	4.21161	4.22226
ENST18:1315	ENST18	6584	26105	4954	65328	T	1315	142014	53276	95504	128458	0.0463683	0.490005	0.0518821	0.508559	10.5677	9.80221	ENST18	10127	56889	8625	33945	T	1315	224383	146735	161621	78113	0.0451369	0.387703	0.0533714	0.43457	8.58949	8.14237
ENST18:1347	ENST18	1640	2183	987	7208	T	1347	88054	11207	55005	35475	0.0186361	0.194861	0.0179617	0.203208	10.4561	11.3134	ENST18	3169	26107	2803	14586	T	1347	125323	77203	104991	41035	0.0252944	0.338169	0.0267068	0.355468	13.3693	13.31
ENST18:1445	ENST18	6736	81370	7367	208263	T	1445	76159	97898	59280	254212	0.0884585	0.831173	0.124289	0.81925	9.39619	6.59147	ENST18	16710	275162	17473	159506	T	1445	139520	351485	117551	206357	0.119774	0.782856	0.148649	0.772963	6.53611	5.19991
ENST18:1693	ENST18	5310	45500	5694	144395	T	1693	68354	70202	64174	220470	0.0776973	0.648135	0.0887417	0.654943	8.34179	7.38033	ENST18	14375	90352	10851	42928	T	1693	225140	196723	119234	107580	0.0638533	0.459288	0.0910135	0.399039	7.19286	4.38439
ENST18:296	ENST18	9152	47865	7642	86665	T	296	58059	70038	45102	133880	0.157647	0.683419	0.169457	0.647336	4.33512	3.82007	ENST18	11052	106601	11392	53228	T	296	146265	236782	115132	136675	0.0755678	0.45021	0.0989551	0.389454	5.95769	3.93566
ENST18:34	ENST18	727	376	479	2072	T	34	67473	978	40659	3673	0.0107893	0.385087	0.0118052	0.564235	35.6914	47.7954	ENST18	3028	13225	4236	7325	T	34	26779	18841	84488	10192	0.113107	0.701942	0.0501485	0.718729	6.20601	14.332
ENST18:36	ENST18	3898	945	1791	4427	T	36	72334	2099	42993	8927	0.053902	0.450476	0.0416802	0.495968	8.35732	11.8994	ENST18	3612	20569	6383	11108	T	36	34690	41056	91264	22122	0.104148	0.501011	0.0699501	0.502147	4.81056	7.17864
ENST18:572	ENST18	16727	137558	16354	300712	T	572	105392	149953	72547	328898	0.15872	0.917341	0.225437	0.914302	5.77961	4.05569	ENST18	52063	454825	38574	241122	T	572	196752	520212	160921	274893	0.264616	0.874307	0.239712	0.877149	3.30406	3.65917
ENST18:609	ENST18	758	2929	490	7188	T	609	60407	19991	40018	40741	0.0125646	0.146559	0.0122692	0.176452	11.6644	14.3817	ENST18	1891	11889	1257	6326	T	609	89868	48972	58040	23892	0.0210529	0.242787	0.0216743	0.264806	11.5322	12.2175
ENST18:681	ENST18	2326	46870	2947	99989	T	681	69224	70936	45226	159593	0.033615	0.660741	0.0651823	0.626527	19.6561	9.61192	ENST18	17930	303115	17226	172310	T	681	100474	374270	104572	210047	0.178462	0.809884	0.164737	0.820341	4.53812	4.97971
ENST18:686	ENST18	2576	72451	3822	153902	T	686	73718	177353	53257	393933	0.0349571	0.408516	0.0717826	0.390682	11.6862	5.44257	ENST18	19833	413741	16498	242619	T	686	148396	839986	132088	474274	0.133655	0.492558	0.124908	0.51156	3.68529	4.09549
ENST18:815	ENST18	3169	25136	2260	48215	T	815	63242	62258	38825	124805	0.0501241	0.403749	0.0582342	0.386328	8.05498	6.63404	ENST18	7237	30715	5838	15948	T	815	94580	101643	67095	50975	0.076527	0.302192	0.0870246	0.312873	3.94883	3.59522
ENST18:863	ENST18	1181	4286	808	7647	T	863	52236	13550	29058	24940	0.0226276	0.31636	0.0278399	0.306644	13.9812	11.0145	ENST18	3891	29200	3409	17344	T	863	42361	47338	40636	26029	0.0918748	0.616849	0.0839137	0.666347	6.71401	7.94086
ENST18:866	ENST18	262	3676	240	9509	T	866	52989	20369	29798	43104	0.0049632	0.180511	0.00808752	0.220624	36.3698	27.2796	ENST18	1869	22614	1460	13298	T	866	48714	74295	44605	41465	0.0383865	0.304391	0.0327534	0.320721	7.92962	9.79197
ENST18:93	ENST18	1409	242	822	1251	T	93	67464	1322	39531	4974	0.0208997	0.183673	0.0208186	0.251658	8.78832	12.0882	ENST18	1763	6307	2167	3530	T	93	127106	22398	100584	11822	0.0138781	0.28162	0.0215539	0.298655	20.2924	13.8562
ENST18:966	ENST18	4764	38616	4746	121037	T	966	82957	49163	55177	155481	0.0574387	0.785473	0.0860307	0.77847	13.675	9.04874	ENST18	15403	157936	11776	96442	T	966	106967	197250	88672	117942	0.144006	0.80069	0.132814	0.817709	5.56013	6.1568
ENST26:1395	ENST26	262	408	237	1206	T	1395	8188	1625	5738	5114	0.0321163	0.251538	0.0414706	0.235973	7.83209	5.69011	ENST26	527	2515	443	1199	T	1395	17880	13218	12868	7825	0.0295286	0.190332	0.0345015	0.153335	6.4457	4.4443
ENST28:1523	ENST28	5997	113874	7077	167887	T	1523	109569	136115	72742	205874	0.0547413	0.836603	0.0973015	0.815485	15.2829	8.38102	ENST28	26707	216964	16323	110779	T	1523	175432	264752	109309	133123	0.15224	0.8195	0.149337	0.832156	5.38293	5.57235
ENST28:1569	ENST28	2909	70236	4022	139347	T	1569	66469	94314	42849	189627	0.0437791	0.744707	0.0938856	0.734849	17.0105	7.82707	ENST28	8015	153387	7547	65431	T	1569	71938	201221	52420	85598	0.111428	0.762282	0.143988	0.764401	6.84105	5.30878
ENST28:1664	ENST28	3085	30137	3272	70100	T	1664	71170	42862	47052	100827	0.0433604	0.703124	0.0695599	0.695253	16.2158	9.99504	ENST28	14176	161169	9230	85941	T	1664	124751	208214	75360	110238	0.113641	0.774056	0.12249	0.779597	6.81138	6.36456
ENST28:1670	ENST28	3831	46609	4202	115709	T	1670	75119	92396	51735	223716	0.0510117	0.504454	0.0812394	0.517216	9.88898	6.36657	ENST28	20138	188715	11090	97774	T	1670	154485	408936	90486	213345	0.130361	0.461479	0.12257	0.458293	3.54	3.73903
ENST28:1731	ENST28	1003	6225	895	13120	T	1731	51600	16827	29095	38463	0.019457	0.369979	0.0307946	0.341124	19.0152	11.0774	ENST28	2019	7804	1886	3479	T	1731	68687	38429	49205	18800	0.0294083	0.203097	0.038349	0.185097	6.90609	4.82663
ENST28:1766	ENST28	754	2373	447	5834	T	1766	56760	5817	29647	12634	0.0133014	0.408044	0.0151106	0.461812	30.6768	30.5621	ENST28	3138	9979	2840	4754	T	1766	79882	23880	55645	10597	0.039295	0.417905	0.0510549	0.44867	10.6351	8.78799
ENST28:1768	ENST28	2297	14414	1481	29450	T	1768	57985	20846	30627	44904	0.0396303	0.691466	0.0483871	0.655851	17.4479	13.5543	ENST28	8052	44473	6483	19888	T	1768	88344	68571	62322	30201	0.091154	0.648574	0.104039	0.658533	7.11514	6.32969
ENST28:1769	ENST28	1902	9642	1380	19939	T	1769	58527	30424	31282	64743	0.0325144	0.316943	0.0441454	0.307982	9.7478	6.97654	ENST28	3008	27526	2735	12542	T	1769	90970	95928	64563	42669	0.0330765	0.286952	0.0423766	0.293954	8.6754	6.9367
ENST28:1779	ENST28	6286	56095	5111	97163	T	1779	70135	113867	40197	216654	0.0896401	0.492641	0.127171	0.448473	5.49576	3.52655	ENST28	9812	58663	4077	33457	T	1779	92757	181103	60493	88131	0.105791	0.323924	0.0674116	0.379635	3.06192	5.6316
ENST28:2495	ENST28	3106	22221	2602	53468	T	2495	45274	33841	29742	82125	0.0686251	0.65664	0.0875164	0.651061	9.56851	7.4393	ENST28	3274	74626	3820	34806	T	2495	40478	109194	33595	54307	0.0809061	0.683429	0.113734	0.640918	8.44718	5.63525
ENST28:2826	ENST28	4127	12581	2696	33108	T	2826	43679	18992	23746	49304	0.0945055	0.662455	0.113572	0.671514	7.00969	5.91266	ENST28	4405	30949	3001	15948	T	2826	63435	64999	37268	34774	0.0694558	0.476154	0.0805495	0.458634	6.85549	5.69382
ENST28:2830	ENST28	2161	21253	1991	46419	T	2830	48607	44719	27314	107259	0.0444783	0.475268	0.072927	0.43278	10.6854	5.93443	ENST28	6609	32483	3365	18295	T	2830	67555	99495	38602	53988	0.0978448	0.326485	0.0871953	0.338884	3.33677	3.88649
ENST28:3562	ENST28	989	793	619	951	T	3562	14607	3231	9215	4002	0.0677711	0.245668	0.0672743	0.237822	3.62497	3.5351	ENST28	379	1100	251	590	T	3562	11934	6359	7717	3417	0.0318391	0.173113	0.0326509	0.172908	5.43712	5.29565
ENST28:3616	ENST28	2919	10035	1715	17675	T	3616	41716	12502	20931	22087	0.0699954	0.802687	0.0819797	0.800254	11.4677	9.7616	ENST28	7894	47117	6991	22536	T	3616	44788	56903	42719	27138	0.176271	0.828026	0.16367	0.830429	4.69746	5.07379
ENST28:3674	ENST28	2999	12620	1861	25842	T	3674	66612	19554	33848	38852	0.0450363	0.64541	0.055009	0.665148	14.3309	12.0916	ENST28	3704	16061	3470	7981	T	3674	50412	26977	46110	12376	0.0734929	0.595374	0.0752749	0.644906	8.1011	8.56735
ENST28:3709	ENST28	6424	8993	2921	15372	T	3709	68956	21026	34018	40056	0.093174	0.427736	0.0858932	0.383778	4.59072	4.46809	ENST28	4464	5706	3340	2508	T	3709	70198	22433	59461	10563	0.0636049	0.254391	0.0561871	0.237505	3.99955	4.22703
ENST28:3737	ENST28	3264	3167	1564	8383	T	3737	45418	6975	24910	15515	0.0718862	0.454128	0.0628237	0.540345	6.31732	8.60099	ENST28	5013	10586	5406	4708	T	3737	33640	19275	35610	8551	0.149044	0.549232	0.151835	0.550631	3.68503	3.62651
ENST28:3747	ENST28	1050	5067	677	7898	T	3747	58663	23407	33566	55233	0.0179156	0.216507	0.0201984	0.14301	12.0848	7.08025	ENST28	4117	15210	2801	11069	T	3747	77403	76173	67528	41590	0.0532014	0.199688	0.0414933	0.266163	3.75343	6.41461
ENST28:3749	ENST28	3255	15963	2231	36085	T	3749	57170	40039	33153	92639	0.056952	0.398701	0.0673222	0.389529	7.00066	5.78605	ENST28	5617	39742	4142	24809	T	3749	83064	118693	69927	68277	0.0676338	0.334836	0.0592467	0.363367	4.95072	6.13313
ENST28:3797	ENST28	1993	1208	1138	3717	T	3797	86045	9657	47862	28024	0.0231737	0.125181	0.0237971	0.132667	5.40188	5.57494	ENST28	1537	7085	1096	3642	T	3797	109812	28858	69972	14047	0.0140056	0.245539	0.0156775	0.259325	17.5314	16.5413
ENST28:3801	ENST28	1097	3219	824	8303	T	3801	80540	20024	46331	60470	0.0136328	0.160799	0.0178063	0.137322	11.795	7.712	ENST28	3408	17741	2106	10149	T	3801	113036	55252	71601	27536	0.0301583	0.321105	0.0294266	0.368595	10.6473	12.5259
ENST28:3823	ENST28	7674	33953	4678	66184	T	3823	108686	57361	66663	129201	0.0706156	0.591925	0.0701878	0.51226	8.38235	7.29842	ENST28	10816	48782	8171	26332	T	3823	159054	122347	96414	63682	0.0680079	0.398723	0.0847586	0.413501	5.8629	4.87858
ENST28:3830	ENST28	2281	60517	3015	115939	T	3830	113724	111301	68838	220172	0.0200659	0.543728	0.0438124	0.526586	27.097	12.0191	ENST28	6301	56562	5907	29733	T	3830	112485	148066	68935	77486	0.0560247	0.382009	0.0857027	0.383729	6.81858	4.47744
ENST28:3832	ENST28	4817	66879	4735	133251	T	3832	113968	181024	70681	359411	0.0422747	0.369452	0.0670043	0.37075	8.73932	5.53322	ENST28	4143	54980	4498	28536	T	3832	113034	205637	71020	107355	0.0366612	0.267368	0.0633475	0.265817	7.29294	4.19617
ENST28:3863	ENST28	598	1577	389	3517	T	3863	49708	12218	25598	26840	0.0120501	0.129143	0.015235	0.131068	10.7172	8.60311	ENST28	238	3323	327	1741	T	3863	29129	23476	22763	11791	0.0082046	0.141585	0.0144087	0.147727	17.2568	10.2526
ENST28:3899	ENST28	725	29103	1394	68282	T	3899	24948	62622	18138	146307	0.0290994	0.464749	0.0769061	0.466707	15.9711	6.06853	ENST28	5667	91878	3854	48671	T	3899	47601	124044	25630	62220	0.119071	0.740691	0.150404	0.782244	6.2206	5.20096
ENST28:3938	ENST28	2449	32944	2278	56305	T	3938	30032	40958	18222	74091	0.0815769	0.804341	0.125062	0.759947	9.85991	6.07658	ENST28	2494	37393	1906	22842	T	3938	27144	55378	13400	32183	0.0919138	0.675238	0.142303	0.709763	7.34643	4.98769
ENST28:4263	ENST28	1857	5322	1045	12395	T	4263	63848	10109	32047	24440	0.0290999	0.526508	0.0326385	0.507181	18.0931	15.5393	ENST28	8479	31719	4003	15898	T	4263	120188	44282	71037	20588	0.0705555	0.716302	0.0563642	0.772208	10.1523	13.7003
ENST28:4266	ENST28	915	3348	645	7149	T	4266	62386	19677	32202	47521	0.0146825	0.17019	0.0200602	0.150457	11.5913	7.50024	ENST28	6547	22952	3759	11634	T	4266	135802	79870	78524	37567	0.0482169	0.287376	0.0478828	0.309705	5.96007	6.46798
ENST28:4323	ENST28	777	7573	509	12566	T	4323	61772	14735	34429	27305	0.0125945	0.513979	0.0148127	0.460229	40.8098	31.0699	ENST28	2065	9823	1456	5075	T	4323	80040	30476	48308	14951	0.0258118	0.322341	0.03016	0.339486	12.4882	11.2562
ENST28:4331	ENST28	3897	41143	2943	72837	T	4331	61908	60743	33929	109524	0.0629634	0.677334	0.0867669	0.665035	10.7576	7.66462	ENST28	6013	34359	4854	17232	T	4331	69057	64925	54809	32056	0.0870862	0.529218	0.0885787	0.537574	6.07694	6.06888
ENST28:4373	ENST28	2358	4057	1582	9226	T	4373	74299	9448	43307	21356	0.0317497	0.429463	0.0365521	0.432036	13.5266	11.8197	ENST28	5582	8023	4292	4095	T	4373	74583	16884	64382	8139	0.0748552	0.475215	0.0666791	0.503194	6.34845	7.54651
ENST28:4390	ENST28	5184	3208	3157	11035	T	4390	74292	11072	45035	30488	0.0697912	0.289804	0.0701217	0.361967	4.15244	5.16198	ENST28	8563	14962	5932	7665	T	4390	91474	32307	83619	15915	0.0936212	0.463136	0.0709519	0.481654	4.94691	6.78845
ENST28:4393	ENST28	1653	3809	924	13504	T	4393	83662	15596	50185	46627	0.0197698	0.244278	0.0184314	0.289633	12.3561	15.7141	ENST28	12916	23502	7189	12860	T	4393	117086	58825	97354	30091	0.11032	0.399534	0.0738534	0.427389	3.6216	5.78699
ENST28:4401	ENST28	1018	4446	719	14515	T	4401	80953	14633	48556	49755	0.0125874	0.303881	0.0148279	0.291744	24.1417	19.6753	ENST28	4839	19838	2900	10198	T	4401	139703	74435	99065	38158	0.0346447	0.266524	0.0292835	0.267276	7.69308	9.1272
ENST28:4412	ENST28	2372	5841	1533	18613	T	4412	74894	22026	44670	74294	0.0316844	0.26522	0.03434	0.250542	8.37069	7.29593	ENST28	6852	22148	3251	12334	T	4412	158365	106439	95915	56061	0.0432732	0.208089	0.0339047	0.220024	4.80873	6.4895
ENST28:4427	ENST28	1716	2419	905	6803	T	4427	63314	15119	34971	46336	0.0271184	0.160053	0.0259064	0.146837	5.90201	5.66798	ENST28	2716	24410	1811	13720	T	4427	108879	84046	63219	45358	0.0249541	0.290445	0.0286618	0.302498	11.6392	10.554
ENST28:4470	ENST28	7108	12542	4893	42480	T	4470	102733	18883	58341	63308	0.0691981	0.664213	0.0838847	0.67101	9.59872	7.9992	ENST28	7302	27648	8416	11271	T	4470	95899	55629	89847	24977	0.0761522	0.497016	0.0936804	0.451277	6.52661	4.8172
ENST28:4502	ENST28	1319	5800	1007	21849	T	4502	90984	12788	50160	47333	0.0145079	0.453593	0.0200953	0.461613	31.2653	22.9712	ENST28	11914	38056	6590	20864	T	4502	544249	84213	382814	47348	0.0218925	0.451908	0.0172172	0.440664	20.6421	25.5944
ENST28:4522	ENST28	5875	12548	3755	29413	T	4522	101679	23799	56870	68170	0.0577891	0.527269	0.0660442	0.431474	9.12401	6.53311	ENST28	12461	40002	10352	18134	T	4522	650212	131275	441383	71390	0.019166	0.304724	0.0234558	0.254024	15.8992	10.8299
ENST28:4546	ENST28	4720	15587	3282	55598	T	4546	153535	41994	91723	135034	0.0307485	0.371187	0.0357922	0.411738	12.0717	11.5036	ENST28	15953	146589	12344	72370	T	4546	216648	262062	171633	124837	0.0736399	0.559369	0.0719263	0.579719	7.59601	8.05991
ENST28:4549	ENST28	2150	31490	2162	95413	T	4549	143894	72075	87176	244238	0.0149484	0.436914	0.0248116	0.390658	29.2281	15.745	ENST28	16657	254470	13330	131295	T	4549	222597	508717	172479	250356	0.0748345	0.50022	0.0772901	0.524435	6.68436	6.78528
ENST28:4597	ENST28	5325	16624	4537	61752	T	4597	110381	24367	67030	87227	0.0482506	0.682247	0.0677	0.707949	14.1397	10.4572	ENST28	9664	22562	6355	8305	T	4597	138568	68012	95374	30776	0.0697486	0.331745	0.0666422	0.269877	4.7563	4.04964
ENST28:4598	ENST28	5030	26385	3788	82013	T	4598	110144	50553	67573	168600	0.0456762	0.521937	0.0560719	0.486438	11.4269	8.67527	ENST28	12373	125443	9751	62676	T	4598	148767	192285	102892	92961	0.0831765	0.652382	0.0947781	0.674222	7.84335	7.11369
ENST28:4643	ENST28	2315	13934	1925	42274	T	4643	65054	22377	40181	70452	0.0356006	0.62271	0.0479319	0.600045	17.4915	12.5187	ENST28	13916	174155	9838	94959	T	4643	128880	228333	84809	123177	0.107983	0.762725	0.116012	0.770917	7.06336	6.64513
ENST28:4937	ENST28	7532	71982	7176	139303	T	4937	117382	80437	69702	157137	0.0641745	0.894888	0.102965	0.886507	13.9446	8.60976	ENST28	27710	196732	30118	134385	T	4937	101186	218499	178741	150708	0.273859	0.90038	0.168505	0.891692	3.28775	5.29177
ENST28:814	ENST28	47	289	35	373	T	814	1781	1368	1453	1590	0.026936	0.211833	0.0247593	0.235072	7.86432	9.49431	ENST28	125	1034	51	554	T	814	2339	2340	959	1290	0.0538462	0.442119	0.0541667	0.429899	8.21078	7.9366
ENST58:54	ENST58	963	911	415	5426	T	54	22489	1468	15369	8489	0.0428635	0.62083	0.0270657	0.639223	14.4839	23.6174	ENST58	3572	34700	5940	25460	T	54	22262	44384	37701	34092	0.160491	0.781818	0.157578	0.74681	4.87143	4.73931
ENST58:68	ENST58	605	3284	630	17813	T	68	17760	7665	10614	41383	0.0341197	0.428516	0.0594442	0.430456	12.5592	7.24135	ENST58	6422	100926	6017	50778	T	68	50517	198597	61471	109536	0.127143	0.508197	0.0978982	0.463579	3.99706	4.73531
