# Supplementary material
Source: HighWire-hosted journal article supplement (doi:10.1101/rna.062794.117)
Supplement: Supplemental_Table_S2.xlsx [file Supplemental_Table_S2.xlsx]

## Sheet: tachy_trna_psis
site	wt_noCMC_signal	wt_CMC_signal	mut_noCMC_signal	mut_CMC_signal	nt	gene	pos	wt_noCMC_depth	wt_CMC_depth	mut_noCMC_depth	mut_CMC_depth	wt_noCMC_pen	wt_CMC_pen	mut_noCMC_pen	mut_CMC_pen	wt_pen_ratio	mut_pen_ratio
TGME49_202320:26	17	181	17	387	T	TGME49_202320	26	984	353	276	976	0.0182741	0.514124	0.0649819	0.397134	28.134	6.11145
TGME49_207365:39	198	2766	155	3554	T	TGME49_207365	39	5796	3414	2615	4968	0.0343281	0.810249	0.059633	0.715436	23.6031	11.9973
TGME49_207810:43	46	474	27	322	T	TGME49_207810	43	3540	1230	1519	1356	0.0132731	0.385865	0.0184211	0.238025	29.0712	12.9214
TGME49_208480:43	38	454	17	344	T	TGME49_208480	43	3593	1222	1492	1394	0.0108514	0.372036	0.0120563	0.247312	34.2845	20.5131
TGME49_214450:20	10	5	5	14	T	TGME49_214450	20	250	11	40	31	0.0438247	0.5	0.146341	0.46875	11.4091	3.20312
TGME49_218440:13	12	54	17	141	T	TGME49_218440	13	159	97	181	507	0.08125	0.561224	0.0989011	0.279528	6.90738	2.82633
TGME49_218440:25	30	229	34	412	T	TGME49_218440	25	403	514	398	1322	0.0767327	0.446602	0.0877193	0.312169	5.82023	3.55873
TGME49_218440:26	67	652	78	1130	T	TGME49_218440	26	470	1166	476	2452	0.144374	0.559554	0.165618	0.461068	3.87574	2.78392
TGME49_220550:26	94	171	57	564	T	TGME49_220550	26	1789	313	924	1005	0.0530726	0.547771	0.0627027	0.56163	10.3212	8.95703
TGME49_220620:39	195	2636	157	3620	T	TGME49_220620	39	1935	2855	944	3984	0.10124	0.923319	0.167196	0.908657	9.12013	5.43469
TGME49_221290:39	52	520	18	529	T	TGME49_221290	39	876	791	572	1171	0.0604333	0.657828	0.0331588	0.452218	10.8852	13.638
TGME49_222680:39	130	758	71	593	T	TGME49_222680	39	4316	1873	2556	2211	0.0303451	0.405016	0.028158	0.268535	13.347	9.53673
TGME49_246680:24	5	16	7	41	T	TGME49_246680	24	41	26	26	107	0.142857	0.62963	0.296296	0.388889	4.40741	1.3125
TGME49_251700:27	438	784	171	848	T	TGME49_251700	27	7876	1966	3794	3052	0.0557319	0.399085	0.0453228	0.278087	7.1608	6.1357
TGME49_253840:27	0	15	2	29	T	TGME49_253840	27	42	23	40	59	0.0232558	0.666667	0.0731707	0.5	28.6667	6.83333
TGME49_257140:27	11	14	9	16	T	TGME49_257140	27	407	78	322	202	0.0294118	0.189873	0.0309598	0.0837438	6.4557	2.70493
TGME49_262568:20	11	8	1	9	T	TGME49_262568	20	282	10	37	17	0.0424028	0.818182	0.0526316	0.555556	19.2955	10.5556
TGME49_262568:21	30	10	11	27	T	TGME49_262568	21	312	20	48	44	0.0990415	0.52381	0.244898	0.622222	5.28879	2.54074
TGME49_262568:28	33	233	18	249	T	TGME49_262568	28	362	262	70	304	0.0936639	0.889734	0.267606	0.819672	9.49922	3.06299
TGME49_271891:26	7	62	7	173	T	TGME49_271891	26	237	152	88	348	0.0336134	0.411765	0.0898876	0.498567	12.25	5.54656
TGME49_272220:13	0	22	2	81	T	TGME49_272220	13	3	24	4	88	0.25	0.92	0.6	0.921348	3.68	1.53558
TGME49_275340:39	204	2285	156	3517	T	TGME49_275340	39	1135	2470	790	4012	0.180458	0.925132	0.198483	0.876651	5.12658	4.41676
TGME49_277960:25	0	12	3	28	T	TGME49_277960	25	38	29	26	73	0.025641	0.433333	0.148148	0.391892	16.9	2.64527
TGME49_288760:13	2	8	0	10	T	TGME49_288760	13	21	10	15	30	0.136364	0.818182	0.0625	0.354839	6	5.67742
TGME49_288760:24	5	21	5	23	T	TGME49_288760	24	57	56	30	80	0.103448	0.385965	0.193548	0.296296	3.73099	1.53086
TGME49_290320:39	89	201	33	298	T	TGME49_290320	39	2651	383	1045	615	0.0339367	0.526042	0.0325048	0.48539	15.5007	14.9329
TGME49_290320:40	44	513	24	512	T	TGME49_290320	40	2695	896	1069	1127	0.0166914	0.573021	0.0233645	0.454787	34.3303	19.4649
TGME49_293750:28	273	262	145	446	T	TGME49_293750	28	2290	582	1190	1145	0.119598	0.451115	0.122586	0.390052	3.77191	3.18187
TGME49_293750:34	499	1272	316	812	T	TGME49_293750	34	4222	2467	2085	2530	0.118399	0.515802	0.151965	0.321217	4.35647	2.11375
TGME49_308910:33	137	270	70	203	T	TGME49_308910	33	4528	2118	3368	2705	0.0304703	0.127891	0.0210745	0.075388	4.19722	3.57721
TGME49_311190:13	9	9	1	28	T	TGME49_311190	13	91	11	22	48	0.108696	0.833333	0.0869565	0.591837	7.66667	6.80612
TGME49_311190:26	8	88	6	156	T	TGME49_311190	26	320	189	96	345	0.0280374	0.468421	0.0721649	0.453757	16.707	6.28778
TGME49_315650:27	29	65	12	87	T	TGME49_315650	27	409	139	240	283	0.0731707	0.471429	0.0539419	0.309859	6.44286	5.74431
TGME49_321350:41	4	159	4	252	T	TGME49_321350	41	51	167	35	269	0.0961538	0.952381	0.138889	0.937037	9.90476	6.74667
TGME49_355110:29	0	5	1	6	T	TGME49_355110	29	12	9	20	19	0.0769231	0.6	0.0952381	0.35	7.8	3.675
TGME49_202320:26	14	43	148	193	T	TGME49_202320	26	175	77	2878	1009	0.0852273	0.564103	0.0517541	0.192079	6.6188	3.71138
TGME49_202670:31	38	625	123	1333	T	TGME49_202670	31	184	746	706	1795	0.210811	0.838019	0.175389	0.742762	3.97522	4.23494
TGME49_202670:37	13	393	25	825	T	TGME49_202670	37	360	1844	1139	3653	0.0387812	0.21355	0.022807	0.226054	5.50654	9.91158
TGME49_202670:4	0	6	4	0	T	TGME49_202670	4	27	8	353	66	0.0357143	0.777778	0.0141243	0.0149254	21.7778	1.05672
TGME49_207810:28	10	16	23	18	T	TGME49_207810	28	711	137	2510	572	0.0154494	0.123188	0.00955795	0.0331588	7.97365	3.46924
TGME49_208460:31	150	62	18	152	T	TGME49_208460	31	4301	168	5277	2081	0.0351	0.372781	0.00359985	0.073487	10.6206	20.4139
TGME49_208460:32	14	27	10	48	T	TGME49_208460	32	4315	195	5287	2129	0.00347544	0.142857	0.00208018	0.0230047	41.1048	11.059
TGME49_208460:33	118	37	112	27	T	TGME49_208460	33	4433	232	5399	2156	0.0268381	0.16309	0.0209259	0.012981	6.07682	0.620331
TGME49_208460:37	214	3283	98	3083	T	TGME49_208460	37	4797	3769	5596	5523	0.0448103	0.871088	0.017688	0.558291	19.4394	31.5632
TGME49_213500:32	0	6	0	0	T	TGME49_213500	32	451	31	296	159	0.00221239	0.21875	0.003367	0.00625	98.875	1.85625
TGME49_213500:35	16	22	67	22	T	TGME49_213500	35	548	90	387	217	0.0309654	0.252747	0.175258	0.105505	8.16225	0.601997
TGME49_214450:16	0	5	78	29	T	TGME49_214450	16	22	8	113	51	0.0434783	0.666667	0.692982	0.576923	15.3333	0.832522
TGME49_214450:28	11	29	0	196	T	TGME49_214450	28	532	92	1037	640	0.0225141	0.322581	0.000963391	0.307332	14.328	319.011
TGME49_216570:27	113	11	155	173	T	TGME49_216570	27	2988	81	2724	1344	0.0381398	0.146341	0.0572477	0.129368	3.83697	2.25979
TGME49_218440:26	44	21	42	77	T	TGME49_218440	26	985	92	3297	1411	0.0456389	0.236559	0.0130382	0.0552408	5.18327	4.23684
TGME49_220425:47	28	126	68	170	T	TGME49_220425	47	717	605	577	860	0.04039	0.209571	0.119377	0.198606	5.18869	1.66369
TGME49_220550:26	345	121	177	399	T	TGME49_220550	26	4508	317	2267	1153	0.0767354	0.383648	0.0784832	0.34662	4.99962	4.41649
TGME49_220550:37	30	329	10	188	T	TGME49_220550	37	7787	1081	3207	1844	0.00398048	0.304991	0.00342893	0.102439	76.6215	29.8749
TGME49_222680:39	589	804	321	1222	T	TGME49_222680	39	30886	5686	15639	11390	0.0191019	0.141551	0.0205882	0.107365	7.41031	5.21489
TGME49_225024:37	36	218	22	371	T	TGME49_225024	37	804	897	1316	1913	0.0459627	0.243875	0.0174639	0.194357	5.30594	11.1291
TGME49_229960:34	0	10	0	33	T	TGME49_229960	34	265	19	65	87	0.0037594	0.55	0.0151515	0.386364	146.3	25.5
TGME49_232070:37	27	187	22	354	T	TGME49_232070	37	856	1082	1503	2283	0.0326721	0.173592	0.0152926	0.155429	5.31315	10.1637
TGME49_236153:39	127	531	6	688	T	TGME49_236153	39	11389	1760	14210	6792	0.0112379	0.302101	0.000492576	0.101428	26.8823	205.913
TGME49_236158:39	45	336	103	443	T	TGME49_236158	39	8728	1322	15603	7301	0.00526979	0.254724	0.00666496	0.0608053	48.3367	9.12313
TGME49_236810:33	328	135	250	1579	T	TGME49_236810	33	3034	311	6030	3014	0.108402	0.435897	0.0416183	0.524046	4.02112	12.5917
TGME49_251700:27	903	214	488	857	T	TGME49_251700	27	41113	1515	21329	11229	0.0219876	0.141821	0.0229255	0.0764025	6.45001	3.33265
TGME49_253010:38	82	607	62	579	T	TGME49_253010	38	12711	1774	8239	4121	0.00652926	0.342535	0.00764563	0.140708	52.4615	18.4038
TGME49_253840:28	0	5	0	0	T	TGME49_253840	28	210	49	368	300	0.00473934	0.12	0.00271003	0.00332226	25.32	1.22591
TGME49_253840:32	0	7	0	0	T	TGME49_253840	32	219	56	368	300	0.00454545	0.140351	0.00271003	0.00332226	30.8772	1.22591
TGME49_253840:39	0	37	0	13	T	TGME49_253840	39	359	287	398	426	0.00277778	0.131944	0.00250627	0.0327869	47.5	13.082
TGME49_257140:39	75	404	38	402	T	TGME49_257140	39	15996	2286	6829	4413	0.00475089	0.177088	0.0057101	0.0913004	37.2747	15.9893
TGME49_257383:32	64	19	6	37	T	TGME49_257383	32	2444	149	1958	871	0.0265849	0.133333	0.00357325	0.043578	5.01538	12.1956
TGME49_262568:28	11	32	0	204	T	TGME49_262568	28	577	110	1082	698	0.0207612	0.297297	0.000923361	0.293276	14.3198	317.618
TGME49_269228:34	16	37	0	38	T	TGME49_269228	34	105	43	24	84	0.160377	0.863636	0.04	0.458824	5.38503	11.4706
TGME49_269810:26	53	9	30	126	T	TGME49_269810	26	2922	77	2972	1641	0.0184742	0.128205	0.0104272	0.0773447	6.9397	7.41761
TGME49_269810:32	106	25	13	22	T	TGME49_269810	32	3174	120	3145	1708	0.0337008	0.214876	0.0044501	0.0134582	6.37599	3.02424
TGME49_270180:31	0	50	1	59	T	TGME49_270180	31	42	92	315	367	0.0232558	0.548387	0.00632911	0.163043	23.5806	25.7609
TGME49_270180:37	17	142	41	414	T	TGME49_270180	37	705	779	1212	2494	0.0254958	0.183333	0.0346249	0.166333	7.19074	4.80385
TGME49_271830:27	2048	177	1268	1328	T	TGME49_271830	27	17098	417	8834	3709	0.119832	0.425837	0.143633	0.358221	3.55363	2.494
TGME49_271830:42	474	173	127	171	T	TGME49_271830	42	19235	992	9344	4491	0.0246933	0.175227	0.0136972	0.0382903	7.09612	2.79549
TGME49_271830:47	1298	796	1187	881	T	TGME49_271830	47	24306	3612	13205	7936	0.0534414	0.220592	0.0899591	0.111125	4.12774	1.23528
TGME49_272220:26	11	49	28	293	T	TGME49_272220	26	273	95	1382	732	0.0437956	0.520833	0.0209689	0.401091	11.8924	19.1279
TGME49_275820:34	6	75	87	271	T	TGME49_275820	34	421	306	4041	1849	0.0165877	0.247557	0.0217714	0.147027	14.9242	6.75322
TGME49_275820:39	35	272	57	521	T	TGME49_275820	39	487	757	4190	3028	0.0737705	0.360158	0.0138392	0.172334	4.88215	12.4526
TGME49_277960:33	41	103	10	136	T	TGME49_277960	33	425	244	1875	1231	0.0985915	0.42449	0.00586354	0.111201	4.30554	18.9649
TGME49_277960:34	10	35	16	59	T	TGME49_277960	34	420	276	1768	1290	0.0261283	0.129964	0.00960995	0.0464756	4.97407	4.8362
TGME49_288760:37	9	475	44	793	T	TGME49_288760	37	366	1916	1181	3507	0.027248	0.248305	0.0380711	0.22634	9.11278	5.94519
TGME49_290320:39	957	2484	885	5658	T	TGME49_290320	39	29905	4441	15934	13102	0.0320337	0.559433	0.0556009	0.431886	17.4639	7.76761
TGME49_292180:27	0	13	0	0	T	TGME49_292180	27	58	29	291	49	0.0169492	0.466667	0.00342466	0.02	27.5333	5.84
TGME49_293750:28	1081	112	941	835	T	TGME49_293750	28	20834	499	13075	4584	0.0519318	0.226	0.0720404	0.182334	4.35186	2.53099
TGME49_293750:34	367	312	137	362	T	TGME49_293750	34	22996	1242	14166	5705	0.0160021	0.25181	0.00974095	0.0636172	15.7361	6.53091
TGME49_293750:36	350	277	76	393	T	TGME49_293750	36	24838	2312	14685	7063	0.014131	0.12019	0.00524309	0.0557758	8.50543	10.638
TGME49_293880:32	105	645	79	577	T	TGME49_293880	32	1268	795	1264	901	0.0835303	0.811558	0.0632411	0.640798	9.71572	10.1326
TGME49_294100:29	17	18	47	22	T	TGME49_294100	29	325	74	1817	870	0.0552147	0.253333	0.0264026	0.0264064	4.58815	1.00014
TGME49_294100:33	46	104	9	163	T	TGME49_294100	33	438	260	1866	1275	0.107062	0.402299	0.00535619	0.128527	3.75764	23.9959
TGME49_299825:19	0	15	237	66	T	TGME49_299825	19	26	25	410	67	0.037037	0.615385	0.579075	0.985294	16.6154	1.7015
TGME49_316500:42	57	22	0	42	T	TGME49_316500	42	400	36	405	144	0.144638	0.621622	0.00246305	0.296552	4.29776	120.4
TGME49_316590:35	492	955	36	423	T	TGME49_316590	35	13407	3421	7850	5861	0.0367691	0.279369	0.00471278	0.0723303	7.59792	15.3477
TGME49_321350:35	1	5	0	0	T	TGME49_321350	35	154	12	174	68	0.0129032	0.461538	0.00571429	0.0144928	35.7692	2.53623
TGME49_328550:26	319	130	170	460	T	TGME49_328550	26	4508	307	2204	1302	0.0709692	0.425325	0.077551	0.353799	5.99309	4.56214
TGME49_355040:62	0	7	0	16	T	TGME49_355040	62	42	25	98	115	0.0232558	0.307692	0.010101	0.146552	13.2308	14.5086
TGME49_355050:40	10	30	0	84	T	TGME49_355050	40	90	50	172	201	0.120879	0.607843	0.00578035	0.420792	5.02852	72.797
TGME49_355080:39	0	6	0	0	T	TGME49_355080	39	282	28	65	63	0.00353357	0.241379	0.0151515	0.015625	68.3103	1.03125
TGME49_355110:46	0	5	0	0	T	TGME49_355110	46	48	43	28	93	0.0204082	0.136364	0.0344828	0.0106383	6.68182	0.308511
TGME49_355110:47	1	9	45	26	T	TGME49_355110	47	49	52	73	119	0.04	0.188679	0.621622	0.225	4.71698	0.361957
TGME49_355140:45	9	8	0	0	T	TGME49_355140	45	289	63	54	85	0.0344828	0.140625	0.0181818	0.0116279	4.07812	0.639535
TGME49_355210:49	0	17	0	15	T	TGME49_355210	49	66	73	1	133	0.0149254	0.243243	0.5	0.119403	16.2973	0.238806
TGME49_355210:53	0	21	0	0	T	TGME49_355210	53	107	106	38	133	0.00925926	0.205607	0.025641	0.00746269	22.2056	0.291045

## Sheet: tachy_pus1_psis
site	wt_noCMC.x_signal	wt_CMC.x_signal	mut_noCMC.x_signal	mut_CMC.x_signal	nt.x	gene.x	pos.x	wt_noCMC_depth.x	wt_CMC_depth.x	mut_noCMC_depth.x	mut_CMC_depth.x	wt_noCMC_pen.x	wt_CMC_pen.x	mut_noCMC_pen.x	mut_CMC_pen.x	wt_pen_ratio.x	mut_pen_ratio.x	wt_noCMC.y_signal	wt_CMC.y_signal	mut_noCMC.y_signal	mut_CMC.y_signal	nt.y	gene.y	pos.y	wt_noCMC_depth.y	wt_CMC_depth.y	mut_noCMC_depth.y	mut_CMC_depth.y	wt_noCMC_pen.y	wt_CMC_pen.y	mut_noCMC_pen.y	mut_CMC_pen.y	wt_pen_ratio.y	mut_pen_ratio.y	binom
TGME49_251700:27	438	784	171	848	T	TGME49_251700	27	7876	1966	3794	3052	0.0557319	0.399085	0.0453228	0.278087	7.1608	6.1357	903	214	488	857	T	TGME49_251700	27	41113	1515	21329	11229	0.0219876	0.141821	0.0229255	0.0764025	6.45001	3.33265	p < 1.00E-100
TGME49_293750:34	499	1272	316	812	T	TGME49_293750	34	4222	2467	2085	2530	0.118399	0.515802	0.151965	0.321217	4.35647	2.11375	367	312	137	362	T	TGME49_293750	34	22996	1242	14166	5705	0.0160021	0.25181	0.00974095	0.0636172	15.7361	6.53091	p < 1.00E-100

## Sheet: brady_trna_psis
site	wt_noCMC_signal	wt_CMC_signal	mut_noCMC_signal	mut_CMC_signal	nt	gene	pos	wt_noCMC_depth	wt_CMC_depth	mut_noCMC_depth	mut_CMC_depth	wt_noCMC_pen	wt_CMC_pen	mut_noCMC_pen	mut_CMC_pen	wt_pen_ratio	mut_pen_ratio
TGME49_208460:37	145	375	159	4676	T	TGME49_208460	37	4867	798	2076	9544	0.0299918	0.470588	0.0770342	0.489995	15.6906	6.36074
TGME49_220550:37	17	56	36	480	T	TGME49_220550	37	4706	400	4576	4386	0.00382409	0.142145	0.0080839	0.109642	37.1708	13.563
TGME49_225024:27	0	6	5	0	T	TGME49_225024	27	46	36	40	118	0.0212766	0.189189	0.146341	0.00840336	8.89189	0.057423
TGME49_232070:25	3	13	5	0	T	TGME49_232070	25	108	69	51	101	0.0366972	0.2	0.115385	0.00980392	5.45	0.0849673
TGME49_253010:38	57	104	61	616	T	TGME49_253010	38	8133	725	5214	7749	0.00713056	0.144628	0.0118888	0.0796129	20.2828	6.69647
TGME49_262568:28	12	21	15	0	T	TGME49_262568	28	330	135	136	533	0.0392749	0.161765	0.116788	0.00187266	4.11878	0.0160346
TGME49_270180:13	0	22	5	284	T	TGME49_270180	13	114	71	143	284	0.00869565	0.319444	0.0416667	1	36.7361	24
TGME49_272220:26	37	71	54	385	T	TGME49_272220	26	497	154	249	1316	0.0763052	0.464516	0.22	0.29309	6.08761	1.33223
TGME49_275820:13	0	16	2	0	T	TGME49_275820	13	25	32	46	18	0.0384615	0.515152	0.0638298	0.0526316	13.3939	0.824561
TGME49_290320:39	408	433	249	4659	T	TGME49_290320	39	12872	1453	7210	13588	0.0317719	0.298487	0.0346693	0.342924	9.39468	9.89131
TGME49_292180:27	0	17	1	0	T	TGME49_292180	27	28	48	71	1	0.0344828	0.367347	0.0277778	0.5	10.6531	18
TGME49_293750:28	497	168	281	4514	T	TGME49_293750	28	9545	839	4254	11647	0.0521684	0.20119	0.066275	0.38762	3.85655	5.84867
TGME49_299825:32	39	49	141	745	T	TGME49_299825	32	1050	311	1214	4969	0.038059	0.160256	0.116872	0.150101	4.21074	1.28431
TGME49_316590:35	191	198	821	1881	T	TGME49_316590	35	7785	1067	6360	11756	0.0246596	0.18633	0.129225	0.160075	7.55605	1.23873
TGME49_355090:46	0	17	0	0	T	TGME49_355090	46	94	43	33	47	0.0105263	0.409091	0.0294118	0.0208333	38.8636	0.708333
TGME49_355090:47	1	5	6	149	T	TGME49_355090	47	95	48	39	196	0.0208333	0.122449	0.175	0.761421	5.87755	4.35098
TGME49_355140:40	1	11	2	123	T	TGME49_355140	40	495	35	637	1662	0.00403226	0.333333	0.00470219	0.074564	82.6667	15.8573
TGME49_355140:45	0	16	7	0	T	TGME49_355140	45	522	52	677	1662	0.00191205	0.320755	0.0117994	0.000601323	167.755	0.0509621
TGME49_355250:38	5	23	4	662	T	TGME49_355250	38	728	118	1287	3295	0.00823045	0.201681	0.00388199	0.201153	24.5042	51.817
TGME49_202320:26	17	181	17	387	T	TGME49_202320	26	984	353	276	976	0.0182741	0.514124	0.0649819	0.397134	28.134	6.11145
TGME49_207365:39	198	2766	155	3554	T	TGME49_207365	39	5796	3414	2615	4968	0.0343281	0.810249	0.059633	0.715436	23.6031	11.9973
TGME49_207810:43	46	474	27	322	T	TGME49_207810	43	3540	1230	1519	1356	0.0132731	0.385865	0.0184211	0.238025	29.0712	12.9214
TGME49_208480:43	38	454	17	344	T	TGME49_208480	43	3593	1222	1492	1394	0.0108514	0.372036	0.0120563	0.247312	34.2845	20.5131
TGME49_214450:20	10	5	5	14	T	TGME49_214450	20	250	11	40	31	0.0438247	0.5	0.146341	0.46875	11.4091	3.20312
TGME49_218440:13	12	54	17	141	T	TGME49_218440	13	159	97	181	507	0.08125	0.561224	0.0989011	0.279528	6.90738	2.82633
TGME49_218440:25	30	229	34	412	T	TGME49_218440	25	403	514	398	1322	0.0767327	0.446602	0.0877193	0.312169	5.82023	3.55873
TGME49_218440:26	67	652	78	1130	T	TGME49_218440	26	470	1166	476	2452	0.144374	0.559554	0.165618	0.461068	3.87574	2.78392
TGME49_220550:26	94	171	57	564	T	TGME49_220550	26	1789	313	924	1005	0.0530726	0.547771	0.0627027	0.56163	10.3212	8.95703
TGME49_220620:39	195	2636	157	3620	T	TGME49_220620	39	1935	2855	944	3984	0.10124	0.923319	0.167196	0.908657	9.12013	5.43469
TGME49_221290:39	52	520	18	529	T	TGME49_221290	39	876	791	572	1171	0.0604333	0.657828	0.0331588	0.452218	10.8852	13.638
TGME49_222680:39	130	758	71	593	T	TGME49_222680	39	4316	1873	2556	2211	0.0303451	0.405016	0.028158	0.268535	13.347	9.53673
TGME49_246680:24	5	16	7	41	T	TGME49_246680	24	41	26	26	107	0.142857	0.62963	0.296296	0.388889	4.40741	1.3125
TGME49_251700:27	438	784	171	848	T	TGME49_251700	27	7876	1966	3794	3052	0.0557319	0.399085	0.0453228	0.278087	7.1608	6.1357
TGME49_253840:27	0	15	2	29	T	TGME49_253840	27	42	23	40	59	0.0232558	0.666667	0.0731707	0.5	28.6667	6.83333
TGME49_257140:27	11	14	9	16	T	TGME49_257140	27	407	78	322	202	0.0294118	0.189873	0.0309598	0.0837438	6.4557	2.70493
TGME49_262568:20	11	8	1	9	T	TGME49_262568	20	282	10	37	17	0.0424028	0.818182	0.0526316	0.555556	19.2955	10.5556
TGME49_262568:21	30	10	11	27	T	TGME49_262568	21	312	20	48	44	0.0990415	0.52381	0.244898	0.622222	5.28879	2.54074
TGME49_262568:28	33	233	18	249	T	TGME49_262568	28	362	262	70	304	0.0936639	0.889734	0.267606	0.819672	9.49922	3.06299
TGME49_271891:26	7	62	7	173	T	TGME49_271891	26	237	152	88	348	0.0336134	0.411765	0.0898876	0.498567	12.25	5.54656
TGME49_272220:13	0	22	2	81	T	TGME49_272220	13	3	24	4	88	0.25	0.92	0.6	0.921348	3.68	1.53558
TGME49_275340:39	204	2285	156	3517	T	TGME49_275340	39	1135	2470	790	4012	0.180458	0.925132	0.198483	0.876651	5.12658	4.41676
TGME49_277960:25	0	12	3	28	T	TGME49_277960	25	38	29	26	73	0.025641	0.433333	0.148148	0.391892	16.9	2.64527
TGME49_288760:13	2	8	0	10	T	TGME49_288760	13	21	10	15	30	0.136364	0.818182	0.0625	0.354839	6	5.67742
TGME49_288760:24	5	21	5	23	T	TGME49_288760	24	57	56	30	80	0.103448	0.385965	0.193548	0.296296	3.73099	1.53086
TGME49_290320:39	89	201	33	298	T	TGME49_290320	39	2651	383	1045	615	0.0339367	0.526042	0.0325048	0.48539	15.5007	14.9329
TGME49_290320:40	44	513	24	512	T	TGME49_290320	40	2695	896	1069	1127	0.0166914	0.573021	0.0233645	0.454787	34.3303	19.4649
TGME49_293750:28	273	262	145	446	T	TGME49_293750	28	2290	582	1190	1145	0.119598	0.451115	0.122586	0.390052	3.77191	3.18187
TGME49_293750:34	499	1272	316	812	T	TGME49_293750	34	4222	2467	2085	2530	0.118399	0.515802	0.151965	0.321217	4.35647	2.11375
TGME49_308910:33	137	270	70	203	T	TGME49_308910	33	4528	2118	3368	2705	0.0304703	0.127891	0.0210745	0.075388	4.19722	3.57721
TGME49_311190:13	9	9	1	28	T	TGME49_311190	13	91	11	22	48	0.108696	0.833333	0.0869565	0.591837	7.66667	6.80612
TGME49_311190:26	8	88	6	156	T	TGME49_311190	26	320	189	96	345	0.0280374	0.468421	0.0721649	0.453757	16.707	6.28778
TGME49_315650:27	29	65	12	87	T	TGME49_315650	27	409	139	240	283	0.0731707	0.471429	0.0539419	0.309859	6.44286	5.74431
TGME49_321350:41	4	159	4	252	T	TGME49_321350	41	51	167	35	269	0.0961538	0.952381	0.138889	0.937037	9.90476	6.74667
TGME49_355110:29	0	5	1	6	T	TGME49_355110	29	12	9	20	19	0.0769231	0.6	0.0952381	0.35	7.8	3.675

## Sheet: brady_pus1_psis
site	wt_noCMC.x_signal	wt_CMC.x_signal	mut_noCMC.x_signal	mut_CMC.x_signal	nt.x	gene.x	pos.x	wt_noCMC_depth.x	wt_CMC_depth.x	mut_noCMC_depth.x	mut_CMC_depth.x	wt_noCMC_pen.x	wt_CMC_pen.x	mut_noCMC_pen.x	mut_CMC_pen.x	wt_pen_ratio.x	mut_pen_ratio.x	wt_noCMC.y_signal	wt_CMC.y_signal	mut_noCMC.y_signal	mut_CMC.y_signal	nt.y	gene.y	pos.y	wt_noCMC_depth.y	wt_CMC_depth.y	mut_noCMC_depth.y	mut_CMC_depth.y	wt_noCMC_pen.y	wt_CMC_pen.y	mut_noCMC_pen.y	mut_CMC_pen.y	wt_pen_ratio.y	mut_pen_ratio.y	binom
TGME49_262568:28	12	21	15	0	T	TGME49_262568	28	330	135	136	533	0.0392749	0.161765	0.116788	0.00187266	4.11878	0.0160346	33	233	18	249	T	TGME49_262568	28	362	262	70	304	0.0936639	0.889734	0.267606	0.819672	9.49922	3.06299	6.67364e-90
