# Supplementary material
Source: HighWire-hosted journal article supplement (doi:10.1101/rna.062794.117)
Supplement: Supplemental_Table_S3.xlsx [file Supplemental_Table_S3.xlsx]

## Sheet: tachy_mrna_psis
full	wt_noCMC.x_signal	wt_CMC.x_signal	mut_noCMC.x_signal	mut_CMC.x_signal	nt.x	transcript.x	pos.x	wt_noCMC_depth.x	wt_CMC_depth.x	mut_noCMC_depth.x	mut_CMC_depth.x	wt_noCMC_pen.x	wt_CMC_pen.x	mut_noCMC_pen.x	mut_CMC_pen.x	wt_pen_ratio.x	mut_pen_ratio.x	wt_noCMC.y_signal	wt_CMC.y_signal	mut_noCMC.y_signal	mut_CMC.y_signal	nt.y	transcript	pos.y	wt_noCMC_depth.y	wt_CMC_depth.y	mut_noCMC_depth.y	mut_CMC_depth.y	wt_noCMC_pen.y	wt_CMC_pen.y	mut_noCMC_pen.y	mut_CMC_pen.y	wt_pen_ratio.y	mut_pen_ratio.y
TGME49_200010:2018	0	5	0	2	T	TGME49_200010	2018	12	10	4	5	0.0769231	0.545455	0.2	0.5	7.09091	2.5	0	37	0	21	T	TGME49_200010	2018	65	111	34	49	0.0151515	0.339286	0.0285714	0.44	22.3929	15.4
TGME49_200290:883	0	7	0	0	T	TGME49_200290	883	58	32	11	30	0.0169492	0.242424	0.0833333	0.0322581	14.303	0.387097	0	10	0	3	T	TGME49_200290	883	16	46	1	29	0.0588235	0.234043	0.5	0.133333	3.97872	0.266667
TGME49_200310:250	0	7	0	0	T	TGME49_200310	250	30	18	4	20	0.0322581	0.421053	0.2	0.047619	13.0526	0.238095	0	10	0	16	T	TGME49_200310	250	87	48	58	40	0.0113636	0.22449	0.0169492	0.414634	19.7551	24.4634
TGME49_200310:690	0	5	0	8	T	TGME49_200310	690	35	16	7	30	0.0277778	0.352941	0.125	0.290323	12.7059	2.32258	0	8	0	0	T	TGME49_200310	690	6	10	20	113	0.142857	0.818182	0.047619	0.00877193	5.72727	0.184211
TGME49_200360:129	0	9	0	15	T	TGME49_200360	129	40	27	33	94	0.0243902	0.357143	0.0294118	0.168421	14.6429	5.72632	0	10	0	0	T	TGME49_200360	129	19	35	8	7	0.05	0.305556	0.111111	0.125	6.11111	1.125
TGME49_200360:413	0	12	0	14	T	TGME49_200360	413	37	66	20	122	0.0263158	0.19403	0.047619	0.121951	7.37313	2.56098	0	22	0	12	T	TGME49_200360	413	134	133	29	99	0.00740741	0.171642	0.0333333	0.13	23.1716	3.9
TGME49_200360:477	0	25	0	11	T	TGME49_200360	477	25	82	65	108	0.0384615	0.313253	0.0151515	0.110092	8.14458	7.26606	0	39	0	0	T	TGME49_200360	477	231	165	38	167	0.00431035	0.240964	0.025641	0.00595238	55.9036	0.232143
TGME49_200360:964	0	14	10	15	T	TGME49_200360	964	91	95	39	86	0.0108696	0.15625	0.275	0.183908	14.375	0.668757	0	19	0	0	T	TGME49_200360	964	113	122	37	27	0.00877193	0.162602	0.0263158	0.0357143	18.5366	1.35714
TGME49_201380:1391	0	8	1	3	T	TGME49_201380	1391	34	24	1	12	0.0285714	0.36	1	0.307692	12.6	0.307692	0	7	0	0	T	TGME49_201380	1391	55	56	1	28	0.0178571	0.140351	0.5	0.0344828	7.85965	0.0689655
TGME49_201380:2011	0	6	0	6	T	TGME49_201380	2011	15	20	10	37	0.0625	0.333333	0.0909091	0.184211	5.33333	2.02632	4	14	0	0	T	TGME49_201380	2011	81	52	15	24	0.0609756	0.283019	0.0625	0.04	4.64151	0.64
TGME49_201390:1141	0	26	0	7	T	TGME49_201390	1141	64	126	42	72	0.0153846	0.212598	0.0232558	0.109589	13.8189	4.71233	10	64	0	40	T	TGME49_201390	1141	387	311	234	149	0.0283505	0.208333	0.00425532	0.273333	7.34848	64.2333
TGME49_201390:155	0	25	12	24	T	TGME49_201390	155	90	112	43	154	0.010989	0.230088	0.295455	0.16129	20.9381	0.545906	0	44	0	30	T	TGME49_201390	155	178	280	76	179	0.00558659	0.160142	0.012987	0.172222	28.6655	13.2611
TGME49_201390:1560	0	18	12	4	T	TGME49_201390	1560	113	124	67	162	0.00877193	0.152	0.191176	0.0306748	17.328	0.160453	3	68	0	0	T	TGME49_201390	1560	402	321	190	167	0.00992556	0.214286	0.0052356	0.00595238	21.5893	1.1369
TGME49_201390:491	0	23	0	3	T	TGME49_201390	491	117	109	111	135	0.00847458	0.218182	0.00892857	0.0294118	25.7455	3.29412	12	48	34	22	T	TGME49_201390	491	491	359	336	383	0.0264228	0.136111	0.103858	0.0598958	5.15128	0.576711
TGME49_201390:558	0	9	6	0	T	TGME49_201390	558	21	57	23	47	0.0454545	0.172414	0.291667	0.0208333	3.7931	0.0714286	18	83	0	0	T	TGME49_201390	558	434	338	184	227	0.0436782	0.247788	0.00540541	0.00438597	5.67303	0.811404
TGME49_201390:943	0	21	0	9	T	TGME49_201390	943	109	134	55	70	0.00909091	0.162963	0.0178571	0.140845	17.9259	7.88732	11	32	0	0	T	TGME49_201390	943	265	121	39	68	0.0451128	0.270492	0.025	0.0144928	5.9959	0.57971
TGME49_201680:2036	0	6	4	1	T	TGME49_201680	2036	21	14	4	6	0.0454545	0.466667	1	0.285714	10.2667	0.285714	0	10	0	17	T	TGME49_201680	2036	6	21	39	17	0.142857	0.5	0.025	1	3.5	40
TGME49_201780:1873	0	32	2	5	T	TGME49_201780	1873	143	158	44	129	0.00694444	0.207547	0.0666667	0.0461538	29.8868	0.692308	14	50	9	51	T	TGME49_201780	1873	389	375	266	259	0.0384615	0.135638	0.0374532	0.2	3.5266	5.34
TGME49_201780:292	0	23	5	16	T	TGME49_201780	292	81	174	70	139	0.0121951	0.137143	0.084507	0.121429	11.2457	1.4369	10	74	1	24	T	TGME49_201780	292	415	321	148	244	0.0264423	0.232919	0.0134228	0.102041	8.80858	7.60204
TGME49_201780:338	0	27	0	16	T	TGME49_201780	338	123	162	60	142	0.00806452	0.171779	0.0163934	0.118881	21.3006	7.25175	3	97	0	82	T	TGME49_201780	338	405	305	221	431	0.00985222	0.320261	0.0045045	0.19213	32.5065	42.6528
TGME49_201780:37	0	16	15	16	T	TGME49_201780	37	33	118	69	200	0.0294118	0.142857	0.228571	0.0845771	4.85714	0.370025	9	57	7	81	T	TGME49_201780	37	207	276	77	182	0.0480769	0.209386	0.102564	0.448087	4.35523	4.36885
TGME49_201780:371	0	20	11	24	T	TGME49_201780	371	106	159	34	149	0.00934579	0.13125	0.342857	0.166667	14.0437	0.486111	11	53	26	49	T	TGME49_201780	371	348	371	159	181	0.034384	0.145161	0.16875	0.274725	4.22177	1.628
TGME49_201785:383	0	21	3	18	T	TGME49_201785	383	86	94	50	139	0.0114943	0.231579	0.0784314	0.135714	20.1474	1.73036	0	41	0	11	T	TGME49_201785	383	281	179	96	251	0.0035461	0.233333	0.0103093	0.047619	65.8	4.61905
TGME49_201785:398	0	14	6	18	T	TGME49_201785	398	87	119	65	185	0.0113636	0.125	0.106061	0.102151	11	0.963134	0	25	0	41	T	TGME49_201785	398	248	161	82	228	0.00401606	0.160494	0.0120482	0.183406	39.963	15.2227
TGME49_201785:481	0	18	8	19	T	TGME49_201785	481	126	147	99	200	0.00787402	0.128378	0.09	0.0995025	16.3041	1.10558	1	28	0	0	T	TGME49_201785	481	297	237	156	119	0.00671141	0.121849	0.00636943	0.00833333	18.1555	1.30833
TGME49_201785:522	0	8	0	0	T	TGME49_201785	522	105	64	43	83	0.00943396	0.138462	0.0227273	0.0119048	14.6769	0.52381	5	40	56	11	T	TGME49_201785	522	87	117	118	122	0.0681818	0.347458	0.478992	0.097561	5.09605	0.20368
TGME49_201840:1275	0	5	0	0	T	TGME49_201840	1275	46	33	2	6	0.0212766	0.176471	0.333333	0.142857	8.29412	0.428571	0	25	8	19	T	TGME49_201840	1275	47	47	9	45	0.0208333	0.541667	0.9	0.434783	26	0.483092
TGME49_201860:1359	0	8	3	7	T	TGME49_201860	1359	67	45	40	48	0.0147059	0.195652	0.097561	0.163265	13.3043	1.67347	8	46	23	70	T	TGME49_201860	1359	285	276	51	164	0.0314685	0.169675	0.461538	0.430303	5.3919	0.932323
TGME49_201860:1376	0	9	5	1	T	TGME49_201860	1376	88	78	28	109	0.011236	0.126582	0.206897	0.0181818	11.2658	0.0878788	1	36	0	5	T	TGME49_201860	1376	246	267	108	184	0.00809717	0.13806	0.00917431	0.0324324	17.0504	3.53514
TGME49_201860:1432	0	15	0	15	T	TGME49_201860	1432	112	90	39	112	0.00884956	0.175824	0.025	0.141593	19.8681	5.66372	0	15	0	1	T	TGME49_201860	1432	75	95	26	33	0.0131579	0.166667	0.037037	0.0588235	12.6667	1.58824
TGME49_201860:774	0	20	2	2	T	TGME49_201860	774	21	93	34	76	0.0454545	0.223404	0.0857143	0.038961	4.91489	0.454545	52	197	0	229	T	TGME49_201860	774	372	314	371	470	0.142091	0.628571	0.00268817	0.488323	4.42372	181.656
TGME49_201860:874	0	33	3	34	T	TGME49_201860	874	84	122	38	125	0.0117647	0.276423	0.102564	0.277778	23.4959	2.70833	8	27	0	55	T	TGME49_201860	874	337	198	97	192	0.0266272	0.140704	0.0102041	0.290155	5.2842	28.4352
TGME49_201860:875	0	23	2	3	T	TGME49_201860	875	84	144	40	128	0.0117647	0.165517	0.0731707	0.0310078	14.069	0.423773	17	44	0	0	T	TGME49_201860	875	349	242	97	192	0.0514286	0.185185	0.0102041	0.00518135	3.60082	0.507772
TGME49_201860:979	0	21	0	4	T	TGME49_201860	979	20	75	33	40	0.047619	0.289474	0.0294118	0.121951	6.07895	4.14634	1	48	0	41	T	TGME49_201860	979	304	220	251	214	0.00655738	0.221719	0.00396825	0.195349	33.8122	49.2279
TGME49_201880:1165	0	5	0	1	T	TGME49_201880	1165	19	26	5	13	0.05	0.222222	0.166667	0.142857	4.44444	0.857143	0	28	0	5	T	TGME49_201880	1165	29	79	6	19	0.0333333	0.3625	0.142857	0.3	10.875	2.1
TGME49_201880:542	0	6	0	7	T	TGME49_201880	542	11	19	2	24	0.0833333	0.35	0.333333	0.32	4.2	0.96	0	13	0	3	T	TGME49_201880	542	56	58	31	32	0.0175439	0.237288	0.03125	0.121212	13.5254	3.87879
TGME49_202030:5626	0	6	0	0	T	TGME49_202030	5626	14	18	3	1	0.0666667	0.368421	0.25	0.5	5.52632	2	0	10	0	0	T	TGME49_202030	5626	20	22	44	20	0.047619	0.478261	0.0222222	0.047619	10.0435	2.14286
TGME49_202500:1776	0	9	1	7	T	TGME49_202500	1776	13	21	12	48	0.0714286	0.454545	0.153846	0.163265	6.36364	1.06122	0	7	0	20	T	TGME49_202500	1776	115	59	41	61	0.00862069	0.133333	0.0238095	0.33871	15.4667	14.2258
TGME49_202620:1039	0	9	0	0	T	TGME49_202620	1039	17	47	13	27	0.0555556	0.208333	0.0714286	0.0357143	3.75	0.5	8	15	2	10	T	TGME49_202620	1039	198	89	46	83	0.0452261	0.177778	0.0638298	0.130952	3.93086	2.05159
TGME49_202620:1150	0	6	0	5	T	TGME49_202620	1150	40	44	8	36	0.0243902	0.155556	0.111111	0.162162	6.37778	1.45946	0	12	0	12	T	TGME49_202620	1150	127	83	71	77	0.0078125	0.154762	0.0138889	0.166667	19.8095	12
TGME49_202620:1514	0	11	6	4	T	TGME49_202620	1514	40	51	29	27	0.0243902	0.230769	0.233333	0.178571	9.46154	0.765306	0	21	0	18	T	TGME49_202620	1514	181	135	137	145	0.00549451	0.161765	0.00724638	0.130137	29.4412	17.9589
TGME49_202620:1698	0	20	0	15	T	TGME49_202620	1698	13	52	22	38	0.0714286	0.396226	0.0434783	0.410256	5.54717	9.4359	0	26	0	16	T	TGME49_202620	1698	96	112	38	118	0.0103093	0.238938	0.025641	0.142857	23.177	5.57143
TGME49_202620:1991	0	5	0	5	T	TGME49_202620	1991	37	38	6	32	0.0263158	0.153846	0.142857	0.181818	5.84615	1.27273	0	21	0	0	T	TGME49_202620	1991	66	105	26	9	0.0149254	0.207547	0.037037	0.1	13.9057	2.7
TGME49_202620:2400	0	7	1	1	T	TGME49_202620	2400	38	31	6	31	0.025641	0.25	0.285714	0.0625	9.75	0.21875	0	12	0	0	T	TGME49_202620	2400	75	62	65	33	0.0131579	0.206349	0.0151515	0.0294118	15.6825	1.94118
TGME49_202620:2604	0	7	0	9	T	TGME49_202620	2604	28	60	14	66	0.0344828	0.131148	0.0666667	0.149254	3.80328	2.23881	0	19	0	0	T	TGME49_202620	2604	116	129	106	114	0.00854701	0.153846	0.00934579	0.00869565	18	0.930435
TGME49_202620:701	0	11	0	6	T	TGME49_202620	701	26	36	13	28	0.037037	0.324324	0.0714286	0.241379	8.75676	3.37931	0	17	0	54	T	TGME49_202620	701	88	77	50	65	0.011236	0.230769	0.0196078	0.833333	20.5385	42.5
TGME49_202620:976	0	20	0	22	T	TGME49_202620	976	23	49	6	42	0.0416667	0.42	0.142857	0.534884	10.08	3.74419	0	24	0	1	T	TGME49_202620	976	60	48	3	13	0.0163934	0.510204	0.25	0.142857	31.1224	0.571429
TGME49_202830:1761	0	9	1	3	T	TGME49_202830	1761	11	31	10	30	0.0833333	0.3125	0.181818	0.129032	3.75	0.709677	0	5	0	0	T	TGME49_202830	1761	95	46	1	13	0.0104167	0.12766	0.5	0.0714286	12.2553	0.142857
TGME49_202830:2286	0	11	8	4	T	TGME49_202830	2286	40	46	18	57	0.0243902	0.255319	0.473684	0.0862069	10.4681	0.181992	0	5	0	0	T	TGME49_202830	2286	20	13	25	7	0.047619	0.428571	0.0384615	0.125	9	3.25
TGME49_202840:1068	0	6	0	0	T	TGME49_202840	1068	62	29	8	15	0.015873	0.233333	0.111111	0.0625	14.7	0.5625	0	7	0	13	T	TGME49_202840	1068	49	38	13	28	0.02	0.205128	0.0714286	0.482759	10.2564	6.75862
TGME49_203060:2132	0	12	0	17	T	TGME49_203060	2132	56	66	32	76	0.0175439	0.19403	0.030303	0.233766	11.0597	7.71429	0	6	0	0	T	TGME49_203060	2132	81	56	87	83	0.0121951	0.122807	0.0113636	0.0119048	10.0702	1.04762
TGME49_203060:2218	0	11	0	4	T	TGME49_203060	2218	85	56	3	45	0.0116279	0.210526	0.25	0.108696	18.1053	0.434783	0	11	2	0	T	TGME49_203060	2218	63	65	54	59	0.015625	0.181818	0.0545455	0.0166667	11.6364	0.305556
TGME49_203290:1531	0	20	5	4	T	TGME49_203290	1531	65	158	67	129	0.0151515	0.132075	0.0882353	0.0384615	8.71698	0.435897	1	37	0	0	T	TGME49_203290	1531	398	238	206	159	0.00501253	0.158996	0.00483092	0.00625	31.7197	1.29375
TGME49_203290:1685	0	20	5	15	T	TGME49_203290	1685	161	84	42	104	0.00617284	0.247059	0.139535	0.152381	40.0235	1.09206	0	5	0	0	T	TGME49_203290	1685	347	43	41	25	0.00287356	0.136364	0.0238095	0.0384615	47.4545	1.61538
TGME49_203290:1689	0	20	7	20	T	TGME49_203290	1689	122	97	45	118	0.00813008	0.214286	0.173913	0.176471	26.3571	1.01471	0	8	0	0	T	TGME49_203290	1689	277	53	41	50	0.00359712	0.166667	0.0238095	0.0196078	46.3333	0.823529
TGME49_203290:1723	0	23	3	7	T	TGME49_203290	1723	69	157	37	72	0.0142857	0.151899	0.105263	0.109589	10.6329	1.0411	4	30	0	27	T	TGME49_203290	1723	73	79	45	43	0.0675676	0.3875	0.0217391	0.636364	5.735	29.2727
TGME49_203290:2018	0	27	3	10	T	TGME49_203290	2018	141	128	28	75	0.00704225	0.217054	0.137931	0.144737	30.8217	1.04934	11	90	0	67	T	TGME49_203290	2018	497	394	46	293	0.0240964	0.23038	0.0212766	0.231293	9.56076	10.8707
TGME49_203310:1964	0	16	0	4	T	TGME49_203310	1964	80	140	20	73	0.0123457	0.120567	0.047619	0.0675676	9.76596	1.41892	1	45	24	108	T	TGME49_203310	1964	660	273	504	670	0.00302572	0.167883	0.0495049	0.162444	55.4854	3.28137
TGME49_203310:2711	1	67	5	69	T	TGME49_203310	2711	110	198	220	287	0.018018	0.341709	0.0271493	0.243056	18.9648	8.95255	81	291	42	148	T	TGME49_203310	2711	2273	1831	988	1152	0.0360598	0.159389	0.0434783	0.129228	4.42012	2.97225
TGME49_203540:2831	0	9	0	1	T	TGME49_203540	2831	29	21	3	20	0.0333333	0.454545	0.25	0.0952381	13.6364	0.380952	0	11	0	0	T	TGME49_203540	2831	14	31	4	10	0.0666667	0.375	0.2	0.0909091	5.625	0.454545
TGME49_203630:11	0	9	0	7	T	TGME49_203630	11	48	46	9	33	0.0204082	0.212766	0.1	0.235294	10.4255	2.35294	18	65	0	27	T	TGME49_203630	11	224	220	39	114	0.0844444	0.298643	0.025	0.243478	3.53656	9.73913
TGME49_203630:126	0	41	5	32	T	TGME49_203630	126	67	150	26	98	0.0147059	0.278146	0.222222	0.333333	18.9139	1.5	1	73	0	0	T	TGME49_203630	126	241	390	26	177	0.00826446	0.189258	0.037037	0.00561798	22.9003	0.151685
TGME49_203720:351	0	16	0	3	T	TGME49_203720	351	103	52	2	19	0.00961539	0.320755	0.333333	0.2	33.3585	0.6	0	24	0	0	T	TGME49_203720	351	98	118	74	69	0.010101	0.210084	0.0133333	0.0142857	20.7983	1.07143
TGME49_203720:536	0	7	0	0	T	TGME49_203720	536	36	36	5	12	0.027027	0.216216	0.166667	0.0769231	8	0.461538	0	31	0	0	T	TGME49_203720	536	272	256	16	109	0.003663	0.124514	0.0588235	0.00909091	33.9922	0.154545
TGME49_204020:1003	0	31	0	19	T	TGME49_204020	1003	103	142	34	101	0.00961539	0.223776	0.0285714	0.196078	23.2727	6.86275	9	92	0	48	T	TGME49_204020	1003	694	670	101	182	0.0143885	0.138599	0.00980392	0.26776	9.63264	27.3115
TGME49_204020:243	5	50	0	10	T	TGME49_204020	243	133	163	21	75	0.0447761	0.310976	0.0454545	0.144737	6.94512	3.18421	8	72	17	20	T	TGME49_204020	243	554	558	211	272	0.0162162	0.13059	0.0849057	0.0769231	8.05307	0.905983
TGME49_204020:356	0	12	0	29	T	TGME49_204020	356	57	48	29	58	0.0172414	0.265306	0.0333333	0.508475	15.3878	15.2542	30	128	28	139	T	TGME49_204020	356	851	953	179	463	0.036385	0.13522	0.161111	0.301724	3.71637	1.87277
TGME49_204020:433	2	53	3	54	T	TGME49_204020	433	116	165	52	159	0.025641	0.325301	0.0754717	0.34375	12.6867	4.55469	41	139	35	27	T	TGME49_204020	433	689	628	169	294	0.0608696	0.222576	0.211765	0.0949153	3.6566	0.448211
TGME49_204020:794	0	25	7	18	T	TGME49_204020	794	50	105	65	123	0.0196078	0.245283	0.121212	0.153226	12.5094	1.26411	38	186	0	85	T	TGME49_204020	794	734	713	159	416	0.0530612	0.261905	0.00625	0.206235	4.9359	32.9976
TGME49_204050:1791	0	8	5	1	T	TGME49_204050	1791	98	45	88	79	0.010101	0.195652	0.0674157	0.025	19.3696	0.370833	9	35	10	24	T	TGME49_204050	1791	475	260	91	145	0.0210084	0.137931	0.119565	0.171233	6.56552	1.43213
TGME49_204050:1886	0	25	14	40	T	TGME49_204050	1886	81	103	68	139	0.0121951	0.25	0.217391	0.292857	20.5	1.34714	22	64	10	8	T	TGME49_204050	1886	381	276	103	138	0.0602094	0.234657	0.105769	0.0647482	3.89735	0.612165
TGME49_204050:2284	0	39	0	42	T	TGME49_204050	2284	71	124	45	161	0.0138889	0.32	0.0217391	0.265432	23.04	12.2099	13	41	0	10	T	TGME49_204050	2284	163	130	96	75	0.0853659	0.320611	0.0103093	0.144737	3.75573	14.0395
TGME49_204050:2676	1	37	0	12	T	TGME49_204050	2676	94	151	113	128	0.0210526	0.25	0.00877193	0.100775	11.875	11.4884	5	76	0	118	T	TGME49_204050	2676	119	115	58	143	0.05	0.663793	0.0169492	0.826389	13.2759	48.7569
TGME49_204050:2681	1	123	6	42	T	TGME49_204050	2681	37	361	130	401	0.0526316	0.342541	0.0534351	0.106965	6.50829	2.00178	11	139	1	85	T	TGME49_204050	2681	174	281	59	274	0.0685714	0.496454	0.0333333	0.312727	7.23995	9.38182
TGME49_204050:3020	10	51	8	59	T	TGME49_204050	3020	128	156	58	250	0.0852713	0.33121	0.152542	0.239044	3.88419	1.56707	0	22	0	0	T	TGME49_204050	3020	184	136	64	88	0.00540541	0.167883	0.0153846	0.011236	31.0584	0.730337
TGME49_204050:3107	0	24	9	18	T	TGME49_204050	3107	79	114	67	90	0.0125	0.217391	0.147059	0.208791	17.3913	1.41978	1	12	0	31	T	TGME49_204050	3107	44	71	50	40	0.0444444	0.180556	0.0196078	0.780488	4.0625	39.8049
TGME49_204050:3229	0	34	1	55	T	TGME49_204050	3229	144	135	72	149	0.00689655	0.257353	0.0273973	0.373333	37.3162	13.6267	1	11	0	9	T	TGME49_204050	3229	135	57	49	26	0.0147059	0.206897	0.02	0.37037	14.069	18.5185
TGME49_204050:430	0	33	0	21	T	TGME49_204050	430	109	173	107	198	0.00909091	0.195402	0.00925926	0.110553	21.4943	11.9397	11	31	0	2	T	TGME49_204050	430	209	120	73	45	0.0571429	0.264463	0.0135135	0.0652174	4.6281	4.82609
TGME49_204050:521	0	15	0	1	T	TGME49_204050	521	110	90	40	93	0.00900901	0.175824	0.0243902	0.0212766	19.5165	0.87234	0	7	0	25	T	TGME49_204050	521	39	50	40	120	0.025	0.156863	0.0243902	0.214876	6.27451	8.80992
TGME49_204130:3109	1	12	1	4	T	TGME49_204130	3109	52	42	28	20	0.0377358	0.302326	0.0689655	0.238095	8.01163	3.45238	0	10	0	0	T	TGME49_204130	3109	29	40	27	40	0.0333333	0.268293	0.0357143	0.0243902	8.04878	0.682927
TGME49_204130:4078	0	5	0	7	T	TGME49_204130	4078	24	30	4	25	0.04	0.193548	0.2	0.307692	4.83871	1.53846	0	6	0	2	T	TGME49_204130	4078	50	32	51	51	0.0196078	0.212121	0.0192308	0.0576923	10.8182	3
TGME49_204130:4319	0	11	0	0	T	TGME49_204130	4319	10	29	7	19	0.0909091	0.4	0.125	0.05	4.4	0.4	0	8	0	0	T	TGME49_204130	4319	27	17	30	63	0.0357143	0.5	0.0322581	0.015625	14	0.484375
TGME49_204340:2756	0	10	0	0	T	TGME49_204340	2756	37	51	7	32	0.0263158	0.211538	0.125	0.030303	8.03846	0.242424	0	17	0	0	T	TGME49_204340	2756	97	53	13	42	0.0102041	0.333333	0.0714286	0.0232558	32.6667	0.325581
TGME49_204400:1589	0	7	0	0	T	TGME49_204400	1589	35	20	3	12	0.0277778	0.380952	0.25	0.0769231	13.7143	0.307692	0	19	0	8	T	TGME49_204400	1589	23	36	19	18	0.0416667	0.540541	0.05	0.473684	12.973	9.47368
TGME49_204530:1115	0	23	0	20	T	TGME49_204530	1115	32	79	44	95	0.030303	0.3	0.0222222	0.21875	9.9	9.84375	0	27	0	0	T	TGME49_204530	1115	328	223	256	145	0.00303951	0.125	0.00389105	0.00684931	41.125	1.76027
TGME49_204530:1430	0	66	11	49	T	TGME49_204530	1430	128	237	47	224	0.00775194	0.281513	0.25	0.222222	36.3151	0.888889	2	34	0	1	T	TGME49_204530	1430	154	223	72	131	0.0193548	0.15625	0.0136986	0.0151515	8.07292	1.10606
TGME49_204530:1829	0	52	0	34	T	TGME49_204530	1829	144	322	140	218	0.00689655	0.164087	0.0070922	0.159817	23.7926	22.5342	2	40	0	52	T	TGME49_204530	1829	447	211	153	278	0.00669643	0.193396	0.00649351	0.189964	28.8805	29.2545
TGME49_204530:1909	0	14	9	10	T	TGME49_204530	1909	149	110	61	116	0.00666667	0.135135	0.16129	0.0940171	20.2703	0.582906	0	10	0	0	T	TGME49_204530	1909	76	76	11	59	0.012987	0.142857	0.0833333	0.0166667	11	0.2
TGME49_204530:2345	0	10	3	8	T	TGME49_204530	2345	27	25	3	23	0.0357143	0.423077	1	0.375	11.8462	0.375	2	10	0	0	T	TGME49_204530	2345	84	74	16	25	0.0352941	0.146667	0.0588235	0.0384615	4.15556	0.653846
TGME49_204530:746	0	11	0	4	T	TGME49_204530	746	91	99	70	140	0.0108696	0.12	0.0140845	0.035461	11.04	2.51773	8	20	19	0	T	TGME49_204530	746	237	153	179	138	0.0378151	0.136364	0.111111	0.00719425	3.60606	0.0647482
TGME49_205170:536	0	8	12	12	T	TGME49_205170	536	45	25	15	27	0.0217391	0.346154	0.8125	0.464286	15.9231	0.571429	0	9	0	0	T	TGME49_205170	536	24	43	8	31	0.04	0.227273	0.111111	0.03125	5.68182	0.28125
TGME49_205250:1311	0	7	0	2	T	TGME49_205250	1311	51	34	19	46	0.0192308	0.228571	0.05	0.0638298	11.8857	1.2766	0	7	0	0	T	TGME49_205250	1311	13	25	1	84	0.0714286	0.307692	0.5	0.0117647	4.30769	0.0235294
TGME49_205250:1623	0	6	8	14	T	TGME49_205250	1623	24	38	25	51	0.04	0.179487	0.346154	0.288462	4.48718	0.833333	0	20	0	0	T	TGME49_205250	1623	153	151	117	113	0.00649351	0.138158	0.00847458	0.00877193	21.2763	1.03509
TGME49_205250:1725	0	6	0	7	T	TGME49_205250	1725	44	47	23	49	0.0222222	0.145833	0.0416667	0.16	6.5625	3.84	0	6	0	0	T	TGME49_205250	1725	50	52	6	1	0.0196078	0.132075	0.142857	0.5	6.73585	3.5
TGME49_205250:391	0	7	0	0	T	TGME49_205250	391	25	28	2	6	0.0384615	0.275862	0.333333	0.142857	7.17241	0.428571	0	14	0	16	T	TGME49_205250	391	38	60	43	73	0.025641	0.245902	0.0227273	0.22973	9.59016	10.1081
TGME49_205330:790	0	8	0	2	T	TGME49_205330	790	11	24	16	30	0.0833333	0.36	0.0588235	0.0967742	4.32	1.64516	3	11	1	0	T	TGME49_205330	790	61	28	5	74	0.0645161	0.413793	0.333333	0.0133333	6.41379	0.04
TGME49_205330:942	0	8	0	2	T	TGME49_205330	942	17	29	8	48	0.0555556	0.3	0.111111	0.0612245	5.4	0.55102	0	18	0	0	T	TGME49_205330	942	110	87	7	51	0.00900901	0.215909	0.125	0.0192308	23.9659	0.153846
TGME49_205340:288	0	23	5	17	T	TGME49_205340	288	72	94	59	87	0.0136986	0.252632	0.1	0.204545	18.4421	2.04545	15	128	0	188	T	TGME49_205340	288	450	431	210	447	0.0354767	0.298611	0.00473934	0.421875	8.4171	89.0156
TGME49_205350:3202	0	17	8	8	T	TGME49_205350	3202	44	33	16	19	0.0222222	0.529412	0.529412	0.45	23.8235	0.85	0	7	0	2	T	TGME49_205350	3202	14	10	13	6	0.0666667	0.727273	0.0714286	0.428571	10.9091	6
TGME49_205470:2401	0	5	0	5	T	TGME49_205470	2401	15	9	2	18	0.0625	0.6	0.333333	0.315789	9.6	0.947368	0	22	0	19	T	TGME49_205470	2401	252	134	71	66	0.00395257	0.17037	0.0138889	0.298507	43.1037	21.4925
TGME49_205470:3281	0	9	0	1	T	TGME49_205470	3281	22	34	12	33	0.0434783	0.285714	0.0769231	0.0588235	6.57143	0.764706	3	12	0	0	T	TGME49_205470	3281	151	96	77	106	0.0263158	0.134021	0.0128205	0.00934579	5.09278	0.728972
TGME49_205558:1178	0	8	0	6	T	TGME49_205558	1178	55	38	18	20	0.0178571	0.230769	0.0526316	0.333333	12.9231	6.33333	0	38	0	25	T	TGME49_205558	1178	83	199	43	110	0.0119048	0.195	0.0227273	0.234234	16.38	10.3063
TGME49_205558:1275	0	10	0	18	T	TGME49_205558	1275	50	53	34	79	0.0196078	0.203704	0.0285714	0.2375	10.3889	8.3125	0	25	0	0	T	TGME49_205558	1275	167	147	3	89	0.00595238	0.175676	0.25	0.0111111	29.5135	0.0444444
TGME49_205558:615	0	5	1	5	T	TGME49_205558	615	28	44	24	28	0.0344828	0.133333	0.08	0.206897	3.86667	2.58621	0	31	0	0	T	TGME49_205558	615	71	108	40	45	0.0138889	0.293578	0.0243902	0.0217391	21.1376	0.891304
TGME49_205558:805	0	11	6	15	T	TGME49_205558	805	41	40	14	32	0.0238095	0.292683	0.466667	0.484848	12.2927	1.03896	6	41	0	15	T	TGME49_205558	805	256	320	70	216	0.0272374	0.130841	0.0140845	0.0737327	4.80374	5.23502
TGME49_205650:965	0	7	0	0	T	TGME49_205650	965	14	11	1	8	0.0666667	0.666667	0.5	0.111111	10	0.222222	0	5	29	0	T	TGME49_205650	965	11	18	30	7	0.0833333	0.315789	0.967742	0.125	3.78947	0.129167
TGME49_205700:1342	0	6	0	0	T	TGME49_205700	1342	41	15	4	18	0.0238095	0.4375	0.2	0.0526316	18.375	0.263158	3	10	0	0	T	TGME49_205700	1342	75	39	136	52	0.0526316	0.275	0.00729927	0.0188679	5.225	2.58491
TGME49_205700:1384	0	6	0	0	T	TGME49_205700	1384	40	47	7	18	0.0243902	0.145833	0.125	0.0526316	5.97917	0.421053	13	25	0	15	T	TGME49_205700	1384	291	147	40	81	0.0479452	0.175676	0.0243902	0.195122	3.66409	8
TGME49_205700:1596	0	18	0	17	T	TGME49_205700	1596	86	87	19	79	0.0114943	0.215909	0.05	0.225	18.7841	4.5	30	133	0	54	T	TGME49_205700	1596	505	420	281	288	0.0612648	0.31829	0.0035461	0.190311	5.19531	53.6678
TGME49_205700:1927	0	15	0	7	T	TGME49_205700	1927	62	68	49	88	0.015873	0.231884	0.02	0.0898876	14.6087	4.49438	0	42	0	0	T	TGME49_205700	1927	275	260	87	241	0.00362319	0.164751	0.0113636	0.00413223	45.4713	0.363636
TGME49_207060:1260	0	9	2	12	T	TGME49_207060	1260	15	29	18	55	0.0625	0.333333	0.157895	0.232143	5.33333	1.47024	0	18	0	22	T	TGME49_207060	1260	109	54	188	78	0.00909091	0.345455	0.005291	0.291139	38	55.0253
TGME49_207440:459	0	10	0	6	T	TGME49_207440	459	23	56	26	38	0.0416667	0.192982	0.037037	0.179487	4.63158	4.84615	75	218	30	53	T	TGME49_207440	459	1563	1114	733	536	0.0485934	0.196413	0.0422343	0.100559	4.04196	2.38097
TGME49_207440:857	1	13	1	29	T	TGME49_207440	857	57	57	8	66	0.0344828	0.241379	0.222222	0.447761	7	2.01493	4	59	11	41	T	TGME49_207440	857	248	351	182	279	0.0200803	0.170455	0.0655738	0.15	8.48864	2.2875
TGME49_207440:947	0	12	0	2	T	TGME49_207440	947	21	23	5	9	0.0454545	0.541667	0.166667	0.3	11.9167	1.8	10	31	0	0	T	TGME49_207440	947	268	174	25	15	0.0408922	0.182857	0.0384615	0.0625	4.47169	1.625
TGME49_207840:46	0	10	0	18	T	TGME49_207840	46	31	33	1	47	0.03125	0.323529	0.5	0.395833	10.3529	0.791667	0	59	0	73	T	TGME49_207840	46	155	133	7	153	0.00641026	0.447761	0.125	0.480519	69.8507	3.84416
TGME49_207840:537	3	37	8	63	T	TGME49_207840	537	59	109	53	175	0.0666667	0.345455	0.166667	0.363636	5.18182	2.18182	0	17	0	52	T	TGME49_207840	537	280	135	119	68	0.00355872	0.132353	0.00833333	0.768116	37.1912	92.1739
TGME49_207840:549	0	27	0	26	T	TGME49_207840	549	142	125	65	182	0.00699301	0.222222	0.0151515	0.147541	31.7778	9.7377	15	36	71	30	T	TGME49_207840	549	317	122	187	88	0.0503145	0.300813	0.382979	0.348315	5.97866	0.909488
TGME49_208030:1158	4	35	2	39	T	TGME49_208030	1158	67	90	46	134	0.0735294	0.395604	0.0638298	0.296296	5.38022	4.64198	0	59	0	14	T	TGME49_208030	1158	338	354	59	312	0.00294985	0.169014	0.0166667	0.0479233	57.2958	2.8754
TGME49_208030:1370	0	21	0	3	T	TGME49_208030	1370	38	77	33	71	0.025641	0.282051	0.0294118	0.0555556	11	1.88889	2	29	54	0	T	TGME49_208030	1370	170	133	92	159	0.0175439	0.223881	0.591398	0.00625	12.7612	0.0105682
TGME49_208030:1858	1	8	3	15	T	TGME49_208030	1858	91	64	44	97	0.0217391	0.138462	0.0888889	0.163265	6.36923	1.83673	1	22	0	27	T	TGME49_208030	1858	406	177	92	245	0.004914	0.129213	0.0107527	0.113821	26.2949	10.5854
TGME49_208030:1979	0	16	6	20	T	TGME49_208030	1979	42	66	47	82	0.0232558	0.253731	0.145833	0.253012	10.9104	1.73494	26	123	1	74	T	TGME49_208030	1979	520	472	149	429	0.0518234	0.262156	0.0133333	0.174419	5.05865	13.0814
TGME49_208030:2056	0	7	0	1	T	TGME49_208030	2056	58	61	54	48	0.0169492	0.129032	0.0181818	0.0408163	7.6129	2.2449	9	72	0	105	T	TGME49_208030	2056	215	306	163	240	0.0462963	0.237785	0.00609756	0.439834	5.13616	72.1328
TGME49_208030:2282	0	11	1	6	T	TGME49_208030	2282	88	89	53	138	0.011236	0.133333	0.037037	0.0503597	11.8667	1.35971	0	34	5	19	T	TGME49_208030	2282	301	281	228	156	0.00331126	0.124113	0.0262009	0.127389	37.4823	4.862
TGME49_208030:2346	0	14	0	3	T	TGME49_208030	2346	79	100	69	105	0.0125	0.148515	0.0142857	0.0377358	11.8812	2.64151	6	35	15	15	T	TGME49_208030	2346	356	209	116	211	0.0196078	0.171429	0.136752	0.0754717	8.74286	0.551887
TGME49_208030:364	0	17	1	13	T	TGME49_208030	364	51	78	75	103	0.0192308	0.227848	0.0263158	0.134615	11.8481	5.11538	31	220	73	118	T	TGME49_208030	364	637	528	265	493	0.0501567	0.417769	0.278195	0.240891	8.32928	0.865904
TGME49_208450:194	0	24	0	7	T	TGME49_208450	194	149	119	77	193	0.00666667	0.208333	0.0128205	0.0412371	31.25	3.21649	0	25	0	8	T	TGME49_208450	194	85	95	7	78	0.0116279	0.270833	0.125	0.113924	23.2917	0.911392
TGME49_208450:207	0	12	0	12	T	TGME49_208450	207	39	107	43	147	0.025	0.12037	0.0227273	0.0878378	4.81481	3.86486	3	21	0	55	T	TGME49_208450	207	147	131	1	159	0.027027	0.166667	0.5	0.35	6.16667	0.7
TGME49_208450:217	0	24	0	57	T	TGME49_208450	217	44	123	30	178	0.0222222	0.201613	0.0322581	0.324022	9.07258	10.0447	4	34	21	29	T	TGME49_208450	217	180	148	28	191	0.0276243	0.234899	0.758621	0.15625	8.50336	0.205966
TGME49_208450:262	0	27	0	36	T	TGME49_208450	262	30	116	21	106	0.0322581	0.239316	0.0454545	0.345794	7.4188	7.60748	0	26	0	0	T	TGME49_208450	262	197	132	76	51	0.00505051	0.203008	0.012987	0.0192308	40.1955	1.48077
TGME49_208740:1457	0	5	3	11	T	TGME49_208740	1457	17	15	6	23	0.0555556	0.375	0.571429	0.5	6.75	0.875	0	10	1	9	T	TGME49_208740	1457	57	37	1	11	0.0172414	0.289474	1	0.833333	16.7895	0.833333
TGME49_208740:1813	0	7	0	1	T	TGME49_208740	1813	43	36	5	27	0.0227273	0.216216	0.166667	0.0714286	9.51351	0.428571	0	14	0	0	T	TGME49_208740	1813	51	46	1	30	0.0192308	0.319149	0.5	0.0322581	16.5957	0.0645161
TGME49_208740:281	0	5	0	2	T	TGME49_208740	281	15	25	5	20	0.0625	0.230769	0.166667	0.142857	3.69231	0.857143	0	7	0	0	T	TGME49_208740	281	118	47	55	37	0.00840336	0.166667	0.0178571	0.0263158	19.8333	1.47368
TGME49_208740:67	0	7	4	0	T	TGME49_208740	67	23	21	10	20	0.0416667	0.363636	0.454545	0.047619	8.72727	0.104762	0	8	0	0	T	TGME49_208740	67	97	71	9	18	0.0102041	0.125	0.1	0.0526316	12.25	0.526316
TGME49_209030:1042	0	32	1	6	T	TGME49_209030	1042	94	160	31	71	0.0105263	0.204969	0.0625	0.0972222	19.472	1.55556	0	29	0	27	T	TGME49_209030	1042	101	77	24	70	0.00980392	0.384615	0.04	0.394366	39.2308	9.85915
TGME49_209030:2504	0	21	4	7	T	TGME49_209030	2504	54	125	24	73	0.0181818	0.174603	0.2	0.108108	9.60317	0.540541	0	75	0	25	T	TGME49_209030	2504	82	176	1	145	0.0120482	0.429379	0.5	0.178082	35.6384	0.356164
TGME49_209290:1151	0	15	0	20	T	TGME49_209290	1151	66	48	31	64	0.0149254	0.326531	0.03125	0.323077	21.8776	10.3385	13	112	0	95	T	TGME49_209290	1151	265	281	70	182	0.0526316	0.400709	0.0140845	0.52459	7.61348	37.2459
TGME49_209290:1489	0	29	5	27	T	TGME49_209290	1489	60	59	16	63	0.0163934	0.5	0.352941	0.4375	30.5	1.23958	0	59	0	15	T	TGME49_209290	1489	133	221	80	105	0.00746269	0.27027	0.0123457	0.150943	36.2162	12.2264
TGME49_209290:1527	0	10	1	1	T	TGME49_209290	1527	160	83	18	74	0.00621118	0.130952	0.105263	0.0266667	21.0833	0.253333	10	59	0	26	T	TGME49_209290	1527	229	290	91	141	0.0478261	0.206186	0.0108696	0.190141	4.31115	17.493
TGME49_209600:654	0	9	0	2	T	TGME49_209600	654	13	27	1	10	0.0714286	0.357143	0.5	0.272727	5	0.545455	0	7	0	0	T	TGME49_209600	654	104	59	23	30	0.00952381	0.133333	0.0416667	0.0322581	14	0.774194
TGME49_209910:126	0	12	0	33	T	TGME49_209910	126	17	35	38	92	0.0555556	0.361111	0.025641	0.365591	6.5	14.2581	0	22	0	0	T	TGME49_209910	126	128	85	55	1	0.00775194	0.267442	0.0178571	0.5	34.5	28
TGME49_209910:313	0	10	0	0	T	TGME49_209910	313	32	37	9	63	0.030303	0.289474	0.1	0.015625	9.55263	0.15625	1	9	0	16	T	TGME49_209910	313	142	65	55	66	0.013986	0.151515	0.0178571	0.253731	10.8333	14.209
TGME49_209910:700	0	14	6	5	T	TGME49_209910	700	54	53	38	37	0.0181818	0.277778	0.179487	0.157895	15.2778	0.879699	17	86	13	39	T	TGME49_209910	700	294	272	105	338	0.0610169	0.318681	0.132075	0.117994	5.22283	0.893384
TGME49_209910:820	0	9	11	16	T	TGME49_209910	820	39	49	43	64	0.025	0.2	0.272727	0.261538	8	0.958974	4	12	0	0	T	TGME49_209910	820	112	63	94	29	0.0442478	0.203125	0.0105263	0.0333333	4.59063	3.16667
TGME49_209910:994	0	5	0	0	T	TGME49_209910	994	21	36	12	27	0.0454545	0.162162	0.0769231	0.0357143	3.56757	0.464286	0	18	0	0	T	TGME49_209910	994	113	76	129	81	0.00877193	0.246753	0.00769231	0.0121951	28.1299	1.58537
TGME49_209950:1989	0	7	2	0	T	TGME49_209950	1989	20	30	16	8	0.047619	0.258065	0.176471	0.111111	5.41935	0.62963	0	9	0	0	T	TGME49_209950	1989	34	40	10	20	0.0285714	0.243902	0.0909091	0.047619	8.53659	0.52381
TGME49_209950:2294	0	10	0	18	T	TGME49_209950	2294	14	19	11	26	0.0666667	0.55	0.0833333	0.703704	8.25	8.44444	0	7	0	0	T	TGME49_209950	2294	43	37	4	24	0.0227273	0.210526	0.2	0.04	9.26316	0.2
TGME49_210370:2581	0	11	0	1	T	TGME49_210370	2581	12	22	7	30	0.0769231	0.521739	0.125	0.0645161	6.78261	0.516129	0	9	0	0	T	TGME49_210370	2581	12	27	1	6	0.0769231	0.357143	0.5	0.142857	4.64286	0.285714
TGME49_210408:2481	0	5	0	10	T	TGME49_210408	2481	33	29	34	60	0.0294118	0.2	0.0285714	0.180328	6.8	6.31148	4	7	0	0	T	TGME49_210408	2481	109	49	28	23	0.0454545	0.16	0.0344828	0.0416667	3.52	1.20833
TGME49_210690:1063	0	24	0	14	T	TGME49_210690	1063	29	120	9	86	0.0333333	0.206612	0.1	0.172414	6.19835	1.72414	18	92	0	1	T	TGME49_210690	1063	388	510	134	205	0.0488432	0.181996	0.00740741	0.00970874	3.72613	1.31068
TGME49_210690:204	0	35	2	10	T	TGME49_210690	204	74	114	23	69	0.0133333	0.313043	0.125	0.157143	23.4783	1.25714	3	72	0	32	T	TGME49_210690	204	273	255	31	186	0.0145985	0.285156	0.03125	0.176471	19.5332	5.64706
TGME49_210690:346	0	50	15	29	T	TGME49_210690	346	108	110	35	116	0.00917431	0.459459	0.444444	0.25641	50.0811	0.576923	0	137	0	131	T	TGME49_210690	346	144	275	23	251	0.00689655	0.5	0.0416667	0.52381	72.5	12.5714
TGME49_210690:442	0	16	2	7	T	TGME49_210690	442	24	87	36	68	0.04	0.193182	0.0810811	0.115942	4.82955	1.42995	12	87	0	81	T	TGME49_210690	442	537	688	197	287	0.0241636	0.127721	0.00505051	0.284722	5.2857	56.375
TGME49_210690:548	0	18	17	13	T	TGME49_210690	548	87	96	37	44	0.0113636	0.195876	0.473684	0.311111	17.2371	0.65679	0	55	0	15	T	TGME49_210690	548	374	350	48	148	0.00266667	0.159544	0.0204082	0.107383	59.8291	5.26174
TGME49_210690:554	0	37	7	14	T	TGME49_210690	554	99	131	41	71	0.01	0.287879	0.190476	0.208333	28.7879	1.09375	6	75	0	44	T	TGME49_210690	554	409	336	28	159	0.0170732	0.225519	0.0344828	0.28125	13.209	8.15625
TGME49_210690:646	5	31	2	5	T	TGME49_210690	646	217	138	74	92	0.0275229	0.230216	0.04	0.0645161	8.36451	1.6129	29	166	0	9	T	TGME49_210690	646	776	641	232	338	0.03861	0.260125	0.00429184	0.0294985	6.73723	6.87316
TGME49_210690:731	0	19	0	12	T	TGME49_210690	731	137	110	42	92	0.00724638	0.18018	0.0232558	0.139785	24.8649	6.01075	32	51	0	15	T	TGME49_210690	731	426	173	119	65	0.0772834	0.298851	0.00833333	0.242424	3.86695	29.0909
TGME49_211030:877	0	5	0	0	T	TGME49_211030	877	28	15	2	10	0.0344828	0.375	0.333333	0.0909091	10.875	0.272727	0	7	0	0	T	TGME49_211030	877	18	42	6	19	0.0526316	0.186047	0.142857	0.05	3.53488	0.35
TGME49_211040:156	0	8	0	6	T	TGME49_211040	156	29	44	9	39	0.0333333	0.2	0.1	0.175	6	1.75	0	11	0	0	T	TGME49_211040	156	127	68	82	107	0.0078125	0.173913	0.0120482	0.00925926	22.2609	0.768519
TGME49_211260:1684	3	13	3	2	T	TGME49_211260	1684	89	50	9	20	0.0444444	0.27451	0.4	0.142857	6.17647	0.357143	0	9	0	2	T	TGME49_211260	1684	63	28	22	27	0.015625	0.344828	0.0434783	0.107143	22.069	2.46429
TGME49_211260:1983	0	8	0	4	T	TGME49_211260	1983	54	59	9	42	0.0181818	0.15	0.1	0.116279	8.25	1.16279	0	5	0	4	T	TGME49_211260	1983	66	32	31	4	0.0149254	0.181818	0.03125	1	12.1818	32
TGME49_211290:211	0	15	0	2	T	TGME49_211290	211	19	37	23	24	0.05	0.421053	0.0416667	0.12	8.42105	2.88	0	18	0	18	T	TGME49_211290	211	9	40	8	46	0.1	0.463415	0.111111	0.404255	4.63415	3.6383
TGME49_211290:533	0	9	1	0	T	TGME49_211290	533	59	58	19	29	0.0166667	0.169492	0.1	0.0333333	10.1695	0.333333	0	7	0	0	T	TGME49_211290	533	23	51	4	1	0.0416667	0.153846	0.2	0.5	3.69231	2.5
TGME49_211420:688	0	8	0	1	T	TGME49_211420	688	19	16	6	9	0.05	0.529412	0.142857	0.2	10.5882	1.4	0	20	0	13	T	TGME49_211420	688	103	72	51	14	0.00961539	0.287671	0.0192308	0.933333	29.9178	48.5333
TGME49_211630:202	0	10	0	3	T	TGME49_211630	202	16	41	7	29	0.0588235	0.261905	0.125	0.133333	4.45238	1.06667	0	18	0	72	T	TGME49_211630	202	93	74	23	109	0.0106383	0.253333	0.0416667	0.663636	23.8133	15.9273
TGME49_211630:441	0	8	0	8	T	TGME49_211630	441	30	41	3	38	0.0322581	0.214286	0.25	0.230769	6.64286	0.923077	0	7	0	0	T	TGME49_211630	441	88	59	19	39	0.011236	0.133333	0.05	0.025	11.8667	0.5
TGME49_211680:1024	0	10	0	1	T	TGME49_211680	1024	84	34	14	32	0.0117647	0.314286	0.0666667	0.0606061	26.7143	0.909091	0	17	11	0	T	TGME49_211680	1024	65	69	86	45	0.0151515	0.257143	0.137931	0.0217391	16.9714	0.157609
TGME49_211680:1233	0	14	4	8	T	TGME49_211680	1233	87	68	37	92	0.0113636	0.217391	0.131579	0.0967742	19.1304	0.735484	4	56	15	50	T	TGME49_211680	1233	117	169	95	118	0.0423729	0.335294	0.166667	0.428571	7.91294	2.57143
TGME49_211680:1428	0	16	0	32	T	TGME49_211680	1428	48	68	17	103	0.0204082	0.246377	0.0555556	0.317308	12.0725	5.71154	7	31	0	0	T	TGME49_211680	1428	219	225	181	183	0.0363636	0.141593	0.00549451	0.00543478	3.89381	0.98913
TGME49_211680:1938	0	22	0	4	T	TGME49_211680	1938	78	97	29	67	0.0126582	0.234694	0.0333333	0.0735294	18.5408	2.20588	7	22	10	15	T	TGME49_211680	1938	196	146	141	115	0.0406091	0.156463	0.0774648	0.137931	3.85289	1.78056
TGME49_211680:2002	0	19	0	14	T	TGME49_211680	2002	89	127	42	95	0.0111111	0.15625	0.0232558	0.15625	14.0625	6.71875	0	15	0	9	T	TGME49_211680	2002	48	78	60	46	0.0204082	0.202532	0.0163934	0.212766	9.92405	12.9787
TGME49_211680:2096	0	7	2	1	T	TGME49_211680	2096	27	43	13	45	0.0357143	0.181818	0.214286	0.0434783	5.09091	0.202899	0	12	0	0	T	TGME49_211680	2096	64	97	19	59	0.0153846	0.132653	0.05	0.0166667	8.62245	0.333333
TGME49_211680:485	0	5	0	1	T	TGME49_211680	485	30	16	13	32	0.0322581	0.352941	0.0714286	0.0606061	10.9412	0.848485	0	6	0	19	T	TGME49_211680	485	74	40	88	177	0.0133333	0.170732	0.011236	0.11236	12.8049	10
TGME49_211680:777	0	24	11	8	T	TGME49_211680	777	65	70	59	36	0.0151515	0.352113	0.2	0.243243	23.2394	1.21622	0	22	29	0	T	TGME49_211680	777	155	172	111	62	0.00641026	0.132948	0.267857	0.015873	20.7399	0.0592593
TGME49_211710:1808	0	5	0	6	T	TGME49_211710	1808	22	19	15	16	0.0434783	0.3	0.0625	0.411765	6.9	6.58824	0	7	20	0	T	TGME49_211710	1808	53	35	20	29	0.0185185	0.222222	1	0.0333333	12	0.0333333
TGME49_211710:512	0	6	0	7	T	TGME49_211710	512	22	23	10	17	0.0434783	0.291667	0.0909091	0.444444	6.70833	4.88889	0	6	0	0	T	TGME49_211710	512	69	43	11	56	0.0142857	0.159091	0.0833333	0.0175439	11.1364	0.210526
TGME49_211710:703	0	5	0	8	T	TGME49_211710	703	13	17	10	34	0.0714286	0.333333	0.0909091	0.257143	4.66667	2.82857	0	13	0	0	T	TGME49_211710	703	15	40	8	20	0.0625	0.341463	0.111111	0.047619	5.46341	0.428571
TGME49_211850:712	0	13	0	7	T	TGME49_211850	712	15	34	6	15	0.0625	0.4	0.142857	0.5	6.4	3.5	0	11	0	19	T	TGME49_211850	712	61	65	1	19	0.016129	0.181818	0.5	1	11.2727	2
TGME49_212270:1162	0	25	5	7	T	TGME49_212270	1162	64	138	73	129	0.0153846	0.18705	0.0810811	0.0615385	12.1583	0.758974	0	9	0	12	T	TGME49_212270	1162	192	72	14	81	0.00518135	0.136986	0.0666667	0.158537	26.4384	2.37805
TGME49_212270:1710	0	9	0	32	T	TGME49_212270	1710	58	62	12	62	0.0169492	0.15873	0.0769231	0.52381	9.36508	6.80952	7	46	0	28	T	TGME49_212270	1710	262	166	29	124	0.0304183	0.281437	0.0333333	0.232	9.25225	6.96
TGME49_212270:1807	0	22	0	2	T	TGME49_212270	1807	44	84	27	42	0.0222222	0.270588	0.0357143	0.0697674	12.1765	1.95349	0	36	0	19	T	TGME49_212270	1807	360	281	273	212	0.00277008	0.131206	0.00364964	0.0938967	47.3652	25.7277
TGME49_212270:1843	0	42	0	28	T	TGME49_212270	1843	39	96	7	61	0.025	0.443299	0.125	0.467742	17.732	3.74194	0	38	0	63	T	TGME49_212270	1843	379	208	32	93	0.00263158	0.186603	0.030303	0.680851	70.9091	22.4681
TGME49_212270:2489	0	9	2	4	T	TGME49_212270	2489	115	53	47	86	0.00862069	0.185185	0.0625	0.0574713	21.4815	0.91954	6	32	0	0	T	TGME49_212270	2489	271	154	151	90	0.0257353	0.212903	0.00657895	0.010989	8.27281	1.67033
TGME49_212270:937	0	11	7	1	T	TGME49_212270	937	19	36	24	44	0.05	0.324324	0.32	0.0444444	6.48649	0.138889	1	12	4	0	T	TGME49_212270	937	80	58	5	31	0.0246914	0.220339	0.833333	0.03125	8.92373	0.0375
TGME49_212270:957	0	13	0	8	T	TGME49_212270	957	28	68	30	61	0.0344828	0.202899	0.0322581	0.145161	5.88406	4.5	2	11	0	0	T	TGME49_212270	957	112	91	45	7	0.0265487	0.130435	0.0217391	0.125	4.91304	5.75
TGME49_212290:1550	0	18	0	16	T	TGME49_212290	1550	23	88	44	66	0.0416667	0.213483	0.0222222	0.253731	5.1236	11.4179	0	58	3	0	T	TGME49_212290	1550	335	390	80	384	0.00297619	0.150895	0.0493827	0.0025974	50.7008	0.0525974
TGME49_212290:1593	0	21	3	4	T	TGME49_212290	1593	88	103	53	49	0.011236	0.211538	0.0740741	0.1	18.8269	1.35	12	79	0	57	T	TGME49_212290	1593	417	433	70	201	0.0311005	0.184332	0.0140845	0.287129	5.92698	20.3861
TGME49_212290:2150	0	31	0	23	T	TGME49_212290	2150	91	103	37	110	0.0108696	0.307692	0.0263158	0.216216	28.3077	8.21622	15	99	0	77	T	TGME49_212290	2150	357	414	92	253	0.0446927	0.240964	0.0107527	0.307087	5.39157	28.5591
TGME49_212300:552	0	6	0	4	T	TGME49_212300	552	35	38	8	31	0.0277778	0.179487	0.111111	0.15625	6.46154	1.40625	0	20	0	0	T	TGME49_212300	552	61	48	43	25	0.016129	0.428571	0.0227273	0.0384615	26.5714	1.69231
TGME49_212300:587	0	7	0	17	T	TGME49_212300	587	16	24	20	35	0.0588235	0.32	0.047619	0.5	5.44	10.5	0	8	0	0	T	TGME49_212300	587	28	38	10	25	0.0344828	0.230769	0.0909091	0.0384615	6.69231	0.423077
TGME49_212300:747	0	9	0	0	T	TGME49_212300	747	8	21	1	13	0.111111	0.454545	0.5	0.0714286	4.09091	0.142857	0	13	0	0	T	TGME49_212300	747	70	90	60	40	0.0140845	0.153846	0.0163934	0.0243902	10.9231	1.4878
TGME49_212300:910	0	15	1	14	T	TGME49_212300	910	23	52	15	47	0.0416667	0.301887	0.125	0.3125	7.24528	2.5	0	35	0	34	T	TGME49_212300	910	107	126	22	123	0.00925926	0.283465	0.0434783	0.282258	30.6142	6.49194
TGME49_212310:984	0	6	0	7	T	TGME49_212310	984	15	26	18	31	0.0625	0.259259	0.0526316	0.25	4.14815	4.75	0	9	0	0	T	TGME49_212310	984	85	73	24	18	0.0116279	0.135135	0.04	0.0526316	11.6216	1.31579
TGME49_213030:1722	0	6	0	1	T	TGME49_213030	1722	17	11	1	15	0.0555556	0.583333	0.5	0.125	10.5	0.25	0	9	0	0	T	TGME49_213030	1722	14	27	41	34	0.0666667	0.357143	0.0238095	0.0285714	5.35714	1.2
TGME49_213050:1916	0	8	1	14	T	TGME49_213050	1916	54	50	5	45	0.0181818	0.176471	0.333333	0.326087	9.70588	0.978261	0	9	0	0	T	TGME49_213050	1916	179	82	20	9	0.00555556	0.120482	0.047619	0.1	21.6867	2.1
TGME49_213050:853	0	9	1	7	T	TGME49_213050	853	41	52	11	30	0.0238095	0.188679	0.166667	0.258065	7.92453	1.54839	0	17	0	0	T	TGME49_213050	853	118	108	17	8	0.00840336	0.165138	0.0555556	0.111111	19.6514	2
TGME49_213280:123	1	35	1	47	T	TGME49_213280	123	110	157	64	105	0.018018	0.227848	0.0307692	0.45283	12.6456	14.717	28	249	92	194	T	TGME49_213280	123	358	625	305	409	0.0807799	0.399361	0.303922	0.47561	4.94381	1.56491
TGME49_213280:1425	2	15	0	10	T	TGME49_213280	1425	119	72	46	80	0.025	0.219178	0.0212766	0.135802	8.76712	6.38272	0	35	0	39	T	TGME49_213280	1425	256	186	169	131	0.00389105	0.192513	0.00588235	0.30303	49.4759	51.5152
TGME49_213280:344	0	10	9	12	T	TGME49_213280	344	109	83	61	99	0.00909091	0.130952	0.16129	0.13	14.4048	0.806	1	62	0	31	T	TGME49_213280	344	518	302	113	191	0.00385357	0.207921	0.00877193	0.166667	53.9554	19
TGME49_213280:655	0	8	0	4	T	TGME49_213280	655	18	47	40	49	0.0526316	0.1875	0.0243902	0.1	3.5625	4.1	0	48	0	25	T	TGME49_213280	655	188	247	46	229	0.005291	0.197581	0.0212766	0.113043	37.3427	5.31304
TGME49_213280:780	0	10	0	9	T	TGME49_213280	780	68	72	31	51	0.0144928	0.150685	0.03125	0.192308	10.3973	6.15385	0	58	9	53	T	TGME49_213280	780	463	306	211	301	0.00215517	0.192182	0.0471698	0.178808	89.1726	3.79073
TGME49_213280:970	5	25	11	7	T	TGME49_213280	970	123	129	52	84	0.0483871	0.2	0.226415	0.0941176	4.13333	0.415686	0	73	7	1	T	TGME49_213280	970	280	304	244	136	0.00355872	0.242623	0.0326531	0.0145985	68.177	0.44708
TGME49_213350:706	0	31	0	20	T	TGME49_213350	706	56	105	37	113	0.0175439	0.301887	0.0263158	0.184211	17.2075	7	10	71	0	63	T	TGME49_213350	706	281	326	77	133	0.0390071	0.220183	0.0128205	0.477612	5.6447	37.2537
TGME49_213350:753	10	46	1	16	T	TGME49_213350	753	153	160	54	118	0.0714286	0.291925	0.0363636	0.142857	4.08696	3.92857	36	157	0	87	T	TGME49_213350	753	593	401	138	172	0.0622896	0.393035	0.00719425	0.508671	6.3098	70.7052
TGME49_213350:763	0	76	4	25	T	TGME49_213350	763	154	233	98	132	0.00645161	0.32906	0.0505051	0.195489	51.0043	3.87068	0	85	0	99	T	TGME49_213350	763	717	519	173	394	0.00139276	0.165385	0.00574713	0.253165	118.746	44.0506
TGME49_213570:1593	0	5	0	3	T	TGME49_213570	1593	19	18	9	10	0.05	0.315789	0.1	0.363636	6.31579	3.63636	0	20	0	5	T	TGME49_213570	1593	35	40	49	28	0.0277778	0.512195	0.02	0.206897	18.439	10.3448
TGME49_213580:438	0	38	2	28	T	TGME49_213580	438	52	154	41	135	0.0188679	0.251613	0.0714286	0.213235	13.3355	2.98529	40	250	0	80	T	TGME49_213580	438	1161	527	321	374	0.035284	0.475379	0.00310559	0.216	13.4729	69.552
TGME49_213660:1559	0	5	0	0	T	TGME49_213660	1559	13	16	6	10	0.0714286	0.352941	0.142857	0.0909091	4.94118	0.636364	0	8	0	0	T	TGME49_213660	1559	12	30	3	30	0.0769231	0.290323	0.25	0.0322581	3.77419	0.129032
TGME49_213730:1445	0	5	0	1	T	TGME49_213730	1445	25	38	2	28	0.0384615	0.153846	0.333333	0.0689655	4	0.206897	0	8	0	0	T	TGME49_213730	1445	82	48	40	5	0.0120482	0.183673	0.0243902	0.166667	15.2449	6.83333
TGME49_213730:2431	0	6	0	0	T	TGME49_213730	2431	20	32	3	19	0.047619	0.212121	0.25	0.05	4.45455	0.2	0	6	0	0	T	TGME49_213730	2431	82	37	65	25	0.0120482	0.184211	0.0151515	0.0384615	15.2895	2.53846
TGME49_213800:1595	0	5	3	0	T	TGME49_213800	1595	13	13	4	6	0.0714286	0.428571	0.8	0.142857	6	0.178571	0	10	0	0	T	TGME49_213800	1595	26	21	12	20	0.037037	0.5	0.0769231	0.047619	13.5	0.619048
TGME49_213940:189	0	48	7	62	T	TGME49_213940	189	18	86	21	106	0.0526316	0.563218	0.363636	0.588785	10.7011	1.61916	20	263	0	124	T	TGME49_213940	189	267	561	64	233	0.0783582	0.469751	0.0153846	0.534188	5.99492	34.7222
TGME49_213940:233	1	11	0	17	T	TGME49_213940	233	90	33	16	37	0.021978	0.352941	0.0588235	0.473684	16.0588	8.05263	4	56	0	5	T	TGME49_213940	233	169	236	95	131	0.0294118	0.240506	0.0104167	0.0454545	8.17722	4.36364
TGME49_213940:449	0	16	0	12	T	TGME49_213940	449	70	73	11	33	0.0140845	0.22973	0.0833333	0.382353	16.3108	4.58824	6	81	29	12	T	TGME49_213940	449	335	279	213	60	0.0208333	0.292857	0.140187	0.213115	14.0571	1.52022
TGME49_213940:569	0	30	0	9	T	TGME49_213940	569	63	112	11	65	0.015625	0.274336	0.0833333	0.151515	17.5575	1.81818	0	41	0	0	T	TGME49_213940	569	79	222	35	117	0.0125	0.188341	0.0277778	0.00847458	15.0673	0.305085
TGME49_213940:605	0	20	1	7	T	TGME49_213940	605	70	139	44	103	0.0140845	0.15	0.0444444	0.0769231	10.65	1.73077	0	38	0	0	T	TGME49_213940	605	450	320	140	216	0.0022173	0.121495	0.0070922	0.0046083	54.7944	0.64977
TGME49_213940:658	8	65	8	37	T	TGME49_213940	658	158	160	65	120	0.0566038	0.409938	0.136364	0.31405	7.24224	2.30303	31	101	0	23	T	TGME49_213940	658	655	367	65	171	0.0487805	0.277174	0.0151515	0.139535	5.68207	9.2093
TGME49_214080:1080	0	8	0	11	T	TGME49_214080	1080	35	43	16	36	0.0277778	0.204545	0.0588235	0.324324	7.36364	5.51351	0	16	1	41	T	TGME49_214080	1080	36	38	11	112	0.027027	0.435897	0.166667	0.371681	16.1282	2.23009
TGME49_214080:525	0	7	0	4	T	TGME49_214080	525	28	26	8	17	0.0344828	0.296296	0.111111	0.277778	8.59259	2.5	0	20	0	5	T	TGME49_214080	525	86	58	31	56	0.0114943	0.355932	0.03125	0.105263	30.9661	3.36842
TGME49_214080:552	0	5	0	5	T	TGME49_214080	552	62	34	7	38	0.015873	0.171429	0.125	0.153846	10.8	1.23077	0	10	0	0	T	TGME49_214080	552	23	72	96	57	0.0416667	0.150685	0.0103093	0.0172414	3.61644	1.67241
TGME49_214220:424	2	157	0	97	T	TGME49_214220	424	87	268	34	175	0.0340909	0.587361	0.0285714	0.556818	17.2292	19.4886	53	158	0	68	T	TGME49_214220	424	1142	807	430	661	0.0472441	0.196782	0.00232019	0.10423	4.16522	44.923
TGME49_214220:571	0	29	0	11	T	TGME49_214220	571	144	246	71	166	0.00689655	0.121457	0.0138889	0.0718563	17.6113	5.17365	5	50	0	37	T	TGME49_214220	571	279	368	96	199	0.0214286	0.138211	0.0103093	0.19	6.44986	18.43
TGME49_214320:1307	0	6	0	3	T	TGME49_214320	1307	31	20	6	34	0.03125	0.333333	0.142857	0.114286	10.6667	0.8	0	5	9	0	T	TGME49_214320	1307	33	28	39	50	0.0294118	0.206897	0.25	0.0196078	7.03448	0.0784314
TGME49_214320:1865	0	5	0	2	T	TGME49_214320	1865	21	22	14	11	0.0454545	0.26087	0.0666667	0.25	5.73913	3.75	0	10	1	0	T	TGME49_214320	1865	26	21	1	11	0.037037	0.5	1	0.0833333	13.5	0.0833333
TGME49_214320:2476	0	5	3	7	T	TGME49_214320	2476	25	22	6	25	0.0384615	0.26087	0.571429	0.307692	6.78261	0.538462	0	15	38	0	T	TGME49_214320	2476	23	57	38	42	0.0416667	0.275862	1	0.0232558	6.62069	0.0232558
TGME49_214410:1787	0	5	0	6	T	TGME49_214410	1787	23	40	17	22	0.0416667	0.146341	0.0555556	0.304348	3.5122	5.47826	0	14	5	3	T	TGME49_214410	1787	146	103	29	68	0.00680272	0.144231	0.2	0.057971	21.2019	0.289855
TGME49_214410:3172	0	7	0	0	T	TGME49_214410	3172	46	48	8	7	0.0212766	0.163265	0.111111	0.125	7.67347	1.125	0	8	0	0	T	TGME49_214410	3172	35	70	12	97	0.0277778	0.126761	0.0769231	0.0102041	4.56338	0.132653
TGME49_214410:3808	0	9	0	5	T	TGME49_214410	3808	89	52	22	48	0.0111111	0.188679	0.0434783	0.122449	16.9811	2.81633	0	6	0	0	T	TGME49_214410	3808	34	42	7	27	0.0285714	0.162791	0.125	0.0357143	5.69767	0.285714
TGME49_214410:4195	0	10	5	0	T	TGME49_214410	4195	143	85	37	46	0.00694444	0.127907	0.157895	0.0212766	18.4186	0.134752	0	5	0	0	T	TGME49_214410	4195	28	26	55	13	0.0344828	0.222222	0.0178571	0.0714286	6.44444	4
TGME49_214790:1512	0	5	0	1	T	TGME49_214790	1512	9	15	24	39	0.1	0.375	0.04	0.05	3.75	1.25	0	13	1	0	T	TGME49_214790	1512	91	48	41	29	0.0108696	0.285714	0.047619	0.0333333	26.2857	0.7
TGME49_214840:10263	0	6	0	2	T	TGME49_214840	10263	56	38	3	20	0.0175439	0.179487	0.25	0.142857	10.2308	0.571429	0	7	14	0	T	TGME49_214840	10263	45	45	63	37	0.0217391	0.173913	0.234375	0.0263158	8	0.112281
TGME49_214840:10276	0	6	0	0	T	TGME49_214840	10276	24	43	10	25	0.04	0.159091	0.0909091	0.0384615	3.97727	0.423077	4	11	0	0	T	TGME49_214840	10276	134	82	14	36	0.037037	0.144578	0.0666667	0.027027	3.90361	0.405405
TGME49_214840:11505	0	6	0	3	T	TGME49_214840	11505	11	21	5	14	0.0833333	0.318182	0.166667	0.266667	3.81818	1.6	0	7	0	0	T	TGME49_214840	11505	12	9	25	25	0.0769231	0.8	0.0384615	0.0384615	10.4	1
TGME49_214840:8488	0	6	0	0	T	TGME49_214840	8488	15	16	4	2	0.0625	0.411765	0.2	0.333333	6.58824	1.66667	0	6	0	24	T	TGME49_214840	8488	55	39	4	124	0.0178571	0.175	0.2	0.2	9.8	1
TGME49_214880:4858	0	6	0	0	T	TGME49_214880	4858	23	14	3	16	0.0416667	0.466667	0.25	0.0588235	11.2	0.235294	0	7	0	17	T	TGME49_214880	4858	8	18	16	39	0.111111	0.421053	0.0588235	0.45	3.78947	7.65
TGME49_214940:1093	1	27	4	32	T	TGME49_214940	1093	182	198	183	211	0.010929	0.140704	0.0271739	0.15566	12.8744	5.7283	18	80	4	53	T	TGME49_214940	1093	748	481	303	296	0.0253672	0.16805	0.0164474	0.181818	6.6247	11.0545
TGME49_214940:1515	0	18	0	9	T	TGME49_214940	1515	92	123	61	99	0.0107527	0.153226	0.016129	0.1	14.25	6.2	0	23	0	19	T	TGME49_214940	1515	354	161	101	114	0.0028169	0.148148	0.00980392	0.173913	52.5926	17.7391
TGME49_214940:1979	0	18	0	5	T	TGME49_214940	1979	70	140	51	115	0.0140845	0.134752	0.0192308	0.0517241	9.56738	2.68966	0	13	0	0	T	TGME49_214940	1979	167	93	70	96	0.00595238	0.148936	0.0140845	0.0103093	25.0213	0.731959
TGME49_214940:2569	0	5	0	1	T	TGME49_214940	2569	30	32	25	24	0.0322581	0.181818	0.0384615	0.08	5.63636	2.08	0	11	0	1	T	TGME49_214940	2569	89	56	33	1	0.0111111	0.210526	0.0294118	1	18.9474	34
TGME49_214950:2173	0	5	0	6	T	TGME49_214950	2173	18	28	26	30	0.0526316	0.206897	0.037037	0.225806	3.93103	6.09677	0	6	0	0	T	TGME49_214950	2173	43	48	5	72	0.0227273	0.142857	0.166667	0.0136986	6.28571	0.0821918
TGME49_214950:2995	0	13	0	4	T	TGME49_214950	2995	6	23	4	23	0.142857	0.583333	0.2	0.208333	4.08333	1.04167	0	20	1	33	T	TGME49_214950	2995	31	33	1	37	0.03125	0.617647	1	0.894737	19.7647	0.894737
TGME49_214950:3393	0	5	0	9	T	TGME49_214950	3393	17	18	9	47	0.0555556	0.315789	0.1	0.208333	5.68421	2.08333	0	5	0	8	T	TGME49_214950	3393	24	39	11	8	0.04	0.15	0.0833333	1	3.75	12
TGME49_215150:205	0	6	0	0	T	TGME49_215150	205	18	17	1	1	0.0526316	0.388889	0.5	0.5	7.38889	1	0	7	1	28	T	TGME49_215150	205	30	13	12	63	0.0322581	0.571429	0.153846	0.453125	17.7143	2.94531
TGME49_215220:1101	0	7	0	2	T	TGME49_215220	1101	65	35	10	36	0.0151515	0.222222	0.0909091	0.0810811	14.6667	0.891892	0	5	0	0	T	TGME49_215220	1101	37	28	12	4	0.0263158	0.206897	0.0769231	0.2	7.86207	2.6
TGME49_215220:2469	0	22	3	12	T	TGME49_215220	2469	50	64	52	58	0.0196078	0.353846	0.0754717	0.220339	18.0462	2.91949	8	39	38	42	T	TGME49_215220	2469	126	70	56	79	0.0708661	0.56338	0.684211	0.5375	7.94992	0.785577
TGME49_215220:2595	0	7	1	1	T	TGME49_215220	2595	15	32	12	34	0.0625	0.242424	0.153846	0.0571429	3.87879	0.371429	0	19	0	0	T	TGME49_215220	2595	93	91	116	5	0.0106383	0.217391	0.00854701	0.166667	20.4348	19.5
TGME49_215220:2707	0	11	0	4	T	TGME49_215220	2707	44	63	4	53	0.0222222	0.1875	0.2	0.0925926	8.4375	0.462963	0	6	34	0	T	TGME49_215220	2707	70	44	103	143	0.0140845	0.155556	0.336538	0.00694444	11.0444	0.0206349
TGME49_215220:494	0	6	5	13	T	TGME49_215220	494	32	50	26	54	0.030303	0.137255	0.222222	0.254545	4.52941	1.14545	0	30	0	35	T	TGME49_215220	494	119	140	69	170	0.00833333	0.219858	0.0142857	0.210526	26.383	14.7368
TGME49_215460:1059	0	22	11	22	T	TGME49_215460	1059	49	77	49	105	0.02	0.294872	0.24	0.216981	14.7436	0.904088	0	22	0	0	T	TGME49_215460	1059	216	120	63	30	0.0046083	0.190083	0.015625	0.0322581	41.2479	2.06452
TGME49_215460:1072	0	15	0	6	T	TGME49_215460	1072	71	76	44	72	0.0138889	0.207792	0.0222222	0.0958904	14.961	4.31507	0	14	0	0	T	TGME49_215460	1072	100	104	38	40	0.00990099	0.142857	0.025641	0.0243902	14.4286	0.95122
TGME49_215460:658	0	11	3	7	T	TGME49_215460	658	54	52	19	55	0.0181818	0.226415	0.2	0.142857	12.4528	0.714286	21	85	0	29	T	TGME49_215460	658	334	266	62	218	0.0656716	0.322097	0.015873	0.136986	4.90466	8.63014
TGME49_215470:446	0	26	5	11	T	TGME49_215470	446	148	77	12	67	0.00671141	0.346154	0.461538	0.176471	51.5769	0.382353	1	20	0	0	T	TGME49_215470	446	51	62	18	1	0.0384615	0.333333	0.0526316	0.5	8.66667	9.5
TGME49_215470:519	0	17	5	13	T	TGME49_215470	519	61	59	65	70	0.016129	0.3	0.0909091	0.197183	18.6	2.16901	23	61	60	19	T	TGME49_215470	519	883	501	354	332	0.0271493	0.123506	0.171831	0.0600601	4.54914	0.34953
TGME49_215530:1094	3	13	3	10	T	TGME49_215530	1094	152	98	37	74	0.0261438	0.141414	0.105263	0.146667	5.40909	1.39333	1	6	1	0	T	TGME49_215530	1094	52	42	10	62	0.0377358	0.162791	0.181818	0.015873	4.31395	0.0873016
TGME49_215530:1109	0	12	0	9	T	TGME49_215530	1109	109	95	25	53	0.00909091	0.135417	0.0384615	0.185185	14.8958	4.81481	2	43	0	0	T	TGME49_215530	1109	146	140	13	40	0.0204082	0.312057	0.0714286	0.0243902	15.2908	0.341463
TGME49_215530:1571	0	29	1	10	T	TGME49_215530	1571	31	69	56	59	0.03125	0.428571	0.0350877	0.183333	13.7143	5.225	10	132	23	75	T	TGME49_215530	1571	271	371	146	220	0.0404412	0.357527	0.163265	0.343891	8.84066	2.10633
TGME49_215530:1681	0	16	0	18	T	TGME49_215530	1681	120	110	44	81	0.00826446	0.153153	0.0222222	0.231707	18.5315	10.4268	0	21	0	20	T	TGME49_215530	1681	134	123	12	121	0.00740741	0.177419	0.0769231	0.172131	23.9516	2.2377
TGME49_215530:1923	0	16	0	14	T	TGME49_215530	1923	81	65	28	50	0.0121951	0.257576	0.0344828	0.294118	21.1212	8.52941	0	19	0	37	T	TGME49_215530	1923	132	83	165	90	0.0075188	0.238095	0.0060241	0.417582	31.6667	69.3187
TGME49_215530:1955	0	5	0	0	T	TGME49_215530	1955	169	48	24	42	0.00588235	0.122449	0.04	0.0232558	20.8163	0.581395	4	13	0	10	T	TGME49_215530	1955	133	97	1	10	0.0373134	0.142857	0.5	1	3.82857	2
TGME49_215775:1993	0	12	0	9	T	TGME49_215775	1993	44	82	44	92	0.0222222	0.156627	0.0222222	0.107527	7.04819	4.83871	19	81	0	15	T	TGME49_215775	1993	742	550	351	474	0.0269179	0.14882	0.00284091	0.0336842	5.52868	11.8568
TGME49_215785:1700	0	7	0	6	T	TGME49_215785	1700	57	62	15	57	0.0172414	0.126984	0.0625	0.12069	7.36508	1.93103	0	20	0	7	T	TGME49_215785	1700	255	170	157	130	0.00390625	0.122807	0.00632911	0.0610687	31.4386	9.64885
TGME49_215785:634	0	11	0	6	T	TGME49_215785	634	91	64	33	66	0.0108696	0.184615	0.0294118	0.104478	16.9846	3.55224	9	64	23	51	T	TGME49_215785	634	752	507	416	545	0.0132802	0.127953	0.057554	0.0952381	9.63484	1.65476
TGME49_215785:999	1	7	10	11	T	TGME49_215785	999	87	64	43	91	0.0227273	0.123077	0.25	0.130435	5.41538	0.521739	5	31	0	1	T	TGME49_215785	999	269	246	193	145	0.0222222	0.129555	0.00515464	0.0136986	5.82996	2.65753
TGME49_215980:24	0	112	7	59	T	TGME49_215980	24	156	403	88	331	0.00636943	0.279703	0.0898876	0.180723	43.9134	2.01054	91	462	19	274	T	TGME49_215980	24	678	950	263	666	0.135493	0.486856	0.0757576	0.412294	3.59321	5.44228
TGME49_216180:386	0	8	1	32	T	TGME49_216180	386	15	18	3	47	0.0625	0.473684	0.5	0.6875	7.57895	1.375	1	54	0	28	T	TGME49_216180	386	116	116	76	70	0.017094	0.470085	0.012987	0.408451	27.5	31.4507
TGME49_216670:4328	0	5	0	1	T	TGME49_216670	4328	18	16	14	7	0.0526316	0.352941	0.0666667	0.25	6.70588	3.75	0	10	2	0	T	TGME49_216670	4328	20	17	3	12	0.047619	0.611111	0.75	0.0769231	12.8333	0.102564
TGME49_216720:2064	0	5	0	0	T	TGME49_216720	2064	41	49	8	33	0.0238095	0.12	0.111111	0.0294118	5.04	0.264706	0	5	0	6	T	TGME49_216720	2064	53	23	112	8	0.0185185	0.25	0.00884956	0.777778	13.5	87.8889
TGME49_216720:2267	0	5	0	1	T	TGME49_216720	2267	18	27	23	19	0.0526316	0.214286	0.0416667	0.1	4.07143	2.4	1	10	0	0	T	TGME49_216720	2267	68	68	25	53	0.0289855	0.15942	0.0384615	0.0185185	5.5	0.481481
TGME49_216820:1270	0	5	0	9	T	TGME49_216820	1270	13	13	16	44	0.0714286	0.428571	0.0588235	0.222222	6	3.77778	0	13	0	10	T	TGME49_216820	1270	96	45	8	10	0.0103093	0.304348	0.111111	1	29.5217	9
TGME49_216860:1709	0	5	0	2	T	TGME49_216860	1709	77	37	8	28	0.0128205	0.157895	0.111111	0.103448	12.3158	0.931034	0	8	0	0	T	TGME49_216860	1709	31	44	14	2	0.03125	0.2	0.0666667	0.333333	6.4	5
TGME49_216860:1912	0	11	0	1	T	TGME49_216860	1912	109	65	48	48	0.00909091	0.181818	0.0204082	0.0408163	20	2	0	12	0	0	T	TGME49_216860	1912	88	88	51	112	0.011236	0.146067	0.0192308	0.00884956	13	0.460177
TGME49_216860:566	0	13	0	9	T	TGME49_216860	566	48	53	15	27	0.0204082	0.259259	0.0625	0.357143	12.7037	5.71429	0	13	0	0	T	TGME49_216860	566	97	86	15	55	0.0102041	0.16092	0.0625	0.0178571	15.7701	0.285714
TGME49_216860:851	0	6	0	15	T	TGME49_216860	851	27	48	30	59	0.0357143	0.142857	0.0322581	0.266667	4	8.26667	0	21	0	0	T	TGME49_216860	851	171	163	16	65	0.00581395	0.134146	0.0588235	0.0151515	23.0732	0.257576
TGME49_216880:1166	0	21	0	7	T	TGME49_216880	1166	27	94	8	67	0.0357143	0.231579	0.111111	0.117647	6.48421	1.05882	0	21	0	14	T	TGME49_216880	1166	260	174	83	75	0.00383142	0.125714	0.0119048	0.197368	32.8114	16.5789
TGME49_216970:1405	0	5	0	0	T	TGME49_216970	1405	16	17	4	18	0.0588235	0.333333	0.2	0.0526316	5.66667	0.263158	0	5	0	0	T	TGME49_216970	1405	59	36	26	68	0.0166667	0.162162	0.037037	0.0144928	9.72973	0.391304
TGME49_217160:58	0	6	0	0	T	TGME49_217160	58	27	19	3	33	0.0357143	0.35	0.25	0.0294118	9.8	0.117647	0	10	0	0	T	TGME49_217160	58	8	27	18	12	0.111111	0.392857	0.0526316	0.0769231	3.53571	1.46154
TGME49_217510:126	0	9	0	5	T	TGME49_217510	126	15	37	16	54	0.0625	0.263158	0.0588235	0.109091	4.21053	1.85455	0	14	0	0	T	TGME49_217510	126	15	56	5	13	0.0625	0.263158	0.166667	0.0714286	4.21053	0.428571
TGME49_217510:372	0	11	0	4	T	TGME49_217510	372	24	46	31	28	0.04	0.255319	0.03125	0.172414	6.38298	5.51724	0	12	0	28	T	TGME49_217510	372	60	51	1	28	0.0163934	0.25	0.5	1	15.25	2
TGME49_217520:1458	0	7	0	1	T	TGME49_217520	1458	22	19	12	15	0.0434783	0.4	0.0769231	0.125	9.2	1.625	0	9	27	0	T	TGME49_217520	1458	27	51	67	34	0.0357143	0.192308	0.411765	0.0285714	5.38462	0.0693878
TGME49_217520:1566	0	5	0	8	T	TGME49_217520	1566	48	23	14	12	0.0204082	0.25	0.0666667	0.692308	12.25	10.3846	0	14	0	0	T	TGME49_217520	1566	39	67	82	65	0.025	0.220588	0.0120482	0.0151515	8.82353	1.25758
TGME49_217520:2249	0	6	0	0	T	TGME49_217520	2249	24	21	17	11	0.04	0.318182	0.0555556	0.0833333	7.95455	1.5	0	11	0	0	T	TGME49_217520	2249	14	13	33	28	0.0666667	0.857143	0.0294118	0.0344828	12.8571	1.17241
TGME49_217540:1213	0	7	2	1	T	TGME49_217540	1213	11	16	8	19	0.0833333	0.470588	0.333333	0.1	5.64706	0.3	0	11	0	30	T	TGME49_217540	1213	29	56	33	30	0.0333333	0.210526	0.0294118	1	6.31579	34
TGME49_217540:1669	0	11	0	1	T	TGME49_217540	1669	16	26	3	26	0.0588235	0.444444	0.25	0.0740741	7.55556	0.296296	0	15	19	0	T	TGME49_217540	1669	146	90	119	33	0.00680272	0.175824	0.166667	0.0294118	25.8462	0.176471
TGME49_217540:701	0	6	0	0	T	TGME49_217540	701	21	30	2	42	0.0454546	0.225806	0.333333	0.0232558	4.96774	0.0697674	0	5	0	0	T	TGME49_217540	701	46	24	6	11	0.0212766	0.24	0.142857	0.0833333	11.28	0.583333
TGME49_217680:6345	0	5	0	0	T	TGME49_217680	6345	56	17	11	9	0.0175439	0.333333	0.0833333	0.1	19	1.2	0	14	0	0	T	TGME49_217680	6345	12	40	17	76	0.0769231	0.365854	0.0555556	0.012987	4.7561	0.233766
TGME49_217680:7552	0	8	1	1	T	TGME49_217680	7552	9	15	6	9	0.1	0.5625	0.285714	0.2	5.625	0.7	0	5	0	3	T	TGME49_217680	7552	15	17	6	20	0.0625	0.333333	0.142857	0.190476	5.33333	1.33333
TGME49_217890:1164	0	5	0	5	T	TGME49_217890	1164	29	29	11	13	0.0333333	0.2	0.0833333	0.428571	6	5.14286	0	10	0	33	T	TGME49_217890	1164	111	82	24	90	0.00892857	0.13253	0.04	0.373626	14.8434	9.34066
TGME49_217890:1397	1	9	3	10	T	TGME49_217890	1397	34	32	19	30	0.0571429	0.30303	0.2	0.354839	5.30303	1.77419	5	11	0	0	T	TGME49_217890	1397	191	99	45	12	0.03125	0.12	0.0217391	0.0769231	3.84	3.53846
TGME49_217890:1648	0	12	0	9	T	TGME49_217890	1648	38	54	22	24	0.025641	0.236364	0.0434783	0.4	9.21818	9.2	8	35	1	0	T	TGME49_217890	1648	229	191	131	91	0.0391304	0.1875	0.0151515	0.0108696	4.79167	0.717391
TGME49_217890:2013	0	17	0	3	T	TGME49_217890	2013	49	77	33	47	0.02	0.230769	0.0294118	0.0833333	11.5385	2.83333	1	40	1	7	T	TGME49_217890	2013	94	126	120	124	0.0210526	0.322835	0.0165289	0.064	15.3346	3.872
TGME49_218260:111	0	14	0	15	T	TGME49_218260	111	35	69	24	45	0.0277778	0.214286	0.04	0.347826	7.71429	8.69565	0	9	0	0	T	TGME49_218260	111	60	71	32	56	0.0163934	0.138889	0.030303	0.0175439	8.47222	0.578947
TGME49_218260:113	0	21	0	11	T	TGME49_218260	113	25	95	24	78	0.0384615	0.229167	0.04	0.151899	5.95833	3.79747	0	10	0	0	T	TGME49_218260	113	59	81	32	56	0.0166667	0.134146	0.030303	0.0175439	8.04878	0.578947
TGME49_218260:1221	0	13	2	10	T	TGME49_218260	1221	31	58	71	65	0.03125	0.237288	0.0416667	0.166667	7.59322	4	5	39	50	12	T	TGME49_218260	1221	294	278	145	135	0.020339	0.143369	0.349315	0.0955882	7.04898	0.273645
TGME49_218260:1270	0	12	0	2	T	TGME49_218260	1270	34	98	39	71	0.0285714	0.131313	0.025	0.0416667	4.59596	1.66667	0	23	0	0	T	TGME49_218260	1270	228	174	56	42	0.00436681	0.137143	0.0175439	0.0232558	31.4057	1.32558
TGME49_218260:362	0	24	1	26	T	TGME49_218260	362	67	130	41	161	0.0147059	0.19084	0.0476191	0.166667	12.9771	3.5	1	47	32	46	T	TGME49_218260	362	212	119	87	124	0.00938967	0.4	0.375	0.376	42.6	1.00267
TGME49_218260:683	0	17	2	4	T	TGME49_218260	683	59	81	32	96	0.0166667	0.219512	0.0909091	0.0515464	13.1707	0.56701	9	34	6	0	T	TGME49_218260	683	252	189	117	96	0.0395257	0.184211	0.059322	0.0103093	4.66053	0.173785
TGME49_218260:801	0	17	4	3	T	TGME49_218260	801	59	69	22	77	0.0166667	0.257143	0.217391	0.0512821	15.4286	0.235897	16	48	0	34	T	TGME49_218260	801	259	194	107	232	0.0653846	0.251282	0.00925926	0.150215	3.84314	16.2232
TGME49_218260:925	0	15	0	2	T	TGME49_218260	925	58	47	31	98	0.0169491	0.333333	0.03125	0.030303	19.6667	0.969697	0	40	0	0	T	TGME49_218260	925	120	89	2	40	0.00826446	0.455556	0.333333	0.0243902	55.1222	0.0731707
TGME49_218410:99	0	12	0	10	T	TGME49_218410	99	31	71	9	45	0.03125	0.180556	0.1	0.23913	5.77778	2.3913	4	13	0	0	T	TGME49_218410	99	111	48	160	18	0.0446429	0.285714	0.00621118	0.0526316	6.4	8.47368
TGME49_218520:3353	1	120	5	129	T	TGME49_218520	3353	47	192	36	205	0.0416667	0.626943	0.162162	0.631068	15.0466	3.89159	23	148	18	119	T	TGME49_218520	3353	325	384	59	330	0.0736196	0.387013	0.316667	0.362538	5.25693	1.14486
TGME49_218520:3380	0	12	0	4	T	TGME49_218520	3380	60	103	51	164	0.0163934	0.125	0.0192308	0.030303	7.625	1.57576	1	44	0	47	T	TGME49_218520	3380	297	162	220	168	0.00671141	0.276074	0.00452489	0.284024	41.135	62.7692
TGME49_218520:4326	0	13	0	0	T	TGME49_218520	4326	57	95	34	62	0.0172414	0.145833	0.0285714	0.015873	8.45833	0.555556	0	16	7	27	T	TGME49_218520	4326	45	126	42	144	0.0217391	0.133858	0.186047	0.193103	6.15748	1.03793
TGME49_218520:4594	0	21	5	6	T	TGME49_218520	4594	60	146	22	174	0.0163934	0.14966	0.26087	0.04	9.12925	0.153333	1	82	18	17	T	TGME49_218520	4594	303	264	141	89	0.00657895	0.313208	0.133803	0.2	47.6075	1.49474
TGME49_218520:4898	0	18	0	8	T	TGME49_218520	4898	47	108	59	187	0.0208333	0.174312	0.0166667	0.0478723	8.36697	2.87234	10	34	2	0	T	TGME49_218520	4898	170	131	159	11	0.0643275	0.265152	0.01875	0.0833333	4.1219	4.44444
TGME49_218740:82	0	6	0	5	T	TGME49_218740	82	18	30	9	48	0.0526316	0.225806	0.1	0.122449	4.29032	1.22449	0	7	0	0	T	TGME49_218740	82	41	20	28	31	0.0238095	0.380952	0.0344828	0.03125	16	0.90625
TGME49_218820:1232	0	13	0	17	T	TGME49_218820	1232	10	38	13	65	0.0909091	0.358974	0.0714286	0.272727	3.94872	3.81818	0	9	0	16	T	TGME49_218820	1232	69	26	40	41	0.0142857	0.37037	0.0243902	0.404762	25.9259	16.5952
TGME49_218820:274	0	16	0	10	T	TGME49_218820	274	35	46	16	36	0.0277778	0.361702	0.0588235	0.297297	13.0213	5.05405	1	75	0	22	T	TGME49_218820	274	59	123	31	114	0.0333333	0.612903	0.03125	0.2	18.3871	6.4
TGME49_218820:514	0	5	0	0	T	TGME49_218820	514	34	31	10	58	0.0285714	0.1875	0.0909091	0.0169491	6.5625	0.186441	0	12	26	0	T	TGME49_218820	514	80	106	151	42	0.0123457	0.121495	0.177632	0.0232558	9.84112	0.130922
TGME49_218820:908	0	6	4	0	T	TGME49_218820	908	61	47	29	11	0.016129	0.145833	0.166667	0.0833333	9.04167	0.5	0	20	0	20	T	TGME49_218820	908	182	138	67	66	0.00546448	0.151079	0.0147059	0.313433	27.6475	21.3134
TGME49_218960:1546	0	9	0	2	T	TGME49_218960	1546	8	14	2	5	0.111111	0.666667	0.333333	0.5	6	1.5	0	5	0	0	T	TGME49_218960	1546	17	15	9	2	0.0555556	0.375	0.1	0.333333	6.75	3.33333
TGME49_219120:4710	0	12	3	7	T	TGME49_219120	4710	28	26	15	29	0.0344828	0.481482	0.25	0.266667	13.963	1.06667	0	9	0	0	T	TGME49_219120	4710	46	30	25	15	0.0212766	0.322581	0.0384615	0.0625	15.1613	1.625
TGME49_219140:475	0	6	0	3	T	TGME49_219140	475	49	31	17	20	0.02	0.21875	0.0555556	0.190476	10.9375	3.42857	0	17	2	14	T	TGME49_219140	475	68	49	2	14	0.0144928	0.36	1	1	24.84	1
TGME49_219140:535	0	6	3	1	T	TGME49_219140	535	15	27	5	27	0.0625	0.25	0.666667	0.0714286	4	0.107143	0	10	0	0	T	TGME49_219140	535	56	49	27	50	0.0175439	0.22	0.0357143	0.0196078	12.54	0.54902
TGME49_219230:2069	0	5	0	2	T	TGME49_219230	2069	19	21	9	5	0.05	0.272727	0.1	0.5	5.45455	5	0	7	0	0	T	TGME49_219230	2069	63	50	1	97	0.015625	0.156863	0.5	0.0102041	10.0392	0.0204082
TGME49_219270:822	0	6	0	7	T	TGME49_219270	822	17	10	12	23	0.0555556	0.636364	0.0769231	0.333333	11.4545	4.33333	0	27	0	0	T	TGME49_219270	822	108	80	12	43	0.00917431	0.345679	0.0769231	0.0227273	37.679	0.295455
TGME49_219320:1541	0	5	1	1	T	TGME49_219320	1541	32	14	21	6	0.030303	0.4	0.0909091	0.285714	13.2	3.14286	0	30	32	64	T	TGME49_219320	1541	140	134	42	92	0.0070922	0.22963	0.767442	0.698925	32.3778	0.91072
TGME49_219320:2161	0	8	0	3	T	TGME49_219320	2161	28	17	21	12	0.0344828	0.5	0.0454546	0.307692	14.5	6.76923	5	23	0	5	T	TGME49_219320	2161	268	86	4	59	0.0223048	0.275862	0.2	0.1	12.3678	0.5
TGME49_219690:873	0	6	0	2	T	TGME49_219690	873	22	42	17	34	0.0434783	0.162791	0.0555556	0.0857143	3.74419	1.54286	0	7	0	0	T	TGME49_219690	873	11	23	7	68	0.0833333	0.333333	0.125	0.0144928	4	0.115942
TGME49_219750:435	0	8	0	0	T	TGME49_219750	435	41	36	4	10	0.0238095	0.243243	0.2	0.0909091	10.2162	0.454545	0	34	0	1	T	TGME49_219750	435	128	155	99	71	0.00775194	0.224359	0.01	0.0277778	28.9423	2.77778
TGME49_219800:344	0	9	0	14	T	TGME49_219800	344	7	16	5	16	0.125	0.588235	0.166667	0.882353	4.70588	5.29412	0	16	0	24	T	TGME49_219800	344	51	30	16	24	0.0192308	0.548387	0.0588235	1	28.5161	17
TGME49_219810:2707	0	22	0	3	T	TGME49_219810	2707	22	37	24	13	0.0434783	0.605263	0.04	0.285714	13.921	7.14286	0	30	0	0	T	TGME49_219810	2707	77	114	29	33	0.0128205	0.269565	0.0333333	0.0294118	21.0261	0.882353
TGME49_219810:2838	0	6	1	0	T	TGME49_219810	2838	23	37	20	41	0.0416667	0.18421	0.0952381	0.0238095	4.42105	0.25	0	10	0	21	T	TGME49_219810	2838	43	77	33	65	0.0227273	0.141026	0.0294118	0.333333	6.20513	11.3333
TGME49_219810:4704	0	8	5	0	T	TGME49_219810	4704	17	42	13	29	0.0555556	0.209302	0.428571	0.0333333	3.76744	0.0777778	0	22	0	12	T	TGME49_219810	4704	31	49	19	65	0.03125	0.46	0.05	0.19697	14.72	3.93939
TGME49_219820:1720	0	8	0	1	T	TGME49_219820	1720	15	35	14	33	0.0625	0.25	0.0666667	0.0588235	4	0.882353	3	11	0	3	T	TGME49_219820	1720	71	58	32	73	0.0555556	0.20339	0.030303	0.0540541	3.66102	1.78378
TGME49_219820:85	0	7	0	0	T	TGME49_219820	85	21	29	6	18	0.0454546	0.266667	0.142857	0.0526316	5.86667	0.368421	3	6	0	10	T	TGME49_219820	85	61	13	7	33	0.0645161	0.5	0.125	0.323529	7.75	2.58824
TGME49_220240:2414	0	6	8	4	T	TGME49_220240	2414	79	34	48	25	0.0125	0.2	0.183673	0.192308	16	1.04701	3	9	0	0	T	TGME49_220240	2414	157	47	66	65	0.0253165	0.208333	0.0149254	0.0151515	8.22917	1.01515
TGME49_220240:347	0	11	0	0	T	TGME49_220240	347	15	37	23	38	0.0625	0.31579	0.0416667	0.025641	5.05263	0.615385	0	7	0	32	T	TGME49_220240	347	150	64	69	59	0.00662252	0.123077	0.0142857	0.55	18.5846	38.5
TGME49_220400:7	0	12	0	10	T	TGME49_220400	7	40	42	36	58	0.0243902	0.302326	0.027027	0.186441	12.3954	6.8983	2	29	0	26	T	TGME49_220400	7	109	69	38	62	0.0272727	0.428571	0.025641	0.428571	15.7143	16.7143
TGME49_220400:85	0	20	0	4	T	TGME49_220400	85	110	134	52	145	0.00900901	0.155556	0.0188679	0.0342466	17.2667	1.81507	0	54	0	42	T	TGME49_220400	85	340	360	81	316	0.00293255	0.152355	0.0121951	0.135647	51.9529	11.123
TGME49_220640:1685	0	9	0	1	T	TGME49_220640	1685	40	37	16	9	0.0243902	0.263158	0.0588235	0.2	10.7895	3.4	0	12	0	0	T	TGME49_220640	1685	65	40	1	7	0.0151515	0.317073	0.5	0.125	20.9268	0.25
TGME49_220950:3669	0	24	0	18	T	TGME49_220950	3669	111	99	39	117	0.00892857	0.25	0.025	0.161017	28	6.44068	19	30	0	17	T	TGME49_220950	3669	178	78	67	111	0.111732	0.392405	0.0147059	0.160714	3.51203	10.9286
TGME49_220950:3845	0	36	0	15	T	TGME49_220950	3845	61	157	51	117	0.016129	0.234177	0.0192308	0.135593	14.519	7.05085	8	133	13	52	T	TGME49_220950	3845	291	342	137	177	0.0308219	0.390671	0.101449	0.297753	12.6751	2.93499
TGME49_220950:3870	0	17	4	16	T	TGME49_220950	3870	48	93	52	102	0.0204082	0.191489	0.0943396	0.165048	9.38298	1.74951	3	31	11	14	T	TGME49_220950	3870	498	217	87	222	0.00801603	0.146789	0.136364	0.0672646	18.3119	0.493274
TGME49_221210:824	0	8	0	8	T	TGME49_221210	824	60	44	19	37	0.0163934	0.2	0.05	0.236842	12.2	4.73684	2	20	0	0	T	TGME49_221210	824	84	105	27	114	0.0352941	0.198113	0.0357143	0.00869565	5.61321	0.243478
TGME49_221380:2155	0	8	0	0	T	TGME49_221380	2155	29	19	8	25	0.0333333	0.45	0.111111	0.0384615	13.5	0.346154	0	12	0	0	T	TGME49_221380	2155	119	40	56	30	0.00833333	0.317073	0.0175439	0.0322581	38.0488	1.83871
TGME49_221470:2211	0	6	0	0	T	TGME49_221470	2211	36	46	7	48	0.027027	0.148936	0.125	0.0204082	5.51064	0.163265	0	5	0	0	T	TGME49_221470	2211	13	11	27	11	0.0714286	0.5	0.0357143	0.0833333	7	2.33333
TGME49_221480:5329	0	5	1	0	T	TGME49_221480	5329	17	24	15	29	0.0555556	0.24	0.125	0.0333333	4.32	0.266667	0	5	0	0	T	TGME49_221480	5329	29	20	8	70	0.0333333	0.285714	0.111111	0.0140845	8.57143	0.126761
TGME49_221510:930	0	5	0	14	T	TGME49_221510	930	11	11	4	20	0.0833333	0.5	0.2	0.714286	6	3.57143	0	5	0	0	T	TGME49_221510	930	47	36	13	21	0.0208333	0.162162	0.0714286	0.0454545	7.78378	0.636364
TGME49_221590:3055	0	6	5	1	T	TGME49_221590	3055	15	30	20	16	0.0625	0.225806	0.285714	0.117647	3.6129	0.411765	0	11	0	0	T	TGME49_221590	3055	27	33	30	27	0.0357143	0.352941	0.0322581	0.0357143	9.88235	1.10714
TGME49_221905:670	0	8	0	0	T	TGME49_221905	670	24	40	9	24	0.04	0.219512	0.1	0.04	5.4878	0.4	0	15	0	0	T	TGME49_221905	670	44	40	7	16	0.0222222	0.390244	0.125	0.0588235	17.561	0.470588
TGME49_221910:1108	0	5	0	0	T	TGME49_221910	1108	29	47	28	19	0.0333333	0.125	0.0344828	0.05	3.75	1.45	1	17	0	0	T	TGME49_221910	1108	130	113	12	136	0.0152672	0.157895	0.0769231	0.00729927	10.3421	0.0948905
TGME49_221910:135	0	6	1	15	T	TGME49_221910	135	39	16	7	21	0.025	0.411765	0.25	0.727273	16.4706	2.90909	2	20	0	11	T	TGME49_221910	135	35	46	8	32	0.0833333	0.446809	0.111111	0.363636	5.3617	3.27273
TGME49_221910:512	0	10	2	7	T	TGME49_221910	512	8	23	11	15	0.111111	0.458333	0.25	0.5	4.125	2	0	13	0	0	T	TGME49_221910	512	42	50	9	48	0.0232558	0.27451	0.1	0.0204082	11.8039	0.204082
TGME49_221910:575	0	6	0	6	T	TGME49_221910	575	43	21	3	17	0.0227273	0.318182	0.25	0.388889	14	1.55556	0	9	0	0	T	TGME49_221910	575	91	30	92	6	0.0108696	0.322581	0.0107527	0.142857	29.6774	13.2857
TGME49_221910:590	0	23	2	24	T	TGME49_221910	590	6	47	6	45	0.142857	0.5	0.428571	0.543478	3.5	1.26812	0	28	0	0	T	TGME49_221910	590	64	100	57	8	0.0153846	0.287129	0.0172414	0.111111	18.6634	6.44444
TGME49_222220:1585	0	7	0	5	T	TGME49_222220	1585	37	31	24	24	0.0263158	0.25	0.04	0.24	9.5	6	0	40	0	38	T	TGME49_222220	1585	84	86	55	65	0.0117647	0.471264	0.0178571	0.590909	40.0575	33.0909
TGME49_222220:1659	0	12	1	1	T	TGME49_222220	1659	33	35	11	36	0.0294118	0.361111	0.166667	0.054054	12.2778	0.324324	5	22	15	20	T	TGME49_222220	1659	232	142	89	79	0.0257511	0.160839	0.177778	0.2625	6.24592	1.47656
TGME49_222220:1663	0	9	0	2	T	TGME49_222220	1663	33	43	2	41	0.0294118	0.227273	0.333333	0.0714286	7.72727	0.214286	0	31	13	1	T	TGME49_222220	1663	288	207	64	80	0.00346021	0.153846	0.215385	0.0246914	44.4615	0.114638
TGME49_222220:1664	0	5	0	0	T	TGME49_222220	1664	33	48	2	40	0.0294118	0.122449	0.333333	0.0243902	4.16326	0.0731707	10	41	3	0	T	TGME49_222220	1664	297	245	67	80	0.0369128	0.170732	0.0588235	0.0123457	4.62528	0.209877
TGME49_222220:2425	0	20	0	5	T	TGME49_222220	2425	21	56	22	35	0.0454546	0.368421	0.0434783	0.166667	8.10526	3.83333	23	79	23	22	T	TGME49_222220	2425	533	412	162	305	0.0449438	0.193705	0.147239	0.0751634	4.30993	0.510485
TGME49_222220:2799	0	13	2	9	T	TGME49_222220	2799	18	48	14	45	0.0526316	0.285714	0.2	0.217391	5.42857	1.08696	0	32	0	0	T	TGME49_222220	2799	222	232	89	62	0.00448431	0.141631	0.0111111	0.015873	31.5837	1.42857
TGME49_222220:3883	0	12	0	0	T	TGME49_222220	3883	39	46	8	7	0.025	0.276596	0.111111	0.125	11.0638	1.125	0	16	0	0	T	TGME49_222220	3883	84	71	37	79	0.0117647	0.236111	0.0263158	0.0125	20.0694	0.475
TGME49_222840:1347	0	5	0	1	T	TGME49_222840	1347	46	35	33	49	0.0212766	0.166667	0.0294118	0.04	7.83333	1.36	0	13	0	0	T	TGME49_222840	1347	228	79	27	55	0.00436681	0.175	0.0357143	0.0178571	40.075	0.5
TGME49_222840:1690	0	5	0	0	T	TGME49_222840	1690	41	34	13	18	0.0238095	0.171429	0.0714286	0.0526316	7.2	0.736842	0	8	1	0	T	TGME49_222840	1690	52	20	43	5	0.0188679	0.428571	0.0454545	0.166667	22.7143	3.66667
TGME49_223050:1213	0	13	0	2	T	TGME49_223050	1213	175	94	39	83	0.00568182	0.147368	0.025	0.0357143	25.9368	1.42857	14	66	0	0	T	TGME49_223050	1213	177	180	56	85	0.0842697	0.370166	0.0175439	0.0116279	4.39263	0.662791
TGME49_223050:1219	0	16	0	5	T	TGME49_223050	1219	120	102	33	73	0.00826446	0.165048	0.0294118	0.0810811	19.9709	2.75676	6	42	41	36	T	TGME49_223050	1219	260	301	103	90	0.0268199	0.142384	0.403846	0.406593	5.30889	1.0068
TGME49_223050:1269	0	10	6	2	T	TGME49_223050	1269	45	49	18	59	0.0217391	0.22	0.368421	0.05	10.12	0.135714	3	51	0	0	T	TGME49_223050	1269	449	222	236	138	0.00888889	0.233184	0.00421941	0.00719425	26.2332	1.70504
TGME49_223050:563	0	16	1	11	T	TGME49_223050	563	30	34	27	25	0.0322581	0.485714	0.0714286	0.461539	15.0571	6.46154	5	86	0	0	T	TGME49_223050	563	290	212	58	70	0.0206186	0.408451	0.0169492	0.0140845	19.8099	0.830986
TGME49_223410:778	0	8	0	4	T	TGME49_223410	778	20	22	11	9	0.0476191	0.391304	0.0833333	0.5	8.21739	6	0	10	0	13	T	TGME49_223410	778	22	26	40	30	0.0434783	0.407407	0.0243902	0.451613	9.37037	18.5161
TGME49_223590:1040	0	6	0	3	T	TGME49_223590	1040	36	11	7	8	0.027027	0.583333	0.125	0.444444	21.5833	3.55556	0	29	36	0	T	TGME49_223590	1040	72	130	73	51	0.0136986	0.229008	0.5	0.0192308	16.7176	0.0384615
TGME49_223590:734	0	5	7	1	T	TGME49_223590	734	20	13	14	7	0.0476191	0.428571	0.533333	0.25	9	0.46875	0	7	0	0	T	TGME49_223590	734	54	58	17	50	0.0181818	0.135593	0.0555556	0.0196078	7.45763	0.352941
TGME49_223590:837	0	6	0	0	T	TGME49_223590	837	27	28	5	3	0.0357143	0.241379	0.166667	0.25	6.75862	1.5	0	24	0	27	T	TGME49_223590	837	35	72	20	37	0.0277778	0.342466	0.047619	0.736842	12.3288	15.4737
TGME49_223660:2317	0	10	2	3	T	TGME49_223660	2317	106	53	15	31	0.00934579	0.203704	0.1875	0.125	21.7963	0.666667	0	17	0	0	T	TGME49_223660	2317	52	75	20	64	0.0188679	0.236842	0.047619	0.0153846	12.5526	0.323077
TGME49_223660:3286	0	9	0	3	T	TGME49_223660	3286	71	39	30	39	0.0138889	0.25	0.0322581	0.1	18	3.1	0	7	0	21	T	TGME49_223660	3286	80	48	27	53	0.0123457	0.163265	0.0357143	0.407407	13.2245	11.4074
TGME49_223680:596	0	7	0	0	T	TGME49_223680	596	12	12	5	2	0.0769231	0.615385	0.166667	0.333333	8	2	0	6	0	0	T	TGME49_223680	596	74	21	1	28	0.0133333	0.318182	0.5	0.0344828	23.8636	0.0689655
TGME49_223930:2734	0	7	0	0	T	TGME49_223930	2734	15	27	5	12	0.0625	0.285714	0.166667	0.0769231	4.57143	0.461539	0	6	0	0	T	TGME49_223930	2734	20	30	26	2	0.047619	0.225806	0.037037	0.333333	4.74194	9
TGME49_223940:2264	0	5	0	6	T	TGME49_223940	2264	42	23	14	58	0.0232558	0.25	0.0666667	0.118644	10.75	1.77966	1	20	12	0	T	TGME49_223940	2264	161	76	57	48	0.0123457	0.272727	0.224138	0.0204082	22.0909	0.0910518
TGME49_224130:589	0	6	0	2	T	TGME49_224130	589	46	20	21	15	0.0212766	0.333333	0.0454546	0.1875	15.6667	4.125	0	28	0	0	T	TGME49_224130	589	296	179	110	151	0.003367	0.161111	0.00900901	0.00657895	47.85	0.730263
TGME49_224130:711	0	15	0	8	T	TGME49_224130	711	52	52	21	33	0.0188679	0.301887	0.0454546	0.264706	16	5.82353	0	46	5	6	T	TGME49_224130	711	135	133	55	174	0.00735294	0.350746	0.107143	0.04	47.7015	0.373333
TGME49_224460:1065	0	15	0	7	T	TGME49_224460	1065	63	73	31	57	0.015625	0.216216	0.03125	0.137931	13.8378	4.41379	1	31	14	45	T	TGME49_224460	1065	145	166	66	157	0.0136986	0.191617	0.223881	0.291139	13.988	1.30042
TGME49_224460:1479	3	10	2	5	T	TGME49_224460	1479	133	69	31	56	0.0298507	0.157143	0.09375	0.105263	5.26429	1.12281	5	33	0	8	T	TGME49_224460	1479	143	183	67	84	0.0416667	0.184783	0.0147059	0.105882	4.43478	7.2
TGME49_224460:1532	0	11	7	4	T	TGME49_224460	1532	136	81	58	83	0.00729927	0.146342	0.135593	0.0595238	20.0488	0.438988	0	6	0	0	T	TGME49_224460	1532	84	47	43	102	0.0117647	0.145833	0.0227273	0.00970874	12.3958	0.427184
TGME49_224460:3170	0	6	0	8	T	TGME49_224460	3170	96	56	39	75	0.0103093	0.122807	0.025	0.118421	11.9123	4.73684	4	44	0	41	T	TGME49_224460	3170	322	196	55	160	0.0154799	0.228426	0.0178571	0.26087	14.7563	14.6087
TGME49_224460:3171	0	8	2	0	T	TGME49_224460	3171	96	62	41	75	0.0103093	0.142857	0.0714286	0.0131579	13.8571	0.18421	12	44	23	14	T	TGME49_224460	3171	334	240	78	174	0.038806	0.186722	0.303797	0.0857143	4.81168	0.282143
TGME49_224460:320	0	16	0	25	T	TGME49_224460	320	49	84	13	113	0.02	0.2	0.0714286	0.22807	10	3.19298	11	39	3	0	T	TGME49_224460	320	157	121	65	84	0.0759494	0.327869	0.0606061	0.0117647	4.31694	0.194118
TGME49_224460:3502	0	19	6	1	T	TGME49_224460	3502	108	93	41	61	0.00917431	0.212766	0.166667	0.0322581	23.1915	0.193548	0	12	10	14	T	TGME49_224460	3502	82	48	34	47	0.0120482	0.265306	0.314286	0.3125	22.0204	0.994318
TGME49_224460:3674	0	8	10	10	T	TGME49_224460	3674	96	42	32	66	0.0103093	0.209302	0.333333	0.164179	20.3023	0.492537	0	9	0	1	T	TGME49_224460	3674	58	67	59	30	0.0169492	0.147059	0.0166667	0.0645161	8.67647	3.87097
TGME49_224460:530	0	11	1	6	T	TGME49_224460	530	46	57	37	61	0.0212766	0.206897	0.0526316	0.112903	9.72414	2.14516	0	7	0	0	T	TGME49_224460	530	40	26	51	17	0.0243902	0.296296	0.0192308	0.0555556	12.1481	2.88889
TGME49_224460:544	0	39	0	31	T	TGME49_224460	544	61	130	38	125	0.016129	0.305343	0.025641	0.253968	18.9313	9.90476	0	8	0	25	T	TGME49_224460	544	83	66	136	28	0.0119048	0.134328	0.00729927	0.896552	11.2836	122.828
TGME49_224460:780	0	36	10	20	T	TGME49_224460	780	126	163	61	149	0.00787402	0.22561	0.177419	0.14	28.6524	0.789091	18	96	0	59	T	TGME49_224460	780	182	214	76	207	0.103825	0.451163	0.012987	0.288462	4.34541	22.2115
TGME49_224900:838	0	6	0	2	T	TGME49_224900	838	18	35	8	22	0.0526316	0.194444	0.111111	0.130435	3.69444	1.17391	0	12	0	0	T	TGME49_224900	838	110	79	98	69	0.00900901	0.1625	0.010101	0.0142857	18.0375	1.41429
TGME49_224900:956	0	12	0	4	T	TGME49_224900	956	11	23	1	6	0.0833333	0.541667	0.5	0.714286	6.5	1.42857	0	13	0	17	T	TGME49_224900	956	30	46	1	94	0.0322581	0.297872	0.5	0.189474	9.23404	0.378947
TGME49_225080:851	0	10	1	27	T	TGME49_225080	851	72	80	26	113	0.0136986	0.135802	0.0740741	0.245614	9.91358	3.31579	0	62	0	6	T	TGME49_225080	851	93	222	26	52	0.0106383	0.282511	0.037037	0.132075	26.5561	3.56604
TGME49_225080:951	0	11	0	3	T	TGME49_225080	951	26	52	27	52	0.037037	0.226415	0.0357143	0.0754717	6.11321	2.11321	24	44	0	39	T	TGME49_225080	951	693	262	284	226	0.0360231	0.171103	0.00350877	0.176211	4.74981	50.2203
TGME49_225120:1309	0	5	0	1	T	TGME49_225120	1309	21	33	13	25	0.0454546	0.176471	0.0714286	0.0769231	3.88235	1.07692	0	10	0	0	T	TGME49_225120	1309	43	26	73	58	0.0227273	0.407407	0.0135135	0.0169492	17.9259	1.25424
TGME49_225150:2717	0	5	0	0	T	TGME49_225150	2717	37	34	25	6	0.0263158	0.171429	0.0384615	0.142857	6.51429	3.71429	0	6	0	0	T	TGME49_225150	2717	11	14	16	19	0.0833333	0.466667	0.0588235	0.05	5.6	0.85
TGME49_225160:2199	0	7	0	1	T	TGME49_225160	2199	49	36	5	39	0.02	0.216216	0.166667	0.05	10.8108	0.3	2	13	0	19	T	TGME49_225160	2199	137	106	126	102	0.0217391	0.130841	0.00787402	0.194175	6.01869	24.6602
TGME49_225160:959	0	8	0	0	T	TGME49_225160	959	24	26	6	8	0.04	0.333333	0.142857	0.111111	8.33333	0.777778	0	30	0	58	T	TGME49_225160	959	230	148	137	208	0.004329	0.208054	0.00724638	0.282297	48.0604	38.9569
TGME49_225540:356	0	6	8	2	T	TGME49_225540	356	50	38	42	16	0.0196078	0.179487	0.209302	0.176471	9.15385	0.843137	0	5	0	0	T	TGME49_225540	356	50	39	13	22	0.0196078	0.15	0.0714286	0.0434783	7.65	0.608696
TGME49_225555:231	0	6	0	5	T	TGME49_225555	231	51	29	23	48	0.0192308	0.233333	0.0416667	0.122449	12.1333	2.93878	0	22	0	0	T	TGME49_225555	231	167	68	81	100	0.00595238	0.333333	0.0121951	0.00990099	56	0.811881
TGME49_225555:385	0	5	0	0	T	TGME49_225555	385	53	21	6	17	0.0185185	0.272727	0.142857	0.0555556	14.7273	0.388889	0	5	0	0	T	TGME49_225555	385	46	43	14	22	0.0212766	0.136364	0.0666667	0.0434783	6.40909	0.652174
TGME49_225930:197	0	6	0	8	T	TGME49_225930	197	33	38	7	34	0.0294118	0.179487	0.125	0.257143	6.10256	2.05714	0	17	0	0	T	TGME49_225930	197	109	95	42	74	0.00909091	0.1875	0.0232558	0.0133333	20.625	0.573333
TGME49_225930:200	0	6	0	2	T	TGME49_225930	200	53	41	11	34	0.0185185	0.166667	0.0833333	0.0857143	9	1.02857	0	42	11	35	T	TGME49_225930	200	109	140	52	109	0.00909091	0.304965	0.226415	0.327273	33.5461	1.44545
TGME49_226020:1193	0	7	0	1	T	TGME49_226020	1193	36	38	17	39	0.027027	0.205128	0.0555556	0.05	7.58974	0.9	0	8	0	0	T	TGME49_226020	1193	74	45	90	81	0.0133333	0.195652	0.010989	0.0121951	14.6739	1.10976
TGME49_226020:1243	0	6	0	0	T	TGME49_226020	1243	49	48	30	70	0.02	0.142857	0.0322581	0.0140845	7.14286	0.43662	4	32	0	33	T	TGME49_226020	1243	123	107	93	52	0.0403226	0.305556	0.0106383	0.641509	7.57778	60.3019
TGME49_226020:1317	0	5	0	1	T	TGME49_226020	1317	26	20	31	8	0.037037	0.285714	0.03125	0.222222	7.71429	7.11111	0	12	0	0	T	TGME49_226020	1317	82	93	26	27	0.0120482	0.138298	0.037037	0.0357143	11.4787	0.964286
TGME49_226020:1408	0	13	0	30	T	TGME49_226020	1408	57	82	28	74	0.0172414	0.168675	0.0344828	0.413333	9.78313	11.9867	0	8	0	0	T	TGME49_226020	1408	49	61	77	50	0.02	0.145161	0.0128205	0.0196078	7.25806	1.52941
TGME49_226020:1502	1	25	2	9	T	TGME49_226020	1502	78	108	37	140	0.0253165	0.238532	0.0789474	0.070922	9.42202	0.898345	9	22	0	38	T	TGME49_226020	1502	193	112	86	152	0.0515464	0.20354	0.0114943	0.254902	3.94867	22.1765
TGME49_226020:1926	0	13	2	11	T	TGME49_226020	1926	21	70	17	56	0.0454546	0.197183	0.166667	0.210526	4.33803	1.26316	7	31	29	20	T	TGME49_226020	1926	167	150	89	167	0.047619	0.211921	0.333333	0.125	4.45033	0.375
TGME49_226260:1376	0	5	0	5	T	TGME49_226260	1376	29	28	2	24	0.0333333	0.206897	0.333333	0.24	6.2069	0.72	0	9	0	0	T	TGME49_226260	1376	16	24	4	14	0.0588235	0.4	0.2	0.0666667	6.8	0.333333
TGME49_226380:777	0	5	1	0	T	TGME49_226380	777	13	22	17	31	0.0714286	0.26087	0.111111	0.03125	3.65217	0.28125	5	27	0	34	T	TGME49_226380	777	122	69	63	82	0.0487805	0.4	0.015625	0.421687	8.2	26.988
TGME49_226410:1281	0	5	0	1	T	TGME49_226410	1281	36	25	5	19	0.027027	0.230769	0.166667	0.1	8.53846	0.6	0	8	0	0	T	TGME49_226410	1281	36	56	36	16	0.027027	0.157895	0.027027	0.0588235	5.84211	2.17647
TGME49_226410:1326	0	15	0	1	T	TGME49_226410	1326	22	48	15	51	0.0434783	0.326531	0.0625	0.0384615	7.5102	0.615385	1	11	0	0	T	TGME49_226410	1326	96	76	1	88	0.0206186	0.155844	0.5	0.011236	7.55844	0.0224719
TGME49_226410:582	0	8	0	1	T	TGME49_226410	582	18	34	8	15	0.0526316	0.257143	0.111111	0.125	4.88571	1.125	1	30	0	0	T	TGME49_226410	582	345	211	41	102	0.00578035	0.146226	0.0238095	0.00970874	25.2972	0.407767
TGME49_226500:231	0	7	0	0	T	TGME49_226500	231	18	28	7	13	0.0526316	0.275862	0.125	0.0714286	5.24138	0.571429	4	22	0	0	T	TGME49_226500	231	93	78	28	105	0.0531915	0.291139	0.0344828	0.00943396	5.47342	0.273585
TGME49_226570:257	0	9	0	12	T	TGME49_226570	257	50	28	12	39	0.0196078	0.344828	0.0769231	0.325	17.5862	4.225	0	74	12	48	T	TGME49_226570	257	190	195	154	110	0.0052356	0.382653	0.083871	0.441441	73.0867	5.26334
TGME49_226570:284	0	13	0	4	T	TGME49_226570	284	14	39	40	55	0.0666667	0.35	0.0243902	0.0892857	5.25	3.66071	23	162	0	145	T	TGME49_226570	284	374	344	132	228	0.064	0.472464	0.0075188	0.637555	7.38225	84.7948
TGME49_226570:370	0	38	4	61	T	TGME49_226570	370	33	72	18	108	0.0294118	0.534247	0.263158	0.568807	18.1644	2.16147	19	507	37	179	T	TGME49_226570	370	567	790	206	391	0.0352113	0.642225	0.183575	0.459184	18.2392	2.50134
TGME49_226570:412	0	7	3	15	T	TGME49_226570	412	50	35	17	23	0.0196078	0.222222	0.222222	0.666667	11.3333	3	27	101	0	74	T	TGME49_226570	412	414	327	144	215	0.0674699	0.310976	0.00689655	0.347222	4.6091	50.3472
TGME49_226570:605	0	25	0	3	T	TGME49_226570	605	62	61	16	30	0.015873	0.419355	0.0588235	0.129032	26.4194	2.19355	2	105	0	5	T	TGME49_226570	605	95	189	28	37	0.03125	0.557895	0.0344828	0.157895	17.8526	4.57895
TGME49_226830:6625	0	5	0	1	T	TGME49_226830	6625	27	15	2	7	0.0357143	0.375	0.333333	0.25	10.5	0.75	0	30	0	2	T	TGME49_226830	6625	68	57	2	48	0.0144928	0.534483	0.333333	0.0612245	36.8793	0.183673
TGME49_226860:1470	0	8	0	3	T	TGME49_226860	1470	30	40	15	23	0.0322581	0.219512	0.0625	0.166667	6.80488	2.66667	0	6	28	0	T	TGME49_226860	1470	69	25	43	62	0.0142857	0.269231	0.659091	0.015873	18.8462	0.0240832
TGME49_226860:2210	0	13	0	6	T	TGME49_226860	2210	101	59	26	45	0.00980392	0.233333	0.037037	0.152174	23.8	4.1087	0	12	1	0	T	TGME49_226860	2210	34	37	29	22	0.0285714	0.342105	0.0666667	0.0434783	11.9737	0.652174
TGME49_226860:2590	0	6	0	0	T	TGME49_226860	2590	14	28	15	35	0.0666667	0.241379	0.0625	0.0277778	3.62069	0.444444	0	6	0	13	T	TGME49_226860	2590	68	19	37	13	0.0144928	0.35	0.0263158	1	24.15	38
TGME49_226960:2084	0	8	0	7	T	TGME49_226960	2084	12	18	16	33	0.0769231	0.473684	0.0588235	0.235294	6.15789	4	0	10	0	0	T	TGME49_226960	2084	52	51	65	18	0.0188679	0.211538	0.0151515	0.0526316	11.2115	3.47368
TGME49_226960:653	0	5	0	4	T	TGME49_226960	653	34	22	16	10	0.0285714	0.26087	0.0588235	0.454545	9.13044	7.72727	0	30	0	55	T	TGME49_226960	653	77	88	2	112	0.0128205	0.348315	0.333333	0.495575	27.1685	1.48673
TGME49_226970:1511	0	6	0	3	T	TGME49_226970	1511	18	21	5	26	0.0526316	0.318182	0.166667	0.148148	6.04545	0.888889	0	7	28	0	T	TGME49_226970	1511	29	60	28	88	0.0333333	0.131148	1	0.011236	3.93443	0.011236
TGME49_226970:1858	1	22	0	14	T	TGME49_226970	1858	81	128	72	63	0.0243902	0.178295	0.0136986	0.234375	7.31008	17.1094	10	30	0	0	T	TGME49_226970	1858	349	255	130	300	0.0314286	0.121094	0.00763359	0.00332226	3.85298	0.435216
TGME49_226970:2042	0	11	5	9	T	TGME49_226970	2042	47	72	27	80	0.0208333	0.164384	0.214286	0.123457	7.89041	0.576132	1	41	0	35	T	TGME49_226970	2042	151	179	8	45	0.0131579	0.233333	0.111111	0.782609	17.7333	7.04348
TGME49_227280:2976	0	35	8	19	T	TGME49_227280	2976	165	245	112	263	0.0060241	0.146342	0.079646	0.0757576	24.2927	0.951179	26	111	1	58	T	TGME49_227280	2976	762	797	231	650	0.0353866	0.140351	0.00862069	0.0906298	3.96621	10.5131
TGME49_227280:3195	0	26	4	21	T	TGME49_227280	3195	147	130	83	95	0.00675676	0.206107	0.0595238	0.229167	30.5038	3.85	17	76	5	52	T	TGME49_227280	3195	607	573	251	462	0.0296053	0.134146	0.0238095	0.114471	4.53117	4.80778
TGME49_227280:3255	0	41	9	32	T	TGME49_227280	3255	51	200	70	282	0.0192308	0.208955	0.140845	0.116608	10.8657	0.827915	9	60	12	32	T	TGME49_227280	3255	397	490	129	425	0.0251256	0.124236	0.1	0.0774648	4.9446	0.774648
TGME49_227280:4012	0	10	2	1	T	TGME49_227280	4012	36	65	32	37	0.027027	0.166667	0.0909091	0.0526316	6.16667	0.578947	2	38	6	29	T	TGME49_227280	4012	213	276	106	208	0.0140187	0.140794	0.0654206	0.143541	10.0433	2.19412
TGME49_227280:4232	1	15	0	16	T	TGME49_227280	4232	85	106	50	53	0.0232558	0.149533	0.0196078	0.314815	6.42991	16.0556	11	39	1	25	T	TGME49_227280	4232	181	130	120	94	0.0659341	0.305344	0.0165289	0.273684	4.63104	16.5579
TGME49_227360:1452	0	17	0	11	T	TGME49_227360	1452	117	123	30	111	0.00847458	0.145161	0.0322581	0.107143	17.129	3.32143	11	100	36	54	T	TGME49_227360	1452	605	376	239	178	0.019802	0.267905	0.154167	0.307263	13.5292	1.99305
TGME49_227360:1472	0	51	8	38	T	TGME49_227360	1472	89	186	84	166	0.0111111	0.278075	0.105882	0.233533	25.0267	2.20559	47	216	0	43	T	TGME49_227360	1472	727	814	118	338	0.0659341	0.266258	0.00840336	0.129794	4.03824	15.4454
TGME49_227360:1690	0	24	0	32	T	TGME49_227360	1690	74	112	59	61	0.0133333	0.221239	0.0166667	0.532258	16.5929	31.9355	3	118	0	11	T	TGME49_227360	1690	738	802	191	550	0.00541272	0.148194	0.00520833	0.0217786	27.3789	4.18149
TGME49_227360:1889	0	82	3	101	T	TGME49_227360	1889	97	170	35	209	0.0102041	0.48538	0.111111	0.485714	47.5673	4.37143	3	262	53	145	T	TGME49_227360	1889	467	581	143	369	0.00854701	0.45189	0.375	0.394595	52.8711	1.05225
TGME49_227360:896	0	20	0	9	T	TGME49_227360	896	49	127	52	120	0.02	0.164062	0.0188679	0.0826446	8.20312	4.38016	9	108	10	32	T	TGME49_227360	896	334	434	11	236	0.0298507	0.250575	0.916667	0.139241	8.39425	0.151899
TGME49_227380:2526	0	7	0	1	T	TGME49_227380	2526	20	42	4	28	0.0476191	0.186047	0.2	0.0689655	3.90698	0.344828	0	18	29	0	T	TGME49_227380	2526	45	92	109	40	0.0217391	0.204301	0.272727	0.0243902	9.39785	0.0894309
TGME49_227380:3628	0	6	0	0	T	TGME49_227380	3628	31	24	12	36	0.03125	0.28	0.0769231	0.027027	8.96	0.351351	0	6	0	32	T	TGME49_227380	3628	6	13	39	32	0.142857	0.5	0.025	1	3.5	40
TGME49_227380:378	0	5	0	1	T	TGME49_227380	378	66	30	8	25	0.0149254	0.193548	0.111111	0.0769231	12.9677	0.692308	0	8	0	0	T	TGME49_227380	378	92	51	32	46	0.0107527	0.173077	0.030303	0.0212766	16.0962	0.702128
TGME49_227600:140	0	7	4	10	T	TGME49_227600	140	25	35	12	36	0.0384615	0.222222	0.384615	0.297297	5.77778	0.772973	2	88	0	0	T	TGME49_227600	140	864	441	199	180	0.00346821	0.201357	0.005	0.00552486	58.0581	1.10497
TGME49_227600:217	0	20	0	10	T	TGME49_227600	217	22	83	12	65	0.0434783	0.25	0.0769231	0.166667	5.75	2.16667	1	45	0	36	T	TGME49_227600	217	514	371	183	208	0.00388349	0.123656	0.00543478	0.177033	31.8414	32.5742
TGME49_227600:568	0	22	6	10	T	TGME49_227600	568	76	133	48	131	0.012987	0.171642	0.142857	0.0833333	13.2164	0.583333	0	52	0	23	T	TGME49_227600	568	459	412	59	176	0.00217391	0.128329	0.0166667	0.135593	59.0315	8.13559
TGME49_227620:1046	4	139	11	116	T	TGME49_227620	1046	700	766	316	838	0.00713267	0.182529	0.0378549	0.139452	25.5906	3.68385	25	242	0	137	T	TGME49_227620	1046	881	1314	367	792	0.0294785	0.184791	0.00271739	0.174023	6.26868	64.0404
TGME49_227620:1172	87	631	43	387	T	TGME49_227620	1172	1109	1551	503	1222	0.0792793	0.407216	0.0873016	0.317253	5.13648	3.63399	97	515	1	374	T	TGME49_227620	1172	2034	1986	609	1001	0.0481572	0.259688	0.00327869	0.374251	5.3925	114.147
TGME49_227620:359	0	24	0	10	T	TGME49_227620	359	53	82	24	33	0.0185185	0.301205	0.04	0.323529	16.2651	8.08823	26	36	27	16	T	TGME49_227620	359	660	147	988	185	0.0408472	0.25	0.0283114	0.0913978	6.12037	3.2283
TGME49_227620:438	6	392	30	300	T	TGME49_227620	438	1439	1593	751	1282	0.00486111	0.24655	0.0412234	0.234606	50.7188	5.6911	342	616	63	267	T	TGME49_227620	438	15850	4685	5037	3038	0.021639	0.131669	0.0127035	0.0881869	6.08479	6.94196
TGME49_227620:523	36	511	32	478	T	TGME49_227620	523	520	1547	463	1494	0.0710173	0.330749	0.0711207	0.320401	4.65731	4.50504	110	545	37	345	T	TGME49_227620	523	3017	3961	1362	2984	0.0367793	0.137809	0.0278797	0.115913	3.74692	4.15761
TGME49_227620:646	0	130	30	68	T	TGME49_227620	646	1288	1048	717	1015	0.000775795	0.124881	0.0431755	0.0679134	160.971	1.57296	241	1005	56	552	T	TGME49_227620	646	2902	3389	727	1535	0.083362	0.296755	0.0782967	0.360026	3.55984	4.59823
TGME49_227620:690	0	156	15	98	T	TGME49_227620	690	1213	1300	636	954	0.000823723	0.120676	0.0251177	0.103665	146.501	4.12716	167	652	27	196	T	TGME49_227620	690	3566	3861	832	2229	0.0470984	0.169083	0.0336134	0.0883408	3.59	2.62814
TGME49_227620:990	24	209	25	115	T	TGME49_227620	990	548	902	335	590	0.0455373	0.232558	0.077381	0.196277	5.10698	2.53651	211	868	55	534	T	TGME49_227620	990	4266	4950	1380	3082	0.0496836	0.17552	0.0405503	0.173532	3.53276	4.27943
TGME49_227810:1849	0	9	0	1	T	TGME49_227810	1849	38	19	5	12	0.025641	0.5	0.166667	0.153846	19.5	0.923077	0	9	27	0	T	TGME49_227810	1849	65	66	27	34	0.0151515	0.149254	1	0.0285714	9.85075	0.0285714
TGME49_227810:2910	0	5	4	0	T	TGME49_227810	2910	17	22	4	15	0.0555556	0.26087	1	0.0625	4.69565	0.0625	1	12	0	0	T	TGME49_227810	2910	60	40	34	26	0.0327869	0.317073	0.0285714	0.037037	9.67073	1.2963
TGME49_228170:1107	0	5	3	0	T	TGME49_228170	1107	32	16	6	8	0.030303	0.352941	0.571429	0.111111	11.6471	0.194444	0	8	0	0	T	TGME49_228170	1107	55	56	52	33	0.0178571	0.157895	0.0188679	0.0294118	8.84211	1.55882
TGME49_228170:2393	0	8	0	0	T	TGME49_228170	2393	78	27	10	13	0.0126582	0.321429	0.0909091	0.0714286	25.3929	0.785714	0	6	0	0	T	TGME49_228170	2393	93	52	62	113	0.0106383	0.132075	0.015873	0.00877193	12.4151	0.552632
TGME49_228170:359	0	9	0	0	T	TGME49_228170	359	14	38	8	45	0.0666667	0.25641	0.111111	0.0217391	3.84615	0.195652	0	10	0	0	T	TGME49_228170	359	61	51	40	1	0.016129	0.211538	0.0243902	0.5	13.1154	20.5
TGME49_228170:796	0	11	3	18	T	TGME49_228170	796	14	22	11	37	0.0666667	0.521739	0.333333	0.5	7.82609	1.5	0	18	0	2	T	TGME49_228170	796	94	49	10	30	0.0105263	0.38	0.0909091	0.0967742	36.1	1.06452
TGME49_228760:1126	0	11	0	5	T	TGME49_228760	1126	37	19	4	22	0.0263158	0.6	0.2	0.26087	22.8	1.30435	0	7	0	20	T	TGME49_228760	1126	57	26	16	40	0.0172414	0.296296	0.0588235	0.512195	17.1852	8.70732
TGME49_228760:1621	0	6	0	0	T	TGME49_228760	1621	64	22	5	44	0.0153846	0.304348	0.166667	0.0222222	19.7826	0.133333	0	10	0	0	T	TGME49_228760	1621	41	20	19	42	0.0238095	0.52381	0.05	0.0232558	22	0.465116
TGME49_228760:2270	0	5	0	0	T	TGME49_228760	2270	15	15	20	22	0.0625	0.375	0.0476191	0.0434783	6	0.913044	0	10	0	0	T	TGME49_228760	2270	30	65	3	36	0.0322581	0.166667	0.25	0.027027	5.16667	0.108108
TGME49_229000:2373	0	8	1	0	T	TGME49_229000	2373	15	25	1	10	0.0625	0.346154	1	0.0909091	5.53846	0.0909091	0	13	0	0	T	TGME49_229000	2373	22	55	23	11	0.0434783	0.25	0.0416667	0.0833333	5.75	2
TGME49_229010:4126	0	5	0	0	T	TGME49_229010	4126	14	16	6	11	0.0666667	0.352941	0.142857	0.0833333	5.29412	0.583333	0	9	0	0	T	TGME49_229010	4126	56	27	43	74	0.0175439	0.357143	0.0227273	0.0133333	20.3571	0.586667
TGME49_229010:4129	0	6	0	0	T	TGME49_229010	4129	14	21	6	11	0.0666667	0.318182	0.142857	0.0833333	4.77273	0.583333	0	7	0	2	T	TGME49_229010	4129	56	37	43	83	0.0175439	0.210526	0.0227273	0.0357143	12	1.57143
TGME49_229250:640	0	24	0	8	T	TGME49_229250	640	21	71	7	26	0.0454546	0.347222	0.125	0.333333	7.63889	2.66667	2	43	0	7	T	TGME49_229250	640	143	223	65	20	0.0208333	0.196429	0.0151515	0.380952	9.42857	25.1429
TGME49_229250:713	0	19	0	1	T	TGME49_229250	713	62	53	7	19	0.015873	0.37037	0.125	0.1	23.3333	0.8	0	11	0	13	T	TGME49_229250	713	89	88	57	130	0.0111111	0.134831	0.0172414	0.10687	12.1348	6.19847
TGME49_229250:874	0	12	6	12	T	TGME49_229250	874	101	70	33	79	0.00980392	0.183099	0.205882	0.1625	18.6761	0.789286	4	42	0	15	T	TGME49_229250	874	248	173	81	106	0.0200803	0.247126	0.0121951	0.149533	12.3069	12.2617
TGME49_229480:1292	0	6	7	0	T	TGME49_229480	1292	30	26	18	11	0.0322581	0.259259	0.421053	0.0833333	8.03704	0.197917	7	30	2	25	T	TGME49_229480	1292	200	206	65	117	0.039801	0.149758	0.0454545	0.220339	3.76268	4.84746
TGME49_229480:194	0	23	4	4	T	TGME49_229480	194	23	60	45	76	0.0416667	0.393443	0.108696	0.0649351	9.44262	0.597403	10	61	0	25	T	TGME49_229480	194	95	114	39	44	0.114583	0.53913	0.025	0.577778	4.70514	23.1111
TGME49_229480:235	0	13	2	17	T	TGME49_229480	235	36	37	50	38	0.027027	0.368421	0.0588235	0.461539	13.6316	7.84615	2	10	0	0	T	TGME49_229480	235	113	70	59	35	0.0263158	0.15493	0.0166667	0.0277778	5.88732	1.66667
TGME49_229480:473	0	54	6	23	T	TGME49_229480	473	34	78	16	61	0.0285714	0.696202	0.411765	0.387097	24.3671	0.940092	12	101	0	24	T	TGME49_229480	473	204	200	44	51	0.0634146	0.507463	0.0222222	0.480769	8.0023	21.6346
TGME49_229670:235	0	20	3	11	T	TGME49_229670	235	86	88	48	64	0.0114942	0.235955	0.0816327	0.184615	20.5281	2.26154	27	81	1	0	T	TGME49_229670	235	654	471	103	277	0.0427481	0.173729	0.0192308	0.00359712	4.06401	0.18705
TGME49_229670:269	0	11	0	5	T	TGME49_229670	269	66	97	24	56	0.0149254	0.122449	0.04	0.105263	8.20408	2.63158	4	58	0	32	T	TGME49_229670	269	339	476	214	197	0.0147059	0.12369	0.00465116	0.166667	8.4109	35.8333
TGME49_229670:368	0	51	9	39	T	TGME49_229670	368	82	152	78	94	0.0120482	0.339869	0.126582	0.421053	28.2092	3.32632	51	310	44	161	T	TGME49_229670	368	1076	847	348	601	0.0482823	0.366745	0.12894	0.269103	7.59586	2.08704
TGME49_229930:209	0	9	3	3	T	TGME49_229930	209	36	70	10	44	0.027027	0.140845	0.363636	0.0888889	5.21127	0.244444	0	21	0	3	T	TGME49_229930	209	197	124	25	17	0.00505051	0.176	0.0384615	0.222222	34.848	5.77778
TGME49_229930:710	0	8	0	3	T	TGME49_229930	710	58	67	19	41	0.0169491	0.132353	0.05	0.0952381	7.80882	1.90476	0	21	0	0	T	TGME49_229930	710	130	156	56	60	0.00763359	0.140127	0.0175439	0.0163934	18.3567	0.934426
TGME49_229930:718	0	37	2	17	T	TGME49_229930	718	32	99	13	68	0.030303	0.38	0.214286	0.26087	12.54	1.21739	28	117	0	29	T	TGME49_229930	718	315	344	64	113	0.0917722	0.342029	0.0153846	0.263158	3.72694	17.1053
TGME49_229930:755	0	7	0	0	T	TGME49_229930	755	28	41	33	14	0.0344828	0.190476	0.0294118	0.0666667	5.52381	2.26667	0	14	0	0	T	TGME49_229930	755	163	123	83	46	0.00609756	0.120968	0.0119048	0.0212766	19.8387	1.78723
TGME49_229930:845	0	11	0	0	T	TGME49_229930	845	67	44	29	23	0.0147059	0.266667	0.0333333	0.0416667	18.1333	1.25	4	5	0	10	T	TGME49_229930	845	132	39	26	16	0.037594	0.15	0.037037	0.647059	3.99	17.4706
TGME49_229930:854	0	6	4	3	T	TGME49_229930	854	35	50	32	26	0.0277778	0.137255	0.151515	0.148148	4.94118	0.977778	0	11	0	0	T	TGME49_229930	854	115	66	53	32	0.00862069	0.179104	0.0185185	0.030303	20.7761	1.63636
TGME49_230160:154	0	27	2	18	T	TGME49_230160	154	117	144	71	198	0.00847458	0.193103	0.0416667	0.0954774	22.7862	2.29146	1	41	0	0	T	TGME49_230160	154	330	301	58	129	0.0060423	0.139073	0.0169492	0.00769231	23.0166	0.453846
TGME49_230160:225	1	66	16	43	T	TGME49_230160	225	229	262	90	156	0.00869565	0.254753	0.186813	0.280255	29.2966	1.50019	31	144	0	139	T	TGME49_230160	225	534	493	132	332	0.0598131	0.293522	0.0075188	0.42042	4.90733	55.9159
TGME49_230180:1142	1	7	0	1	T	TGME49_230180	1142	68	65	14	38	0.0289855	0.121212	0.0666667	0.0512821	4.18182	0.769231	0	6	0	0	T	TGME49_230180	1142	90	21	28	35	0.010989	0.318182	0.0344828	0.0277778	28.9545	0.805556
TGME49_230180:1620	0	9	0	12	T	TGME49_230180	1620	17	33	13	36	0.0555556	0.294118	0.0714286	0.351351	5.29412	4.91892	0	11	0	0	T	TGME49_230180	1620	98	38	11	56	0.010101	0.307692	0.0833333	0.0175439	30.4615	0.210526
TGME49_230180:1687	0	18	13	7	T	TGME49_230180	1687	47	70	40	76	0.0208333	0.267606	0.341463	0.103896	12.8451	0.304267	0	10	0	0	T	TGME49_230180	1687	59	70	46	79	0.0166667	0.15493	0.0212766	0.0125	9.29577	0.5875
TGME49_230180:1858	1	14	4	7	T	TGME49_230180	1858	27	43	20	47	0.0714286	0.340909	0.238095	0.166667	4.77273	0.7	3	10	26	7	T	TGME49_230180	1858	84	48	37	69	0.0470588	0.22449	0.710526	0.114286	4.77041	0.160847
TGME49_230180:249	0	12	0	0	T	TGME49_230180	249	57	89	13	51	0.0172414	0.144444	0.0714286	0.0192308	8.37778	0.269231	2	19	0	0	T	TGME49_230180	249	64	59	51	16	0.0461538	0.333333	0.0192308	0.0588235	7.22222	3.05882
TGME49_230180:3322	0	7	0	1	T	TGME49_230180	3322	35	65	25	87	0.0277778	0.121212	0.0384615	0.0227273	4.36364	0.590909	0	9	0	0	T	TGME49_230180	3322	51	49	5	16	0.0192308	0.2	0.166667	0.0588235	10.4	0.352941
TGME49_230180:348	0	16	0	0	T	TGME49_230180	348	172	104	13	81	0.00578035	0.161905	0.0714286	0.0121951	28.0095	0.170732	4	12	0	0	T	TGME49_230180	348	69	44	13	37	0.0714286	0.288889	0.0714286	0.0263158	4.04444	0.368421
TGME49_230180:624	0	8	0	5	T	TGME49_230180	624	19	46	7	43	0.05	0.191489	0.125	0.136364	3.82979	1.09091	0	9	0	0	T	TGME49_230180	624	46	43	67	30	0.0212766	0.227273	0.0147059	0.0322581	10.6818	2.19355
TGME49_230210:788	0	9	0	0	T	TGME49_230210	788	15	21	12	26	0.0625	0.454545	0.0769231	0.037037	7.27273	0.481482	1	16	44	0	T	TGME49_230210	788	22	43	80	31	0.0869565	0.386364	0.555556	0.03125	4.44318	0.05625
TGME49_230380:1263	0	5	0	4	T	TGME49_230380	1263	26	37	13	47	0.037037	0.157895	0.0714286	0.104167	4.26316	1.45833	1	20	0	0	T	TGME49_230380	1263	131	109	132	82	0.0151515	0.190909	0.0075188	0.0120482	12.6	1.60241
TGME49_230380:152	0	19	1	35	T	TGME49_230380	152	51	71	46	97	0.0192308	0.277778	0.0425532	0.367347	14.4444	8.63265	0	40	0	22	T	TGME49_230380	152	45	163	111	53	0.0217391	0.25	0.00892857	0.425926	11.5	47.7037
TGME49_230380:302	0	13	0	2	T	TGME49_230380	302	33	39	17	32	0.0294118	0.35	0.0555556	0.0909091	11.9	1.63636	1	29	12	6	T	TGME49_230380	302	169	186	85	141	0.0117647	0.160428	0.151163	0.0492958	13.6364	0.326111
TGME49_230380:552	0	7	0	0	T	TGME49_230380	552	59	26	6	20	0.0166667	0.296296	0.142857	0.0476191	17.7778	0.333333	0	18	0	0	T	TGME49_230380	552	79	50	21	17	0.0125	0.372549	0.0454545	0.0555556	29.8039	1.22222
TGME49_230380:763	0	7	0	2	T	TGME49_230380	763	21	30	12	10	0.0454546	0.258064	0.0769231	0.272727	5.67742	3.54546	0	18	1	23	T	TGME49_230380	763	69	127	35	48	0.0142857	0.148438	0.0555556	0.489796	10.3906	8.81633
TGME49_230380:883	0	6	3	1	T	TGME49_230380	883	35	35	17	16	0.0277778	0.194444	0.222222	0.117647	7	0.529412	0	6	0	0	T	TGME49_230380	883	88	55	55	62	0.011236	0.125	0.0178571	0.015873	11.125	0.888889
TGME49_230940:3376	0	5	0	1	T	TGME49_230940	3376	20	24	2	5	0.0476191	0.24	0.333333	0.333333	5.04	1	0	18	0	0	T	TGME49_230940	3376	19	43	47	39	0.05	0.431818	0.0208333	0.025	8.63636	1.2
TGME49_231080:260	7	138	13	83	T	TGME49_231080	260	70	221	67	147	0.112676	0.626126	0.205882	0.567568	5.55687	2.75676	42	222	0	108	T	TGME49_231080	260	403	546	85	220	0.106436	0.407678	0.0116279	0.493213	3.83028	42.4163
TGME49_231080:482	0	69	4	60	T	TGME49_231080	482	261	234	67	322	0.00381679	0.297872	0.0735294	0.188855	78.0426	2.56842	3	80	0	0	T	TGME49_231080	482	388	244	57	54	0.0102828	0.330612	0.0172414	0.0181818	32.152	1.05455
TGME49_231080:493	15	83	1	25	T	TGME49_231080	493	310	328	92	301	0.0514469	0.255319	0.0215054	0.0860927	4.96277	4.00331	38	134	0	2	T	TGME49_231080	493	539	411	27	50	0.0722222	0.32767	0.0357143	0.0588235	4.53697	1.64706
TGME49_231140:1109	3	29	3	27	T	TGME49_231140	1109	70	125	53	116	0.056338	0.238095	0.0740741	0.239316	4.22619	3.23077	91	315	0	175	T	TGME49_231140	1109	1146	1124	414	518	0.0802092	0.280889	0.00240964	0.339114	3.50195	140.732
TGME49_231160:1066	0	8	0	0	T	TGME49_231160	1066	6	16	1	32	0.142857	0.529412	0.5	0.030303	3.70588	0.0606061	3	8	0	0	T	TGME49_231160	1066	78	39	29	5	0.0506329	0.225	0.0333333	0.166667	4.44375	5
TGME49_231640:3013	0	5	0	0	T	TGME49_231640	3013	13	17	17	19	0.0714286	0.333333	0.0555556	0.05	4.66667	0.9	0	5	0	0	T	TGME49_231640	3013	62	33	47	39	0.015873	0.176471	0.0208333	0.025	11.1176	1.2
TGME49_231640:655	0	5	0	0	T	TGME49_231640	655	25	12	1	19	0.0384615	0.461539	0.5	0.05	12	0.1	0	5	0	0	T	TGME49_231640	655	65	38	4	1	0.0151515	0.153846	0.2	0.5	10.1538	2.5
TGME49_231850:1641	0	15	0	13	T	TGME49_231850	1641	26	75	5	25	0.037037	0.210526	0.166667	0.538462	5.68421	3.23077	0	12	0	7	T	TGME49_231850	1641	20	30	26	7	0.047619	0.419355	0.037037	1	8.80645	27
TGME49_231850:1779	0	5	0	8	T	TGME49_231850	1779	49	34	34	47	0.02	0.171429	0.0285714	0.1875	8.57143	6.5625	1	9	1	6	T	TGME49_231850	1779	56	44	2	45	0.0350877	0.222222	0.666667	0.152174	6.33333	0.228261
TGME49_231850:1831	0	6	4	21	T	TGME49_231850	1831	65	31	25	50	0.0151515	0.21875	0.192308	0.431372	14.4375	2.24314	0	8	0	0	T	TGME49_231850	1831	45	57	31	8	0.0217391	0.155172	0.03125	0.111111	7.13793	3.55556
TGME49_231850:335	0	11	0	6	T	TGME49_231850	335	13	15	6	13	0.0714286	0.75	0.142857	0.5	10.5	3.5	4	15	0	0	T	TGME49_231850	335	78	47	13	74	0.0632911	0.333333	0.0714286	0.0133333	5.26667	0.186667
TGME49_231850:459	0	7	0	1	T	TGME49_231850	459	35	30	15	11	0.0277778	0.258064	0.0625	0.166667	9.29032	2.66667	0	10	0	0	T	TGME49_231850	459	92	33	40	50	0.0107527	0.323529	0.0243902	0.0196078	30.0882	0.803922
TGME49_231850:563	1	14	1	11	T	TGME49_231850	563	25	47	30	40	0.0769231	0.3125	0.0645161	0.292683	4.0625	4.53658	0	34	0	45	T	TGME49_231850	563	40	86	32	62	0.0243902	0.402299	0.030303	0.730159	16.4943	24.0952
TGME49_231850:780	0	22	2	34	T	TGME49_231850	780	21	46	11	62	0.0454546	0.489362	0.25	0.555556	10.766	2.22222	0	34	0	66	T	TGME49_231850	780	35	94	47	138	0.0277778	0.368421	0.0208333	0.482014	13.2632	23.1367
TGME49_231850:889	0	8	0	15	T	TGME49_231850	889	53	51	15	56	0.0185185	0.173077	0.0625	0.280702	9.34615	4.49123	0	17	0	0	T	TGME49_231850	889	24	76	27	48	0.04	0.233766	0.0357143	0.0204082	5.84416	0.571429
TGME49_232000:1063	0	6	0	0	T	TGME49_232000	1063	21	12	2	8	0.0454546	0.538462	0.333333	0.111111	11.8461	0.333333	0	24	0	29	T	TGME49_232000	1063	20	50	21	29	0.047619	0.490196	0.0454545	1	10.2941	22
TGME49_232030:209	0	7	0	0	T	TGME49_232030	209	16	22	7	8	0.0588235	0.347826	0.125	0.111111	5.91304	0.888889	0	5	0	0	T	TGME49_232030	209	36	36	19	50	0.027027	0.162162	0.05	0.0196078	6	0.392157
TGME49_232230:726	0	7	0	10	T	TGME49_232230	726	30	50	14	95	0.0322581	0.156863	0.0666667	0.114583	4.86275	1.71875	0	37	0	0	T	TGME49_232230	726	186	268	108	148	0.00534759	0.141264	0.00917431	0.00671141	26.4164	0.731544
TGME49_232250:1218	0	6	1	2	T	TGME49_232250	1218	26	40	22	48	0.037037	0.170732	0.0869565	0.0612245	4.60976	0.704082	1	15	25	0	T	TGME49_232250	1218	128	85	81	95	0.0155039	0.186047	0.317073	0.0104167	12	0.0328526
TGME49_232250:266	0	11	11	2	T	TGME49_232250	266	21	46	21	42	0.0454546	0.255319	0.545454	0.0697674	5.61702	0.127907	1	19	0	5	T	TGME49_232250	266	86	85	19	157	0.0229885	0.232558	0.05	0.0379747	10.1163	0.759494
TGME49_232250:349	0	8	0	1	T	TGME49_232250	349	86	66	11	51	0.0114942	0.134328	0.0833333	0.0384615	11.6866	0.461539	0	12	0	18	T	TGME49_232250	349	32	54	28	72	0.030303	0.236364	0.0344828	0.260274	7.8	7.54795
TGME49_232250:435	0	7	0	18	T	TGME49_232250	435	24	49	30	28	0.04	0.16	0.0322581	0.655172	4	20.3103	1	21	0	0	T	TGME49_232250	435	168	152	38	164	0.0118343	0.143791	0.025641	0.00606061	12.1503	0.236364
TGME49_232250:455	0	7	0	16	T	TGME49_232250	455	17	35	18	64	0.0555556	0.222222	0.0526316	0.261539	4	4.96923	0	17	0	8	T	TGME49_232250	455	21	98	18	55	0.0454545	0.181818	0.0526316	0.160714	4	3.05357
TGME49_232250:549	1	15	1	1	T	TGME49_232250	549	33	46	7	13	0.0588235	0.340425	0.25	0.142857	5.78723	0.571429	0	16	0	0	T	TGME49_232250	549	145	133	43	73	0.00684931	0.126866	0.0227273	0.0135135	18.5224	0.594595
TGME49_232250:888	0	8	2	0	T	TGME49_232250	888	109	60	26	64	0.00909091	0.147541	0.111111	0.0153846	16.2295	0.138461	0	10	0	0	T	TGME49_232250	888	106	88	11	44	0.00934579	0.123596	0.0833333	0.0222222	13.2247	0.266667
TGME49_232300:1052	0	25	0	23	T	TGME49_232300	1052	108	151	35	102	0.00917431	0.171053	0.0277778	0.23301	18.6447	8.38835	17	114	0	39	T	TGME49_232300	1052	532	629	194	527	0.0337711	0.18254	0.00512821	0.0757576	5.4052	14.7727
TGME49_232300:1138	0	21	6	19	T	TGME49_232300	1138	64	101	41	79	0.0153846	0.215686	0.166667	0.25	14.0196	1.5	17	62	0	29	T	TGME49_232300	1138	335	293	65	183	0.0535714	0.214286	0.0151515	0.163043	4	10.7609
TGME49_232300:816	0	11	1	7	T	TGME49_232300	816	40	82	46	73	0.0243902	0.144578	0.0425532	0.108108	5.92771	2.54054	9	43	41	0	T	TGME49_232300	816	347	341	295	280	0.0287356	0.128655	0.141892	0.00355872	4.47719	0.0250805
TGME49_232340:168	0	17	0	4	T	TGME49_232340	168	34	38	7	15	0.0285714	0.461539	0.125	0.3125	16.1538	2.5	0	10	0	16	T	TGME49_232340	168	20	18	51	17	0.047619	0.578947	0.0192308	0.944444	12.1579	49.1111
TGME49_232350:1407	0	10	0	1	T	TGME49_232350	1407	37	33	18	39	0.0263158	0.323529	0.0526316	0.05	12.2941	0.95	0	19	0	16	T	TGME49_232350	1407	140	84	218	119	0.0070922	0.235294	0.00456621	0.141667	33.1765	31.025
TGME49_232350:398	0	10	0	15	T	TGME49_232350	398	32	28	23	50	0.030303	0.37931	0.0416667	0.313725	12.5172	7.52941	23	79	0	62	T	TGME49_232350	398	343	222	458	460	0.0697674	0.358744	0.00217865	0.136659	5.142	62.7267
TGME49_232350:472	0	22	11	15	T	TGME49_232350	472	28	39	30	79	0.0344828	0.575	0.387097	0.2	16.675	0.516667	0	22	5	53	T	TGME49_232350	472	77	111	76	81	0.0128205	0.205357	0.0779221	0.658537	16.0179	8.45122
TGME49_232350:532	0	9	9	13	T	TGME49_232350	532	34	50	58	63	0.0285714	0.196078	0.169491	0.21875	6.86275	1.29062	0	17	14	3	T	TGME49_232350	532	175	119	123	185	0.00568182	0.15	0.120968	0.0215054	26.4	0.177778
TGME49_232350:692	0	8	1	4	T	TGME49_232350	692	16	21	27	40	0.0588235	0.409091	0.0714286	0.121951	6.95455	1.70732	0	71	0	84	T	TGME49_232350	692	209	314	270	414	0.00476191	0.228571	0.00369004	0.204819	48	55.506
TGME49_232350:778	0	16	0	1	T	TGME49_232350	778	15	50	13	42	0.0625	0.333333	0.0714286	0.0465116	5.33333	0.651163	0	30	0	16	T	TGME49_232350	778	75	85	117	191	0.0131579	0.360465	0.00847458	0.0885417	27.3953	10.4479
TGME49_232350:997	0	13	0	28	T	TGME49_232350	997	15	45	26	85	0.0625	0.304348	0.037037	0.337209	4.86956	9.10465	0	19	0	70	T	TGME49_232350	997	233	108	100	331	0.0042735	0.183486	0.00990099	0.213855	42.9358	21.5994
TGME49_232410:1073	0	20	3	9	T	TGME49_232410	1073	78	73	21	99	0.0126582	0.283784	0.181818	0.1	22.4189	0.55	1	64	0	12	T	TGME49_232410	1073	202	284	71	239	0.00985222	0.22807	0.0138889	0.0541667	23.1491	3.9
TGME49_232410:1673	0	8	0	7	T	TGME49_232410	1673	31	40	23	57	0.03125	0.219512	0.0416667	0.137931	7.02439	3.31034	4	74	0	8	T	TGME49_232410	1673	147	206	24	56	0.0337838	0.362319	0.04	0.157895	10.7246	3.94737
TGME49_232630:322	0	9	0	1	T	TGME49_232630	322	18	32	2	29	0.0526316	0.30303	0.333333	0.0666667	5.75758	0.2	0	25	0	0	T	TGME49_232630	322	90	98	170	89	0.010989	0.262626	0.00584795	0.0111111	23.899	1.9
TGME49_232630:617	0	7	0	7	T	TGME49_232630	617	11	16	16	10	0.0833333	0.470588	0.0588235	0.727273	5.64706	12.3636	0	13	0	4	T	TGME49_232630	617	111	59	26	9	0.00892857	0.233333	0.037037	0.5	26.1333	13.5
TGME49_232660:221	0	5	0	0	T	TGME49_232660	221	21	27	18	13	0.0454546	0.214286	0.0526316	0.0714286	4.71429	1.35714	0	10	0	0	T	TGME49_232660	221	25	43	8	37	0.0384615	0.25	0.111111	0.0263158	6.5	0.236842
TGME49_232670:1406	0	11	0	7	T	TGME49_232670	1406	13	39	8	58	0.0714286	0.3	0.111111	0.135593	4.2	1.22034	0	20	31	10	T	TGME49_232670	1406	29	66	31	49	0.0333333	0.313433	1	0.22	9.40299	0.22
TGME49_232670:1601	0	7	5	4	T	TGME49_232670	1601	14	30	11	35	0.0666667	0.258064	0.5	0.138889	3.87097	0.277778	0	11	0	25	T	TGME49_232670	1601	50	91	122	28	0.0196078	0.130435	0.00813008	0.896552	6.65217	110.276
TGME49_232670:1768	0	6	1	14	T	TGME49_232670	1768	79	41	6	47	0.0125	0.166667	0.285714	0.3125	13.3333	1.09375	0	7	0	0	T	TGME49_232670	1768	32	58	22	12	0.030303	0.135593	0.0434783	0.0769231	4.47458	1.76923
TGME49_232670:191	0	11	0	6	T	TGME49_232670	191	18	32	4	33	0.0526316	0.363636	0.2	0.205882	6.90909	1.02941	0	7	0	0	T	TGME49_232670	191	102	38	18	9	0.00970874	0.205128	0.0526316	0.1	21.1282	1.9
TGME49_232670:2134	0	8	0	0	T	TGME49_232670	2134	75	31	11	23	0.0131579	0.28125	0.0833333	0.0416667	21.375	0.5	0	8	0	0	T	TGME49_232670	2134	48	65	5	85	0.0204082	0.136364	0.166667	0.0116279	6.68182	0.0697674
TGME49_232710:717	0	29	0	4	T	TGME49_232710	717	53	77	45	19	0.0185185	0.384615	0.0217391	0.25	20.7692	11.5	13	46	0	0	T	TGME49_232710	717	401	345	138	103	0.0348259	0.135838	0.00719425	0.00961539	3.9005	1.33654
TGME49_232710:725	0	21	4	29	T	TGME49_232710	725	33	100	65	71	0.0294118	0.217822	0.0757576	0.416667	7.40594	5.5	7	88	1	50	T	TGME49_232710	725	127	356	74	94	0.0625	0.2493	0.0266667	0.536842	3.9888	20.1316
TGME49_232710:794	0	26	6	17	T	TGME49_232710	794	118	166	76	58	0.00840336	0.161677	0.0909091	0.305085	19.2395	3.35593	0	57	2	5	T	TGME49_232710	794	388	413	54	93	0.00257069	0.140097	0.0545455	0.0638298	54.4976	1.17021
TGME49_232710:888	0	14	0	11	T	TGME49_232710	888	86	89	24	91	0.0114942	0.166667	0.04	0.130435	14.5	3.26087	1	55	0	49	T	TGME49_232710	888	330	208	103	157	0.0060423	0.267943	0.00961539	0.316456	44.3445	32.9114
TGME49_232710:970	0	28	0	28	T	TGME49_232710	970	60	120	23	73	0.0163934	0.239669	0.0416667	0.391892	14.6198	9.40541	29	79	0	58	T	TGME49_232710	970	687	481	185	419	0.0436047	0.165975	0.00537634	0.140476	3.80636	26.1286
TGME49_232710:987	1	56	5	26	T	TGME49_232710	987	75	160	41	115	0.0263158	0.354037	0.142857	0.232759	13.4534	1.62931	44	138	0	102	T	TGME49_232710	987	633	515	181	412	0.0709779	0.26938	0.00549451	0.249395	3.79526	45.3898
TGME49_232940:1027	0	21	1	7	T	TGME49_232940	1027	159	143	101	177	0.00625	0.152778	0.0196078	0.0449438	24.4444	2.29214	0	32	0	11	T	TGME49_232940	1027	115	134	3	114	0.00862069	0.244444	0.25	0.104348	28.3556	0.417391
TGME49_232940:184	0	12	6	14	T	TGME49_232940	184	29	63	14	72	0.0333333	0.203125	0.466667	0.20548	6.09375	0.440313	9	47	0	9	T	TGME49_232940	184	269	214	61	124	0.037037	0.223256	0.016129	0.08	6.02791	4.96
TGME49_232940:232	0	10	0	17	T	TGME49_232940	232	47	49	24	51	0.0208333	0.22	0.04	0.346154	10.56	8.65385	0	5	6	0	T	TGME49_232940	232	38	48	13	43	0.025641	0.122449	0.5	0.0227273	4.77551	0.0454545
TGME49_232940:257	0	24	3	14	T	TGME49_232940	257	30	60	36	43	0.0322581	0.409836	0.108108	0.340909	12.7049	3.15341	1	17	1	6	T	TGME49_232940	257	76	56	17	59	0.025974	0.315789	0.111111	0.116667	12.1579	1.05
TGME49_232940:339	0	14	1	7	T	TGME49_232940	339	34	56	7	26	0.0285714	0.263158	0.25	0.296296	9.21053	1.18518	0	15	0	0	T	TGME49_232940	339	75	104	62	52	0.0131579	0.152381	0.015873	0.0188679	11.581	1.18868
TGME49_232940:529	0	7	0	12	T	TGME49_232940	529	28	37	5	28	0.0344828	0.210526	0.166667	0.448276	6.10526	2.68966	0	10	0	0	T	TGME49_232940	529	54	74	11	34	0.0181818	0.146667	0.0833333	0.0285714	8.06667	0.342857
TGME49_233380:1318	0	9	2	1	T	TGME49_233380	1318	42	41	19	38	0.0232558	0.238095	0.15	0.0512821	10.2381	0.34188	0	13	0	16	T	TGME49_233380	1318	56	57	19	47	0.0175439	0.241379	0.05	0.354167	13.7586	7.08333
TGME49_233380:1785	0	9	0	10	T	TGME49_233380	1785	108	51	17	72	0.00917431	0.192308	0.0555556	0.150685	20.9615	2.71233	0	20	0	2	T	TGME49_233380	1785	61	75	13	29	0.016129	0.276316	0.0714286	0.1	17.1316	1.4
TGME49_233380:1948	0	11	9	7	T	TGME49_233380	1948	57	52	31	61	0.0172414	0.226415	0.3125	0.129032	13.1321	0.412903	0	13	0	0	T	TGME49_233380	1948	97	39	73	43	0.0102041	0.35	0.0135135	0.0227273	34.3	1.68182
TGME49_233380:2045	0	8	0	0	T	TGME49_233380	2045	46	73	62	37	0.0212766	0.121622	0.015873	0.0263158	5.71622	1.65789	0	11	0	30	T	TGME49_233380	2045	48	46	38	63	0.0204082	0.255319	0.025641	0.484375	12.5106	18.8906
TGME49_233380:2199	0	8	0	5	T	TGME49_233380	2199	87	49	52	34	0.0113636	0.18	0.0188679	0.171429	15.84	9.08571	0	12	23	18	T	TGME49_233380	2199	56	82	23	71	0.0175439	0.156627	1	0.263889	8.92771	0.263889
TGME49_233380:2306	0	15	8	0	T	TGME49_233380	2306	107	47	41	30	0.00925926	0.333333	0.214286	0.0322581	36	0.150538	5	47	0	41	T	TGME49_233380	2306	167	172	47	178	0.0357143	0.277457	0.0208333	0.234637	7.76879	11.2626
TGME49_233380:2355	0	8	1	5	T	TGME49_233380	2355	67	45	10	47	0.0147059	0.195652	0.181818	0.125	13.3043	0.6875	0	20	0	0	T	TGME49_233380	2355	82	57	71	34	0.0120482	0.362069	0.0138889	0.0285714	30.0517	2.05714
TGME49_233380:2790	0	8	0	7	T	TGME49_233380	2790	36	54	10	53	0.027027	0.163636	0.0909091	0.148148	6.05455	1.62963	0	21	0	10	T	TGME49_233380	2790	32	95	5	98	0.030303	0.229167	0.166667	0.111111	7.5625	0.666667
TGME49_233380:3084	0	11	0	9	T	TGME49_233380	3084	23	42	33	57	0.0416667	0.27907	0.0294118	0.172414	6.69767	5.86207	0	12	0	15	T	TGME49_233380	3084	101	103	165	73	0.00980392	0.125	0.0060241	0.216216	12.75	35.8919
TGME49_233380:3135	5	22	1	8	T	TGME49_233380	3135	144	66	25	44	0.0413793	0.343284	0.0769231	0.2	8.29602	2.6	2	15	0	1	T	TGME49_233380	3135	47	39	19	41	0.0625	0.4	0.05	0.047619	6.4	0.952381
TGME49_233380:3326	0	7	2	7	T	TGME49_233380	3326	48	47	12	37	0.0204082	0.166667	0.230769	0.210526	8.16667	0.912281	0	45	0	33	T	TGME49_233380	3326	144	78	48	61	0.00689655	0.582278	0.0204082	0.548387	84.4304	26.871
TGME49_233380:3914	0	9	0	9	T	TGME49_233380	3914	16	39	12	42	0.0588235	0.25	0.0769231	0.232558	4.25	3.02326	0	10	0	0	T	TGME49_233380	3914	75	87	68	61	0.0131579	0.125	0.0144928	0.016129	9.5	1.1129
TGME49_233380:4233	0	5	8	12	T	TGME49_233380	4233	47	30	13	34	0.0208333	0.193548	0.642857	0.371429	9.29032	0.577778	5	18	0	7	T	TGME49_233380	4233	110	74	42	47	0.0540541	0.253333	0.0232558	0.166667	4.68667	7.16667
TGME49_233380:4359	0	11	1	15	T	TGME49_233380	4359	33	49	16	103	0.0294118	0.24	0.117647	0.153846	8.16	1.30769	0	8	0	0	T	TGME49_233380	4359	47	46	32	25	0.0208333	0.191489	0.030303	0.0384615	9.19149	1.26923
TGME49_233380:4610	0	9	0	4	T	TGME49_233380	4610	73	54	36	67	0.0135135	0.181818	0.027027	0.0735294	13.4545	2.72059	0	33	0	0	T	TGME49_233380	4610	173	86	68	17	0.00574713	0.390805	0.0144928	0.0555556	68	3.83333
TGME49_233380:5109	0	21	4	11	T	TGME49_233380	5109	36	70	20	64	0.027027	0.309859	0.238095	0.184615	11.4648	0.775385	0	14	0	0	T	TGME49_233380	5109	65	47	66	6	0.0151515	0.3125	0.0149254	0.142857	20.625	9.57143
TGME49_233380:5279	0	15	0	11	T	TGME49_233380	5279	51	70	36	79	0.0192308	0.225352	0.027027	0.15	11.7183	5.55	0	18	0	0	T	TGME49_233380	5279	64	78	54	44	0.0153846	0.240506	0.0181818	0.0222222	15.6329	1.22222
TGME49_233380:5442	0	18	5	13	T	TGME49_233380	5442	69	68	32	105	0.0142857	0.275362	0.181818	0.132076	19.2754	0.726415	0	8	38	0	T	TGME49_233380	5442	17	35	69	26	0.0555556	0.25	0.557143	0.037037	4.5	0.0664767
TGME49_233380:5479	0	11	0	28	T	TGME49_233380	5479	31	76	3	123	0.03125	0.155844	0.25	0.233871	4.98701	0.935484	0	13	0	0	T	TGME49_233380	5479	19	52	47	33	0.05	0.264151	0.0208333	0.0294118	5.28302	1.41176
TGME49_233380:895	0	7	6	3	T	TGME49_233380	895	32	42	16	48	0.030303	0.186047	0.411765	0.0816327	6.13954	0.198251	0	10	0	4	T	TGME49_233380	895	81	79	20	136	0.0121951	0.1375	0.047619	0.0364963	11.275	0.766423
TGME49_233450:215	0	15	8	13	T	TGME49_233450	215	54	81	51	82	0.0181818	0.195122	0.173077	0.168675	10.7317	0.974565	0	21	0	8	T	TGME49_233450	215	95	91	36	100	0.0104167	0.23913	0.027027	0.0891089	22.9565	3.29703
TGME49_233450:282	0	8	3	3	T	TGME49_233450	282	166	61	29	84	0.00598802	0.145161	0.133333	0.0470588	24.2419	0.352941	4	33	0	0	T	TGME49_233450	282	105	156	14	81	0.0471698	0.216561	0.0666667	0.0121951	4.59108	0.182927
TGME49_233450:77	0	10	3	11	T	TGME49_233450	77	29	83	73	165	0.0333333	0.130952	0.054054	0.0722892	3.92857	1.33735	0	32	26	107	T	TGME49_233450	77	138	106	79	170	0.00719425	0.308411	0.3375	0.631579	42.8692	1.87135
TGME49_233450:859	0	9	14	29	T	TGME49_233450	859	111	80	98	152	0.00892857	0.123457	0.151515	0.196078	13.8272	1.29412	16	61	17	102	T	TGME49_233450	859	501	328	227	309	0.0338645	0.18845	0.0789474	0.332258	5.56481	4.2086
TGME49_233450:990	0	8	0	33	T	TGME49_233450	990	55	32	14	71	0.0178571	0.272727	0.0666667	0.472222	15.2727	7.08333	8	45	18	34	T	TGME49_233450	990	205	206	119	189	0.0436893	0.222222	0.158333	0.184211	5.08642	1.16343
TGME49_233460:330	16	113	11	66	T	TGME49_233460	330	247	357	108	275	0.0685484	0.318436	0.110092	0.242754	4.64542	2.20501	210	781	76	483	T	TGME49_233460	330	2483	2571	856	1935	0.0849436	0.304044	0.0898483	0.25	3.57936	2.78247
TGME49_233460:434	14	121	8	54	T	TGME49_233460	434	259	326	171	239	0.0576923	0.373089	0.0523256	0.229167	6.46687	4.37963	50	731	13	331	T	TGME49_233460	434	1551	1932	285	1107	0.0328608	0.378686	0.048951	0.299639	11.5239	6.1212
TGME49_233480:1077	0	94	20	53	T	TGME49_233480	1077	415	337	179	405	0.00240385	0.281065	0.116667	0.133005	116.923	1.14004	0	51	4	47	T	TGME49_233480	1077	456	387	196	363	0.00218818	0.134021	0.0253807	0.131868	61.2474	5.1956
TGME49_233480:246	0	58	10	28	T	TGME49_233480	246	94	272	87	177	0.0105263	0.216117	0.125	0.162921	20.5311	1.30337	46	58	88	17	T	TGME49_233480	246	1156	325	1167	440	0.0406223	0.180982	0.0761986	0.0408163	4.45523	0.535657
TGME49_233480:331	10	120	17	100	T	TGME49_233480	331	255	407	172	491	0.0429688	0.296569	0.104046	0.205285	6.90196	1.97301	128	434	100	212	T	TGME49_233480	331	1925	1328	1073	895	0.0669782	0.327314	0.094041	0.237723	4.88687	2.52787
TGME49_233480:335	0	189	15	237	T	TGME49_233480	335	255	593	169	716	0.00390625	0.319865	0.0941176	0.331939	81.8855	3.52685	168	701	131	619	T	TGME49_233480	335	2032	2180	1254	1601	0.0831284	0.321871	0.105179	0.387016	3.87197	3.67959
TGME49_233480:396	16	104	21	104	T	TGME49_233480	396	283	326	183	472	0.0598591	0.321101	0.119565	0.221987	5.36427	1.85662	31	230	12	270	T	TGME49_233480	396	1432	1480	950	1471	0.0223308	0.155976	0.0136698	0.184103	6.98479	13.4679
TGME49_233480:470	10	114	0	68	T	TGME49_233480	470	371	633	142	438	0.0295699	0.181388	0.00699301	0.157175	6.13421	22.4761	18	168	22	87	T	TGME49_233480	470	1734	1136	671	894	0.010951	0.148637	0.0342262	0.098324	13.5729	2.87277
TGME49_233480:475	10	115	6	37	T	TGME49_233480	475	288	811	121	555	0.0380623	0.142857	0.057377	0.0683453	3.75325	1.19116	57	277	2	192	T	TGME49_233480	475	1602	1326	577	1163	0.0361822	0.209495	0.00519031	0.165808	5.79001	31.9456
TGME49_233480:670	17	109	0	113	T	TGME49_233480	670	321	439	94	409	0.0559006	0.25	0.0105263	0.278049	4.47222	26.4146	19	331	13	155	T	TGME49_233480	670	453	898	159	777	0.0440529	0.369299	0.0875	0.200514	8.38309	2.29159
TGME49_233500:2394	0	6	0	0	T	TGME49_233500	2394	32	36	21	36	0.030303	0.189189	0.0454546	0.027027	6.24324	0.594595	5	27	0	4	T	TGME49_233500	2394	96	94	22	44	0.0618557	0.294737	0.0434783	0.111111	4.76491	2.55556
TGME49_234180:1907	0	7	0	4	T	TGME49_234180	1907	24	25	2	18	0.04	0.307692	0.333333	0.263158	7.69231	0.789474	0	7	0	19	T	TGME49_234180	1907	43	26	18	19	0.0227273	0.296296	0.0526316	1	13.037	19
TGME49_234180:353	0	6	2	1	T	TGME49_234180	353	23	35	12	25	0.0416667	0.194444	0.230769	0.0769231	4.66667	0.333333	0	7	10	0	T	TGME49_234180	353	36	26	10	20	0.027027	0.296296	1	0.047619	10.963	0.047619
TGME49_234180:517	0	10	0	0	T	TGME49_234180	517	9	25	11	28	0.1	0.423077	0.0833333	0.0344828	4.23077	0.413793	0	9	0	0	T	TGME49_234180	517	30	33	54	10	0.0322581	0.294118	0.0181818	0.0909091	9.11765	5
TGME49_234450:1049	0	10	0	5	T	TGME49_234450	1049	50	46	43	55	0.0196078	0.234043	0.0227273	0.107143	11.9362	4.71429	1	15	38	16	T	TGME49_234450	1049	192	109	113	45	0.0103627	0.145455	0.342105	0.369565	14.0364	1.08027
TGME49_234450:1074	0	45	10	34	T	TGME49_234450	1074	95	136	61	116	0.0104167	0.335766	0.177419	0.299145	32.2336	1.68609	26	176	30	59	T	TGME49_234450	1074	276	368	170	171	0.0974729	0.479675	0.181287	0.348837	4.92111	1.92423
TGME49_234450:675	1	12	0	0	T	TGME49_234450	675	33	59	14	41	0.0588235	0.216667	0.0666667	0.0238095	3.68333	0.357143	3	58	0	14	T	TGME49_234450	675	792	411	381	214	0.00504414	0.143204	0.0026178	0.0697674	28.3902	26.6512
TGME49_235470:1659	0	10	11	9	T	TGME49_235470	1659	87	49	34	38	0.0113636	0.22	0.342857	0.25641	19.36	0.747863	0	24	11	39	T	TGME49_235470	1659	59	78	57	78	0.0166667	0.316456	0.206897	0.506329	18.9873	2.44726
TGME49_235470:1864	0	8	0	0	T	TGME49_235470	1864	33	29	12	20	0.0294118	0.3	0.0769231	0.0476191	10.2	0.619048	0	20	0	0	T	TGME49_235470	1864	99	94	87	61	0.01	0.221053	0.0113636	0.016129	22.1053	1.41935
TGME49_235470:2745	0	8	0	9	T	TGME49_235470	2745	29	22	21	28	0.0333333	0.391304	0.0454546	0.344828	11.7391	7.58621	0	8	0	0	T	TGME49_235470	2745	136	56	86	31	0.00729927	0.157895	0.0114943	0.03125	21.6316	2.71875
TGME49_235470:2814	0	7	0	0	T	TGME49_235470	2814	25	26	1	13	0.0384615	0.296296	0.5	0.0714286	7.7037	0.142857	0	7	0	0	T	TGME49_235470	2814	61	56	105	57	0.016129	0.140351	0.00943396	0.0172414	8.70175	1.82759
TGME49_235470:2817	0	7	0	2	T	TGME49_235470	2817	25	32	3	15	0.0384615	0.242424	0.25	0.1875	6.30303	0.75	0	8	0	25	T	TGME49_235470	2817	44	44	105	63	0.0222222	0.2	0.00943396	0.40625	9	43.0625
TGME49_235470:3510	0	20	3	21	T	TGME49_235470	3510	16	39	19	47	0.0588235	0.525	0.2	0.458333	8.925	2.29167	0	17	0	0	T	TGME49_235470	3510	29	44	2	60	0.0333333	0.4	0.333333	0.0163934	12	0.0491803
TGME49_235470:3670	0	9	0	0	T	TGME49_235470	3670	18	39	8	24	0.0526316	0.25	0.111111	0.04	4.75	0.36	0	6	15	40	T	TGME49_235470	3670	42	53	42	40	0.0232558	0.12963	0.372093	1	5.57407	2.6875
TGME49_235930:1858	0	10	0	6	T	TGME49_235930	1858	31	28	4	37	0.03125	0.37931	0.2	0.18421	12.1379	0.921053	0	33	0	0	T	TGME49_235930	1858	36	88	17	48	0.027027	0.382022	0.0555556	0.0204082	14.1348	0.367347
TGME49_235930:526	0	10	0	0	T	TGME49_235930	526	40	30	14	15	0.0243902	0.354839	0.0666667	0.0625	14.5484	0.9375	6	20	30	1	T	TGME49_235930	526	61	52	45	30	0.112903	0.396226	0.673913	0.0645161	3.50943	0.0957336
TGME49_236010:3928	0	5	0	0	T	TGME49_236010	3928	33	38	16	22	0.0294118	0.153846	0.0588235	0.0434783	5.23077	0.73913	0	7	0	0	T	TGME49_236010	3928	46	49	56	19	0.0212766	0.16	0.0175439	0.05	7.52	2.85
TGME49_236040:1015	0	8	11	14	T	TGME49_236040	1015	57	50	58	61	0.0172414	0.176471	0.20339	0.241935	10.2353	1.18952	0	18	2	60	T	TGME49_236040	1015	163	135	43	165	0.00609756	0.139706	0.0681818	0.36747	22.9118	5.38956
TGME49_236040:1290	0	13	2	2	T	TGME49_236040	1290	79	56	48	48	0.0125	0.245614	0.0612245	0.0612245	19.6491	1	10	75	36	32	T	TGME49_236040	1290	342	475	295	368	0.03207	0.159664	0.125	0.0894309	4.97861	0.715447
TGME49_236040:1614	0	7	0	6	T	TGME49_236040	1614	24	22	6	20	0.04	0.347826	0.142857	0.333333	8.69565	2.33333	0	29	1	27	T	TGME49_236040	1614	200	163	64	170	0.00497512	0.182927	0.0307692	0.163743	36.7683	5.32164
TGME49_236040:1757	0	6	0	6	T	TGME49_236040	1757	24	18	16	29	0.04	0.368421	0.0588235	0.233333	9.21053	3.96667	0	37	5	34	T	TGME49_236040	1757	185	232	235	370	0.00537634	0.16309	0.0254237	0.0943396	30.3348	3.71069
TGME49_236040:1870	0	6	0	5	T	TGME49_236040	1870	16	19	4	30	0.0588235	0.35	0.2	0.193548	5.95	0.967742	2	54	42	47	T	TGME49_236040	1870	313	325	270	365	0.00955414	0.168712	0.158672	0.131148	17.6585	0.826535
TGME49_236040:2260	0	11	1	0	T	TGME49_236040	2260	50	70	60	67	0.0196078	0.169014	0.0327869	0.0147059	8.61972	0.448529	1	35	20	36	T	TGME49_236040	2260	257	294	72	221	0.00775194	0.122034	0.287671	0.166667	15.7424	0.579365
TGME49_236050:850	0	7	2	12	T	TGME49_236050	850	22	17	11	23	0.0434783	0.444444	0.25	0.541667	10.2222	2.16667	1	18	6	0	T	TGME49_236050	850	81	109	57	83	0.0243902	0.172727	0.12069	0.0119048	7.08182	0.0986395
TGME49_236210:1597	0	5	0	0	T	TGME49_236210	1597	15	8	1	10	0.0625	0.666667	0.5	0.0909091	10.6667	0.181818	0	6	0	0	T	TGME49_236210	1597	54	23	3	18	0.0181818	0.291667	0.25	0.0526316	16.0417	0.210526
TGME49_236580:1017	0	8	5	1	T	TGME49_236580	1017	12	25	23	12	0.0769231	0.346154	0.25	0.153846	4.5	0.615385	0	19	0	0	T	TGME49_236580	1017	120	67	74	4	0.00826446	0.294118	0.0133333	0.2	35.5882	15
TGME49_236580:914	0	5	0	1	T	TGME49_236580	914	39	32	11	25	0.025	0.181818	0.0833333	0.0769231	7.27273	0.923077	0	33	0	2	T	TGME49_236580	914	49	91	67	41	0.02	0.369565	0.0147059	0.0714286	18.4783	4.85714
TGME49_236630:1299	0	6	0	4	T	TGME49_236630	1299	37	17	2	4	0.0263158	0.388889	0.333333	1	14.7778	3	0	7	0	0	T	TGME49_236630	1299	90	57	8	56	0.010989	0.137931	0.111111	0.0175439	12.5517	0.157895
TGME49_236630:1372	0	8	0	0	T	TGME49_236630	1372	23	38	7	18	0.0416667	0.230769	0.125	0.0526316	5.53846	0.421053	1	20	0	28	T	TGME49_236630	1372	187	108	57	39	0.0106383	0.192661	0.0172414	0.725	18.1101	42.05
TGME49_236630:2050	0	5	0	0	T	TGME49_236630	2050	50	40	2	33	0.0196078	0.146342	0.333333	0.0294118	7.46342	0.0882353	1	5	16	0	T	TGME49_236630	2050	90	35	26	10	0.021978	0.166667	0.62963	0.0909091	7.58333	0.144385
TGME49_236630:674	0	9	0	0	T	TGME49_236630	674	26	34	18	10	0.037037	0.285714	0.0526316	0.0909091	7.71429	1.72727	0	10	37	5	T	TGME49_236630	674	46	43	71	60	0.0212766	0.25	0.527778	0.0983607	11.75	0.186368
TGME49_236650:1716	0	18	0	16	T	TGME49_236650	1716	41	43	27	42	0.0238095	0.431818	0.0357143	0.395349	18.1364	11.0698	0	7	1	0	T	TGME49_236650	1716	100	35	25	70	0.00990099	0.222222	0.0769231	0.0140845	22.4444	0.183099
TGME49_236650:1863	0	9	0	0	T	TGME49_236650	1863	60	64	25	30	0.0163934	0.153846	0.0384615	0.0322581	9.38462	0.83871	0	11	0	0	T	TGME49_236650	1863	33	34	18	23	0.0294118	0.342857	0.0526316	0.0416667	11.6571	0.791667
TGME49_236650:2414	0	20	5	0	T	TGME49_236650	2414	38	56	11	36	0.025641	0.368421	0.5	0.027027	14.3684	0.054054	0	7	0	9	T	TGME49_236650	2414	79	57	13	30	0.0125	0.137931	0.0714286	0.322581	11.0345	4.51613
TGME49_236650:2557	0	5	0	3	T	TGME49_236650	2557	91	36	65	40	0.0108696	0.162162	0.0151515	0.097561	14.9189	6.43902	0	8	3	27	T	TGME49_236650	2557	47	28	8	77	0.0208333	0.310345	0.444444	0.358974	14.8966	0.807692
TGME49_236650:2702	0	8	0	5	T	TGME49_236650	2702	43	43	2	12	0.0227273	0.204545	0.333333	0.461539	9	1.38461	0	6	0	0	T	TGME49_236650	2702	84	41	21	31	0.0117647	0.166667	0.0454545	0.03125	14.1667	0.6875
TGME49_236650:3278	0	20	2	0	T	TGME49_236650	3278	12	58	6	35	0.0769231	0.355932	0.428571	0.0277778	4.62712	0.0648148	0	6	0	0	T	TGME49_236650	3278	40	34	28	48	0.0243902	0.2	0.0344828	0.0204082	8.2	0.591837
TGME49_236650:3449	0	6	3	10	T	TGME49_236650	3449	46	29	40	17	0.0212766	0.233333	0.097561	0.611111	10.9667	6.26389	0	10	0	40	T	TGME49_236650	3449	87	56	38	81	0.0113636	0.192982	0.025641	0.5	16.9825	19.5
TGME49_236650:3623	0	8	0	11	T	TGME49_236650	3623	14	30	20	29	0.0666667	0.290323	0.0476191	0.4	4.35484	8.4	1	19	0	13	T	TGME49_236650	3623	66	63	31	60	0.0298507	0.3125	0.03125	0.229508	10.4688	7.34426
TGME49_236650:3655	0	8	0	10	T	TGME49_236650	3655	39	24	10	35	0.025	0.36	0.0909091	0.305556	14.4	3.36111	0	8	0	8	T	TGME49_236650	3655	29	56	23	26	0.0333333	0.157895	0.0416667	0.333333	4.73684	8
TGME49_236650:4046	0	9	0	4	T	TGME49_236650	4046	53	48	15	32	0.0185185	0.204082	0.0625	0.151515	11.0204	2.42424	3	9	0	1	T	TGME49_236650	4046	88	51	40	8	0.0449438	0.192308	0.0243902	0.222222	4.27885	9.11111
TGME49_236650:4053	0	9	0	0	T	TGME49_236650	4053	34	60	15	52	0.0285714	0.163934	0.0625	0.0188679	5.73771	0.301887	1	15	0	0	T	TGME49_236650	4053	98	122	39	25	0.020202	0.130081	0.025	0.0384615	6.43902	1.53846
TGME49_236870:273	0	9	4	12	T	TGME49_236870	273	134	51	33	54	0.00740741	0.192308	0.147059	0.236364	25.9615	1.60727	22	50	0	22	T	TGME49_236870	273	638	303	49	170	0.0359937	0.167763	0.02	0.134503	4.6609	6.72515
TGME49_236870:282	0	6	0	1	T	TGME49_236870	282	73	42	19	40	0.0135135	0.162791	0.05	0.0487805	12.0465	0.97561	0	47	0	20	T	TGME49_236870	282	177	213	89	167	0.00561798	0.224299	0.0111111	0.125	39.9252	11.25
TGME49_236870:397	0	8	3	1	T	TGME49_236870	397	49	41	23	51	0.02	0.214286	0.166667	0.0384615	10.7143	0.230769	0	47	41	0	T	TGME49_236870	397	347	177	72	69	0.00287356	0.269663	0.575342	0.0142857	93.8427	0.0248299
TGME49_236890:1262	0	12	0	0	T	TGME49_236890	1262	35	34	13	24	0.0277778	0.371429	0.0714286	0.04	13.3714	0.56	0	12	6	38	T	TGME49_236890	1262	109	106	7	77	0.00909091	0.121495	0.875	0.5	13.3645	0.571429
TGME49_236890:776	0	6	2	13	T	TGME49_236890	776	51	31	8	46	0.0192308	0.21875	0.333333	0.297872	11.375	0.893617	0	17	0	0	T	TGME49_236890	776	58	131	44	48	0.0169492	0.136364	0.0222222	0.0204082	8.04545	0.918367
TGME49_236890:971	0	5	0	0	T	TGME49_236890	971	38	35	11	41	0.025641	0.166667	0.0833333	0.0238095	6.5	0.285714	0	16	0	0	T	TGME49_236890	971	78	65	15	45	0.0126582	0.257576	0.0625	0.0217391	20.3485	0.347826
TGME49_236950:183	0	16	0	17	T	TGME49_236950	183	30	34	18	34	0.0322581	0.485714	0.0526316	0.514286	15.0571	9.77143	15	63	0	0	T	TGME49_236950	183	148	101	63	65	0.107383	0.627451	0.015625	0.0151515	5.84314	0.969697
TGME49_237015:14	0	12	3	6	T	TGME49_237015	14	13	27	8	9	0.0714286	0.464286	0.444444	0.7	6.5	1.575	0	20	0	5	T	TGME49_237015	14	113	104	55	127	0.00877193	0.2	0.0178571	0.046875	22.8	2.625
TGME49_237015:438	0	7	0	0	T	TGME49_237015	438	58	56	7	21	0.0169491	0.140351	0.125	0.0454546	8.2807	0.363636	0	14	0	11	T	TGME49_237015	438	171	78	13	48	0.00581395	0.189873	0.0714286	0.244898	32.6582	3.42857
TGME49_237015:443	0	8	0	9	T	TGME49_237015	443	58	67	4	44	0.0169491	0.132353	0.2	0.222222	7.80882	1.11111	0	14	0	0	T	TGME49_237015	443	155	86	13	25	0.00641026	0.172414	0.0714286	0.0384615	26.8966	0.538462
TGME49_237130:1311	0	7	2	9	T	TGME49_237130	1311	27	40	6	37	0.0357143	0.195122	0.428571	0.263158	5.46342	0.614035	0	9	0	0	T	TGME49_237130	1311	11	25	13	12	0.0833333	0.384615	0.0714286	0.0769231	4.61538	1.07692
TGME49_237130:1471	0	9	0	0	T	TGME49_237130	1471	55	30	14	19	0.0178571	0.322581	0.0666667	0.05	18.0645	0.75	0	7	0	0	T	TGME49_237130	1471	33	20	4	9	0.0294118	0.380952	0.2	0.1	12.9524	0.5
TGME49_237150:1835	0	9	5	0	T	TGME49_237150	1835	14	16	15	25	0.0666667	0.588235	0.375	0.0384615	8.82353	0.102564	0	7	36	0	T	TGME49_237150	1835	48	43	60	49	0.0204082	0.181818	0.606557	0.02	8.90909	0.032973
TGME49_237150:2327	0	8	0	34	T	TGME49_237150	2327	33	32	7	52	0.0294118	0.272727	0.125	0.660377	9.27273	5.28302	1	27	0	35	T	TGME49_237150	2327	120	103	36	39	0.0165289	0.269231	0.027027	0.9	16.2885	33.3
TGME49_237230:1647	0	14	0	13	T	TGME49_237230	1647	31	49	27	51	0.03125	0.3	0.0357143	0.269231	9.6	7.53846	11	40	78	0	T	TGME49_237230	1647	283	231	171	229	0.0422535	0.176724	0.459302	0.00434783	4.18247	0.00946615
TGME49_237230:2050	0	19	0	3	T	TGME49_237230	2050	135	84	38	77	0.00735294	0.235294	0.025641	0.0512821	32	2	0	16	0	0	T	TGME49_237230	2050	91	134	30	102	0.0108696	0.125926	0.0322581	0.00970874	11.5852	0.300971
TGME49_237230:2067	0	9	0	0	T	TGME49_237230	2067	27	69	19	67	0.0357143	0.142857	0.05	0.0147059	4	0.294118	0	10	0	0	T	TGME49_237230	2067	37	68	1	87	0.0263158	0.15942	0.5	0.0113636	6.05797	0.0227273
TGME49_237230:2190	0	20	1	3	T	TGME49_237230	2190	91	101	49	81	0.0108696	0.205882	0.04	0.0487805	18.9412	1.21951	0	31	8	0	T	TGME49_237230	2190	331	259	226	97	0.00301205	0.123077	0.0396476	0.0102041	40.8615	0.25737
TGME49_237230:2895	0	10	0	2	T	TGME49_237230	2895	22	23	14	31	0.0434783	0.458333	0.0666667	0.09375	10.5417	1.40625	3	48	0	39	T	TGME49_237230	2895	149	209	82	105	0.0266667	0.233333	0.0120482	0.377358	8.75	31.3208
TGME49_237560:1815	0	7	0	0	T	TGME49_237560	1815	22	51	15	24	0.0434783	0.153846	0.0625	0.04	3.53846	0.64	0	11	0	0	T	TGME49_237560	1815	109	70	16	108	0.00909091	0.169014	0.0588235	0.00917431	18.5915	0.155963
TGME49_237560:2057	0	8	0	1	T	TGME49_237560	2057	32	27	5	26	0.030303	0.321429	0.166667	0.0740741	10.6071	0.444444	0	12	0	0	T	TGME49_237560	2057	80	56	77	9	0.0123457	0.22807	0.0128205	0.1	18.4737	7.8
TGME49_237560:361	0	6	5	18	T	TGME49_237560	361	17	18	15	35	0.0555556	0.368421	0.375	0.527778	6.63158	1.40741	0	12	0	0	T	TGME49_237560	361	48	48	31	34	0.0204082	0.265306	0.03125	0.0285714	13	0.914286
TGME49_237560:567	0	6	0	1	T	TGME49_237560	567	17	30	5	6	0.0555556	0.225806	0.166667	0.285714	4.06452	1.71429	0	6	0	0	T	TGME49_237560	567	82	53	8	21	0.0120482	0.12963	0.111111	0.0454545	10.7593	0.409091
TGME49_237880:1764	0	5	0	0	T	TGME49_237880	1764	31	13	2	9	0.03125	0.428571	0.333333	0.1	13.7143	0.3	0	13	0	0	T	TGME49_237880	1764	75	107	82	51	0.0131579	0.12963	0.0120482	0.0192308	9.85185	1.59615
TGME49_238010:1416	0	10	2	22	T	TGME49_238010	1416	25	67	27	78	0.0384615	0.161765	0.107143	0.291139	4.20588	2.7173	23	119	22	58	T	TGME49_238010	1416	368	464	188	317	0.0650407	0.258065	0.121693	0.185535	3.96774	1.52461
TGME49_238250:1107	0	14	0	20	T	TGME49_238250	1107	138	86	37	74	0.00719425	0.172414	0.0263158	0.28	23.9655	10.64	21	95	34	68	T	TGME49_238250	1107	269	289	69	159	0.0814815	0.331034	0.5	0.43125	4.0627	0.8625
TGME49_239100:1086	0	26	0	17	T	TGME49_239100	1086	31	87	24	64	0.03125	0.306818	0.04	0.276923	9.81818	6.92308	5	59	0	14	T	TGME49_239100	1086	436	308	186	61	0.01373	0.194175	0.00534759	0.241935	14.1424	45.2419
TGME49_239100:1099	0	19	0	1	T	TGME49_239100	1099	68	96	9	47	0.0144928	0.206186	0.1	0.0416667	14.2268	0.416667	11	39	0	0	T	TGME49_239100	1099	401	324	133	55	0.0298507	0.123077	0.00746269	0.0178571	4.12308	2.39286
TGME49_239100:1114	0	51	1	52	T	TGME49_239100	1114	144	140	10	94	0.00689655	0.368794	0.181818	0.557895	53.4752	3.06842	28	105	0	76	T	TGME49_239100	1114	477	341	93	185	0.0606695	0.309942	0.0106383	0.413978	5.10869	38.914
TGME49_239100:588	0	15	0	1	T	TGME49_239100	588	111	109	23	96	0.00892857	0.145454	0.0416667	0.0206186	16.2909	0.494845	5	123	0	53	T	TGME49_239100	588	341	489	136	252	0.0175439	0.253061	0.00729927	0.213439	14.4245	29.2411
TGME49_239330:159	0	13	7	2	T	TGME49_239330	159	243	100	44	62	0.00409836	0.138614	0.177778	0.0476191	33.8218	0.267857	2	25	1	23	T	TGME49_239330	159	176	214	69	76	0.0169492	0.12093	0.0285714	0.311688	7.13488	10.9091
TGME49_239330:624	0	24	0	5	T	TGME49_239330	624	50	114	62	94	0.0196078	0.217391	0.015873	0.0631579	11.087	3.97895	5	68	31	38	T	TGME49_239330	624	484	452	233	274	0.0123711	0.152318	0.136752	0.141818	12.3124	1.03705
TGME49_239330:710	0	25	0	11	T	TGME49_239330	710	81	137	81	90	0.0121951	0.188406	0.0121951	0.131868	15.4493	10.8132	35	158	9	82	T	TGME49_239330	710	1306	820	184	399	0.027544	0.193666	0.0540541	0.2075	7.03116	3.83875
TGME49_239420:8386	0	6	0	15	T	TGME49_239420	8386	9	11	2	19	0.1	0.583333	0.333333	0.8	5.83333	2.4	0	9	0	0	T	TGME49_239420	8386	28	31	1	3	0.0344828	0.3125	0.5	0.25	9.0625	0.5
TGME49_239420:9622	0	5	0	1	T	TGME49_239420	9622	24	10	14	10	0.04	0.545454	0.0666667	0.181818	13.6364	2.72727	3	14	0	0	T	TGME49_239420	9622	192	86	24	70	0.0207254	0.172414	0.04	0.0140845	8.31897	0.352113
TGME49_239740:1089	0	17	0	10	T	TGME49_239740	1089	39	118	39	104	0.025	0.15126	0.025	0.104762	6.05042	4.19048	0	32	0	0	T	TGME49_239740	1089	306	168	45	93	0.00325733	0.195266	0.0217391	0.0106383	59.9467	0.489362
TGME49_239740:1260	0	30	0	12	T	TGME49_239740	1260	72	116	49	91	0.0136986	0.264957	0.02	0.141304	19.3419	7.06522	18	31	0	0	T	TGME49_239740	1260	441	140	112	84	0.0429864	0.22695	0.00884956	0.0117647	5.27958	1.32941
TGME49_239740:2206	0	17	1	21	T	TGME49_239740	2206	95	124	57	146	0.0104167	0.144	0.0344828	0.14966	13.824	4.34014	0	35	0	49	T	TGME49_239740	2206	126	234	23	130	0.00787402	0.153191	0.0416667	0.381679	19.4553	9.16031
TGME49_239740:2488	0	17	1	15	T	TGME49_239740	2488	23	29	11	24	0.0416667	0.6	0.166667	0.64	14.4	3.84	4	35	20	46	T	TGME49_239740	2488	84	64	61	51	0.0588235	0.553846	0.33871	0.903846	9.41538	2.6685
TGME49_239740:2490	0	5	0	18	T	TGME49_239740	2490	23	35	13	56	0.0416667	0.166667	0.0714286	0.333333	4	4.66667	0	8	0	0	T	TGME49_239740	2490	82	65	61	46	0.0120482	0.136364	0.016129	0.0212766	11.3182	1.31915
TGME49_239760:77	0	32	12	11	T	TGME49_239760	77	180	110	54	98	0.00552486	0.297297	0.236364	0.121212	53.8108	0.512821	7	68	0	27	T	TGME49_239760	77	267	331	12	146	0.0298507	0.207831	0.0769231	0.190476	6.96235	2.47619
TGME49_239760:83	0	15	0	3	T	TGME49_239760	83	174	110	57	96	0.00571429	0.144144	0.0172414	0.0412371	25.2252	2.39175	6	58	0	12	T	TGME49_239760	83	202	288	21	89	0.0344828	0.204152	0.0454545	0.144444	5.92042	3.17778
TGME49_239820:1148	0	7	0	11	T	TGME49_239820	1148	75	65	33	62	0.0131579	0.121212	0.0294118	0.190476	9.21212	6.47619	0	12	0	0	T	TGME49_239820	1148	31	54	26	27	0.03125	0.236364	0.037037	0.0357143	7.56364	0.964286
TGME49_239820:2273	0	6	0	0	T	TGME49_239820	2273	41	48	42	34	0.0238095	0.142857	0.0232558	0.0285714	6	1.22857	0	6	0	0	T	TGME49_239820	2273	65	30	9	1	0.0151515	0.225806	0.1	0.5	14.9032	5
TGME49_239820:2921	0	9	0	3	T	TGME49_239820	2921	41	61	18	26	0.0238095	0.16129	0.0526316	0.148148	6.77419	2.81481	0	15	0	0	T	TGME49_239820	2921	67	45	32	38	0.0147059	0.347826	0.030303	0.025641	23.6522	0.846154
TGME49_239820:3429	0	8	0	2	T	TGME49_239820	3429	31	45	17	38	0.03125	0.195652	0.0555556	0.0769231	6.26087	1.38461	0	5	0	9	T	TGME49_239820	3429	35	35	32	9	0.0277778	0.166667	0.030303	1	6	33
TGME49_239890:1154	0	6	0	0	T	TGME49_239890	1154	78	54	44	38	0.0126582	0.127273	0.0222222	0.025641	10.0546	1.15385	0	11	0	0	T	TGME49_239890	1154	92	79	13	54	0.0107527	0.15	0.0714286	0.0181818	13.95	0.254545
TGME49_240060:1184	0	8	0	4	T	TGME49_240060	1184	65	65	9	33	0.0151515	0.136364	0.1	0.147059	9	1.47059	11	56	57	20	T	TGME49_240060	1184	244	189	96	96	0.0489796	0.3	0.597938	0.216495	6.125	0.362069
TGME49_240060:1957	0	19	6	9	T	TGME49_240060	1957	44	40	8	34	0.0222222	0.487805	0.777778	0.285714	21.9512	0.367347	0	50	0	0	T	TGME49_240060	1957	227	221	83	35	0.00438597	0.22973	0.0119048	0.0277778	52.3784	2.33333
TGME49_240060:2256	0	49	19	52	T	TGME49_240060	2256	62	87	45	77	0.015873	0.568182	0.434783	0.679487	35.7955	1.56282	5	163	9	59	T	TGME49_240060	2256	66	248	48	117	0.0895522	0.658635	0.204082	0.508475	7.35475	2.49153
TGME49_240060:2817	0	20	0	2	T	TGME49_240060	2817	22	53	16	30	0.0434783	0.388889	0.0588235	0.0967742	8.94444	1.64516	0	43	0	40	T	TGME49_240060	2817	225	102	61	194	0.00442478	0.427184	0.016129	0.210256	96.5437	13.0359
TGME49_240060:3005	0	8	1	5	T	TGME49_240060	3005	30	59	52	65	0.0322581	0.15	0.0377359	0.0909091	4.65	2.40909	0	9	0	0	T	TGME49_240060	3005	34	78	51	62	0.0285714	0.126582	0.0192308	0.015873	4.43038	0.825397
TGME49_240060:64	0	5	1	0	T	TGME49_240060	64	10	17	1	17	0.0909091	0.333333	1	0.0555556	3.66667	0.0555556	0	12	0	0	T	TGME49_240060	64	32	56	51	54	0.030303	0.22807	0.0192308	0.0181818	7.52632	0.945455
TGME49_240090:2284	0	6	0	0	T	TGME49_240090	2284	45	24	1	24	0.0217391	0.28	0.5	0.04	12.88	0.08	0	8	0	40	T	TGME49_240090	2284	50	41	4	80	0.0196078	0.214286	0.2	0.506173	10.9286	2.53086
TGME49_240090:577	0	8	0	4	T	TGME49_240090	577	49	54	8	31	0.02	0.163636	0.111111	0.15625	8.18182	1.40625	0	49	22	61	T	TGME49_240090	577	332	260	196	233	0.003003	0.191571	0.116751	0.264957	63.7931	2.26942
TGME49_240250:2101	0	5	5	0	T	TGME49_240250	2101	16	11	5	2	0.0588235	0.5	1	0.333333	8.5	0.333333	0	5	0	0	T	TGME49_240250	2101	34	21	26	8	0.0285714	0.272727	0.037037	0.111111	9.54545	3
TGME49_240640:2283	0	5	0	0	T	TGME49_240640	2283	38	19	8	10	0.025641	0.3	0.111111	0.0909091	11.7	0.818182	0	8	23	0	T	TGME49_240640	2283	87	44	23	1	0.0113636	0.2	1	0.5	17.6	0.5
TGME49_241240:1495	0	15	4	15	T	TGME49_241240	1495	26	54	25	50	0.037037	0.290909	0.192308	0.313725	7.85454	1.63137	15	36	0	59	T	TGME49_241240	1495	102	66	46	102	0.15534	0.552239	0.0212766	0.582524	3.55504	27.3786
TGME49_241240:2174	1	13	4	0	T	TGME49_241240	2174	64	73	30	61	0.0307692	0.189189	0.16129	0.016129	6.14865	0.1	0	11	0	70	T	TGME49_241240	2174	57	64	19	168	0.0172414	0.184615	0.05	0.420118	10.7077	8.40237
TGME49_241240:2239	0	10	1	4	T	TGME49_241240	2239	37	57	36	52	0.0263158	0.189655	0.054054	0.0943396	7.2069	1.74528	0	17	0	0	T	TGME49_241240	2239	74	83	99	61	0.0133333	0.214286	0.01	0.016129	16.0714	1.6129
TGME49_241240:2439	0	5	0	0	T	TGME49_241240	2439	38	37	14	44	0.025641	0.157895	0.0666667	0.0222222	6.15789	0.333333	5	26	3	9	T	TGME49_241240	2439	377	175	150	240	0.015873	0.153409	0.0264901	0.0414938	9.66477	1.56639
TGME49_241240:4187	0	12	0	4	T	TGME49_241240	4187	57	52	17	12	0.0172414	0.245283	0.0555556	0.384615	14.2264	6.92308	0	16	0	0	T	TGME49_241240	4187	56	62	45	21	0.0175439	0.269841	0.0217391	0.0454545	15.381	2.09091
TGME49_241240:4322	0	8	1	20	T	TGME49_241240	4322	64	37	10	70	0.0153846	0.236842	0.181818	0.295775	15.3947	1.62676	0	7	0	0	T	TGME49_241240	4322	30	27	1	39	0.0322581	0.285714	0.5	0.025	8.85714	0.05
TGME49_241240:5112	0	10	3	8	T	TGME49_241240	5112	26	37	5	38	0.037037	0.289474	0.666667	0.230769	7.81579	0.346154	0	9	0	17	T	TGME49_241240	5112	31	40	12	54	0.03125	0.243902	0.0769231	0.327273	7.80488	4.25455
TGME49_241820:3390	0	6	0	1	T	TGME49_241820	3390	37	39	28	60	0.0263158	0.175	0.0344828	0.0327869	6.65	0.95082	1	6	0	0	T	TGME49_241820	3390	106	15	89	24	0.0186916	0.4375	0.0111111	0.04	23.4062	3.6
TGME49_242070:5473	0	11	0	0	T	TGME49_242070	5473	43	23	13	8	0.0227273	0.5	0.0714286	0.111111	22	1.55556	10	24	6	11	T	TGME49_242070	5473	141	55	29	27	0.0774648	0.446429	0.233333	0.428571	5.76299	1.83673
TGME49_242070:5545	1	9	0	7	T	TGME49_242070	5545	93	32	4	29	0.0212766	0.30303	0.2	0.266667	14.2424	1.33333	0	9	0	0	T	TGME49_242070	5545	27	28	3	29	0.0357143	0.344828	0.25	0.0333333	9.65517	0.133333
TGME49_242070:5962	0	6	0	0	T	TGME49_242070	5962	54	32	17	22	0.0181818	0.212121	0.0555556	0.0434783	11.6667	0.782609	0	9	0	0	T	TGME49_242070	5962	25	39	38	35	0.0384615	0.25	0.025641	0.0277778	6.5	1.08333
TGME49_242070:6758	0	7	0	1	T	TGME49_242070	6758	48	31	16	19	0.0204082	0.25	0.0588235	0.1	12.25	1.7	0	11	0	0	T	TGME49_242070	6758	127	54	49	14	0.0078125	0.218182	0.02	0.0666667	27.9273	3.33333
TGME49_242090:2043	0	5	0	0	T	TGME49_242090	2043	61	33	12	36	0.016129	0.176471	0.0769231	0.027027	10.9412	0.351351	0	6	0	0	T	TGME49_242090	2043	11	18	12	34	0.0833333	0.368421	0.0769231	0.0285714	4.42105	0.371429
TGME49_242290:966	0	5	0	9	T	TGME49_242290	966	33	9	1	15	0.0294118	0.6	0.5	0.625	20.4	1.25	0	5	0	0	T	TGME49_242290	966	23	19	2	5	0.0416667	0.3	0.333333	0.166667	7.2	0.5
TGME49_242330:558	0	11	0	15	T	TGME49_242330	558	71	48	34	55	0.0138889	0.244898	0.0285714	0.285714	17.6327	10	26	103	23	59	T	TGME49_242330	558	727	744	326	519	0.0370879	0.139597	0.0733945	0.115385	3.76396	1.57212
TGME49_242330:762	4	31	0	78	T	TGME49_242330	762	226	110	64	172	0.0220264	0.288288	0.0153846	0.456647	13.0883	29.6821	42	136	15	97	T	TGME49_242330	762	679	449	159	282	0.0632353	0.304444	0.1	0.34629	4.81447	3.4629
TGME49_242330:779	0	74	4	23	T	TGME49_242330	779	125	174	44	162	0.00793651	0.428571	0.111111	0.147239	54	1.32515	34	273	0	176	T	TGME49_242330	779	718	764	147	418	0.0486787	0.35817	0.00675676	0.422434	7.35783	62.5203
TGME49_242340:699	0	8	1	3	T	TGME49_242340	699	106	56	20	95	0.00934579	0.157895	0.0952381	0.0416667	16.8947	0.4375	12	23	0	15	T	TGME49_242340	699	280	139	82	173	0.0462633	0.171429	0.0120482	0.091954	3.70549	7.63218
TGME49_242340:789	0	21	11	37	T	TGME49_242340	789	16	76	51	154	0.0588235	0.285714	0.230769	0.245161	4.85714	1.06237	26	236	0	76	T	TGME49_242340	789	293	452	70	204	0.0918367	0.523179	0.0140845	0.37561	5.69684	26.6683
TGME49_243460:1989	0	28	1	19	T	TGME49_243460	1989	40	41	12	33	0.0243902	0.690476	0.153846	0.588235	28.3095	3.82353	0	31	0	40	T	TGME49_243460	1989	131	115	9	118	0.00757576	0.275862	0.1	0.344538	36.4138	3.44538
TGME49_243460:2179	0	21	8	4	T	TGME49_243460	2179	37	50	8	24	0.0263158	0.431372	1	0.2	16.3922	0.2	0	8	0	47	T	TGME49_243460	2179	42	18	2	115	0.0232558	0.473684	0.333333	0.413793	20.3684	1.24138
TGME49_243460:2438	0	9	1	1	T	TGME49_243460	2438	27	30	14	10	0.0357143	0.322581	0.133333	0.181818	9.03226	1.36364	0	12	0	18	T	TGME49_243460	2438	46	83	25	41	0.0212766	0.154762	0.0384615	0.452381	7.27381	11.7619
TGME49_243460:3955	0	6	0	3	T	TGME49_243460	3955	15	18	10	11	0.0625	0.368421	0.0909091	0.333333	5.89474	3.66667	0	8	0	0	T	TGME49_243460	3955	46	44	41	68	0.0212766	0.2	0.0238095	0.0144928	9.4	0.608696
TGME49_243460:4278	0	6	0	11	T	TGME49_243460	4278	50	35	28	32	0.0196078	0.194444	0.0344828	0.363636	9.91667	10.5455	0	11	0	0	T	TGME49_243460	4278	27	70	16	38	0.0357143	0.169014	0.0588235	0.025641	4.73239	0.435897
TGME49_243460:4438	0	5	1	6	T	TGME49_243460	4438	12	12	9	29	0.0769231	0.461539	0.2	0.233333	6	1.16667	0	9	0	4	T	TGME49_243460	4438	19	56	28	16	0.05	0.175439	0.0344828	0.294118	3.50877	8.52941
TGME49_243460:5140	0	6	4	9	T	TGME49_243460	5140	28	33	22	44	0.0344828	0.205882	0.217391	0.222222	5.97059	1.02222	0	7	0	0	T	TGME49_243460	5140	57	52	41	60	0.0172414	0.150943	0.0238095	0.0163934	8.75472	0.688525
TGME49_243545:13	0	8	0	6	T	TGME49_243545	13	8	22	15	44	0.111111	0.391304	0.0625	0.155556	3.52174	2.48889	0	25	0	10	T	TGME49_243545	13	305	203	208	139	0.00326797	0.127451	0.00478469	0.0785714	39	16.4214
TGME49_243545:153	0	6	0	2	T	TGME49_243545	153	42	30	18	9	0.0232558	0.225806	0.0526316	0.3	9.70968	5.7	0	28	0	0	T	TGME49_243545	153	139	146	18	23	0.00714286	0.197279	0.0526316	0.0416667	27.619	0.791667
TGME49_243545:162	0	5	0	1	T	TGME49_243545	162	47	38	15	27	0.0208333	0.153846	0.0625	0.0714286	7.38462	1.14286	0	27	1	32	T	TGME49_243545	162	137	131	17	55	0.00724638	0.212121	0.111111	0.589286	29.2727	5.30357
TGME49_243545:29	0	10	3	6	T	TGME49_243545	29	29	43	21	60	0.0333333	0.25	0.181818	0.114754	7.5	0.631147	0	58	0	26	T	TGME49_243545	29	381	394	153	246	0.0026178	0.149367	0.00649351	0.109312	57.0582	16.834
TGME49_243570:1005	0	7	5	2	T	TGME49_243570	1005	81	54	24	35	0.0121951	0.145454	0.24	0.0833333	11.9273	0.347222	6	50	0	0	T	TGME49_243570	1005	329	407	71	162	0.0212121	0.125	0.0138889	0.00613497	5.89286	0.441718
TGME49_243570:1057	0	46	0	43	T	TGME49_243570	1057	39	84	8	56	0.025	0.552941	0.111111	0.77193	22.1177	6.94737	42	262	32	96	T	TGME49_243570	1057	579	601	165	179	0.0741379	0.436877	0.198795	0.538889	5.89276	2.71077
TGME49_243570:532	0	16	6	7	T	TGME49_243570	532	168	82	27	43	0.00591716	0.204819	0.25	0.181818	34.6145	0.727273	26	72	0	0	T	TGME49_243570	532	479	304	40	143	0.05625	0.239344	0.0243902	0.00694444	4.25501	0.284722
TGME49_243570:539	0	31	0	32	T	TGME49_243570	539	145	125	25	76	0.00684931	0.253968	0.0384615	0.428571	37.0794	11.1429	29	208	0	49	T	TGME49_243570	539	888	612	76	262	0.0337458	0.340946	0.012987	0.190114	10.1034	14.6388
TGME49_243690:1741	0	8	0	2	T	TGME49_243690	1741	24	21	11	7	0.04	0.409091	0.0833333	0.375	10.2273	4.5	0	11	0	0	T	TGME49_243690	1741	53	59	82	42	0.0185185	0.2	0.0120482	0.0232558	10.8	1.93023
TGME49_243690:1808	0	8	0	0	T	TGME49_243690	1808	28	25	10	22	0.0344828	0.346154	0.0909091	0.0434783	10.0385	0.478261	0	6	0	0	T	TGME49_243690	1808	82	55	37	87	0.0120482	0.125	0.0263158	0.0113636	10.375	0.431818
TGME49_243690:2212	0	6	0	5	T	TGME49_243690	2212	14	16	4	25	0.0666667	0.411765	0.2	0.230769	6.17647	1.15385	0	14	7	0	T	TGME49_243690	2212	67	88	16	42	0.0147059	0.168539	0.470588	0.0232558	11.4607	0.0494186
TGME49_243690:979	0	6	0	0	T	TGME49_243690	979	17	16	12	25	0.0555556	0.411765	0.0769231	0.0384615	7.41176	0.5	0	27	17	19	T	TGME49_243690	979	24	95	17	99	0.04	0.291667	1	0.2	7.29167	0.2
TGME49_243730:1023	0	18	0	0	T	TGME49_243730	1023	94	137	68	105	0.0105263	0.137681	0.0144928	0.00943396	13.0797	0.650943	16	52	0	65	T	TGME49_243730	1023	497	338	195	265	0.0341365	0.156342	0.00510204	0.24812	4.57991	48.6316
TGME49_243730:1046	0	67	6	80	T	TGME49_243730	1046	61	154	21	144	0.016129	0.43871	0.318182	0.558621	27.2	1.75567	13	161	0	118	T	TGME49_243730	1046	334	517	230	538	0.041791	0.312741	0.004329	0.220779	7.48345	51
TGME49_243730:1072	0	8	0	5	T	TGME49_243730	1072	53	40	25	38	0.0185185	0.219512	0.0384615	0.153846	11.8537	4	0	20	0	18	T	TGME49_243730	1072	155	138	71	80	0.00641026	0.151079	0.0138889	0.234568	23.5683	16.8889
TGME49_243730:1116	0	18	12	29	T	TGME49_243730	1116	17	43	14	40	0.0555556	0.431818	0.866667	0.731707	7.77273	0.844278	0	141	0	49	T	TGME49_243730	1116	382	401	51	175	0.00261097	0.353234	0.0192308	0.284091	135.289	14.7727
TGME49_243730:1120	0	38	0	10	T	TGME49_243730	1120	17	82	14	79	0.0555556	0.46988	0.0666667	0.1375	8.45783	2.0625	9	238	1	219	T	TGME49_243730	1120	362	675	75	426	0.0275482	0.35355	0.0263158	0.515222	12.8339	19.5785
TGME49_243730:1624	0	10	0	0	T	TGME49_243730	1624	37	46	13	25	0.0263158	0.234043	0.0714286	0.0384615	8.89362	0.538462	3	30	0	0	T	TGME49_243730	1624	89	99	39	99	0.0444444	0.31	0.025	0.01	6.975	0.4
TGME49_243730:1765	2	15	8	19	T	TGME49_243730	1765	91	99	59	102	0.0326087	0.16	0.15	0.194175	4.90667	1.2945	2	43	3	13	T	TGME49_243730	1765	168	223	85	102	0.0177515	0.196429	0.0465116	0.135922	11.0655	2.92233
TGME49_243730:1867	0	36	1	22	T	TGME49_243730	1867	67	97	54	95	0.0147059	0.377551	0.0363636	0.239583	25.6735	6.58854	20	86	10	41	T	TGME49_243730	1867	436	318	84	276	0.0480549	0.272727	0.129412	0.151625	5.67532	1.17164
TGME49_243730:835	4	42	7	15	T	TGME49_243730	835	43	83	52	70	0.113636	0.511905	0.150943	0.225352	4.50476	1.49296	20	33	18	29	T	TGME49_243730	835	307	125	108	109	0.0681818	0.269841	0.174312	0.272727	3.95767	1.56459
TGME49_243730:943	0	8	6	17	T	TGME49_243730	943	65	48	22	83	0.0151515	0.183673	0.304348	0.214286	12.1225	0.704082	0	44	0	2	T	TGME49_243730	943	241	334	29	319	0.00413223	0.134328	0.0333333	0.009375	32.5075	0.28125
TGME49_243960:851	0	5	0	12	T	TGME49_243960	851	29	18	9	15	0.0333333	0.31579	0.1	0.8125	9.47368	8.125	0	8	0	0	T	TGME49_243960	851	6	9	23	27	0.142857	0.9	0.0416667	0.0357143	6.3	0.857143
TGME49_244250:402	0	8	11	7	T	TGME49_244250	402	6	11	11	21	0.142857	0.75	1	0.363636	5.25	0.363636	0	5	0	0	T	TGME49_244250	402	14	22	51	5	0.0666667	0.26087	0.0192308	0.166667	3.91304	8.66667
TGME49_244280:326	0	7	4	4	T	TGME49_244280	326	28	30	10	22	0.0344828	0.258064	0.454545	0.217391	7.48387	0.478261	1	35	0	15	T	TGME49_244280	326	306	284	141	104	0.00651466	0.126316	0.00704225	0.152381	19.3895	21.6381
TGME49_244320:1063	0	26	2	21	T	TGME49_244320	1063	121	98	16	64	0.00819672	0.272727	0.176471	0.338462	33.2727	1.91795	0	27	0	4	T	TGME49_244320	1063	101	62	69	10	0.00980392	0.444444	0.0142857	0.454545	45.3333	31.8182
TGME49_244320:788	0	18	4	25	T	TGME49_244320	788	90	92	50	48	0.010989	0.204301	0.0980392	0.530612	18.5914	5.41225	23	108	4	37	T	TGME49_244320	788	263	254	74	208	0.0909091	0.427451	0.0666667	0.181818	4.70196	2.72727
TGME49_244530:695	0	10	0	1	T	TGME49_244530	695	35	30	4	37	0.0277778	0.354839	0.2	0.0526316	12.7742	0.263158	0	9	0	16	T	TGME49_244530	695	59	33	35	17	0.0166667	0.294118	0.0277778	0.944444	17.6471	34
TGME49_244560:2101	0	8	0	2	T	TGME49_244560	2101	34	28	16	45	0.0285714	0.310345	0.0588235	0.0652174	10.8621	1.1087	0	13	0	0	T	TGME49_244560	2101	31	78	30	111	0.03125	0.177215	0.0322581	0.00892857	5.67089	0.276786
TGME49_244560:2746	0	6	0	2	T	TGME49_244560	2746	27	41	22	49	0.0357143	0.166667	0.0434783	0.06	4.66667	1.38	0	33	0	0	T	TGME49_244560	2746	93	191	119	125	0.0106383	0.177083	0.00833333	0.00793651	16.6458	0.952381
TGME49_244560:2777	0	11	0	9	T	TGME49_244560	2777	15	35	17	30	0.0625	0.333333	0.0555556	0.322581	5.33333	5.80645	0	20	0	15	T	TGME49_244560	2777	87	101	33	56	0.0113636	0.205882	0.0294118	0.280702	18.1176	9.54386
TGME49_244560:3220	0	5	0	1	T	TGME49_244560	3220	19	24	11	16	0.05	0.24	0.0833333	0.117647	4.8	1.41176	2	16	12	57	T	TGME49_244560	3220	72	75	50	179	0.0410959	0.223684	0.254902	0.322222	5.44298	1.2641
TGME49_244560:3732	0	6	0	6	T	TGME49_244560	3732	66	32	15	34	0.0149254	0.212121	0.0625	0.2	14.2121	3.2	0	14	0	7	T	TGME49_244560	3732	102	119	47	74	0.00970874	0.125	0.0208333	0.106667	12.875	5.12
TGME49_244560:3843	0	9	0	0	T	TGME49_244560	3843	22	28	8	24	0.0434783	0.344828	0.111111	0.04	7.93103	0.36	0	24	0	61	T	TGME49_244560	3843	152	65	77	65	0.00653595	0.378788	0.0128205	0.939394	57.9545	73.2727
TGME49_244560:943	0	5	0	4	T	TGME49_244560	943	16	15	10	15	0.0588235	0.375	0.0909091	0.3125	6.375	3.4375	0	8	21	18	T	TGME49_244560	943	114	37	62	64	0.00869565	0.236842	0.349206	0.292308	27.2368	0.837063
TGME49_245460:371	0	19	7	13	T	TGME49_245460	371	55	75	50	109	0.0178571	0.263158	0.156863	0.127273	14.7368	0.811364	18	139	17	28	T	TGME49_245460	371	522	625	208	240	0.0363289	0.223642	0.0861244	0.120332	6.15605	1.39719
TGME49_245460:730	21	127	9	130	T	TGME49_245460	730	132	215	60	188	0.165413	0.592593	0.163934	0.693122	3.58249	4.22804	39	357	30	228	T	TGME49_245460	730	566	861	242	455	0.0705467	0.415313	0.127572	0.502193	5.88706	3.93654
TGME49_245460:834	0	34	9	28	T	TGME49_245460	834	148	119	26	87	0.00671141	0.291667	0.37037	0.329545	43.4583	0.889773	2	59	0	37	T	TGME49_245460	834	95	415	44	161	0.03125	0.144231	0.0222222	0.234568	4.61538	10.5556
TGME49_245490:114	0	5	0	0	T	TGME49_245490	114	63	33	22	25	0.015625	0.176471	0.0434783	0.0384615	11.2941	0.884615	0	9	0	0	T	TGME49_245490	114	58	54	11	40	0.0169492	0.181818	0.0833333	0.0243902	10.7273	0.292683
TGME49_245490:2771	0	16	13	8	T	TGME49_245490	2771	26	43	39	58	0.037037	0.386364	0.35	0.152542	10.4318	0.435835	0	9	0	0	T	TGME49_245490	2771	34	40	34	30	0.0285714	0.243902	0.0285714	0.0322581	8.53659	1.12903
TGME49_245490:3209	0	8	0	0	T	TGME49_245490	3209	101	48	13	33	0.00980392	0.183673	0.0714286	0.0294118	18.7347	0.411765	0	6	0	0	T	TGME49_245490	3209	37	33	32	34	0.0263158	0.205882	0.030303	0.0285714	7.82353	0.942857
TGME49_245490:87	0	8	0	0	T	TGME49_245490	87	81	59	34	58	0.0121951	0.15	0.0285714	0.0169491	12.3	0.59322	0	6	0	0	T	TGME49_245490	87	41	46	48	20	0.0238095	0.148936	0.0204082	0.047619	6.25532	2.33333
TGME49_245620:789	0	57	3	51	T	TGME49_245620	789	86	145	23	95	0.0114942	0.39726	0.166667	0.541667	34.5616	3.25	0	66	0	0	T	TGME49_245620	789	324	305	59	65	0.00307692	0.218954	0.0166667	0.0151515	71.1601	0.909091
TGME49_245620:819	1	6	0	5	T	TGME49_245620	819	45	34	10	43	0.0434783	0.2	0.0909091	0.136364	4.6	1.5	0	14	0	0	T	TGME49_245620	819	62	76	49	8	0.015873	0.194805	0.02	0.111111	12.2727	5.55556
TGME49_245680:239	0	10	0	13	T	TGME49_245680	239	33	42	24	20	0.0294118	0.255814	0.04	0.666667	8.69767	16.6667	13	56	1	71	T	TGME49_245680	239	704	422	106	378	0.0198582	0.134752	0.0186916	0.189974	6.78571	10.1636
TGME49_245680:244	0	41	0	34	T	TGME49_245680	244	33	86	21	67	0.0294118	0.482759	0.0454546	0.514706	16.4138	11.3235	73	235	0	171	T	TGME49_245680	244	791	644	106	595	0.0934343	0.365891	0.00934579	0.288591	3.91603	30.8792
TGME49_245680:981	0	27	3	29	T	TGME49_245680	981	76	60	11	49	0.012987	0.459016	0.333333	0.6	35.3443	1.8	0	101	0	51	T	TGME49_245680	981	229	365	71	88	0.00434783	0.278689	0.0138889	0.58427	64.0984	42.0674
TGME49_246550:1637	0	5	1	1	T	TGME49_246550	1637	29	44	45	20	0.0333333	0.133333	0.0434783	0.0952381	4	2.19048	0	14	0	5	T	TGME49_246550	1637	23	78	45	85	0.0416667	0.189873	0.0217391	0.0697674	4.55696	3.2093
TGME49_246550:1788	0	9	0	1	T	TGME49_246550	1788	16	31	9	36	0.0588235	0.3125	0.1	0.054054	5.3125	0.54054	0	13	0	14	T	TGME49_246550	1788	89	72	73	27	0.0111111	0.191781	0.0135135	0.535714	17.2603	39.6429
TGME49_246550:2304	0	10	1	5	T	TGME49_246550	2304	94	68	42	72	0.0105263	0.15942	0.0465116	0.0821918	15.1449	1.76712	1	19	32	0	T	TGME49_246550	2304	83	93	94	79	0.0238095	0.212766	0.347368	0.0125	8.93617	0.0359848
TGME49_246550:442	0	11	1	20	T	TGME49_246550	442	43	55	33	79	0.0227273	0.214286	0.0588235	0.2625	9.42857	4.4625	0	19	0	5	T	TGME49_246550	442	25	39	13	22	0.0384615	0.5	0.0714286	0.26087	13	3.65217
TGME49_246940:2280	0	8	0	8	T	TGME49_246940	2280	59	54	12	78	0.0166667	0.163636	0.0769231	0.113924	9.81818	1.48101	8	18	0	5	T	TGME49_246940	2280	137	60	55	108	0.0652174	0.311475	0.0178571	0.0550459	4.77596	3.08257
TGME49_246940:2427	0	9	2	0	T	TGME49_246940	2427	54	42	14	31	0.0181818	0.232558	0.2	0.03125	12.7907	0.15625	0	7	0	13	T	TGME49_246940	2427	55	56	3	62	0.0178571	0.140351	0.25	0.222222	7.85965	0.888889
TGME49_246940:2443	0	8	2	0	T	TGME49_246940	2443	42	38	8	23	0.0232558	0.230769	0.333333	0.0416667	9.92308	0.125	0	17	0	0	T	TGME49_246940	2443	98	85	36	55	0.010101	0.209302	0.027027	0.0178571	20.7209	0.660714
TGME49_246940:316	0	7	1	11	T	TGME49_246940	316	25	57	4	37	0.0384615	0.137931	0.4	0.31579	3.58621	0.789474	4	14	0	0	T	TGME49_246940	316	179	69	48	66	0.0277778	0.214286	0.0204082	0.0149254	7.71429	0.731343
TGME49_247030:1656	0	8	0	6	T	TGME49_247030	1656	74	64	17	33	0.0133333	0.138461	0.0555556	0.205882	10.3846	3.70588	0	7	0	0	T	TGME49_247030	1656	41	29	48	92	0.0238095	0.266667	0.0204082	0.0107527	11.2	0.526882
TGME49_247030:2643	0	6	0	0	T	TGME49_247030	2643	32	56	9	24	0.030303	0.122807	0.1	0.04	4.05263	0.4	0	6	39	0	T	TGME49_247030	2643	61	21	40	19	0.016129	0.318182	0.97561	0.05	19.7273	0.05125
TGME49_247030:3275	0	12	5	7	T	TGME49_247030	3275	41	38	19	36	0.0238095	0.333333	0.3	0.216216	14	0.720721	2	25	13	26	T	TGME49_247030	3275	47	53	56	61	0.0625	0.481481	0.245614	0.435484	7.7037	1.77304
TGME49_247220:1288	0	9	0	0	T	TGME49_247220	1288	32	34	33	38	0.030303	0.285714	0.0294118	0.025641	9.42857	0.871795	0	24	0	11	T	TGME49_247220	1288	208	175	32	109	0.00478469	0.142045	0.030303	0.109091	29.6875	3.6
TGME49_247220:160	0	9	0	1	T	TGME49_247220	160	31	50	11	29	0.03125	0.196078	0.0833333	0.0666667	6.27451	0.8	0	13	0	12	T	TGME49_247220	160	60	96	27	119	0.0163934	0.14433	0.0357143	0.108333	8.80412	3.03333
TGME49_247220:161	0	14	0	4	T	TGME49_247220	161	31	61	11	33	0.03125	0.241935	0.0833333	0.147059	7.74193	1.76471	0	19	0	17	T	TGME49_247220	161	60	115	27	136	0.0163934	0.172414	0.0357143	0.131387	10.5172	3.67883
TGME49_247220:1711	0	18	0	5	T	TGME49_247220	1711	27	64	33	22	0.0357143	0.292308	0.0294118	0.26087	8.18462	8.86956	2	17	0	6	T	TGME49_247220	1711	114	120	44	61	0.026087	0.14876	0.0222222	0.112903	5.70248	5.08065
TGME49_247220:1772	0	6	0	2	T	TGME49_247220	1772	33	43	11	35	0.0294118	0.159091	0.0833333	0.0833333	5.40909	1	0	13	0	0	T	TGME49_247220	1772	70	108	1	55	0.0140845	0.12844	0.5	0.0178571	9.11927	0.0357143
TGME49_247220:1918	0	7	0	5	T	TGME49_247220	1918	44	46	13	51	0.0222222	0.170213	0.0714286	0.115385	7.65957	1.61539	9	24	16	0	T	TGME49_247220	1918	173	84	27	30	0.0574713	0.294118	0.607143	0.0322581	5.11765	0.0531309
TGME49_247220:306	0	17	12	20	T	TGME49_247220	306	31	62	28	59	0.03125	0.285714	0.448276	0.35	9.14286	0.780769	0	21	0	0	T	TGME49_247220	306	328	175	5	171	0.00303951	0.125	0.166667	0.00581395	41.125	0.0348837
TGME49_247220:786	0	14	0	7	T	TGME49_247220	786	17	33	10	53	0.0555556	0.441177	0.0909091	0.148148	7.94118	1.62963	0	11	0	31	T	TGME49_247220	786	51	68	49	54	0.0192308	0.173913	0.02	0.581818	9.04348	29.0909
TGME49_247350:1282	0	5	0	0	T	TGME49_247350	1282	35	16	14	5	0.0277778	0.352941	0.0666667	0.166667	12.7059	2.5	0	11	0	42	T	TGME49_247350	1282	23	81	11	59	0.0416667	0.146341	0.0833333	0.716667	3.5122	8.6
TGME49_247350:1427	0	9	0	2	T	TGME49_247350	1427	68	30	22	22	0.0144928	0.322581	0.0434783	0.130435	22.2581	3	5	10	0	0	T	TGME49_247350	1427	163	82	54	57	0.0365854	0.13253	0.0181818	0.0172414	3.62249	0.948276
TGME49_247350:1598	0	6	0	1	T	TGME49_247350	1598	48	30	10	37	0.0204082	0.225806	0.0909091	0.0526316	11.0645	0.578947	0	11	0	0	T	TGME49_247350	1598	100	53	74	30	0.00990099	0.222222	0.0133333	0.0322581	22.4444	2.41935
TGME49_247400:1074	0	6	0	0	T	TGME49_247400	1074	8	17	11	11	0.111111	0.388889	0.0833333	0.0833333	3.5	1	0	12	0	0	T	TGME49_247400	1074	70	40	7	15	0.0140845	0.317073	0.125	0.0625	22.5122	0.5
TGME49_247400:1143	0	14	3	13	T	TGME49_247400	1143	62	32	10	40	0.015873	0.454545	0.363636	0.341463	28.6364	0.939024	0	22	0	0	T	TGME49_247400	1143	25	48	11	10	0.0384615	0.469388	0.0833333	0.0909091	12.2041	1.09091
TGME49_247400:1144	0	5	0	0	T	TGME49_247400	1144	62	37	10	40	0.015873	0.157895	0.0909091	0.0243902	9.94737	0.268293	0	8	22	12	T	TGME49_247400	1144	25	55	33	22	0.0384615	0.160714	0.676471	0.565217	4.17857	0.835539
TGME49_247440:2241	2	11	1	15	T	TGME49_247440	2241	71	38	5	35	0.0416667	0.307692	0.333333	0.444444	7.38462	1.33333	0	40	0	15	T	TGME49_247440	2241	49	69	42	17	0.02	0.585714	0.0232558	0.888889	29.2857	38.2222
TGME49_247440:2400	0	5	0	13	T	TGME49_247440	2400	16	14	7	38	0.0588235	0.4	0.125	0.358974	6.8	2.8718	1	8	15	7	T	TGME49_247440	2400	79	42	125	59	0.025	0.209302	0.126984	0.133333	8.37209	1.05
TGME49_247440:3270	0	8	0	0	T	TGME49_247440	3270	34	34	3	14	0.0285714	0.257143	0.25	0.0666667	9	0.266667	0	12	0	0	T	TGME49_247440	3270	71	31	13	26	0.0138889	0.40625	0.0714286	0.037037	29.25	0.518519
TGME49_247440:3548	0	10	0	11	T	TGME49_247440	3548	19	37	4	24	0.05	0.289474	0.2	0.48	5.78947	2.4	1	6	0	13	T	TGME49_247440	3548	42	33	16	118	0.0465116	0.205882	0.0588235	0.117647	4.42647	2
TGME49_247510:1783	0	5	0	0	T	TGME49_247510	1783	25	27	12	21	0.0384615	0.214286	0.0769231	0.0454546	5.57143	0.590909	0	19	0	0	T	TGME49_247510	1783	25	32	10	1	0.0384615	0.606061	0.0909091	0.5	15.7576	5.5
TGME49_247510:993	0	6	0	0	T	TGME49_247510	993	39	28	5	12	0.025	0.241379	0.166667	0.0769231	9.65517	0.461539	0	16	0	0	T	TGME49_247510	993	50	51	1	44	0.0196078	0.326923	0.5	0.0222222	16.6731	0.0444444
TGME49_247520:1358	0	13	0	2	T	TGME49_247520	1358	45	98	25	34	0.0217391	0.141414	0.0384615	0.0857143	6.50505	2.22857	0	14	0	48	T	TGME49_247520	1358	161	97	5	181	0.00617284	0.153061	0.166667	0.269231	24.7959	1.61538
TGME49_247520:182	0	14	0	7	T	TGME49_247520	182	54	79	19	57	0.0181818	0.1875	0.05	0.137931	10.3125	2.75862	0	21	0	26	T	TGME49_247520	182	111	138	49	173	0.00892857	0.158273	0.02	0.155172	17.7266	7.75862
TGME49_247520:1850	0	9	2	0	T	TGME49_247520	1850	178	63	20	62	0.00558659	0.15625	0.142857	0.015873	27.9688	0.111111	0	14	41	3	T	TGME49_247520	1850	138	104	82	19	0.00719425	0.142857	0.506024	0.2	19.8571	0.395238
TGME49_247520:1876	0	17	8	3	T	TGME49_247520	1876	49	81	25	28	0.02	0.219512	0.346154	0.137931	10.9756	0.398467	0	8	0	0	T	TGME49_247520	1876	96	74	22	61	0.0103093	0.12	0.0434783	0.016129	11.64	0.370968
TGME49_247520:2109	0	10	0	4	T	TGME49_247520	2109	41	35	8	30	0.0238095	0.305556	0.111111	0.16129	12.8333	1.45161	0	23	0	38	T	TGME49_247520	2109	113	90	135	73	0.00877193	0.263736	0.00735294	0.527027	30.0659	71.6757
TGME49_247520:2116	0	10	0	11	T	TGME49_247520	2116	94	67	20	54	0.0105263	0.161765	0.0476191	0.218182	15.3676	4.58182	3	23	43	35	T	TGME49_247520	2116	460	175	338	162	0.00867679	0.136364	0.129794	0.220859	15.7159	1.70162
TGME49_247520:335	0	8	0	8	T	TGME49_247520	335	43	73	19	58	0.0227273	0.121622	0.05	0.152542	5.35135	3.05085	4	27	25	15	T	TGME49_247520	335	203	152	150	190	0.0245098	0.183007	0.172185	0.0837696	7.46667	0.486508
TGME49_247520:499	0	9	0	24	T	TGME49_247520	499	62	56	11	56	0.015873	0.175439	0.0833333	0.438597	11.0526	5.26316	0	38	18	0	T	TGME49_247520	499	95	161	58	80	0.0104167	0.240741	0.322034	0.0123457	23.1111	0.0383366
TGME49_247520:796	0	24	0	3	T	TGME49_247520	796	52	114	47	47	0.0188679	0.217391	0.0208333	0.0833333	11.5217	4	0	37	0	0	T	TGME49_247520	796	412	298	102	280	0.00242131	0.12709	0.00970874	0.00355872	52.4883	0.366548
TGME49_247530:1906	0	18	1	16	T	TGME49_247530	1906	46	120	34	78	0.0212766	0.157025	0.0571429	0.21519	7.38016	3.76582	7	18	0	1	T	TGME49_247530	1906	232	120	20	22	0.0343348	0.157025	0.047619	0.0869565	4.57335	1.82609
TGME49_247530:709	0	5	0	0	T	TGME49_247530	709	21	10	9	11	0.0454546	0.545454	0.1	0.0833333	12	0.833333	0	9	0	0	T	TGME49_247530	709	116	50	12	37	0.00854701	0.196078	0.0769231	0.0263158	22.9412	0.342105
TGME49_247550:1246	0	9	0	2	T	TGME49_247550	1246	48	20	7	5	0.0204082	0.476191	0.125	0.5	23.3333	4	0	20	1	42	T	TGME49_247550	1246	51	33	1	47	0.0192308	0.617647	1	0.895833	32.1176	0.895833
TGME49_247550:1820	0	8	0	1	T	TGME49_247550	1820	15	22	2	10	0.0625	0.391304	0.333333	0.181818	6.26087	0.545454	0	13	0	0	T	TGME49_247550	1820	30	50	44	36	0.0322581	0.27451	0.0222222	0.027027	8.5098	1.21622
TGME49_248270:574	0	6	0	0	T	TGME49_248270	574	17	20	3	27	0.0555556	0.333333	0.25	0.0357143	6	0.142857	0	15	0	11	T	TGME49_248270	574	42	24	17	11	0.0232558	0.64	0.0555556	1	27.52	18
TGME49_248340:345	0	9	0	1	T	TGME49_248340	345	17	28	23	36	0.0555556	0.344828	0.0416667	0.054054	6.2069	1.2973	0	8	29	0	T	TGME49_248340	345	34	37	29	19	0.0285714	0.236842	1	0.05	8.28947	0.05
TGME49_248390:1254	0	53	0	54	T	TGME49_248390	1254	237	189	97	158	0.00420168	0.28421	0.0102041	0.345912	67.6421	33.8994	38	188	0	65	T	TGME49_248390	1254	365	500	71	160	0.106557	0.377246	0.0138889	0.409938	3.5403	29.5155
TGME49_248480:243	0	12	0	13	T	TGME49_248480	243	50	56	40	39	0.0196078	0.22807	0.0243902	0.35	11.6316	14.35	11	103	0	62	T	TGME49_248480	243	388	478	44	180	0.0308483	0.217119	0.0222222	0.348066	7.03827	15.663
TGME49_248480:394	0	26	7	11	T	TGME49_248480	394	50	66	21	41	0.0196078	0.402985	0.363636	0.285714	20.5522	0.785714	32	118	0	84	T	TGME49_248480	394	697	620	91	347	0.0472779	0.191626	0.0108696	0.244253	4.05319	22.4713
TGME49_248480:464	0	7	0	5	T	TGME49_248480	464	62	58	40	71	0.015873	0.135593	0.0243902	0.0833333	8.54237	3.41667	0	51	0	0	T	TGME49_248480	464	903	385	298	132	0.00110619	0.134715	0.00334448	0.0075188	121.782	2.24812
TGME49_248480:551	0	10	0	4	T	TGME49_248480	551	26	64	22	53	0.037037	0.169231	0.0434783	0.0925926	4.56923	2.12963	1	88	0	35	T	TGME49_248480	551	317	253	106	139	0.00628931	0.350394	0.00934579	0.257143	55.7126	27.5143
TGME49_248480:649	0	29	3	16	T	TGME49_248480	649	70	79	7	39	0.0140845	0.375	0.5	0.425	26.625	0.85	0	61	0	3	T	TGME49_248480	649	169	155	1	39	0.00588235	0.397436	0.5	0.1	67.5641	0.2
TGME49_248700:577	0	10	0	1	T	TGME49_248700	577	61	43	10	39	0.016129	0.25	0.0909091	0.05	15.5	0.55	16	39	0	15	T	TGME49_248700	577	258	157	56	143	0.0656371	0.253165	0.0175439	0.111111	3.85704	6.33333
TGME49_248700:592	0	12	0	3	T	TGME49_248700	592	32	64	28	53	0.030303	0.2	0.0344828	0.0740741	6.6	2.14815	4	39	56	7	T	TGME49_248700	592	230	231	88	185	0.021645	0.172414	0.640449	0.0430108	7.96552	0.0671571
TGME49_248990:2047	0	8	0	5	T	TGME49_248990	2047	29	61	13	69	0.0333333	0.145161	0.0714286	0.0857143	4.35484	1.2	0	8	0	0	T	TGME49_248990	2047	59	56	11	49	0.0166667	0.157895	0.0833333	0.02	9.47368	0.24
TGME49_248990:482	0	7	2	2	T	TGME49_248990	482	46	41	12	31	0.0212766	0.190476	0.230769	0.09375	8.95238	0.40625	0	9	0	30	T	TGME49_248990	482	78	82	72	72	0.0126582	0.120482	0.0136986	0.424658	9.51807	31
TGME49_248990:977	0	5	0	1	T	TGME49_248990	977	69	31	9	15	0.0142857	0.1875	0.1	0.125	13.125	1.25	0	17	4	6	T	TGME49_248990	977	41	37	4	13	0.0238095	0.473684	1	0.5	19.8947	0.5
TGME49_249030:3726	0	5	10	0	T	TGME49_249030	3726	41	34	13	11	0.0238095	0.171429	0.785714	0.0833333	7.2	0.106061	0	8	0	0	T	TGME49_249030	3726	60	34	8	23	0.0163934	0.257143	0.111111	0.0416667	15.6857	0.375
TGME49_249240:1131	0	8	0	6	T	TGME49_249240	1131	47	66	22	79	0.0208333	0.134328	0.0434783	0.0875	6.44776	2.0125	4	21	2	4	T	TGME49_249240	1131	117	134	38	78	0.0423729	0.162963	0.0769231	0.0632911	3.84593	0.822785
TGME49_249240:582	0	7	0	17	T	TGME49_249240	582	52	45	23	71	0.0188679	0.173913	0.0416667	0.25	9.21739	6	2	12	25	2	T	TGME49_249240	582	97	84	61	73	0.0306122	0.152941	0.419355	0.0405405	4.99608	0.0966736
TGME49_249240:596	0	7	0	1	T	TGME49_249240	596	63	52	23	105	0.015625	0.150943	0.0416667	0.0188679	9.66038	0.45283	0	45	10	23	T	TGME49_249240	596	216	180	118	175	0.0046083	0.254144	0.092437	0.136364	55.1492	1.47521
TGME49_249240:646	0	17	0	11	T	TGME49_249240	646	51	55	23	44	0.0192308	0.321429	0.0416667	0.266667	16.7143	6.4	13	29	0	8	T	TGME49_249240	646	195	101	25	112	0.0714286	0.294118	0.0384615	0.079646	4.11765	2.0708
TGME49_249240:760	0	6	0	2	T	TGME49_249240	760	89	48	17	59	0.0111111	0.142857	0.0555556	0.05	12.8571	0.9	0	15	0	0	T	TGME49_249240	760	90	129	14	11	0.010989	0.123077	0.0666667	0.0833333	11.2	1.25
TGME49_249240:848	0	5	0	8	T	TGME49_249240	848	44	41	29	71	0.0222222	0.142857	0.0333333	0.125	6.42857	3.75	1	17	0	12	T	TGME49_249240	848	44	90	14	79	0.0444444	0.197802	0.0666667	0.1625	4.45055	2.4375
TGME49_249250:257	14	44	16	8	T	TGME49_249250	257	272	197	103	145	0.0549451	0.227273	0.163462	0.0616438	4.13636	0.377115	4	93	14	0	T	TGME49_249250	257	496	405	141	219	0.0100604	0.231527	0.105634	0.00454546	23.0138	0.0430303
TGME49_249250:431	0	30	1	32	T	TGME49_249250	431	17	62	1	64	0.0555556	0.492063	1	0.507692	8.85714	0.507692	8	86	0	25	T	TGME49_249250	431	321	342	173	157	0.0279503	0.253644	0.00574713	0.164557	9.07483	28.6329
TGME49_249250:487	1	104	14	46	T	TGME49_249250	487	112	228	44	103	0.0176991	0.458515	0.333333	0.451923	25.9061	1.35577	0	31	0	0	T	TGME49_249250	487	181	196	74	110	0.00549451	0.162437	0.0133333	0.00900901	29.5635	0.675676
TGME49_249270:205	0	5	0	0	T	TGME49_249270	205	30	22	15	38	0.0322581	0.26087	0.0625	0.025641	8.08696	0.410256	1	5	0	11	T	TGME49_249270	205	110	33	16	56	0.018018	0.176471	0.0588235	0.210526	9.79412	3.57895
TGME49_249270:478	0	15	0	23	T	TGME49_249270	478	19	33	5	45	0.05	0.470588	0.166667	0.521739	9.41177	3.13043	0	14	0	0	T	TGME49_249270	478	38	82	75	60	0.025641	0.180723	0.0131579	0.0163934	7.04819	1.2459
TGME49_249300:2200	0	6	0	1	T	TGME49_249300	2200	20	31	28	38	0.0476191	0.21875	0.0344828	0.0512821	4.59375	1.48718	0	13	0	5	T	TGME49_249300	2200	28	69	40	22	0.0344828	0.2	0.0243902	0.26087	5.8	10.6957
TGME49_249300:991	0	5	4	0	T	TGME49_249300	991	34	28	9	27	0.0285714	0.206897	0.5	0.0357143	7.24138	0.0714286	0	16	0	15	T	TGME49_249300	991	67	57	31	18	0.0147059	0.293103	0.03125	0.842105	19.931	26.9474
TGME49_249370:1257	0	7	0	0	T	TGME49_249370	1257	102	41	29	29	0.00970874	0.190476	0.0333333	0.0333333	19.6191	1	1	17	0	0	T	TGME49_249370	1257	168	124	11	110	0.0118343	0.144	0.0833333	0.00900901	12.168	0.108108
TGME49_249370:1293	0	10	0	16	T	TGME49_249370	1293	61	73	32	75	0.016129	0.148649	0.030303	0.223684	9.21622	7.38158	1	24	0	13	T	TGME49_249370	1293	200	197	48	148	0.00995025	0.126263	0.0204082	0.0939597	12.6894	4.60403
TGME49_249370:1401	0	29	0	18	T	TGME49_249370	1401	21	104	41	99	0.0454546	0.285714	0.0238095	0.19	6.28571	7.98	0	32	0	23	T	TGME49_249370	1401	58	87	21	68	0.0169492	0.375	0.0454545	0.347826	22.125	7.65217
TGME49_249370:465	0	22	3	12	T	TGME49_249370	465	41	53	17	33	0.0238095	0.425926	0.222222	0.382353	17.8889	1.72059	0	43	0	0	T	TGME49_249370	465	154	112	47	28	0.00645161	0.389381	0.0208333	0.0344828	60.354	1.65517
TGME49_249370:874	0	16	0	0	T	TGME49_249370	874	51	57	28	29	0.0192308	0.293103	0.0344828	0.0333333	15.2414	0.966667	7	38	0	42	T	TGME49_249370	874	103	140	25	97	0.0769231	0.276596	0.0384615	0.438776	3.59574	11.4082
TGME49_249390:1951	0	6	0	3	T	TGME49_249390	1951	16	28	9	24	0.0588235	0.241379	0.1	0.16	4.10345	1.6	0	7	0	0	T	TGME49_249390	1951	102	28	6	11	0.00970874	0.275862	0.142857	0.0833333	28.4138	0.583333
TGME49_249390:4604	0	5	0	1	T	TGME49_249390	4604	42	22	5	14	0.0232558	0.26087	0.166667	0.133333	11.2174	0.8	0	21	7	0	T	TGME49_249390	4604	56	40	8	16	0.0175439	0.536585	0.888889	0.0588235	30.5854	0.0661765
TGME49_249390:4789	0	10	0	5	T	TGME49_249390	4789	19	33	22	41	0.05	0.323529	0.0434783	0.142857	6.47059	3.28571	0	25	0	22	T	TGME49_249390	4789	94	84	80	71	0.0105263	0.305882	0.0123457	0.319444	29.0588	25.875
TGME49_249425:2779	0	5	2	5	T	TGME49_249425	2779	51	23	12	38	0.0192308	0.25	0.230769	0.153846	13	0.666667	0	11	0	0	T	TGME49_249425	2779	86	67	50	23	0.0114943	0.176471	0.0196078	0.0416667	15.3529	2.125
TGME49_249850:1963	0	7	0	6	T	TGME49_249850	1963	33	24	11	30	0.0294118	0.32	0.0833333	0.225806	10.88	2.70968	2	10	0	0	T	TGME49_249850	1963	105	36	60	34	0.0283019	0.297297	0.0163934	0.0285714	10.5045	1.74286
TGME49_249900:707	0	7	1	13	T	TGME49_249900	707	39	30	15	35	0.025	0.258064	0.125	0.388889	10.3226	3.11111	0	23	0	55	T	TGME49_249900	707	79	94	53	74	0.0125	0.252632	0.0185185	0.746667	20.2105	40.32
TGME49_249970:130	0	30	0	38	T	TGME49_249970	130	12	49	10	52	0.0769231	0.62	0.0909091	0.735849	8.06	8.09434	3	38	0	72	T	TGME49_249970	130	110	100	22	130	0.036036	0.386139	0.0434783	0.557252	10.7153	12.8168
TGME49_249990:1169	0	12	0	15	T	TGME49_249990	1169	73	44	55	78	0.0135135	0.288889	0.0178571	0.202532	21.3778	11.3418	0	18	0	0	T	TGME49_249990	1169	52	152	17	34	0.0188679	0.124183	0.0555556	0.0285714	6.5817	0.514286
TGME49_249990:1254	0	8	0	0	T	TGME49_249990	1254	53	53	31	52	0.0185185	0.166667	0.03125	0.0188679	9	0.603774	0	10	1	0	T	TGME49_249990	1254	65	52	35	17	0.0151515	0.207547	0.0555556	0.0555556	13.6981	1
TGME49_249990:1501	0	13	0	3	T	TGME49_249990	1501	42	87	30	64	0.0232558	0.159091	0.0322581	0.0615385	6.84091	1.90769	4	30	37	57	T	TGME49_249990	1501	206	201	143	164	0.0241546	0.153465	0.263889	0.351515	6.35347	1.33206
TGME49_249990:1680	0	5	2	1	T	TGME49_249990	1680	33	39	19	27	0.0294118	0.15	0.15	0.0714286	5.1	0.476191	0	25	0	0	T	TGME49_249990	1680	109	116	102	36	0.00909091	0.222222	0.00970874	0.027027	24.4444	2.78378
TGME49_249990:203	0	13	5	6	T	TGME49_249990	203	83	50	18	82	0.0119048	0.27451	0.31579	0.0843374	23.0588	0.267068	0	8	0	0	T	TGME49_249990	203	63	49	65	17	0.015625	0.18	0.0151515	0.0555556	11.52	3.66667
TGME49_249990:2136	0	5	0	0	T	TGME49_249990	2136	38	33	28	33	0.025641	0.176471	0.0344828	0.0294118	6.88235	0.852941	0	16	0	2	T	TGME49_249990	2136	114	130	72	85	0.00869565	0.129771	0.0136986	0.0348837	14.9237	2.54651
TGME49_249990:258	0	15	2	18	T	TGME49_249990	258	38	87	41	99	0.025641	0.181818	0.0714286	0.19	7.09091	2.66	0	10	0	16	T	TGME49_249990	258	135	72	2	25	0.00735294	0.150685	0.333333	0.653846	20.4932	1.96154
TGME49_249990:3098	0	19	0	31	T	TGME49_249990	3098	53	55	21	97	0.0185185	0.357143	0.0454546	0.326531	19.2857	7.18367	0	15	0	0	T	TGME49_249990	3098	121	63	16	100	0.00819672	0.25	0.0588235	0.00990099	30.5	0.168317
TGME49_249990:3182	0	5	0	2	T	TGME49_249990	3182	49	49	38	37	0.02	0.12	0.025641	0.0789474	6	3.07895	0	18	0	0	T	TGME49_249990	3182	192	151	148	47	0.00518135	0.125	0.00671141	0.0208333	24.125	3.10417
TGME49_249990:3402	0	10	1	10	T	TGME49_249990	3402	21	35	28	50	0.0454546	0.305556	0.0689655	0.215686	6.72222	3.12745	0	16	0	0	T	TGME49_249990	3402	132	120	211	99	0.0075188	0.140496	0.00471698	0.01	18.686	2.12
TGME49_249990:3582	0	9	0	6	T	TGME49_249990	3582	58	48	16	56	0.0169491	0.204082	0.0588235	0.122807	12.0408	2.08772	0	8	0	0	T	TGME49_249990	3582	57	61	75	21	0.0172414	0.145161	0.0131579	0.0454545	8.41935	3.45455
TGME49_249990:634	0	15	10	6	T	TGME49_249990	634	30	66	33	46	0.0322581	0.238806	0.323529	0.148936	7.40299	0.460348	0	7	0	0	T	TGME49_249990	634	75	36	1	2	0.0131579	0.216216	0.5	0.333333	16.4324	0.666667
TGME49_249990:860	0	10	0	23	T	TGME49_249990	860	31	60	35	126	0.03125	0.180328	0.0277778	0.188976	5.77049	6.80315	2	29	0	8	T	TGME49_249990	860	109	147	27	162	0.0272727	0.202703	0.0357143	0.0552147	7.43243	1.54601
TGME49_250115:1821	0	6	0	0	T	TGME49_250115	1821	21	27	10	29	0.0454546	0.25	0.0909091	0.0333333	5.5	0.366667	0	5	0	0	T	TGME49_250115	1821	33	33	53	12	0.0294118	0.176471	0.0185185	0.0769231	6	4.15385
TGME49_250115:28	0	19	0	15	T	TGME49_250115	28	25	49	21	47	0.0384615	0.4	0.0454546	0.333333	10.4	7.33333	14	58	23	45	T	TGME49_250115	28	445	350	353	150	0.0336323	0.168091	0.0677966	0.304636	4.99791	4.49338
TGME49_250710:2228	18	73	6	66	T	TGME49_250710	2228	401	428	167	641	0.0472637	0.172494	0.0416667	0.104361	3.64961	2.50467	15	67	31	100	T	TGME49_250710	2228	303	262	87	248	0.0526316	0.258555	0.363636	0.405622	4.91255	1.11546
TGME49_250770:1618	0	11	0	2	T	TGME49_250770	1618	42	27	12	28	0.0232558	0.428571	0.0769231	0.103448	18.4286	1.34483	20	93	0	49	T	TGME49_250770	1618	193	238	173	142	0.108247	0.393305	0.00574713	0.34965	3.63339	60.8392
TGME49_250770:1781	0	5	0	0	T	TGME49_250770	1781	60	21	12	26	0.0163934	0.272727	0.0769231	0.037037	16.6364	0.481482	11	35	0	22	T	TGME49_250770	1781	194	130	46	133	0.0615385	0.274809	0.0212766	0.171642	4.46565	8.06716
TGME49_250770:405	0	6	0	13	T	TGME49_250770	405	67	40	10	49	0.0147059	0.170732	0.0909091	0.28	11.6098	3.08	5	32	0	0	T	TGME49_250770	405	167	143	33	103	0.0357143	0.229167	0.0294118	0.00961539	6.41667	0.326923
TGME49_250770:778	0	5	0	0	T	TGME49_250770	778	13	22	17	6	0.0714286	0.26087	0.0555556	0.142857	3.65217	2.57143	13	60	0	23	T	TGME49_250770	778	208	170	115	81	0.0669856	0.356725	0.00862069	0.292683	5.3254	33.9512
TGME49_250810:1214	0	15	0	11	T	TGME49_250810	1214	38	84	16	75	0.025641	0.188235	0.0588235	0.157895	7.34118	2.68421	0	36	0	4	T	TGME49_250810	1214	254	175	93	84	0.00392157	0.210227	0.0106383	0.0588235	53.608	5.52941
TGME49_250810:1774	0	52	3	72	T	TGME49_250810	1774	59	130	21	116	0.0166667	0.40458	0.181818	0.623932	24.2748	3.43162	2	73	6	26	T	TGME49_250810	1774	152	255	6	115	0.0196078	0.289062	1	0.232759	14.7422	0.232759
TGME49_250880:868	0	12	0	10	T	TGME49_250880	868	11	19	8	24	0.0833333	0.65	0.111111	0.44	7.8	3.96	6	20	0	13	T	TGME49_250880	868	69	57	77	71	0.1	0.362069	0.0128205	0.194444	3.62069	15.1667
TGME49_251180:5684	0	5	0	1	T	TGME49_251180	5684	34	34	9	33	0.0285714	0.171429	0.1	0.0588235	6	0.588235	0	21	0	0	T	TGME49_251180	5684	135	121	134	144	0.00735294	0.180328	0.00740741	0.00689655	24.5246	0.931034
TGME49_251540:1182	0	11	0	6	T	TGME49_251540	1182	60	56	19	38	0.0163934	0.210526	0.05	0.179487	12.8421	3.58974	2	18	9	0	T	TGME49_251540	1182	112	138	105	2	0.0265487	0.136691	0.0943396	0.333333	5.14868	3.53333
TGME49_251540:303	0	28	0	24	T	TGME49_251540	303	121	105	26	86	0.00819672	0.273585	0.037037	0.287356	33.3774	7.75862	0	34	0	23	T	TGME49_251540	303	317	160	131	164	0.00314465	0.217391	0.00757576	0.145455	69.1304	19.2
TGME49_251540:549	0	14	1	21	T	TGME49_251540	549	31	81	29	81	0.03125	0.182927	0.0666667	0.268293	5.85366	4.02439	2	31	0	0	T	TGME49_251540	549	103	104	37	144	0.0288462	0.304762	0.0263158	0.00689655	10.5651	0.262069
TGME49_251680:1561	0	7	0	1	T	TGME49_251680	1561	25	13	22	38	0.0384615	0.571429	0.0434783	0.0512821	14.8571	1.17949	1	36	0	0	T	TGME49_251680	1561	98	174	94	35	0.020202	0.211429	0.0105263	0.0277778	10.4657	2.63889
TGME49_251680:1995	0	15	0	3	T	TGME49_251680	1995	23	43	13	28	0.0416667	0.363636	0.0714286	0.137931	8.72727	1.93103	0	31	0	0	T	TGME49_251680	1995	154	108	88	16	0.00645161	0.293578	0.011236	0.0588235	45.5046	5.23529
TGME49_251780:2892	0	5	0	5	T	TGME49_251780	2892	58	31	13	17	0.0169491	0.1875	0.0714286	0.333333	11.0625	4.66667	0	9	0	8	T	TGME49_251780	2892	59	46	11	73	0.0166667	0.212766	0.0833333	0.121622	12.766	1.45946
TGME49_251780:341	0	13	0	11	T	TGME49_251780	341	18	24	14	12	0.0526316	0.56	0.0666667	0.923077	10.64	13.8461	0	12	0	0	T	TGME49_251780	341	44	49	18	19	0.0222222	0.26	0.0526316	0.05	11.7	0.95
TGME49_251810:831	0	10	0	17	T	TGME49_251810	831	39	37	10	60	0.025	0.289474	0.0909091	0.295082	11.579	3.2459	0	22	0	0	T	TGME49_251810	831	215	177	110	50	0.00462963	0.129213	0.00900901	0.0196078	27.9101	2.17647
TGME49_252210:6465	0	9	0	0	T	TGME49_252210	6465	52	29	6	35	0.0188679	0.333333	0.142857	0.0277778	17.6667	0.194444	0	5	0	0	T	TGME49_252210	6465	131	37	28	10	0.00757576	0.157895	0.0344828	0.0909091	20.8421	2.63636
TGME49_252360:1875	0	5	4	2	T	TGME49_252360	1875	33	26	16	35	0.0294118	0.222222	0.294118	0.0833333	7.55556	0.283333	0	9	0	36	T	TGME49_252360	1875	84	34	4	84	0.0117647	0.285714	0.2	0.435294	24.2857	2.17647
TGME49_252390:1620	0	12	0	2	T	TGME49_252390	1620	11	30	5	21	0.0833333	0.419355	0.166667	0.136364	5.03226	0.818182	1	49	0	6	T	TGME49_252390	1620	50	135	10	11	0.0392157	0.367647	0.0909091	0.583333	9.375	6.41667
TGME49_252430:5683	0	6	0	2	T	TGME49_252430	5683	15	19	10	11	0.0625	0.35	0.0909091	0.25	5.6	2.75	0	5	0	0	T	TGME49_252430	5683	104	41	3	25	0.00952381	0.142857	0.25	0.0384615	15	0.153846
TGME49_252630:965	0	6	0	0	T	TGME49_252630	965	6	12	6	43	0.142857	0.538462	0.142857	0.0227273	3.76923	0.159091	0	11	0	0	T	TGME49_252630	965	43	25	25	23	0.0227273	0.461538	0.0384615	0.0416667	20.3077	1.08333
TGME49_253170:10328	0	7	0	1	T	TGME49_253170	10328	58	41	16	18	0.0169491	0.190476	0.0588235	0.105263	11.2381	1.78947	0	8	0	13	T	TGME49_253170	10328	27	32	26	43	0.0357143	0.272727	0.037037	0.318182	7.63636	8.59091
TGME49_253170:10329	0	5	0	6	T	TGME49_253170	10329	58	42	16	22	0.0169491	0.139535	0.0588235	0.304348	8.23256	5.17391	0	8	0	3	T	TGME49_253170	10329	27	36	26	46	0.0357143	0.243243	0.037037	0.0851064	6.81081	2.29787
TGME49_253170:10510	0	7	0	2	T	TGME49_253170	10510	37	32	10	12	0.0263158	0.242424	0.0909091	0.230769	9.21212	2.53846	2	15	0	0	T	TGME49_253170	10510	50	38	14	12	0.0588235	0.410256	0.0666667	0.0769231	6.97436	1.15385
TGME49_253170:10802	0	46	6	55	T	TGME49_253170	10802	127	125	40	149	0.0078125	0.373016	0.170732	0.373333	47.746	2.18667	19	103	15	77	T	TGME49_253170	10802	205	255	61	242	0.0970874	0.40625	0.258065	0.320988	4.18438	1.24383
TGME49_253430:1478	0	10	0	0	T	TGME49_253430	1478	48	86	31	62	0.0204082	0.126437	0.03125	0.015873	6.1954	0.507937	0	5	0	0	T	TGME49_253430	1478	81	44	31	52	0.0121951	0.133333	0.03125	0.0188679	10.9333	0.603774
TGME49_253430:1748	0	15	1	20	T	TGME49_253430	1748	51	79	10	91	0.0192308	0.2	0.181818	0.228261	10.4	1.25544	0	8	0	35	T	TGME49_253430	1748	33	62	28	58	0.0294118	0.142857	0.0344828	0.610169	4.85714	17.6949
TGME49_253430:2206	0	9	0	1	T	TGME49_253430	2206	81	81	22	42	0.0121951	0.121951	0.0434783	0.0465116	10	1.06977	0	8	0	11	T	TGME49_253430	2206	38	47	18	11	0.025641	0.1875	0.0526316	1	7.3125	19
TGME49_253430:2211	0	12	0	4	T	TGME49_253430	2211	58	63	22	40	0.0169491	0.203125	0.0434783	0.121951	11.9844	2.80488	0	8	0	0	T	TGME49_253430	2211	69	74	18	24	0.0142857	0.12	0.0526316	0.04	8.4	0.76
TGME49_253690:1179	0	8	0	2	T	TGME49_253690	1179	51	62	28	62	0.0192308	0.142857	0.0344828	0.0476191	7.42857	1.38095	0	12	6	18	T	TGME49_253690	1179	29	96	113	162	0.0333333	0.134021	0.0614035	0.116564	4.02062	1.89833
TGME49_253690:426	0	34	3	21	T	TGME49_253690	426	46	99	21	135	0.0212766	0.35	0.181818	0.161765	16.45	0.889706	10	75	7	12	T	TGME49_253690	426	287	220	144	91	0.0381944	0.343891	0.0551724	0.141304	9.0037	2.56114
TGME49_253690:493	0	27	7	5	T	TGME49_253690	493	166	112	80	113	0.00598802	0.247788	0.0987654	0.0526316	41.3805	0.532895	5	78	1	94	T	TGME49_253690	493	328	349	198	256	0.0182371	0.225714	0.0100503	0.36965	12.3767	36.7802
TGME49_253690:606	0	25	6	18	T	TGME49_253690	606	60	115	26	129	0.0163934	0.224138	0.259259	0.146154	13.6724	0.563736	0	33	0	70	T	TGME49_253690	606	249	244	103	269	0.004	0.138776	0.00961539	0.262963	34.6939	27.3481
TGME49_253690:673	0	14	0	14	T	TGME49_253690	673	48	104	41	91	0.0204082	0.142857	0.0238095	0.163044	7	6.84783	9	36	41	57	T	TGME49_253690	673	349	185	87	184	0.0285714	0.198925	0.477273	0.313514	6.96237	0.656885
TGME49_253820:1175	0	6	1	5	T	TGME49_253820	1175	36	34	3	27	0.027027	0.2	0.5	0.214286	7.4	0.428571	0	11	0	1	T	TGME49_253820	1175	60	44	18	16	0.0163934	0.266667	0.0526316	0.117647	16.2667	2.23529
TGME49_253820:941	0	9	1	3	T	TGME49_253820	941	14	40	11	44	0.0666667	0.243902	0.166667	0.0888889	3.65854	0.533333	0	14	0	0	T	TGME49_253820	941	119	69	99	35	0.00833333	0.214286	0.01	0.0277778	25.7143	2.77778
TGME49_253820:972	0	20	0	16	T	TGME49_253820	972	13	58	20	39	0.0714286	0.355932	0.0476191	0.425	4.98305	8.925	9	26	0	0	T	TGME49_253820	972	204	116	122	81	0.0487805	0.230769	0.00813008	0.0121951	4.73077	1.5
TGME49_254120:1031	0	5	0	1	T	TGME49_254120	1031	35	44	6	38	0.0277778	0.133333	0.142857	0.0512821	4.8	0.358974	0	18	16	16	T	TGME49_254120	1031	152	133	69	100	0.00653595	0.141791	0.242857	0.168317	21.694	0.693069
TGME49_254120:1376	0	14	2	11	T	TGME49_254120	1376	18	79	14	19	0.0526316	0.1875	0.2	0.6	3.5625	3	0	13	0	0	T	TGME49_254120	1376	64	75	4	37	0.0153846	0.184211	0.2	0.0263158	11.9737	0.131579
TGME49_254120:734	0	14	0	3	T	TGME49_254120	734	78	83	39	43	0.0126582	0.178571	0.025	0.0909091	14.1071	3.63636	0	54	24	13	T	TGME49_254120	734	128	143	118	84	0.00775194	0.381944	0.210084	0.164706	49.2708	0.784
TGME49_254120:851	0	45	2	15	T	TGME49_254120	851	86	112	18	60	0.0114942	0.40708	0.157895	0.262295	35.4159	1.6612	3	20	0	4	T	TGME49_254120	851	97	107	53	12	0.0408163	0.194444	0.0185185	0.384615	4.76389	20.7692
TGME49_254120:855	1	57	1	58	T	TGME49_254120	855	72	180	16	124	0.0273973	0.320442	0.117647	0.472	11.6961	4.012	6	33	0	0	T	TGME49_254120	855	107	146	76	25	0.0648148	0.231293	0.012987	0.0384615	3.56851	2.96154
TGME49_254440:201	0	31	4	49	T	TGME49_254440	201	127	97	34	76	0.0078125	0.326531	0.142857	0.649351	41.7959	4.54545	21	65	0	59	T	TGME49_254440	201	819	493	279	374	0.0268293	0.133603	0.00357143	0.16	4.97976	44.8
TGME49_254440:732	0	19	0	12	T	TGME49_254440	732	32	88	10	82	0.030303	0.224719	0.0909091	0.156627	7.41573	1.72289	27	65	0	16	T	TGME49_254440	732	933	377	57	152	0.0299786	0.174603	0.0172414	0.111111	5.82426	6.44444
TGME49_254470:2076	0	8	0	2	T	TGME49_254470	2076	33	43	27	13	0.0294118	0.204545	0.0357143	0.214286	6.95455	6	8	22	0	11	T	TGME49_254470	2076	222	139	9	62	0.0403587	0.164286	0.1	0.190476	4.07063	1.90476
TGME49_254470:2307	0	7	0	0	T	TGME49_254470	2307	25	25	7	20	0.0384615	0.307692	0.125	0.0476191	8	0.380952	0	9	0	0	T	TGME49_254470	2307	45	65	7	24	0.0217391	0.151515	0.125	0.04	6.9697	0.32
TGME49_254470:2528	0	5	0	2	T	TGME49_254470	2528	27	26	9	12	0.0357143	0.222222	0.1	0.230769	6.22222	2.30769	0	11	0	0	T	TGME49_254470	2528	69	57	28	1	0.0142857	0.206897	0.0344828	0.5	14.4828	14.5
TGME49_254470:2592	0	7	2	5	T	TGME49_254470	2592	59	29	7	23	0.0166667	0.266667	0.375	0.25	16	0.666667	0	8	0	0	T	TGME49_254470	2592	36	59	1	81	0.027027	0.15	0.5	0.0121951	5.55	0.0243902
TGME49_254470:780	0	6	0	1	T	TGME49_254470	780	32	36	5	11	0.030303	0.189189	0.166667	0.166667	6.24324	1	0	19	0	0	T	TGME49_254470	780	30	75	1	29	0.0322581	0.263158	0.5	0.0333333	8.15789	0.0666667
TGME49_254720:1120	0	34	1	41	T	TGME49_254720	1120	159	139	48	123	0.00625	0.25	0.0408163	0.33871	40	8.29839	25	97	21	58	T	TGME49_254720	1120	719	585	298	437	0.0361111	0.167235	0.0735786	0.134703	4.63114	1.83074
TGME49_254720:340	0	118	25	64	T	TGME49_254720	340	296	431	149	366	0.003367	0.275463	0.173333	0.177112	81.8125	1.0218	48	282	0	148	T	TGME49_254720	340	1200	1258	508	953	0.0407993	0.224782	0.00196464	0.156184	5.50944	79.4979
TGME49_254720:884	0	80	8	53	T	TGME49_254720	884	192	273	139	254	0.00518135	0.29562	0.0642857	0.211765	57.0547	3.29412	23	224	43	207	T	TGME49_254720	884	1944	1620	612	1216	0.0123393	0.138803	0.0717781	0.170912	11.2488	2.38112
TGME49_255060:1022	0	6	0	1	T	TGME49_255060	1022	25	30	24	30	0.0384615	0.225806	0.04	0.0645161	5.87097	1.6129	0	5	0	0	T	TGME49_255060	1022	46	18	13	24	0.0212766	0.315789	0.0714286	0.04	14.8421	0.56
TGME49_255260:1042	0	14	0	3	T	TGME49_255260	1042	81	75	47	72	0.0121951	0.197368	0.0208333	0.0547945	16.1842	2.63014	0	33	0	11	T	TGME49_255260	1042	209	207	15	202	0.00476191	0.163462	0.0625	0.0591133	34.3269	0.945813
TGME49_255260:1314	0	12	2	12	T	TGME49_255260	1314	91	101	61	76	0.0108696	0.127451	0.0483871	0.168831	11.7255	3.48918	4	45	0	0	T	TGME49_255260	1314	81	134	59	33	0.0609756	0.340741	0.0166667	0.0294118	5.58815	1.76471
TGME49_255260:2045	0	10	0	13	T	TGME49_255260	2045	21	50	34	91	0.0454546	0.215686	0.0285714	0.152174	4.7451	5.32609	0	9	0	25	T	TGME49_255260	2045	114	66	26	74	0.00869565	0.149254	0.037037	0.346667	17.1642	9.36
TGME49_255260:2168	0	20	0	6	T	TGME49_255260	2168	136	104	65	74	0.00729927	0.2	0.0151515	0.0933333	27.4	6.16	0	14	0	15	T	TGME49_255260	2168	82	82	44	130	0.0120482	0.180723	0.0222222	0.122137	15	5.49618
TGME49_255260:2437	0	15	0	17	T	TGME49_255260	2437	84	112	51	122	0.0117647	0.141593	0.0192308	0.146342	12.0354	7.60976	3	10	0	12	T	TGME49_255260	2437	151	57	54	57	0.0263158	0.189655	0.0181818	0.224138	7.2069	12.3276
TGME49_255260:2618	0	11	0	14	T	TGME49_255260	2618	111	92	41	120	0.00892857	0.129032	0.0238095	0.123967	14.4516	5.20661	0	9	0	7	T	TGME49_255260	2618	113	70	47	74	0.00877193	0.140845	0.0208333	0.106667	16.0563	5.12
TGME49_255260:3068	0	10	0	1	T	TGME49_255260	3068	43	57	26	32	0.0227273	0.189655	0.037037	0.0606061	8.34483	1.63636	0	8	0	30	T	TGME49_255260	3068	45	67	27	168	0.0217391	0.132353	0.0357143	0.183432	6.08824	5.13609
TGME49_255260:354	0	16	11	24	T	TGME49_255260	354	77	66	40	70	0.0128205	0.253731	0.292683	0.352113	19.791	1.20305	3	19	0	6	T	TGME49_255260	354	308	140	45	242	0.012945	0.141844	0.0217391	0.0288066	10.9574	1.3251
TGME49_255260:426	3	28	0	38	T	TGME49_255260	426	73	115	22	143	0.054054	0.25	0.0434783	0.270833	4.625	6.22917	5	36	0	0	T	TGME49_255260	426	223	150	84	62	0.0267857	0.245033	0.0117647	0.015873	9.1479	1.34921
TGME49_255260:637	0	11	0	5	T	TGME49_255260	637	68	83	27	50	0.0144928	0.142857	0.0357143	0.117647	9.85714	3.29412	0	24	6	0	T	TGME49_255260	637	247	206	98	88	0.00403226	0.120773	0.0707071	0.011236	29.9517	0.158909
TGME49_255900:147	0	8	0	6	T	TGME49_255900	147	33	34	27	48	0.0294118	0.257143	0.0357143	0.142857	8.74286	4	0	11	0	16	T	TGME49_255900	147	202	89	4	113	0.00492611	0.133333	0.2	0.149123	27.0667	0.745614
TGME49_255900:1703	0	8	0	5	T	TGME49_255900	1703	21	46	18	26	0.0454546	0.191489	0.0526316	0.222222	4.21277	4.22222	0	5	34	0	T	TGME49_255900	1703	46	43	53	28	0.0212766	0.136364	0.648148	0.0344828	6.40909	0.053202
TGME49_256050:351	0	7	0	1	T	TGME49_256050	351	10	24	11	22	0.0909091	0.32	0.0833333	0.0869565	3.52	1.04348	0	5	0	0	T	TGME49_256050	351	32	31	18	12	0.030303	0.1875	0.0526316	0.0769231	6.1875	1.46154
TGME49_257040:959	0	9	0	0	T	TGME49_257040	959	53	36	17	29	0.0185185	0.27027	0.0555556	0.0333333	14.5946	0.6	0	8	0	0	T	TGME49_257040	959	13	35	20	39	0.0714286	0.25	0.047619	0.025	3.5	0.525
TGME49_257090:1067	0	8	0	1	T	TGME49_257090	1067	24	39	10	27	0.04	0.225	0.0909091	0.0714286	5.625	0.785714	12	62	16	0	T	TGME49_257090	1067	194	215	51	91	0.0666667	0.291667	0.326923	0.0108696	4.375	0.0332481
TGME49_257090:1106	0	27	0	15	T	TGME49_257090	1106	14	67	13	52	0.0666667	0.411765	0.0714286	0.301887	6.17647	4.22642	0	96	1	53	T	TGME49_257090	1106	194	259	108	113	0.00512821	0.373077	0.0183486	0.473684	72.75	25.8158
TGME49_257090:713	0	5	0	8	T	TGME49_257090	713	42	44	41	23	0.0232558	0.133333	0.0238095	0.375	5.73333	15.75	0	36	0	2	T	TGME49_257090	713	236	176	25	131	0.00421941	0.20904	0.0384615	0.0227273	49.5424	0.590909
TGME49_257090:722	0	5	0	0	T	TGME49_257090	722	42	40	21	23	0.0232558	0.146342	0.0454546	0.0416667	6.29268	0.916667	0	28	51	0	T	TGME49_257090	722	182	180	51	91	0.00546448	0.160221	1	0.0108696	29.3204	0.0108696
TGME49_257090:889	0	5	0	1	T	TGME49_257090	889	17	26	7	15	0.0555556	0.222222	0.125	0.125	4	1	0	18	0	20	T	TGME49_257090	889	74	81	15	46	0.0133333	0.231707	0.0625	0.446809	17.378	7.14894
TGME49_257380:1012	0	23	0	7	T	TGME49_257380	1012	80	66	28	67	0.0123457	0.358209	0.0344828	0.117647	29.0149	3.41176	14	37	0	0	T	TGME49_257380	1012	179	80	57	44	0.0833333	0.469136	0.0172414	0.0222222	5.62963	1.28889
TGME49_257380:1175	0	15	2	5	T	TGME49_257380	1175	105	77	36	67	0.00943396	0.205128	0.0810811	0.0882353	21.7436	1.08824	2	28	0	41	T	TGME49_257380	1175	165	179	1	193	0.0180723	0.161111	0.5	0.216495	8.91481	0.43299
TGME49_257380:1510	0	19	7	10	T	TGME49_257380	1510	10	44	24	21	0.0909091	0.444444	0.32	0.5	4.88889	1.5625	0	32	0	14	T	TGME49_257380	1510	92	112	12	76	0.0107527	0.292035	0.0769231	0.194805	27.1593	2.53247
TGME49_257380:1550	0	7	0	1	T	TGME49_257380	1550	49	60	22	41	0.02	0.131148	0.0434783	0.0476191	6.55738	1.09524	1	40	0	29	T	TGME49_257380	1550	98	132	56	129	0.020202	0.308271	0.0175439	0.230769	15.2594	13.1538
TGME49_257380:1787	0	5	0	0	T	TGME49_257380	1787	78	43	40	29	0.0126582	0.136364	0.0243902	0.0333333	10.7727	1.36667	0	18	0	31	T	TGME49_257380	1787	157	71	13	113	0.00632911	0.263889	0.0714286	0.280702	41.6944	3.92982
TGME49_257530:1000	0	6	0	11	T	TGME49_257530	1000	23	33	12	47	0.0416667	0.205882	0.0769231	0.25	4.94118	3.25	14	15	3	11	T	TGME49_257530	1000	204	56	137	64	0.0731707	0.280702	0.0289855	0.184615	3.83626	6.36923
TGME49_257530:1206	0	8	0	0	T	TGME49_257530	1206	44	58	20	85	0.0222222	0.152542	0.0476191	0.0116279	6.86441	0.244186	0	11	0	0	T	TGME49_257530	1206	127	57	47	26	0.0078125	0.206897	0.0208333	0.037037	26.4828	1.77778
TGME49_257530:123	0	8	0	0	T	TGME49_257530	123	32	63	35	21	0.030303	0.140625	0.0277778	0.0454546	4.64062	1.63636	0	5	0	0	T	TGME49_257530	123	52	48	21	33	0.0188679	0.122449	0.0454545	0.0294118	6.4898	0.647059
TGME49_257530:2370	0	6	0	2	T	TGME49_257530	2370	57	49	26	45	0.0172414	0.14	0.037037	0.0652174	8.12	1.76087	0	5	0	0	T	TGME49_257530	2370	27	27	65	17	0.0357143	0.214286	0.0151515	0.0555556	6	3.66667
TGME49_257530:2436	0	9	0	6	T	TGME49_257530	2436	29	79	50	52	0.0333333	0.125	0.0196078	0.132076	3.75	6.73585	0	16	0	22	T	TGME49_257530	2436	196	104	34	130	0.00507614	0.161905	0.0285714	0.175573	31.8952	6.14504
TGME49_257530:2711	0	6	0	1	T	TGME49_257530	2711	39	50	41	46	0.025	0.137255	0.0238095	0.0425532	5.4902	1.78723	0	6	0	0	T	TGME49_257530	2711	73	48	37	51	0.0135135	0.142857	0.0263158	0.0192308	10.5714	0.730769
TGME49_257680:489	0	8	0	4	T	TGME49_257680	489	32	43	26	24	0.030303	0.204545	0.037037	0.2	6.75	5.4	6	43	0	13	T	TGME49_257680	489	338	253	140	160	0.020649	0.173228	0.0070922	0.0869565	8.3892	12.2609
TGME49_257680:85	0	8	0	2	T	TGME49_257680	85	53	42	23	17	0.0185185	0.209302	0.0416667	0.166667	11.3023	4	1	39	0	58	T	TGME49_257680	85	209	183	68	105	0.00952381	0.217391	0.0144928	0.556604	22.8261	38.4057
TGME49_257750:796	0	19	3	7	T	TGME49_257750	796	35	37	19	29	0.0277778	0.526316	0.2	0.266667	18.9474	1.33333	0	22	0	1	T	TGME49_257750	796	56	48	11	55	0.0175439	0.469388	0.0833333	0.0357143	26.7551	0.428571
TGME49_258470:1143	0	12	6	13	T	TGME49_258470	1143	83	61	98	118	0.0119048	0.209677	0.0707071	0.117647	17.6129	1.66387	41	76	18	21	T	TGME49_258470	1143	562	293	307	289	0.0746004	0.261905	0.0616883	0.0758621	3.51077	1.22976
TGME49_258470:1253	7	38	7	61	T	TGME49_258470	1253	145	157	117	198	0.0547945	0.246835	0.0677966	0.311558	4.50475	4.59548	6	34	0	76	T	TGME49_258470	1253	314	229	88	306	0.0222222	0.152174	0.011236	0.250814	6.84783	22.3225
TGME49_258470:1335	0	25	32	35	T	TGME49_258470	1335	157	165	135	233	0.00632911	0.156627	0.242647	0.153846	24.747	0.634033	0	34	16	0	T	TGME49_258470	1335	153	95	62	115	0.00649351	0.364583	0.269841	0.00862069	56.1458	0.0319473
TGME49_258470:310	0	20	0	16	T	TGME49_258470	310	44	107	70	134	0.0222222	0.194444	0.0140845	0.125926	8.75	8.94074	8	59	0	38	T	TGME49_258470	310	196	295	84	130	0.0456853	0.202703	0.0117647	0.29771	4.43694	25.3053
TGME49_258470:472	0	15	0	0	T	TGME49_258470	472	35	70	41	76	0.0277778	0.225352	0.0238095	0.012987	8.11268	0.545454	15	43	0	40	T	TGME49_258470	472	593	267	173	207	0.026936	0.164179	0.00574713	0.197115	6.09515	34.2981
TGME49_258470:626	0	34	19	58	T	TGME49_258470	626	110	144	99	205	0.00900901	0.241379	0.2	0.286408	26.7931	1.43204	2	62	0	70	T	TGME49_258470	626	268	191	81	216	0.0111524	0.328125	0.0121951	0.327189	29.4219	26.8295
TGME49_258470:630	0	32	1	6	T	TGME49_258470	630	98	176	71	213	0.010101	0.186441	0.0277778	0.0327103	18.4576	1.17757	0	41	0	68	T	TGME49_258470	630	214	259	117	272	0.00465116	0.161538	0.00847458	0.252747	34.7308	29.8242
TGME49_258470:884	0	48	9	43	T	TGME49_258470	884	160	122	67	145	0.00621118	0.398374	0.147059	0.30137	64.1382	2.04931	20	46	0	34	T	TGME49_258470	884	378	233	155	309	0.055409	0.200855	0.00641026	0.112903	3.62495	17.6129
TGME49_258580:1767	0	5	0	1	T	TGME49_258580	1767	36	39	25	55	0.027027	0.15	0.0384615	0.0357143	5.55	0.928571	0	19	0	0	T	TGME49_258580	1767	134	131	148	72	0.00740741	0.151515	0.00671141	0.0136986	20.4545	2.0411
TGME49_258580:1868	0	14	4	5	T	TGME49_258580	1868	15	47	18	52	0.0625	0.3125	0.263158	0.113208	5	0.430189	0	19	0	0	T	TGME49_258580	1868	61	62	11	62	0.016129	0.31746	0.0833333	0.015873	19.6825	0.190476
TGME49_258580:2220	0	5	0	5	T	TGME49_258580	2220	22	19	18	27	0.0434783	0.3	0.0526316	0.214286	6.9	4.07143	0	8	0	0	T	TGME49_258580	2220	103	43	88	62	0.00961539	0.204545	0.011236	0.015873	21.2727	1.4127
TGME49_258580:946	0	5	0	0	T	TGME49_258580	946	24	27	3	26	0.04	0.214286	0.25	0.037037	5.35714	0.148148	0	10	0	0	T	TGME49_258580	946	32	38	20	12	0.030303	0.282051	0.047619	0.0769231	9.30769	1.61538
TGME49_258660:105	0	6	0	1	T	TGME49_258660	105	17	34	3	30	0.0555556	0.2	0.25	0.0645161	3.6	0.258064	0	16	0	0	T	TGME49_258660	105	204	115	15	51	0.00487805	0.146552	0.0625	0.0192308	30.0431	0.307692
TGME49_258660:109	0	21	0	19	T	TGME49_258660	109	17	55	1	55	0.0555556	0.392857	0.5	0.357143	7.07143	0.714286	0	24	0	4	T	TGME49_258660	109	149	136	15	28	0.00666667	0.182482	0.0625	0.172414	27.3723	2.75862
TGME49_258660:1097	0	5	0	0	T	TGME49_258660	1097	16	25	6	5	0.0588235	0.230769	0.142857	0.166667	3.92308	1.16667	0	16	34	30	T	TGME49_258660	1097	51	73	48	84	0.0192308	0.22973	0.714286	0.364706	11.9459	0.510588
TGME49_258820:302	0	6	0	1	T	TGME49_258820	302	18	16	1	20	0.0526316	0.411765	0.5	0.0952381	7.82353	0.190476	0	6	0	0	T	TGME49_258820	302	43	57	14	93	0.0227273	0.12069	0.0666667	0.0106383	5.31034	0.159574
TGME49_258870:3379	0	5	0	12	T	TGME49_258870	3379	31	26	7	17	0.03125	0.222222	0.125	0.722222	7.11111	5.77778	0	5	33	0	T	TGME49_258870	3379	26	20	59	15	0.037037	0.285714	0.566667	0.0625	7.71429	0.110294
TGME49_259240:324	0	9	3	3	T	TGME49_259240	324	65	80	8	31	0.0151515	0.123457	0.444444	0.125	8.14815	0.28125	14	93	19	0	T	TGME49_259240	324	376	545	100	287	0.0397878	0.172161	0.19802	0.00347222	4.32698	0.0175347
TGME49_260240:529	0	8	1	0	T	TGME49_260240	529	13	20	7	12	0.0714286	0.428571	0.25	0.0769231	6	0.307692	0	12	0	0	T	TGME49_260240	529	40	22	45	26	0.0243902	0.565217	0.0217391	0.037037	23.1739	1.7037
TGME49_260260:656	0	20	0	12	T	TGME49_260260	656	51	47	13	23	0.0192308	0.4375	0.0714286	0.541667	22.75	7.58333	7	19	0	1	T	TGME49_260260	656	261	141	13	105	0.0305344	0.140845	0.0714286	0.0188679	4.61268	0.264151
TGME49_260500:1514	0	8	0	3	T	TGME49_260500	1514	18	24	2	44	0.0526316	0.36	0.333333	0.0888889	6.84	0.266667	0	6	0	27	T	TGME49_260500	1514	26	41	4	42	0.037037	0.166667	0.2	0.651163	4.5	3.25581
TGME49_260500:231	0	6	3	13	T	TGME49_260500	231	20	28	26	51	0.0476191	0.241379	0.148148	0.269231	5.06897	1.81731	2	23	0	2	T	TGME49_260500	231	55	57	89	29	0.0535714	0.413793	0.0111111	0.1	7.72414	9
TGME49_260520:691	0	5	0	4	T	TGME49_260520	691	11	15	3	10	0.0833333	0.375	0.25	0.454545	4.5	1.81818	2	15	0	41	T	TGME49_260520	691	68	50	77	87	0.0434783	0.313725	0.0128205	0.477273	7.21569	37.2273
TGME49_260620:1420	0	5	5	1	T	TGME49_260620	1420	17	24	12	25	0.0555556	0.24	0.461539	0.0769231	4.32	0.166667	0	8	0	0	T	TGME49_260620	1420	47	19	3	31	0.0208333	0.45	0.25	0.03125	21.6	0.125
TGME49_260620:1773	0	7	3	0	T	TGME49_260620	1773	51	39	11	19	0.0192308	0.2	0.333333	0.05	10.4	0.15	0	7	0	5	T	TGME49_260620	1773	36	35	74	22	0.027027	0.222222	0.0133333	0.26087	8.22222	19.5652
TGME49_260620:1880	0	12	0	3	T	TGME49_260620	1880	63	51	28	31	0.015625	0.25	0.0344828	0.125	16	3.625	0	20	0	3	T	TGME49_260620	1880	54	72	35	23	0.0181818	0.287671	0.0277778	0.166667	15.8219	6
TGME49_260620:2010	0	6	7	0	T	TGME49_260620	2010	36	35	17	28	0.027027	0.194444	0.444444	0.0344828	7.19444	0.0775862	0	10	0	1	T	TGME49_260620	2010	33	44	11	1	0.0294118	0.244444	0.0833333	1	8.31111	12
TGME49_260620:2014	0	9	0	7	T	TGME49_260620	2014	36	47	17	34	0.027027	0.208333	0.0555556	0.228571	7.70833	4.11429	0	9	0	0	T	TGME49_260620	2014	59	66	39	25	0.0166667	0.149254	0.025	0.0384615	8.95522	1.53846
TGME49_260620:745	0	5	0	3	T	TGME49_260620	745	21	26	9	13	0.0454546	0.222222	0.1	0.285714	4.88889	2.85714	0	7	0	0	T	TGME49_260620	745	155	38	70	34	0.00641026	0.205128	0.0140845	0.0285714	32	2.02857
TGME49_260620:774	0	5	0	9	T	TGME49_260620	774	13	15	4	38	0.0714286	0.375	0.2	0.25641	5.25	1.28205	8	27	0	0	T	TGME49_260620	774	56	44	25	77	0.157895	0.622222	0.0384615	0.0128205	3.94074	0.333333
TGME49_261400:2029	0	5	0	1	T	TGME49_261400	2029	21	19	21	19	0.0454546	0.3	0.0454546	0.1	6.6	2.2	0	11	0	0	T	TGME49_261400	2029	53	40	32	1	0.0185185	0.292683	0.030303	0.5	15.8049	16.5
TGME49_261400:2173	0	6	0	10	T	TGME49_261400	2173	30	14	7	35	0.0322581	0.466667	0.125	0.305556	14.4667	2.44444	0	6	10	0	T	TGME49_261400	2173	60	39	63	13	0.0163934	0.175	0.171875	0.0714286	10.675	0.415584
TGME49_261400:2936	0	7	0	15	T	TGME49_261400	2936	18	27	6	25	0.0526316	0.285714	0.142857	0.615385	5.42857	4.30769	0	6	0	0	T	TGME49_261400	2936	45	40	6	86	0.0217391	0.170732	0.142857	0.0114943	7.85366	0.0804598
TGME49_261570:145	0	10	2	8	T	TGME49_261570	145	53	53	21	54	0.0185185	0.203704	0.136364	0.163636	11	1.2	0	63	0	0	T	TGME49_261570	145	133	205	30	123	0.00746269	0.31068	0.0322581	0.00806452	41.6311	0.25
TGME49_261570:254	0	10	1	8	T	TGME49_261570	254	84	53	27	50	0.0117647	0.203704	0.0714286	0.176471	17.3148	2.47059	19	66	0	153	T	TGME49_261570	254	559	479	350	345	0.0357143	0.139583	0.002849	0.445087	3.90833	156.225
TGME49_261570:424	0	69	3	58	T	TGME49_261570	424	35	106	28	119	0.0277778	0.654206	0.137931	0.491667	23.5514	3.56458	18	420	9	112	T	TGME49_261570	424	413	714	181	290	0.0458937	0.588811	0.0549451	0.388316	12.8299	7.06735
TGME49_261570:591	5	22	1	17	T	TGME49_261570	591	153	92	48	89	0.038961	0.247312	0.0408163	0.2	6.34767	4.9	0	66	0	24	T	TGME49_261570	591	467	472	83	260	0.00213675	0.141649	0.0119048	0.0957854	66.2918	8.04598
TGME49_261740:1095	0	53	14	70	T	TGME49_261740	1095	64	155	49	158	0.0153846	0.346154	0.3	0.446541	22.5	1.48847	28	328	0	250	T	TGME49_261740	1095	373	729	369	549	0.0775401	0.450685	0.0027027	0.456364	5.81228	168.855
TGME49_261740:1463	0	17	0	2	T	TGME49_261740	1463	78	109	45	101	0.0126582	0.163636	0.0217391	0.0294118	12.9273	1.35294	3	27	0	9	T	TGME49_261740	1463	400	214	181	95	0.00997506	0.130233	0.00549451	0.104167	13.0558	18.9583
TGME49_261740:273	0	9	0	10	T	TGME49_261740	273	69	70	12	39	0.0142857	0.140845	0.0769231	0.275	9.85915	3.575	0	38	0	46	T	TGME49_261740	273	271	322	165	273	0.00367647	0.120743	0.0060241	0.171533	32.8421	28.4745
TGME49_261740:603	0	29	0	22	T	TGME49_261740	603	258	184	80	162	0.003861	0.162162	0.0123457	0.141104	42	11.4294	2	92	9	66	T	TGME49_261740	603	247	289	155	176	0.0120968	0.32069	0.0641026	0.378531	26.5103	5.90508
TGME49_261780:1092	0	5	4	0	T	TGME49_261780	1092	84	35	7	18	0.0117647	0.166667	0.625	0.0526316	14.1667	0.0842105	4	16	0	50	T	TGME49_261780	1092	87	63	11	82	0.0568182	0.265625	0.0833333	0.614458	4.675	7.37349
TGME49_261780:377	0	6	3	0	T	TGME49_261780	377	33	38	14	14	0.0294118	0.179487	0.266667	0.0666667	6.10256	0.25	0	22	110	1	T	TGME49_261780	377	76	63	163	87	0.012987	0.359375	0.676829	0.0227273	27.6719	0.033579
TGME49_261780:875	0	5	0	0	T	TGME49_261780	875	26	38	15	15	0.037037	0.153846	0.0625	0.0625	4.15385	1	0	5	0	17	T	TGME49_261780	875	35	33	45	18	0.0277778	0.176471	0.0217391	0.947368	6.35294	43.5789
TGME49_262050:1176	0	12	0	3	T	TGME49_262050	1176	75	60	4	56	0.0131579	0.213115	0.2	0.0701754	16.1967	0.350877	0	15	0	0	T	TGME49_262050	1176	29	66	109	36	0.0333333	0.238806	0.00909091	0.027027	7.16418	2.97297
TGME49_262050:1385	0	10	0	0	T	TGME49_262050	1385	39	50	3	19	0.025	0.215686	0.25	0.05	8.62745	0.2	0	19	17	33	T	TGME49_262050	1385	89	127	65	71	0.0111111	0.15625	0.272727	0.472222	14.0625	1.73148
TGME49_262050:165	0	12	0	0	T	TGME49_262050	165	83	81	16	35	0.0119048	0.158537	0.0588235	0.0277778	13.3171	0.472222	0	10	0	0	T	TGME49_262050	165	82	61	23	60	0.0120482	0.177419	0.0416667	0.0163934	14.7258	0.393443
TGME49_262050:1918	0	15	10	1	T	TGME49_262050	1918	50	99	32	16	0.0196078	0.16	0.333333	0.117647	8.16	0.352941	1	27	0	0	T	TGME49_262050	1918	118	105	44	101	0.0168067	0.264151	0.0222222	0.00980392	15.717	0.441176
TGME49_262050:2180	0	9	4	5	T	TGME49_262050	2180	34	47	19	44	0.0285714	0.208333	0.25	0.133333	7.29167	0.533333	0	29	0	0	T	TGME49_262050	2180	45	136	126	65	0.0217391	0.218978	0.00787402	0.0151515	10.073	1.92424
TGME49_262050:2227	0	9	0	1	T	TGME49_262050	2227	36	70	15	51	0.027027	0.140845	0.0625	0.0384615	5.21127	0.615385	2	11	0	0	T	TGME49_262050	2227	84	67	16	33	0.0352941	0.176471	0.0588235	0.0294118	5	0.5
TGME49_262050:2630	0	6	6	0	T	TGME49_262050	2630	31	28	15	21	0.03125	0.241379	0.4375	0.0454546	7.72414	0.103896	0	7	0	0	T	TGME49_262050	2630	43	43	48	32	0.0227273	0.181818	0.0204082	0.030303	8	1.48485
TGME49_262050:640	0	10	0	2	T	TGME49_262050	640	48	29	7	21	0.0204082	0.366667	0.125	0.136364	17.9667	1.09091	0	7	0	5	T	TGME49_262050	640	165	64	127	130	0.0060241	0.123077	0.0078125	0.0458015	20.4308	5.8626
TGME49_262050:722	0	14	8	5	T	TGME49_262050	722	35	69	27	38	0.0277778	0.214286	0.321429	0.153846	7.71429	0.478633	0	9	22	0	T	TGME49_262050	722	75	72	89	18	0.0131579	0.136986	0.255556	0.0526316	10.411	0.20595
TGME49_262500:392	0	6	0	0	T	TGME49_262500	392	7	14	9	20	0.125	0.466667	0.1	0.0476191	3.73333	0.476191	0	7	0	0	T	TGME49_262500	392	39	58	31	60	0.025	0.135593	0.03125	0.0163934	5.42373	0.52459
TGME49_262620:1323	0	12	1	26	T	TGME49_262620	1323	86	49	33	76	0.0114942	0.26	0.0588235	0.350649	22.62	5.96104	2	15	0	50	T	TGME49_262620	1323	74	34	19	68	0.04	0.457143	0.05	0.73913	11.4286	14.7826
TGME49_262620:1575	3	27	29	17	T	TGME49_262620	1575	145	131	62	105	0.0273973	0.212121	0.476191	0.169811	7.74242	0.356604	11	29	0	20	T	TGME49_262620	1575	148	93	14	106	0.0805369	0.319149	0.0666667	0.196262	3.96277	2.94393
TGME49_262620:1867	0	8	1	0	T	TGME49_262620	1867	89	50	13	43	0.0111111	0.176471	0.142857	0.0227273	15.8824	0.159091	0	6	0	0	T	TGME49_262620	1867	48	42	9	35	0.0204082	0.162791	0.1	0.0277778	7.97674	0.277778
TGME49_262620:1941	0	15	0	12	T	TGME49_262620	1941	47	85	51	90	0.0208333	0.186047	0.0192308	0.142857	8.93023	7.42857	0	11	0	0	T	TGME49_262620	1941	130	92	8	4	0.00763359	0.129032	0.111111	0.2	16.9032	1.8
TGME49_262620:2018	0	10	3	0	T	TGME49_262620	2018	24	54	15	38	0.04	0.2	0.25	0.025641	5	0.102564	0	9	0	0	T	TGME49_262620	2018	53	39	1	26	0.0185185	0.25	0.5	0.037037	13.5	0.0740741
TGME49_262620:466	1	8	0	0	T	TGME49_262620	466	45	45	14	26	0.0434783	0.195652	0.0666667	0.037037	4.5	0.555556	0	14	0	9	T	TGME49_262620	466	71	62	46	41	0.0138889	0.238095	0.0212766	0.238095	17.1429	11.1905
TGME49_262620:483	0	9	5	9	T	TGME49_262620	483	47	65	19	36	0.0208333	0.151515	0.3	0.27027	7.27273	0.900901	0	9	15	13	T	TGME49_262620	483	115	76	65	78	0.00862069	0.12987	0.242424	0.177215	15.0649	0.731013
TGME49_262620:810	0	7	2	15	T	TGME49_262620	810	39	50	36	84	0.025	0.156863	0.0810811	0.188235	6.27451	2.32157	0	19	17	19	T	TGME49_262620	810	103	64	43	40	0.00961539	0.307692	0.409091	0.487805	32	1.19241
TGME49_262640:547	0	10	0	0	T	TGME49_262640	547	12	30	14	22	0.0769231	0.354839	0.0666667	0.0434783	4.6129	0.652174	0	6	0	4	T	TGME49_262640	547	103	42	47	36	0.00961539	0.162791	0.0208333	0.135135	16.9302	6.48649
TGME49_262640:745	0	6	0	0	T	TGME49_262640	745	12	16	5	6	0.0769231	0.411765	0.166667	0.142857	5.35294	0.857143	1	18	1	10	T	TGME49_262640	745	107	104	131	135	0.0185185	0.180952	0.0151515	0.0808824	9.77143	5.33824
TGME49_262670:1254	0	17	0	23	T	TGME49_262670	1254	44	81	15	71	0.0222222	0.219512	0.0625	0.333333	9.87805	5.33333	10	115	0	30	T	TGME49_262670	1254	667	562	151	190	0.0164671	0.206039	0.00657895	0.162304	12.5122	24.6702
TGME49_262670:1303	0	20	10	25	T	TGME49_262670	1303	133	140	38	111	0.00746269	0.148936	0.282051	0.232143	19.9575	0.823052	10	81	0	10	T	TGME49_262670	1303	729	473	290	87	0.0150685	0.172996	0.00343643	0.125	11.4806	36.375
TGME49_262670:1307	0	63	3	20	T	TGME49_262670	1307	150	191	41	144	0.00662252	0.333333	0.0952381	0.144828	50.3333	1.52069	51	210	24	15	T	TGME49_262670	1307	761	674	177	83	0.0682415	0.312593	0.140449	0.190476	4.58068	1.35619
TGME49_262670:687	0	29	0	16	T	TGME49_262670	687	19	109	23	74	0.05	0.272727	0.0416667	0.226667	5.45455	5.44	24	133	29	63	T	TGME49_262670	687	469	501	178	194	0.0531915	0.266932	0.167598	0.328205	5.01833	1.95829
TGME49_262690:503	0	42	4	25	T	TGME49_262690	503	63	136	28	115	0.015625	0.313869	0.172414	0.224138	20.0876	1.3	39	196	70	58	T	TGME49_262690	503	556	567	207	244	0.0718133	0.346831	0.341346	0.240816	4.82962	0.70549
TGME49_262690:825	0	38	12	34	T	TGME49_262690	825	142	120	73	133	0.00699301	0.322314	0.175676	0.261194	46.0909	1.4868	18	116	0	55	T	TGME49_262690	825	371	353	175	239	0.0510753	0.330508	0.00568182	0.233333	6.47101	41.0667
TGME49_262720:293	0	6	0	0	T	TGME49_262720	293	48	25	21	6	0.0204082	0.269231	0.0454546	0.142857	13.1923	3.14286	0	23	1	29	T	TGME49_262720	293	98	111	13	44	0.010101	0.214286	0.142857	0.666667	21.2143	4.66667
TGME49_262720:577	0	12	0	18	T	TGME49_262720	577	27	28	8	37	0.0357143	0.448276	0.111111	0.5	12.5517	4.5	0	23	18	7	T	TGME49_262720	577	134	109	50	23	0.00740741	0.218182	0.372549	0.333333	29.4545	0.894737
TGME49_262730:1865	0	5	0	0	T	TGME49_262730	1865	32	15	4	15	0.030303	0.375	0.2	0.0625	12.375	0.3125	0	12	0	2	T	TGME49_262730	1865	158	51	50	46	0.00628931	0.25	0.0196078	0.0638298	39.75	3.25532
TGME49_263040:763	2	22	4	19	T	TGME49_263040	763	38	81	13	84	0.0769231	0.280488	0.357143	0.235294	3.64634	0.658824	3	36	0	21	T	TGME49_263040	763	261	307	122	157	0.0152672	0.12013	0.00813008	0.139241	7.86851	17.1266
TGME49_263040:787	0	8	0	10	T	TGME49_263040	787	65	60	9	73	0.0151515	0.147541	0.1	0.148649	9.73771	1.48649	0	52	0	64	T	TGME49_263040	787	259	366	130	256	0.00384615	0.144414	0.00763359	0.252918	37.5477	33.1323
TGME49_263040:948	1	20	15	3	T	TGME49_263040	948	23	51	29	24	0.0833333	0.403846	0.533333	0.16	4.84615	0.3	15	69	0	12	T	TGME49_263040	948	316	342	225	185	0.0504732	0.204082	0.00442478	0.0698925	4.04337	15.7957
TGME49_263050:1186	0	56	6	30	T	TGME49_263050	1186	254	170	76	155	0.00392157	0.333333	0.0909091	0.198718	85	2.1859	25	102	1	83	T	TGME49_263050	1186	447	324	152	229	0.0580357	0.316923	0.0130719	0.365217	5.46083	27.9391
TGME49_263050:1274	0	9	0	0	T	TGME49_263050	1274	92	81	32	61	0.0107527	0.121951	0.030303	0.016129	11.3415	0.532258	0	51	0	56	T	TGME49_263050	1274	461	403	155	211	0.0021645	0.128713	0.00641026	0.268868	59.4653	41.9434
TGME49_263050:397	0	11	3	8	T	TGME49_263050	397	90	90	45	92	0.010989	0.131868	0.0869565	0.0967742	12	1.1129	0	80	0	28	T	TGME49_263050	397	403	286	124	130	0.00247525	0.28223	0.008	0.221374	114.021	27.6718
TGME49_263050:410	0	17	2	42	T	TGME49_263050	410	72	98	52	123	0.0136986	0.181818	0.0566038	0.346774	13.2727	6.12634	10	156	4	29	T	TGME49_263050	410	692	647	241	232	0.015873	0.242284	0.0206612	0.128755	15.2639	6.23176
TGME49_263050:572	0	25	0	4	T	TGME49_263050	572	40	60	40	76	0.0243902	0.426229	0.0243902	0.0649351	17.4754	2.66234	13	139	0	93	T	TGME49_263050	572	671	552	127	291	0.0208333	0.253165	0.0078125	0.321918	12.1519	41.2055
TGME49_263090:1343	0	16	0	8	T	TGME49_263090	1343	200	83	37	111	0.00497512	0.202381	0.0263158	0.0803571	40.6786	3.05357	5	62	31	1	T	TGME49_263090	1343	292	289	99	117	0.0204778	0.217241	0.32	0.0169492	10.6086	0.0529661
TGME49_263090:1662	0	5	0	2	T	TGME49_263090	1662	44	42	6	19	0.0222222	0.139535	0.142857	0.15	6.27907	1.05	0	27	0	0	T	TGME49_263090	1662	19	56	22	17	0.05	0.491228	0.0434783	0.0555556	9.82456	1.27778
TGME49_263090:242	7	30	7	56	T	TGME49_263090	242	137	125	22	100	0.057971	0.246032	0.347826	0.564356	4.24405	1.62252	15	32	0	44	T	TGME49_263090	242	312	172	57	185	0.0511182	0.190751	0.0172414	0.241935	3.73158	14.0323
TGME49_263090:293	0	61	3	40	T	TGME49_263090	293	129	206	58	167	0.00769231	0.299517	0.0677966	0.244048	38.9372	3.5997	48	147	25	143	T	TGME49_263090	293	498	366	392	427	0.0981964	0.40327	0.0661578	0.336449	4.10677	5.08555
TGME49_263090:642	10	33	0	18	T	TGME49_263090	642	151	121	58	120	0.0723684	0.278689	0.0169491	0.157025	3.85097	9.26446	14	47	3	47	T	TGME49_263090	642	232	174	55	88	0.0643777	0.274286	0.0714286	0.539326	4.26057	7.55056
TGME49_263300:159	0	5	0	0	T	TGME49_263300	159	18	8	7	16	0.0526316	0.666667	0.125	0.0588235	12.6667	0.470588	0	8	0	41	T	TGME49_263300	159	16	15	17	41	0.0588235	0.5625	0.0555556	1	9.5625	18
TGME49_263300:421	0	6	1	0	T	TGME49_263300	421	28	20	5	25	0.0344828	0.333333	0.333333	0.0384615	9.66667	0.115385	0	5	0	5	T	TGME49_263300	421	21	22	1	7	0.0454545	0.26087	0.5	0.75	5.73913	1.5
TGME49_263300:427	0	8	1	16	T	TGME49_263300	427	29	25	4	39	0.0333333	0.346154	0.4	0.425	10.3846	1.0625	0	12	0	6	T	TGME49_263300	427	36	29	1	13	0.027027	0.433333	0.5	0.5	16.0333	1
TGME49_263300:859	0	6	0	2	T	TGME49_263300	859	23	15	11	5	0.0416667	0.4375	0.0833333	0.5	10.5	6	0	21	0	82	T	TGME49_263300	859	42	45	33	114	0.0232558	0.478261	0.0294118	0.721739	20.5652	24.5391
TGME49_263320:1294	0	7	1	1	T	TGME49_263320	1294	34	36	5	32	0.0285714	0.216216	0.333333	0.0606061	7.56757	0.181818	0	8	0	0	T	TGME49_263320	1294	21	44	7	34	0.0454545	0.2	0.125	0.0285714	4.4	0.228571
TGME49_263320:1613	0	9	0	1	T	TGME49_263320	1613	37	34	2	31	0.0263158	0.285714	0.333333	0.0625	10.8571	0.1875	0	10	0	0	T	TGME49_263320	1613	51	34	35	46	0.0192308	0.314286	0.0277778	0.0212766	16.3429	0.765957
TGME49_263320:1673	0	7	2	2	T	TGME49_263320	1673	25	14	9	10	0.0384615	0.533333	0.3	0.272727	13.8667	0.909091	0	22	0	0	T	TGME49_263320	1673	34	78	50	1	0.0285714	0.291139	0.0196078	0.5	10.1899	25.5
TGME49_263700:767	0	31	4	15	T	TGME49_263700	767	43	83	21	85	0.0227273	0.380952	0.227273	0.186047	16.7619	0.818605	0	124	15	140	T	TGME49_263700	767	878	574	424	462	0.00113766	0.217391	0.0376471	0.304536	191.087	8.08923
TGME49_265790:1413	0	5	0	1	T	TGME49_265790	1413	60	27	18	22	0.0163934	0.214286	0.0526316	0.0869565	13.0714	1.65217	0	11	0	3	T	TGME49_265790	1413	43	74	78	120	0.0227273	0.16	0.0126582	0.0330579	7.04	2.61157
TGME49_265790:1607	0	5	6	0	T	TGME49_265790	1607	32	22	15	38	0.030303	0.26087	0.4375	0.025641	8.6087	0.0586081	0	15	0	0	T	TGME49_265790	1607	176	105	44	170	0.00564972	0.150943	0.0222222	0.00584795	26.717	0.263158
TGME49_265790:2483	0	5	0	0	T	TGME49_265790	2483	33	23	11	47	0.0294118	0.25	0.0833333	0.0208333	8.5	0.25	0	15	0	0	T	TGME49_265790	2483	73	71	17	49	0.0135135	0.222222	0.0555556	0.02	16.4444	0.36
TGME49_265790:3041	0	6	0	2	T	TGME49_265790	3041	28	37	17	21	0.0344828	0.18421	0.0555556	0.136364	5.34211	2.45454	0	25	47	6	T	TGME49_265790	3041	71	129	114	88	0.0138889	0.2	0.417391	0.0786517	14.4	0.188436
TGME49_265790:465	0	10	0	20	T	TGME49_265790	465	18	28	6	26	0.0526316	0.37931	0.142857	0.777778	7.2069	5.44444	4	44	0	0	T	TGME49_265790	465	151	91	75	78	0.0328947	0.48913	0.0131579	0.0126582	14.8696	0.962025
TGME49_266060:1143	0	14	2	8	T	TGME49_266060	1143	24	51	28	48	0.04	0.288461	0.103448	0.183673	7.21154	1.77551	0	59	0	93	T	TGME49_266060	1143	195	256	73	307	0.00510204	0.233463	0.0135135	0.305195	45.7588	22.5844
TGME49_266060:345	0	23	0	11	T	TGME49_266060	345	165	109	42	76	0.0060241	0.218182	0.0232558	0.155844	36.2182	6.7013	0	57	0	0	T	TGME49_266060	345	265	269	99	49	0.0037594	0.214815	0.01	0.02	57.1407	2
TGME49_266060:477	0	8	0	23	T	TGME49_266060	477	94	65	34	112	0.0105263	0.136364	0.0285714	0.212389	12.9545	7.43363	9	69	27	0	T	TGME49_266060	477	589	427	309	191	0.0169492	0.163551	0.0903226	0.00520833	9.64953	0.0576637
TGME49_266070:449	0	36	0	4	T	TGME49_266070	449	64	223	85	203	0.0153846	0.165179	0.0116279	0.0245098	10.7366	2.10784	34	318	1	139	T	TGME49_266070	449	422	703	234	370	0.0827423	0.453125	0.00851064	0.377358	5.47634	44.3396
TGME49_266070:669	0	30	5	15	T	TGME49_266070	669	54	101	64	124	0.0181818	0.303922	0.0923077	0.128	16.7157	1.38667	15	162	0	78	T	TGME49_266070	669	626	1020	243	535	0.0255183	0.159647	0.00409836	0.147388	6.25618	35.9627
TGME49_266080:2129	0	8	11	0	T	TGME49_266080	2129	49	50	47	47	0.02	0.176471	0.25	0.0208333	8.82353	0.0833333	1	30	0	0	T	TGME49_266080	2129	196	212	74	113	0.0101523	0.14554	0.0133333	0.00877193	14.3357	0.657895
TGME49_266080:2894	0	22	0	8	T	TGME49_266080	2894	38	72	17	57	0.025641	0.315068	0.0555556	0.155172	12.2877	2.7931	0	16	0	15	T	TGME49_266080	2894	162	137	43	72	0.00613497	0.123188	0.0227273	0.219178	20.0797	9.64384
TGME49_266080:374	0	9	0	5	T	TGME49_266080	374	30	49	7	60	0.0322581	0.2	0.125	0.0983607	6.2	0.786885	0	19	0	10	T	TGME49_266080	374	148	116	175	53	0.00671141	0.17094	0.00568182	0.203704	25.4701	35.8519
TGME49_266080:449	1	9	0	9	T	TGME49_266080	449	44	49	23	54	0.0444444	0.2	0.0416667	0.181818	4.5	4.36364	0	28	3	31	T	TGME49_266080	449	157	164	81	111	0.00632911	0.175758	0.0487805	0.285714	27.7697	5.85714
TGME49_266080:998	0	15	0	7	T	TGME49_266080	998	36	55	10	46	0.027027	0.285714	0.0909091	0.170213	10.5714	1.87234	0	16	0	13	T	TGME49_266080	998	86	110	30	128	0.0114943	0.153153	0.0322581	0.108527	13.3243	3.36434
TGME49_266100:1088	0	7	0	8	T	TGME49_266100	1088	9	20	4	29	0.1	0.380952	0.2	0.3	3.80952	1.5	0	5	0	26	T	TGME49_266100	1088	19	8	11	26	0.05	0.666667	0.0833333	1	13.3333	12
TGME49_266120:901	0	7	0	0	T	TGME49_266120	901	19	19	13	14	0.05	0.4	0.0714286	0.0666667	8	0.933333	0	8	0	0	T	TGME49_266120	901	18	10	1	27	0.0526316	0.818182	0.5	0.0357143	15.5455	0.0714286
TGME49_266366:4054	0	5	0	0	T	TGME49_266366	4054	13	6	4	5	0.0714286	0.857143	0.2	0.166667	12	0.833333	0	5	0	0	T	TGME49_266366	4054	44	20	22	17	0.0222222	0.285714	0.0434783	0.0555556	12.8571	1.27778
TGME49_266460:120	0	5	4	3	T	TGME49_266460	120	22	29	24	21	0.0434783	0.2	0.2	0.181818	4.6	0.909091	14	36	0	41	T	TGME49_266460	120	132	73	29	101	0.112782	0.5	0.0333333	0.411765	4.43333	12.3529
TGME49_266640:982	0	5	2	0	T	TGME49_266640	982	28	31	15	23	0.0344828	0.1875	0.1875	0.0416667	5.4375	0.222222	0	5	0	0	T	TGME49_266640	982	68	16	13	57	0.0144928	0.352941	0.0714286	0.0172414	24.3529	0.241379
TGME49_266910:565	0	14	0	3	T	TGME49_266910	565	15	31	1	7	0.0625	0.46875	0.5	0.5	7.5	1	0	15	0	0	T	TGME49_266910	565	13	48	13	2	0.0714286	0.326531	0.0714286	0.333333	4.57143	4.66667
TGME49_266920:2376	0	19	0	26	T	TGME49_266920	2376	16	49	16	63	0.0588235	0.4	0.0588235	0.421875	6.8	7.17188	0	14	0	0	T	TGME49_266920	2376	27	51	31	37	0.0357143	0.288462	0.03125	0.0263158	8.07692	0.842105
TGME49_266920:3255	0	10	6	8	T	TGME49_266920	3255	20	61	43	25	0.0476191	0.177419	0.159091	0.346154	3.72581	2.17582	2	5	29	4	T	TGME49_266920	3255	52	24	52	4	0.0566038	0.24	0.566038	1	4.24	1.76667
TGME49_266920:3276	0	11	3	17	T	TGME49_266920	3276	32	92	30	65	0.030303	0.129032	0.129032	0.272727	4.25807	2.11364	0	5	0	0	T	TGME49_266920	3276	89	45	29	32	0.0111111	0.130435	0.0333333	0.030303	11.7391	0.909091
TGME49_266960:2153	0	10	0	4	T	TGME49_266960	2153	20	24	12	21	0.0476191	0.44	0.0769231	0.227273	9.24	2.95454	0	16	0	0	T	TGME49_266960	2153	39	60	21	28	0.025	0.278689	0.0454545	0.0344828	11.1475	0.758621
TGME49_266960:2287	0	9	0	1	T	TGME49_266960	2287	48	43	28	75	0.0204082	0.227273	0.0344828	0.0263158	11.1364	0.763158	7	56	22	65	T	TGME49_266960	2287	384	369	173	298	0.0207792	0.154054	0.132184	0.220736	7.41385	1.66991
TGME49_266960:2820	0	9	1	12	T	TGME49_266960	2820	22	35	25	48	0.0434783	0.277778	0.0769231	0.265306	6.38889	3.44898	0	41	36	5	T	TGME49_266960	2820	221	321	176	335	0.0045045	0.130435	0.20904	0.0178571	28.9565	0.0854247
TGME49_266960:3200	0	14	4	5	T	TGME49_266960	3200	122	88	61	125	0.00813008	0.168539	0.0806452	0.0476191	20.7303	0.590476	3	12	0	0	T	TGME49_266960	3200	61	42	33	13	0.0645161	0.302326	0.0294118	0.0714286	4.68605	2.42857
TGME49_266960:3623	0	7	0	11	T	TGME49_266960	3623	90	65	39	108	0.010989	0.121212	0.025	0.110092	11.0303	4.40367	0	25	0	0	T	TGME49_266960	3623	120	131	98	56	0.00826446	0.19697	0.010101	0.0175439	23.8333	1.73684
TGME49_267060:720	0	10	0	8	T	TGME49_267060	720	55	70	39	82	0.0178571	0.15493	0.025	0.108434	8.67606	4.33735	19	135	32	48	T	TGME49_267060	720	298	440	126	241	0.0668896	0.30839	0.259843	0.202479	4.61043	0.779239
TGME49_267060:747	0	53	12	49	T	TGME49_267060	747	116	103	93	93	0.00854701	0.519231	0.138298	0.531915	60.75	3.84615	13	100	0	5	T	TGME49_267060	747	386	523	193	184	0.0361757	0.192748	0.00515464	0.0324324	5.32811	6.29189
TGME49_267400:300	0	85	8	135	T	TGME49_267400	300	34	133	27	193	0.0285714	0.641791	0.321429	0.701031	22.4627	2.18099	2	116	0	0	T	TGME49_267400	300	118	438	87	119	0.0252101	0.266515	0.0113636	0.00833333	10.5718	0.733333
TGME49_267400:338	7	61	3	49	T	TGME49_267400	338	83	164	50	136	0.0952381	0.375758	0.0784314	0.364963	3.94545	4.65329	5	54	0	58	T	TGME49_267400	338	324	323	80	154	0.0184615	0.169753	0.0123457	0.380645	9.19496	30.8323
TGME49_267400:522	0	55	8	35	T	TGME49_267400	522	172	234	109	202	0.00578035	0.238298	0.0818182	0.17734	41.2255	2.16749	19	126	0	76	T	TGME49_267400	522	328	370	113	284	0.0607903	0.342318	0.00877193	0.270175	5.63113	30.8
TGME49_267400:659	2	67	1	90	T	TGME49_267400	659	72	124	71	158	0.0410959	0.544	0.0277778	0.572327	13.2373	20.6038	0	22	0	29	T	TGME49_267400	659	139	134	22	155	0.00714286	0.17037	0.0434783	0.192308	23.8519	4.42308
TGME49_267500:560	0	5	0	0	T	TGME49_267500	560	17	27	10	7	0.0555556	0.214286	0.0909091	0.125	3.85714	1.375	0	16	0	2	T	TGME49_267500	560	41	44	41	12	0.0238095	0.377778	0.0238095	0.230769	15.8667	9.69231
TGME49_268200:313	0	6	0	1	T	TGME49_268200	313	33	15	10	14	0.0294118	0.4375	0.0909091	0.133333	14.875	1.46667	0	13	0	0	T	TGME49_268200	313	57	80	41	57	0.0172414	0.17284	0.0238095	0.0172414	10.0247	0.724138
TGME49_268790:1121	1	7	5	1	T	TGME49_268790	1121	38	22	16	20	0.0512821	0.347826	0.352941	0.0952381	6.78261	0.269841	0	8	21	0	T	TGME49_268790	1121	51	64	22	32	0.0192308	0.138462	0.956522	0.030303	7.2	0.0316804
TGME49_268790:1469	0	6	0	0	T	TGME49_268790	1469	63	42	7	30	0.015625	0.162791	0.125	0.0322581	10.4186	0.258064	0	9	1	0	T	TGME49_268790	1469	72	46	18	4	0.0136986	0.212766	0.105263	0.2	15.5319	1.9
TGME49_268790:1598	0	9	0	0	T	TGME49_268790	1598	88	31	17	8	0.011236	0.3125	0.0555556	0.111111	27.8125	2	0	13	0	28	T	TGME49_268790	1598	43	33	64	29	0.0227273	0.411765	0.0153846	0.966667	18.1176	62.8333
TGME49_268790:1695	2	7	7	7	T	TGME49_268790	1695	69	33	11	35	0.0428571	0.235294	0.666667	0.222222	5.4902	0.333333	2	20	20	22	T	TGME49_268790	1695	33	41	38	70	0.0882353	0.5	0.538462	0.323944	5.66667	0.60161
TGME49_268790:1981	0	8	14	11	T	TGME49_268790	1981	27	32	20	33	0.0357143	0.272727	0.714286	0.352941	7.63636	0.494118	0	8	0	39	T	TGME49_268790	1981	39	47	87	80	0.025	0.1875	0.0113636	0.493827	7.5	43.4568
TGME49_268830:1264	0	9	0	9	T	TGME49_268830	1264	19	19	3	17	0.05	0.5	0.25	0.555556	10	2.22222	0	8	0	0	T	TGME49_268830	1264	70	34	47	7	0.0140845	0.257143	0.0208333	0.125	18.2571	6
TGME49_268830:1476	0	5	0	8	T	TGME49_268830	1476	18	15	1	9	0.0526316	0.375	0.5	0.9	7.125	1.8	0	9	0	0	T	TGME49_268830	1476	65	23	47	18	0.0151515	0.416667	0.0208333	0.0526316	27.5	2.52632
TGME49_268850:1402	0	6	0	9	T	TGME49_268850	1402	25	26	10	19	0.0384615	0.259259	0.0909091	0.5	6.74074	5.5	8	30	7	7	T	TGME49_268850	1402	318	183	179	230	0.0282132	0.168478	0.0444444	0.034632	5.97162	0.779221
TGME49_268850:302	0	7	0	0	T	TGME49_268850	302	10	20	11	6	0.0909091	0.380952	0.0833333	0.142857	4.19048	1.71429	0	12	0	17	T	TGME49_268850	302	79	91	46	38	0.0125	0.141304	0.0212766	0.461538	11.3043	21.6923
TGME49_268850:653	0	5	3	0	T	TGME49_268850	653	33	24	6	17	0.0294118	0.24	0.571429	0.0555556	8.16	0.0972222	4	33	50	33	T	TGME49_268850	653	267	142	96	125	0.0186567	0.237762	0.525773	0.269841	12.7441	0.513228
TGME49_268980:1542	0	6	8	1	T	TGME49_268980	1542	26	28	21	24	0.037037	0.241379	0.409091	0.08	6.51724	0.195556	0	9	0	0	T	TGME49_268980	1542	65	57	88	34	0.0151515	0.172414	0.011236	0.0285714	11.3793	2.54286
TGME49_268980:529	1	11	2	22	T	TGME49_268980	529	52	54	9	74	0.0377359	0.218182	0.3	0.306667	5.78182	1.02222	0	60	0	41	T	TGME49_268980	529	69	129	33	98	0.0142857	0.469231	0.0294118	0.424242	32.8462	14.4242
TGME49_268980:592	0	7	10	10	T	TGME49_268980	592	34	46	28	67	0.0285714	0.170213	0.37931	0.161765	5.95745	0.426471	0	12	0	0	T	TGME49_268980	592	35	44	1	44	0.0277778	0.288889	0.5	0.0222222	10.4	0.0444444
TGME49_268980:658	0	6	0	1	T	TGME49_268980	658	22	27	5	16	0.0434783	0.25	0.166667	0.117647	5.75	0.705882	0	6	0	0	T	TGME49_268980	658	50	43	32	2	0.0196078	0.159091	0.030303	0.333333	8.11364	11
TGME49_268980:912	0	7	0	0	T	TGME49_268980	912	25	31	9	7	0.0384615	0.25	0.1	0.125	6.5	1.25	0	5	0	0	T	TGME49_268980	912	67	40	24	42	0.0147059	0.146341	0.04	0.0232558	9.95122	0.581395
TGME49_268980:924	0	9	0	0	T	TGME49_268980	924	33	48	23	18	0.0294118	0.204082	0.0416667	0.0526316	6.93878	1.26316	0	23	0	0	T	TGME49_268980	924	72	52	1	22	0.0136986	0.45283	0.5	0.0434783	33.0566	0.0869565
TGME49_269010:1075	0	5	0	3	T	TGME49_269010	1075	46	14	2	22	0.0212766	0.4	0.333333	0.173913	18.8	0.521739	0	7	1	51	T	TGME49_269010	1075	58	57	64	55	0.0169492	0.137931	0.0307692	0.928571	8.13793	30.1786
TGME49_269010:3725	0	10	0	0	T	TGME49_269010	3725	16	37	4	28	0.0588235	0.289474	0.2	0.0344828	4.92105	0.172414	1	6	0	0	T	TGME49_269010	3725	65	33	72	31	0.030303	0.205882	0.0136986	0.03125	6.79412	2.28125
TGME49_269010:3989	0	5	0	0	T	TGME49_269010	3989	99	37	28	23	0.01	0.157895	0.0344828	0.0416667	15.7895	1.20833	2	11	21	0	T	TGME49_269010	3989	84	69	93	63	0.0352941	0.171429	0.234043	0.015625	4.85714	0.0667614
TGME49_269010:697	0	6	0	2	T	TGME49_269010	697	29	27	18	28	0.0333333	0.25	0.0526316	0.103448	7.5	1.96552	0	23	0	0	T	TGME49_269010	697	109	55	39	63	0.00909091	0.428571	0.025	0.015625	47.1429	0.625
TGME49_269690:144	0	11	0	19	T	TGME49_269690	144	40	21	10	45	0.0243902	0.545454	0.0909091	0.434783	22.3636	4.78261	0	29	0	29	T	TGME49_269690	144	88	95	7	65	0.011236	0.3125	0.125	0.454545	27.8125	3.63636
TGME49_269690:149	0	9	2	2	T	TGME49_269690	149	36	27	6	49	0.027027	0.357143	0.428571	0.06	13.2143	0.14	0	16	1	16	T	TGME49_269690	149	42	64	1	57	0.0232558	0.261538	1	0.293103	11.2462	0.293103
TGME49_269690:1905	0	5	0	5	T	TGME49_269690	1905	41	15	3	21	0.0238095	0.375	0.25	0.272727	15.75	1.09091	0	15	0	1	T	TGME49_269690	1905	40	65	20	71	0.0243902	0.242424	0.047619	0.0277778	9.93939	0.583333
TGME49_269690:2582	0	5	0	0	T	TGME49_269690	2582	80	17	3	24	0.0123457	0.333333	0.25	0.04	27	0.16	0	22	0	21	T	TGME49_269690	2582	26	63	1	106	0.037037	0.359375	0.5	0.205607	9.70312	0.411215
TGME49_269950:4410	0	5	0	0	T	TGME49_269950	4410	50	32	6	16	0.0196078	0.181818	0.142857	0.0588235	9.27273	0.411765	0	22	0	0	T	TGME49_269950	4410	82	56	41	10	0.0120482	0.403509	0.0238095	0.0909091	33.4912	3.81818
TGME49_269950:572	0	6	0	4	T	TGME49_269950	572	21	22	10	6	0.0454546	0.304348	0.0909091	0.714286	6.69565	7.85714	0	6	0	0	T	TGME49_269950	572	75	23	32	5	0.0131579	0.291667	0.030303	0.166667	22.1667	5.5
TGME49_269970:237	0	6	0	1	T	TGME49_269970	237	28	20	21	20	0.0344828	0.333333	0.0454546	0.0952381	9.66667	2.09524	3	24	34	28	T	TGME49_269970	237	40	65	94	31	0.097561	0.378788	0.368421	0.90625	3.88258	2.45982
TGME49_269980:1232	0	5	0	0	T	TGME49_269980	1232	47	19	10	18	0.0208333	0.3	0.0909091	0.0526316	14.4	0.578947	0	7	0	0	T	TGME49_269980	1232	63	20	22	21	0.015625	0.380952	0.0434783	0.0454545	24.381	1.04545
TGME49_270240:1537	0	6	0	8	T	TGME49_270240	1537	20	31	4	26	0.0476191	0.21875	0.2	0.333333	4.59375	1.66667	0	16	0	18	T	TGME49_270240	1537	89	136	24	18	0.0111111	0.124088	0.04	1	11.1679	25
TGME49_270240:172	0	11	0	3	T	TGME49_270240	172	15	48	7	18	0.0625	0.244898	0.125	0.210526	3.91837	1.68421	2	31	9	17	T	TGME49_270240	172	34	91	36	46	0.0857143	0.347826	0.27027	0.382979	4.05797	1.41702
TGME49_270240:1827	0	23	10	12	T	TGME49_270240	1827	82	106	12	47	0.0120482	0.224299	0.846154	0.270833	18.6168	0.320076	0	11	0	10	T	TGME49_270240	1827	90	98	40	72	0.010989	0.121212	0.0243902	0.150685	11.0303	6.17808
TGME49_270240:2005	0	16	12	14	T	TGME49_270240	2005	18	48	40	36	0.0526316	0.346939	0.317073	0.405405	6.59184	1.27859	0	15	0	0	T	TGME49_270240	2005	147	112	31	5	0.00675676	0.141593	0.03125	0.166667	20.9558	5.33333
TGME49_270240:332	0	13	0	10	T	TGME49_270240	332	74	52	25	69	0.0133333	0.264151	0.0384615	0.157143	19.8113	4.08571	4	39	0	19	T	TGME49_270240	332	156	98	23	109	0.0318471	0.40404	0.0416667	0.181818	12.6869	4.36364
TGME49_270240:832	0	14	0	0	T	TGME49_270240	832	34	63	20	18	0.0285714	0.234375	0.0476191	0.0526316	8.20312	1.10526	0	21	0	17	T	TGME49_270240	832	182	155	146	36	0.00546448	0.141026	0.00680272	0.486486	25.8077	71.5135
TGME49_270240:995	0	5	0	0	T	TGME49_270240	995	89	40	20	40	0.0111111	0.146342	0.0476191	0.0243902	13.1707	0.512195	0	10	0	0	T	TGME49_270240	995	44	51	71	6	0.0222222	0.211538	0.0138889	0.142857	9.51923	10.2857
TGME49_270250:1055	48	502	57	567	T	TGME49_270250	1055	1179	2028	743	2064	0.0415254	0.247905	0.077957	0.27506	5.96997	3.52836	228	1393	34	665	T	TGME49_270250	1055	4776	5130	1187	3285	0.047938	0.271682	0.0294613	0.202678	5.66736	6.87947
TGME49_270250:1135	42	271	18	120	T	TGME49_270250	1135	1296	1889	989	2005	0.0331534	0.143915	0.0191919	0.060319	4.34089	3.14294	244	357	74	402	T	TGME49_270250	1135	4133	1665	1455	1631	0.0592646	0.214886	0.051511	0.246936	3.62587	4.79386
TGME49_270250:309	123	987	76	723	T	TGME49_270250	309	1361	2730	736	2119	0.0910426	0.361772	0.104478	0.341509	3.97366	3.26873	210	639	36	357	T	TGME49_270250	309	3185	1827	1002	1191	0.0662272	0.350109	0.0368893	0.300336	5.28649	8.14153
TGME49_270250:366	36	271	40	235	T	TGME49_270250	366	1545	1752	889	2066	0.0239327	0.155163	0.0460674	0.114175	6.48328	2.47844	310	642	117	328	T	TGME49_270250	366	5086	2206	2081	1434	0.0611362	0.291346	0.0566763	0.229268	4.76552	4.04523
TGME49_270250:379	40	386	23	291	T	TGME49_270250	379	665	1586	495	1601	0.0615616	0.243856	0.0483871	0.182272	3.96118	3.76696	184	747	138	497	T	TGME49_270250	379	3765	3561	1906	1976	0.0491237	0.209994	0.0728894	0.251897	4.2748	3.45588
TGME49_270320:1414	0	10	1	15	T	TGME49_270320	1414	15	36	24	51	0.0625	0.297297	0.08	0.307692	4.75676	3.84615	0	13	0	0	T	TGME49_270320	1414	70	66	8	31	0.0140845	0.208955	0.111111	0.03125	14.8358	0.28125
TGME49_270320:187	0	5	0	1	T	TGME49_270320	187	88	34	6	37	0.011236	0.171429	0.142857	0.0526316	15.2571	0.368421	0	8	40	0	T	TGME49_270320	187	55	62	42	78	0.0178571	0.142857	0.953488	0.0126582	8	0.0132757
TGME49_270320:245	0	6	0	26	T	TGME49_270320	245	23	39	24	53	0.0416667	0.175	0.04	0.5	4.2	12.5	0	14	0	47	T	TGME49_270320	245	117	108	51	122	0.00847458	0.137615	0.0192308	0.390244	16.2385	20.2927
TGME49_270320:39	0	11	0	8	T	TGME49_270320	39	37	30	2	24	0.0263158	0.387097	0.333333	0.36	14.7097	1.08	0	6	0	24	T	TGME49_270320	39	65	39	17	51	0.0151515	0.175	0.0555556	0.480769	11.55	8.65385
TGME49_270320:48	0	5	0	0	T	TGME49_270320	48	50	37	4	24	0.0196078	0.157895	0.2	0.04	8.05263	0.2	0	7	30	0	T	TGME49_270320	48	69	60	47	51	0.0142857	0.131148	0.645833	0.0192308	9.18033	0.0297767
TGME49_270360:1095	0	5	0	1	T	TGME49_270360	1095	19	10	8	10	0.05	0.545454	0.111111	0.181818	10.9091	1.63636	0	6	0	0	T	TGME49_270360	1095	31	13	36	10	0.03125	0.5	0.027027	0.0909091	16	3.36364
TGME49_270380:542	0	22	0	26	T	TGME49_270380	542	144	163	66	124	0.00689655	0.140244	0.0149254	0.216	20.3354	14.472	12	92	18	18	T	TGME49_270380	542	715	619	186	342	0.0181564	0.15	0.101604	0.0553936	8.26154	0.54519
TGME49_271050:1432	7	100	16	52	T	TGME49_271050	1432	470	572	247	388	0.0169851	0.176265	0.0685484	0.136247	10.3776	1.9876	75	370	56	136	T	TGME49_271050	1432	1577	1666	624	935	0.0481622	0.222555	0.0912	0.146368	4.62095	1.60491
TGME49_271050:1511	0	39	10	29	T	TGME49_271050	1511	199	229	65	218	0.005	0.173913	0.166667	0.136986	34.7826	0.821918	15	92	37	152	T	TGME49_271050	1511	471	703	167	640	0.0338983	0.132102	0.22619	0.23869	3.89702	1.05526
TGME49_271050:337	19	177	6	135	T	TGME49_271050	337	253	389	141	352	0.0787402	0.45641	0.0492958	0.385269	5.79641	7.81546	60	340	44	291	T	TGME49_271050	337	1801	982	612	653	0.0338513	0.346897	0.0734095	0.446483	10.2477	6.08209
TGME49_271050:367	0	127	9	72	T	TGME49_271050	367	258	713	175	571	0.003861	0.179272	0.0568182	0.127622	46.4314	2.24615	73	324	25	79	T	TGME49_271050	367	1997	1892	886	1221	0.037037	0.171685	0.0293123	0.0654664	4.6355	2.23341
TGME49_271050:413	0	122	15	93	T	TGME49_271050	413	195	372	204	411	0.00510204	0.329759	0.0780488	0.228155	64.6327	2.92324	119	365	96	275	T	TGME49_271050	413	1530	1182	961	883	0.0783801	0.309383	0.100832	0.312217	3.94721	3.09642
TGME49_271930:987	0	5	0	5	T	TGME49_271930	987	34	23	6	39	0.0285714	0.25	0.142857	0.15	8.75	1.05	0	12	0	0	T	TGME49_271930	987	21	33	20	14	0.0454545	0.382353	0.047619	0.0666667	8.41176	1.4
TGME49_273090:199	0	5	1	3	T	TGME49_273090	199	17	26	25	9	0.0555556	0.222222	0.0769231	0.4	4	5.2	0	15	0	0	T	TGME49_273090	199	122	56	46	45	0.00813008	0.280702	0.0212766	0.0217391	34.5263	1.02174
TGME49_273090:2387	0	5	0	7	T	TGME49_273090	2387	18	16	26	43	0.0526316	0.352941	0.037037	0.181818	6.70588	4.90909	0	17	0	0	T	TGME49_273090	2387	33	63	5	25	0.0294118	0.28125	0.166667	0.0384615	9.5625	0.230769
TGME49_273460:1696	0	9	0	9	T	TGME49_273460	1696	21	18	2	16	0.0454546	0.526316	0.333333	0.588235	11.579	1.76471	0	7	0	25	T	TGME49_273460	1696	49	41	33	26	0.02	0.190476	0.0294118	0.962963	9.52381	32.7407
TGME49_273460:1741	0	5	0	2	T	TGME49_273460	1741	10	17	6	11	0.0909091	0.333333	0.142857	0.25	3.66667	1.75	0	6	0	22	T	TGME49_273460	1741	20	28	34	33	0.047619	0.241379	0.0285714	0.676471	5.06897	23.6765
TGME49_273760:1644	0	10	1	4	T	TGME49_273760	1644	36	87	37	67	0.027027	0.125	0.0526316	0.0735294	4.625	1.39706	15	61	0	94	T	TGME49_273760	1644	443	314	287	405	0.036036	0.196825	0.00347222	0.23399	5.4619	67.3892
TGME49_273760:2478	0	9	0	10	T	TGME49_273760	2478	82	41	7	27	0.0120482	0.238095	0.125	0.392857	19.7619	3.14286	0	10	0	0	T	TGME49_273760	2478	98	86	31	125	0.010101	0.126437	0.03125	0.00793651	12.5172	0.253968
TGME49_273760:2533	0	20	0	1	T	TGME49_273760	2533	133	141	48	83	0.00746269	0.147887	0.0204082	0.0238095	19.8169	1.16667	0	16	0	9	T	TGME49_273760	2533	167	136	48	199	0.00595238	0.124088	0.0204082	0.05	20.8467	2.45
TGME49_273760:2741	4	14	0	0	T	TGME49_273760	2741	51	40	12	23	0.0961538	0.365854	0.0769231	0.0416667	3.80488	0.541667	0	9	0	0	T	TGME49_273760	2741	64	48	5	18	0.0153846	0.204082	0.166667	0.0526316	13.2653	0.315789
TGME49_273760:692	0	62	6	34	T	TGME49_273760	692	103	148	68	150	0.00961539	0.422819	0.101449	0.231788	43.9731	2.28477	47	227	56	220	T	TGME49_273760	692	829	814	822	903	0.0578313	0.279755	0.0692588	0.244469	4.83742	3.52979
TGME49_273770:1203	0	15	4	7	T	TGME49_273770	1203	15	41	9	27	0.0625	0.380952	0.5	0.285714	6.09524	0.571429	0	9	0	0	T	TGME49_273770	1203	54	46	2	20	0.0181818	0.212766	0.333333	0.047619	11.7021	0.142857
TGME49_273770:1376	0	5	0	9	T	TGME49_273770	1376	21	28	22	12	0.0454546	0.206897	0.0434783	0.769231	4.55172	17.6923	0	5	0	0	T	TGME49_273770	1376	27	39	26	15	0.0357143	0.15	0.037037	0.0625	4.2	1.6875
TGME49_273770:906	0	5	0	0	T	TGME49_273770	906	39	30	3	15	0.025	0.193548	0.25	0.0625	7.74193	0.25	0	10	0	23	T	TGME49_273770	906	55	53	14	61	0.0178571	0.203704	0.0666667	0.387097	11.4074	5.80645
TGME49_273860:261	0	15	0	3	T	TGME49_273860	261	65	33	6	13	0.0151515	0.470588	0.142857	0.285714	31.0588	2	1	26	0	35	T	TGME49_273860	261	74	74	50	48	0.0266667	0.36	0.0196078	0.734694	13.5	37.4694
TGME49_274060:1811	0	7	7	0	T	TGME49_274060	1811	21	30	23	24	0.0454546	0.258064	0.333333	0.04	5.67742	0.12	0	7	0	0	T	TGME49_274060	1811	28	17	1	17	0.0344828	0.444444	0.5	0.0555556	12.8889	0.111111
TGME49_274060:835	0	10	0	13	T	TGME49_274060	835	12	22	6	28	0.0769231	0.478261	0.142857	0.482759	6.21739	3.37931	0	9	0	0	T	TGME49_274060	835	30	24	1	53	0.0322581	0.4	0.5	0.0185185	12.4	0.037037
TGME49_275440:1123	0	67	21	45	T	TGME49_275440	1123	234	375	219	385	0.00425532	0.180851	0.1	0.119171	42.5	1.19171	44	133	10	62	T	TGME49_275440	1123	1394	923	597	584	0.0322581	0.145022	0.0183946	0.107692	4.49567	5.85455
TGME49_275440:1246	1	54	3	51	T	TGME49_275440	1246	253	302	103	303	0.00787402	0.181518	0.0384615	0.171053	23.0528	4.44737	55	198	113	109	T	TGME49_275440	1246	1450	1016	988	994	0.0385941	0.195674	0.115268	0.110553	5.07004	0.959094
TGME49_275440:1331	0	24	4	14	T	TGME49_275440	1331	153	135	66	127	0.00649351	0.183824	0.0746269	0.117188	28.3088	1.57031	29	158	26	80	T	TGME49_275440	1331	508	608	177	389	0.0589391	0.261084	0.151685	0.207692	4.42972	1.36923
TGME49_275440:1468	2	60	4	33	T	TGME49_275440	1468	406	349	145	250	0.00737101	0.174286	0.0342466	0.135458	23.6448	3.95538	111	538	54	457	T	TGME49_275440	1468	1578	1840	404	1472	0.070931	0.292776	0.135802	0.31093	4.12761	2.28958
TGME49_275440:2430	0	68	12	55	T	TGME49_275440	2430	253	266	98	282	0.00393701	0.258427	0.131313	0.19788	65.6405	1.50693	23	161	0	0	T	TGME49_275440	2430	336	494	109	337	0.0712166	0.327273	0.00909091	0.00295858	4.59545	0.325444
TGME49_275460:1867	0	7	0	1	T	TGME49_275460	1867	24	36	13	31	0.04	0.216216	0.0714286	0.0625	5.40541	0.875	0	9	0	0	T	TGME49_275460	1867	79	52	45	16	0.0125	0.188679	0.0217391	0.0588235	15.0943	2.70588
TGME49_275460:277	0	5	0	9	T	TGME49_275460	277	19	21	8	10	0.05	0.272727	0.111111	0.909091	5.45455	8.18182	0	16	0	0	T	TGME49_275460	277	48	35	11	8	0.0204082	0.472222	0.0833333	0.111111	23.1389	1.33333
TGME49_275810:604	0	29	7	12	T	TGME49_275810	604	103	75	28	37	0.00961539	0.394737	0.275862	0.342105	41.0526	1.24013	5	146	0	63	T	TGME49_275810	604	497	397	172	141	0.0120482	0.369347	0.00578035	0.450704	30.6558	77.9718
TGME49_275860:1628	0	5	0	2	T	TGME49_275860	1628	22	37	22	10	0.0434783	0.157895	0.0434783	0.272727	3.63158	6.27273	0	8	0	0	T	TGME49_275860	1628	66	49	18	54	0.0149254	0.18	0.0526316	0.0181818	12.06	0.345455
TGME49_276140:1160	0	5	0	8	T	TGME49_276140	1160	43	18	16	29	0.0227273	0.31579	0.0588235	0.3	13.8947	5.1	0	27	25	37	T	TGME49_276140	1160	74	86	91	82	0.0133333	0.321839	0.282609	0.457831	24.1379	1.62002
TGME49_276140:1179	0	8	0	1	T	TGME49_276140	1179	23	25	9	23	0.0416667	0.346154	0.1	0.0833333	8.30769	0.833333	0	17	0	62	T	TGME49_276140	1179	56	110	27	162	0.0175439	0.162162	0.0357143	0.386503	9.24324	10.8221
TGME49_276140:1546	0	5	0	0	T	TGME49_276140	1546	31	25	10	19	0.03125	0.230769	0.0909091	0.05	7.38462	0.55	0	10	0	21	T	TGME49_276140	1546	111	53	58	151	0.00892857	0.203704	0.0169492	0.144737	22.8148	8.53947
TGME49_276140:934	0	7	3	5	T	TGME49_276140	934	20	29	5	25	0.0476191	0.266667	0.666667	0.230769	5.6	0.346154	0	21	0	30	T	TGME49_276140	934	99	75	31	62	0.01	0.289474	0.03125	0.492063	28.9474	15.746
TGME49_276170:2300	0	8	0	0	T	TGME49_276170	2300	61	41	5	29	0.016129	0.214286	0.166667	0.0333333	13.2857	0.2	0	20	1	19	T	TGME49_276170	2300	40	45	8	19	0.0243902	0.456522	0.222222	1	18.7174	4.5
TGME49_276930:1091	0	5	0	5	T	TGME49_276930	1091	34	15	20	35	0.0285714	0.375	0.0476191	0.166667	13.125	3.5	0	12	0	5	T	TGME49_276930	1091	52	79	21	52	0.0188679	0.1625	0.0454545	0.113208	8.6125	2.49057
TGME49_276930:562	0	5	0	7	T	TGME49_276930	562	20	17	5	31	0.0476191	0.333333	0.166667	0.25	7	1.5	0	15	0	0	T	TGME49_276930	562	34	111	28	9	0.0285714	0.142857	0.0344828	0.1	5	2.9
TGME49_277080:1242	0	41	3	18	T	TGME49_277080	1242	153	265	126	325	0.00649351	0.157895	0.0314961	0.0582822	24.3158	1.85046	18	50	30	29	T	TGME49_277080	1242	575	276	262	216	0.0329861	0.184116	0.117871	0.138249	5.58161	1.17289
TGME49_277080:311	6	69	4	66	T	TGME49_277080	311	398	371	140	643	0.0175439	0.188172	0.035461	0.104037	10.7258	2.93385	14	46	0	0	T	TGME49_277080	311	147	95	16	32	0.101351	0.489583	0.0588235	0.030303	4.83056	0.515152
TGME49_277080:336	10	91	5	66	T	TGME49_277080	336	298	652	206	877	0.0367893	0.140888	0.0289855	0.0763098	3.8296	2.63269	34	137	28	77	T	TGME49_277080	336	765	356	199	165	0.0456919	0.386555	0.145	0.46988	8.46002	3.24055
TGME49_277080:389	0	78	16	27	T	TGME49_277080	389	196	306	120	203	0.00507614	0.257329	0.140496	0.137255	50.6938	0.976932	72	186	0	50	T	TGME49_277080	389	975	421	197	251	0.0747951	0.443128	0.00505051	0.202381	5.92456	40.0714
TGME49_277080:443	25	113	5	53	T	TGME49_277080	443	404	414	154	415	0.0641975	0.274699	0.0387097	0.129808	4.27896	3.35337	10	188	2	79	T	TGME49_277080	443	809	852	275	506	0.0135802	0.221571	0.0108696	0.157791	16.3157	14.5168
TGME49_277240:284	0	33	6	44	T	TGME49_277240	284	35	194	54	210	0.0277778	0.174359	0.127273	0.21327	6.27692	1.67569	46	222	66	233	T	TGME49_277240	284	669	701	404	663	0.0701493	0.317664	0.165432	0.35241	4.5284	2.13024
TGME49_277260:128	0	69	11	49	T	TGME49_277260	128	258	295	216	453	0.003861	0.236486	0.0552995	0.110132	61.25	1.99156	63	265	46	138	T	TGME49_277260	128	2138	1374	972	1295	0.0299205	0.193455	0.0483042	0.107253	6.46561	2.22037
TGME49_277260:184	0	53	11	12	T	TGME49_277260	184	178	350	124	364	0.00558659	0.153846	0.096	0.0356164	27.5385	0.371005	39	223	7	153	T	TGME49_277260	184	1580	880	484	836	0.0253004	0.254257	0.0164948	0.18399	10.0495	11.1544
TGME49_277260:336	0	99	1	62	T	TGME49_277260	336	125	306	159	358	0.00793651	0.325733	0.0125	0.175487	41.0423	14.039	39	272	39	260	T	TGME49_277260	336	2464	1417	1106	1445	0.0162272	0.192525	0.0361337	0.180498	11.8643	4.99528
TGME49_277270:297	0	69	25	119	T	TGME49_277270	297	131	178	93	250	0.00757576	0.391062	0.276596	0.478088	51.6201	1.72847	41	257	59	220	T	TGME49_277270	297	583	664	225	714	0.0719178	0.38797	0.265487	0.309091	5.39463	1.16424
TGME49_277270:48	0	39	2	57	T	TGME49_277270	48	44	249	72	250	0.0222222	0.16	0.0410959	0.231076	7.2	5.62284	53	214	0	122	T	TGME49_277270	48	761	725	319	559	0.0708661	0.296143	0.003125	0.219643	4.17891	70.2857
TGME49_277490:364	0	6	0	2	T	TGME49_277490	364	34	20	25	18	0.0285714	0.333333	0.0384615	0.157895	11.6667	4.10526	0	5	4	0	T	TGME49_277490	364	12	17	45	22	0.0769231	0.333333	0.108696	0.0434783	4.33333	0.4
TGME49_277840:1793	0	5	0	0	T	TGME49_277840	1793	27	22	1	14	0.0357143	0.26087	0.5	0.0666667	7.30435	0.133333	0	12	0	0	T	TGME49_277840	1793	28	37	32	39	0.0344828	0.342105	0.030303	0.025	9.92105	0.825
TGME49_278530:315	0	7	0	11	T	TGME49_278530	315	80	44	11	49	0.0123457	0.177778	0.0833333	0.24	14.4	2.88	0	15	0	0	T	TGME49_278530	315	121	79	33	121	0.00819672	0.2	0.0294118	0.00819672	24.4	0.278689
TGME49_278530:766	0	13	0	10	T	TGME49_278530	766	57	52	7	32	0.0172414	0.264151	0.125	0.333333	15.3208	2.66667	0	39	0	0	T	TGME49_278530	766	84	127	62	22	0.0117647	0.3125	0.015873	0.0434783	26.5625	2.73913
TGME49_278990:706	0	5	0	0	T	TGME49_278990	706	31	20	2	3	0.03125	0.285714	0.333333	0.25	9.14286	0.75	0	9	0	0	T	TGME49_278990	706	68	47	1	43	0.0144928	0.208333	0.5	0.0227273	14.375	0.0454545
TGME49_279100:1228	0	8	0	4	T	TGME49_279100	1228	67	46	19	66	0.0147059	0.191489	0.05	0.0746269	13.0213	1.49254	0	12	0	5	T	TGME49_279100	1228	37	66	6	36	0.0263158	0.19403	0.142857	0.162162	7.37313	1.13514
TGME49_279100:483	0	6	0	1	T	TGME49_279100	483	59	55	20	23	0.0166667	0.125	0.0476191	0.0833333	7.5	1.75	0	39	0	20	T	TGME49_279100	483	295	301	131	120	0.00337838	0.13245	0.00757576	0.173554	39.2053	22.9091
TGME49_280370:1238	0	8	0	10	T	TGME49_280370	1238	57	44	6	54	0.0172414	0.2	0.142857	0.2	11.6	1.4	0	8	0	0	T	TGME49_280370	1238	39	34	19	7	0.025	0.257143	0.05	0.125	10.2857	2.5
TGME49_280370:1529	0	7	7	2	T	TGME49_280370	1529	24	50	39	26	0.04	0.156863	0.2	0.111111	3.92157	0.555556	0	8	0	3	T	TGME49_280370	1529	95	69	21	42	0.0104167	0.128571	0.0454545	0.0930233	12.3429	2.04651
TGME49_280370:1549	0	8	0	1	T	TGME49_280370	1549	39	45	36	14	0.025	0.195652	0.027027	0.133333	7.82609	4.93333	0	7	0	0	T	TGME49_280370	1549	80	29	9	29	0.0123457	0.266667	0.1	0.0333333	21.6	0.333333
TGME49_280370:1552	0	8	1	8	T	TGME49_280370	1552	19	49	31	19	0.05	0.18	0.0625	0.45	3.6	7.2	4	52	0	12	T	TGME49_280370	1552	75	83	9	47	0.0657895	0.630952	0.1	0.270833	9.59048	2.70833
TGME49_280370:1766	0	6	2	1	T	TGME49_280370	1766	68	46	13	52	0.0144928	0.148936	0.214286	0.0377359	10.2766	0.176101	0	7	0	0	T	TGME49_280370	1766	36	20	22	1	0.027027	0.380952	0.0434783	0.5	14.0952	11.5
TGME49_280370:257	0	8	10	1	T	TGME49_280370	257	35	34	19	46	0.0277778	0.257143	0.55	0.0425532	9.25714	0.0773694	0	20	0	21	T	TGME49_280370	257	26	50	66	21	0.037037	0.411765	0.0149254	1	11.1176	67
TGME49_280370:299	0	8	1	0	T	TGME49_280370	299	33	43	24	43	0.0294118	0.204545	0.08	0.0227273	6.95455	0.284091	0	6	0	0	T	TGME49_280370	299	53	39	1	63	0.0185185	0.175	0.5	0.015625	9.45	0.03125
TGME49_280370:544	0	9	6	9	T	TGME49_280370	544	48	55	18	59	0.0204082	0.178571	0.368421	0.166667	8.75	0.452381	0	9	0	0	T	TGME49_280370	544	63	44	4	43	0.015625	0.222222	0.2	0.0227273	14.2222	0.113636
TGME49_280370:566	0	8	0	3	T	TGME49_280370	566	58	67	15	77	0.0169491	0.132353	0.0625	0.0512821	7.80882	0.820513	0	7	0	3	T	TGME49_280370	566	25	49	15	4	0.0384615	0.16	0.0625	0.8	4.16	12.8
TGME49_280380:1157	0	11	0	14	T	TGME49_280380	1157	45	40	15	60	0.0217391	0.292683	0.0625	0.245902	13.4634	3.93443	0	21	0	0	T	TGME49_280380	1157	51	109	12	21	0.0192308	0.2	0.0769231	0.0454545	10.4	0.590909
TGME49_280380:1276	0	15	8	15	T	TGME49_280380	1276	35	78	20	60	0.0277778	0.202532	0.428571	0.262295	7.29114	0.612022	0	13	0	1	T	TGME49_280380	1276	51	80	26	5	0.0192308	0.17284	0.037037	0.333333	8.98765	9
TGME49_280380:1326	0	7	0	16	T	TGME49_280380	1326	31	58	23	52	0.03125	0.135593	0.0416667	0.320755	4.33898	7.69811	0	7	0	0	T	TGME49_280380	1326	30	54	23	47	0.0322581	0.145455	0.0416667	0.0208333	4.50909	0.5
TGME49_280380:134	0	6	0	0	T	TGME49_280380	134	61	53	10	27	0.016129	0.12963	0.0909091	0.0357143	8.03704	0.392857	0	14	15	4	T	TGME49_280380	134	73	117	61	41	0.0135135	0.127119	0.258065	0.119048	9.40678	0.46131
TGME49_280380:1533	0	9	0	7	T	TGME49_280380	1533	37	58	19	75	0.0263158	0.169491	0.05	0.105263	6.44068	2.10526	0	23	12	1	T	TGME49_280380	1533	62	124	15	93	0.015873	0.192	0.8125	0.0212766	12.096	0.0261866
TGME49_280380:2206	0	10	0	9	T	TGME49_280380	2206	82	84	30	69	0.0120482	0.129412	0.0322581	0.142857	10.7412	4.42857	0	13	0	0	T	TGME49_280380	2206	247	94	42	99	0.00403226	0.147368	0.0232558	0.01	36.5474	0.43
TGME49_280380:950	0	25	1	16	T	TGME49_280380	950	117	126	40	75	0.00847458	0.204724	0.0487805	0.223684	24.1575	4.58553	0	23	0	9	T	TGME49_280380	950	81	111	25	41	0.0121951	0.214286	0.0384615	0.238095	17.5714	6.19048
TGME49_280522:5204	0	8	0	2	T	TGME49_280522	5204	47	22	17	16	0.0208333	0.391304	0.0555556	0.176471	18.7826	3.17647	0	15	0	44	T	TGME49_280522	5204	44	43	13	62	0.0222222	0.363636	0.0714286	0.714286	16.3636	10
TGME49_282055:2001	0	7	0	7	T	TGME49_282055	2001	17	29	13	40	0.0555556	0.266667	0.0714286	0.195122	4.8	2.73171	0	6	0	0	T	TGME49_282055	2001	41	22	19	22	0.0238095	0.304348	0.05	0.0434783	12.7826	0.869565
TGME49_282180:833	0	7	0	1	T	TGME49_282180	833	18	12	1	7	0.0526316	0.615385	0.5	0.25	11.6923	0.5	0	8	5	0	T	TGME49_282180	833	97	50	16	1	0.0102041	0.176471	0.352941	0.5	17.2941	1.41667
TGME49_283540:1437	0	10	0	4	T	TGME49_283540	1437	23	55	15	41	0.0416667	0.196429	0.0625	0.119048	4.71429	1.90476	0	34	51	2	T	TGME49_283540	1437	21	69	85	38	0.0454545	0.5	0.604651	0.0769231	11	0.127219
TGME49_283540:1728	0	13	0	0	T	TGME49_283540	1728	29	55	18	29	0.0333333	0.25	0.0526316	0.0333333	7.5	0.633333	0	24	0	34	T	TGME49_283540	1728	28	61	27	108	0.0344828	0.403226	0.0357143	0.321101	11.6935	8.99083
TGME49_283540:1741	0	15	0	16	T	TGME49_283540	1741	40	79	19	58	0.0243902	0.2	0.05	0.288136	8.2	5.76271	0	22	8	20	T	TGME49_283540	1741	25	76	53	128	0.0384615	0.298701	0.166667	0.162791	7.76623	0.976744
TGME49_283540:1797	0	5	0	5	T	TGME49_283540	1797	57	42	20	69	0.0172414	0.139535	0.0476191	0.0857143	8.09302	1.8	1	10	0	23	T	TGME49_283540	1797	51	51	19	24	0.0384615	0.211538	0.05	0.96	5.5	19.2
TGME49_283540:1949	0	9	4	0	T	TGME49_283540	1949	43	52	29	34	0.0227273	0.188679	0.166667	0.0285714	8.30189	0.171429	0	7	19	0	T	TGME49_283540	1949	120	56	23	115	0.00826446	0.140351	0.833333	0.00862069	16.9825	0.0103448
TGME49_283540:561	0	8	0	6	T	TGME49_283540	561	85	41	8	35	0.0116279	0.214286	0.111111	0.194444	18.4286	1.75	0	10	0	0	T	TGME49_283540	561	56	61	51	53	0.0175439	0.177419	0.0192308	0.0185185	10.1129	0.962963
TGME49_283780:142	0	14	0	14	T	TGME49_283780	142	24	28	6	47	0.04	0.517241	0.142857	0.3125	12.931	2.1875	0	10	0	0	T	TGME49_283780	142	47	36	21	16	0.0208333	0.297297	0.0454545	0.0588235	14.2703	1.29412
TGME49_283780:2077	0	10	0	4	T	TGME49_283780	2077	46	33	12	39	0.0212766	0.323529	0.0769231	0.125	15.2059	1.625	0	7	0	1	T	TGME49_283780	2077	36	21	5	23	0.027027	0.363636	0.166667	0.0833333	13.4545	0.5
TGME49_283780:491	0	5	0	0	T	TGME49_283780	491	17	24	1	36	0.0555556	0.24	0.5	0.027027	4.32	0.054054	0	5	0	0	T	TGME49_283780	491	52	28	74	42	0.0188679	0.206897	0.0133333	0.0232558	10.9655	1.74419
TGME49_283850:106	0	5	0	5	T	TGME49_283850	106	50	37	18	17	0.0196078	0.157895	0.0526316	0.333333	8.05263	6.33333	0	11	5	0	T	TGME49_283850	106	89	81	21	19	0.0111111	0.146341	0.272727	0.05	13.1707	0.183333
TGME49_283850:1578	0	5	0	1	T	TGME49_283850	1578	50	35	4	55	0.0196078	0.166667	0.2	0.0357143	8.5	0.178571	0	16	0	0	T	TGME49_283850	1578	91	120	3	20	0.0108696	0.140496	0.25	0.047619	12.9256	0.190476
TGME49_283850:2108	0	8	0	0	T	TGME49_283850	2108	15	33	3	29	0.0625	0.264706	0.25	0.0333333	4.23529	0.133333	0	12	0	0	T	TGME49_283850	2108	52	48	61	21	0.0188679	0.265306	0.016129	0.0454545	14.0612	2.81818
TGME49_283850:596	0	5	0	8	T	TGME49_283850	596	19	23	4	23	0.05	0.25	0.2	0.375	5	1.875	0	6	0	0	T	TGME49_283850	596	28	40	14	25	0.0344828	0.170732	0.0666667	0.0384615	4.95122	0.576923
TGME49_284180:3498	0	5	0	0	T	TGME49_284180	3498	38	24	3	6	0.025641	0.24	0.25	0.142857	9.36	0.571429	0	8	0	0	T	TGME49_284180	3498	7	8	22	1	0.125	1	0.0434783	0.5	8	11.5
TGME49_284180:465	0	5	0	0	T	TGME49_284180	465	58	22	1	8	0.0169491	0.26087	0.5	0.111111	15.3913	0.222222	0	5	0	0	T	TGME49_284180	465	56	12	23	10	0.0175439	0.461538	0.0416667	0.0909091	26.3077	2.18182
TGME49_284180:498	0	6	0	0	T	TGME49_284180	498	10	19	7	8	0.0909091	0.35	0.125	0.111111	3.85	0.888889	0	11	0	0	T	TGME49_284180	498	51	15	4	38	0.0192308	0.75	0.2	0.025641	39	0.128205
TGME49_284560:1053	0	31	7	3	T	TGME49_284560	1053	74	65	39	76	0.0133333	0.484849	0.2	0.0519481	36.3636	0.25974	7	62	0	22	T	TGME49_284560	1053	338	203	91	89	0.0235988	0.308824	0.0108696	0.255556	13.0864	23.5111
TGME49_284560:604	0	22	2	4	T	TGME49_284560	604	56	79	8	107	0.0175439	0.2875	0.333333	0.0462963	16.3875	0.138889	2	28	0	11	T	TGME49_284560	604	101	236	1	43	0.0294118	0.122363	0.5	0.272727	4.16034	0.545455
TGME49_285250:707	0	6	4	4	T	TGME49_285250	707	29	31	9	30	0.0333333	0.21875	0.5	0.16129	6.5625	0.322581	0	20	0	21	T	TGME49_285250	707	41	57	59	82	0.0238095	0.362069	0.0166667	0.26506	15.2069	15.9036
TGME49_285870:1205	0	8	0	2	T	TGME49_285870	1205	84	71	20	25	0.0117647	0.125	0.0476191	0.115385	10.625	2.42308	0	9	0	11	T	TGME49_285870	1205	97	37	64	101	0.0102041	0.263158	0.0153846	0.117647	25.7895	7.64706
TGME49_285870:1262	0	9	0	13	T	TGME49_285870	1262	43	33	33	35	0.0227273	0.294118	0.0294118	0.388889	12.9412	13.2222	0	17	51	0	T	TGME49_285870	1262	49	38	51	1	0.02	0.461538	1	0.5	23.0769	0.5
TGME49_285870:475	0	18	7	15	T	TGME49_285870	475	16	71	13	55	0.0588235	0.263889	0.571429	0.285714	4.48611	0.5	3	38	0	0	T	TGME49_285870	475	92	107	5	69	0.0430108	0.361111	0.166667	0.0142857	8.39583	0.0857143
TGME49_285870:579	0	10	0	5	T	TGME49_285870	579	42	41	1	77	0.0232558	0.261905	0.5	0.0769231	11.2619	0.153846	0	53	0	12	T	TGME49_285870	579	177	188	121	75	0.00561798	0.285714	0.00819672	0.171053	50.8571	20.8684
TGME49_285870:672	0	11	1	12	T	TGME49_285870	672	52	59	24	39	0.0188679	0.2	0.08	0.325	10.6	4.0625	0	19	0	0	T	TGME49_285870	672	164	82	33	97	0.00606061	0.240964	0.0294118	0.0102041	39.759	0.346939
TGME49_285870:762	0	6	4	13	T	TGME49_285870	762	44	31	8	32	0.0222222	0.21875	0.555556	0.424242	9.84375	0.763636	0	8	0	0	T	TGME49_285870	762	33	35	44	69	0.0294118	0.25	0.0222222	0.0142857	8.5	0.642857
TGME49_285980:1070	0	13	0	0	T	TGME49_285980	1070	65	57	8	35	0.0151515	0.241379	0.111111	0.0277778	15.931	0.25	0	5	0	0	T	TGME49_285980	1070	23	12	17	22	0.0416667	0.461538	0.0555556	0.0434783	11.0769	0.782609
TGME49_285980:1083	0	11	0	13	T	TGME49_285980	1083	55	68	8	60	0.0178571	0.173913	0.111111	0.229508	9.73913	2.06557	7	25	0	0	T	TGME49_285980	1083	58	38	16	51	0.135593	0.666667	0.0588235	0.0192308	4.91667	0.326923
TGME49_285980:1395	0	9	0	15	T	TGME49_285980	1395	36	43	10	70	0.027027	0.227273	0.0909091	0.225352	8.40909	2.47887	0	6	8	10	T	TGME49_285980	1395	27	40	16	71	0.0357143	0.170732	0.529412	0.152778	4.78049	0.28858
TGME49_285980:1444	0	10	5	14	T	TGME49_285980	1444	108	84	25	54	0.00917431	0.129412	0.230769	0.272727	14.1059	1.18182	0	20	26	0	T	TGME49_285980	1444	20	68	108	34	0.047619	0.304348	0.247706	0.0285714	6.3913	0.115344
TGME49_285980:1709	0	13	0	1	T	TGME49_285980	1709	21	71	11	45	0.0454546	0.194444	0.0833333	0.0434783	4.27778	0.521739	0	9	0	0	T	TGME49_285980	1709	31	54	99	9	0.03125	0.181818	0.01	0.1	5.81818	10
TGME49_285980:1909	0	7	0	0	T	TGME49_285980	1909	29	45	25	29	0.0333333	0.173913	0.0384615	0.0333333	5.21739	0.866667	0	12	0	0	T	TGME49_285980	1909	94	42	3	7	0.0105263	0.302326	0.25	0.125	28.7209	0.5
TGME49_285980:2166	0	10	0	0	T	TGME49_285980	2166	16	45	9	33	0.0588235	0.23913	0.1	0.0294118	4.06522	0.294118	0	11	0	18	T	TGME49_285980	2166	26	39	9	45	0.037037	0.3	0.1	0.413043	8.1	4.13043
TGME49_285980:2429	0	13	2	9	T	TGME49_285980	2429	25	70	21	36	0.0384615	0.197183	0.136364	0.27027	5.12676	1.98198	0	9	1	0	T	TGME49_285980	2429	46	69	1	26	0.0212766	0.142857	1	0.037037	6.71429	0.037037
TGME49_286090:326	0	21	0	15	T	TGME49_286090	326	58	120	34	86	0.0169491	0.181818	0.0285714	0.183908	10.7273	6.43678	0	17	0	0	T	TGME49_286090	326	35	148	56	125	0.0277778	0.120805	0.0175439	0.00793651	4.34899	0.452381
TGME49_286090:411	0	12	0	2	T	TGME49_286090	411	146	72	41	23	0.00680272	0.178082	0.0238095	0.125	26.1781	5.25	0	13	0	17	T	TGME49_286090	411	28	76	13	34	0.0344828	0.181818	0.0714286	0.514286	5.27273	7.2
TGME49_286090:498	0	16	0	12	T	TGME49_286090	498	93	80	51	63	0.0106383	0.209876	0.0192308	0.203125	19.7284	10.5625	0	47	0	0	T	TGME49_286090	498	79	135	7	62	0.0125	0.352941	0.125	0.015873	28.2353	0.126984
TGME49_286090:648	0	8	0	9	T	TGME49_286090	648	76	72	34	54	0.012987	0.123288	0.0285714	0.181818	9.49315	6.36364	0	13	0	0	T	TGME49_286090	648	144	85	57	77	0.00689655	0.162791	0.0172414	0.0128205	23.6047	0.74359
TGME49_286090:658	0	15	10	8	T	TGME49_286090	658	101	132	46	79	0.00980392	0.120301	0.234043	0.1125	12.2707	0.480682	5	30	0	0	T	TGME49_286090	658	168	117	66	8	0.035503	0.262712	0.0149254	0.111111	7.39972	7.44444
TGME49_286090:690	0	9	2	0	T	TGME49_286090	690	77	67	32	76	0.0128205	0.147059	0.0909091	0.012987	11.4706	0.142857	0	9	0	0	T	TGME49_286090	690	73	57	19	69	0.0135135	0.172414	0.05	0.0142857	12.7586	0.285714
TGME49_286420:1127	0	17	2	10	T	TGME49_286420	1127	65	86	27	73	0.0151515	0.206897	0.107143	0.148649	13.6552	1.38739	15	70	29	29	T	TGME49_286420	1127	777	474	263	360	0.0205656	0.149474	0.113636	0.0831025	7.26816	0.731302
TGME49_286420:1539	0	13	0	4	T	TGME49_286420	1539	160	104	61	100	0.00621118	0.133333	0.016129	0.0495049	21.4667	3.06931	23	161	13	75	T	TGME49_286420	1539	623	711	260	651	0.0384615	0.227528	0.0536398	0.116564	5.91573	2.17309
TGME49_286420:1703	0	19	2	31	T	TGME49_286420	1703	25	106	49	101	0.0384615	0.186916	0.06	0.313725	4.85981	5.22876	43	187	1	134	T	TGME49_286420	1703	780	788	194	475	0.056338	0.238276	0.0102564	0.283613	4.2294	27.6523
TGME49_286420:1782	0	25	0	33	T	TGME49_286420	1782	62	92	20	91	0.015873	0.27957	0.0476191	0.369565	17.6129	7.76087	0	80	0	23	T	TGME49_286420	1782	329	502	33	283	0.0030303	0.161034	0.0294118	0.084507	53.1412	2.87324
TGME49_286420:401	0	28	0	16	T	TGME49_286420	401	79	142	54	121	0.0125	0.202797	0.0181818	0.139344	16.2238	7.66393	40	109	4	62	T	TGME49_286420	401	1237	649	295	443	0.0331179	0.169231	0.0168919	0.141892	5.10994	8.4
TGME49_286420:432	0	33	0	7	T	TGME49_286420	432	105	81	13	30	0.00943396	0.414634	0.0714286	0.258064	43.9512	3.6129	52	162	24	46	T	TGME49_286420	432	1181	779	412	421	0.0448393	0.208974	0.0605327	0.111374	4.66052	1.83991
TGME49_286420:476	0	35	5	26	T	TGME49_286420	476	68	83	24	106	0.0144928	0.428571	0.24	0.252336	29.5714	1.0514	7	104	0	71	T	TGME49_286420	476	525	392	203	236	0.0152091	0.267176	0.00490196	0.303797	17.5668	61.9747
TGME49_286420:480	0	33	0	3	T	TGME49_286420	480	71	140	20	138	0.0138889	0.241135	0.0476191	0.028777	17.3617	0.604317	14	97	0	179	T	TGME49_286420	480	520	489	171	385	0.0287908	0.2	0.00581395	0.466321	6.94667	80.2073
TGME49_286470:1385	0	7	0	4	T	TGME49_286470	1385	18	30	3	49	0.0526316	0.258064	0.25	0.1	4.90323	0.4	0	5	0	0	T	TGME49_286470	1385	39	45	39	62	0.025	0.130435	0.025	0.015873	5.21739	0.634921
TGME49_286470:1929	0	7	0	0	T	TGME49_286470	1929	57	20	3	7	0.0172414	0.380952	0.25	0.125	22.0952	0.5	0	8	0	0	T	TGME49_286470	1929	11	29	2	22	0.0833333	0.3	0.333333	0.0434783	3.6	0.130435
TGME49_286530:1070	0	8	2	3	T	TGME49_286530	1070	32	17	2	33	0.030303	0.5	1	0.117647	16.5	0.117647	0	10	0	0	T	TGME49_286530	1070	93	78	3	106	0.0106383	0.139241	0.25	0.00934579	13.0886	0.0373832
TGME49_286530:1124	0	8	0	1	T	TGME49_286530	1124	72	61	16	35	0.0136986	0.145161	0.0588235	0.0555556	10.5968	0.944444	13	35	34	21	T	TGME49_286530	1124	180	90	91	70	0.0773481	0.395604	0.380435	0.309859	5.1146	0.814487
TGME49_286530:222	0	6	1	1	T	TGME49_286530	222	47	18	12	21	0.0208333	0.368421	0.153846	0.0909091	17.6842	0.590909	0	24	0	30	T	TGME49_286530	222	41	31	76	34	0.0238095	0.78125	0.012987	0.885714	32.8125	68.2
TGME49_286530:361	0	13	0	1	T	TGME49_286530	361	22	25	3	32	0.0434783	0.538462	0.25	0.0606061	12.3846	0.242424	0	19	0	38	T	TGME49_286530	361	95	47	28	38	0.0104167	0.416667	0.0344828	1	40	29
TGME49_286530:476	0	5	0	0	T	TGME49_286530	476	40	9	27	8	0.0243902	0.6	0.0357143	0.111111	24.6	3.11111	0	11	0	15	T	TGME49_286530	476	121	55	131	80	0.00819672	0.214286	0.00757576	0.197531	26.1429	26.0741
TGME49_286530:479	0	5	0	9	T	TGME49_286530	479	40	16	28	17	0.0243902	0.352941	0.0344828	0.555556	14.4706	16.1111	0	10	0	31	T	TGME49_286530	479	139	88	131	162	0.00714286	0.123596	0.00757576	0.196319	17.3034	25.9141
TGME49_286530:922	0	6	0	8	T	TGME49_286530	922	16	21	2	24	0.0588235	0.318182	0.333333	0.36	5.40909	1.08	0	12	0	0	T	TGME49_286530	922	116	62	52	71	0.00854701	0.206349	0.0188679	0.0138889	24.1429	0.736111
TGME49_286630:1847	0	7	0	0	T	TGME49_286630	1847	39	21	6	37	0.025	0.363636	0.142857	0.0263158	14.5455	0.18421	0	14	0	8	T	TGME49_286630	1847	50	30	82	86	0.0196078	0.483871	0.0120482	0.103448	24.6774	8.58621
TGME49_286630:647	0	8	0	30	T	TGME49_286630	647	28	27	17	47	0.0344828	0.321429	0.0555556	0.645833	9.32143	11.625	6	35	5	30	T	TGME49_286630	647	104	64	5	59	0.0666667	0.553846	1	0.516667	8.30769	0.516667
TGME49_286630:923	0	8	2	14	T	TGME49_286630	923	24	28	3	21	0.04	0.310345	0.75	0.681818	7.75862	0.909091	0	14	0	12	T	TGME49_286630	923	45	52	5	27	0.0217391	0.283019	0.166667	0.464286	13.0189	2.78571
TGME49_288360:113	0	11	0	5	T	TGME49_288360	113	31	50	5	34	0.03125	0.235294	0.166667	0.171429	7.52941	1.02857	0	5	0	0	T	TGME49_288360	113	65	41	6	18	0.0151515	0.142857	0.142857	0.0526316	9.42857	0.368421
TGME49_288360:1788	0	12	3	22	T	TGME49_288360	1788	18	56	23	95	0.0526316	0.22807	0.166667	0.239583	4.33333	1.4375	0	12	0	19	T	TGME49_288360	1788	101	84	34	59	0.00980392	0.152941	0.0285714	0.333333	15.6	11.6667
TGME49_288360:2291	0	5	8	2	T	TGME49_288360	2291	57	32	45	44	0.0172414	0.181818	0.195652	0.0666667	10.5455	0.340741	0	13	0	0	T	TGME49_288360	2291	121	77	97	29	0.00819672	0.179487	0.0102041	0.0333333	21.8974	3.26667
TGME49_288360:2677	0	7	0	2	T	TGME49_288360	2677	21	47	28	47	0.0454546	0.166667	0.0344828	0.0625	3.66667	1.8125	0	7	27	25	T	TGME49_288360	2677	30	48	30	58	0.0322581	0.163265	0.903226	0.440678	5.06122	0.487893
TGME49_288360:3050	0	12	0	11	T	TGME49_288360	3050	23	59	11	94	0.0416667	0.216667	0.0833333	0.126316	5.2	1.51579	1	10	0	2	T	TGME49_288360	3050	45	59	28	9	0.0434783	0.183333	0.0344828	0.3	4.21667	8.7
TGME49_288360:3086	0	9	0	3	T	TGME49_288360	3086	39	38	8	45	0.025	0.25641	0.111111	0.0869565	10.2564	0.782609	0	10	0	0	T	TGME49_288360	3086	49	45	26	49	0.02	0.23913	0.037037	0.02	11.9565	0.54
TGME49_288360:617	0	8	9	0	T	TGME49_288360	617	49	44	37	19	0.02	0.2	0.263158	0.05	10	0.19	0	31	21	17	T	TGME49_288360	617	149	94	99	70	0.00666667	0.336842	0.22	0.253521	50.5263	1.15237
TGME49_288360:924	0	9	0	0	T	TGME49_288360	924	91	41	17	25	0.0108696	0.238095	0.0555556	0.0384615	21.9048	0.692308	0	9	24	43	T	TGME49_288360	924	40	39	141	110	0.0243902	0.25	0.176056	0.396396	10.25	2.25153
TGME49_288380:1493	0	13	3	6	T	TGME49_288380	1493	25	67	21	32	0.0384615	0.205882	0.181818	0.212121	5.35294	1.16667	7	90	70	72	T	TGME49_288380	1493	349	319	162	247	0.0228571	0.284375	0.435583	0.294355	12.4414	0.675772
TGME49_288380:2706	0	8	5	4	T	TGME49_288380	2706	114	65	71	75	0.00869565	0.136364	0.0833333	0.0657895	15.6818	0.789474	5	22	0	0	T	TGME49_288380	2706	136	132	87	79	0.0437956	0.172932	0.0113636	0.0125	3.94862	1.1
TGME49_288630:1319	0	7	0	0	T	TGME49_288630	1319	26	28	1	25	0.037037	0.275862	0.5	0.0384615	7.44828	0.0769231	0	11	0	0	T	TGME49_288630	1319	76	68	59	57	0.012987	0.173913	0.0166667	0.0172414	13.3913	1.03448
TGME49_288630:943	0	7	0	3	T	TGME49_288630	943	6	15	7	5	0.142857	0.5	0.125	0.666667	3.5	5.33333	0	15	0	0	T	TGME49_288630	943	33	51	17	49	0.0294118	0.307692	0.0555556	0.02	10.4615	0.36
TGME49_288650:1624	4	46	11	45	T	TGME49_288650	1624	119	233	123	275	0.0416667	0.200855	0.0967742	0.166667	4.82051	1.72222	29	146	24	73	T	TGME49_288650	1624	709	742	181	628	0.0422535	0.197847	0.137363	0.117647	4.68237	0.856471
TGME49_288650:2102	0	23	5	12	T	TGME49_288650	2102	42	118	25	215	0.0232558	0.201681	0.230769	0.0601852	8.67227	0.260802	5	73	0	68	T	TGME49_288650	2102	361	487	187	332	0.0165746	0.151639	0.00531915	0.207207	9.14891	38.955
TGME49_288650:2415	9	67	21	27	T	TGME49_288650	2415	248	252	102	319	0.0401606	0.268775	0.213592	0.0875	6.69249	0.409659	124	311	18	163	T	TGME49_288650	2415	1271	902	529	696	0.0982704	0.345515	0.0358491	0.235294	3.51596	6.56347
TGME49_288650:953	1	124	10	49	T	TGME49_288650	953	87	323	88	233	0.0227273	0.385802	0.123595	0.213675	16.9753	1.72883	32	220	0	305	T	TGME49_288650	953	1740	962	613	827	0.0189546	0.229491	0.00162866	0.369565	12.1074	226.913
TGME49_288650:996	0	43	6	33	T	TGME49_288650	996	189	206	82	246	0.00526316	0.21256	0.0843374	0.137652	40.3865	1.63216	19	130	8	36	T	TGME49_288650	996	1228	575	504	352	0.0162734	0.227431	0.0178218	0.104816	13.9756	5.88133
TGME49_288720:1296	0	13	0	13	T	TGME49_288720	1296	108	87	68	102	0.00917431	0.159091	0.0144928	0.135922	17.3409	9.37864	51	246	63	164	T	TGME49_288720	1296	664	796	205	390	0.0781955	0.309912	0.31068	0.421995	3.9633	1.3583
TGME49_288720:1476	0	23	4	17	T	TGME49_288720	1476	61	127	41	124	0.016129	0.1875	0.119048	0.144	11.625	1.2096	0	47	0	0	T	TGME49_288720	1476	361	323	41	331	0.00276243	0.148148	0.0238095	0.00301205	53.6296	0.126506
TGME49_288720:1708	0	13	0	6	T	TGME49_288720	1708	20	54	23	55	0.0476191	0.254545	0.0416667	0.125	5.34546	3	6	80	3	42	T	TGME49_288720	1708	609	616	126	282	0.0114754	0.13128	0.0314961	0.151943	11.4401	4.8242
TGME49_289050:4289	0	7	3	1	T	TGME49_289050	4289	28	27	5	11	0.0344828	0.285714	0.666667	0.166667	8.28571	0.25	0	8	0	0	T	TGME49_289050	4289	18	20	7	41	0.0526316	0.428571	0.125	0.0238095	8.14286	0.190476
TGME49_289050:5310	0	5	0	0	T	TGME49_289050	5310	21	23	3	4	0.0454546	0.25	0.25	0.2	5.5	0.8	0	6	3	7	T	TGME49_289050	5310	32	25	11	40	0.030303	0.269231	0.333333	0.195122	8.88462	0.585366
TGME49_289540:1509	0	7	0	1	T	TGME49_289540	1509	31	21	5	5	0.03125	0.363636	0.166667	0.333333	11.6364	2	0	14	12	0	T	TGME49_289540	1509	45	75	40	12	0.0217391	0.197368	0.317073	0.0769231	9.07895	0.242604
TGME49_289540:2383	0	6	0	1	T	TGME49_289540	2383	40	15	3	15	0.0243902	0.4375	0.25	0.125	17.9375	0.5	8	19	16	0	T	TGME49_289540	2383	109	61	31	43	0.0818182	0.322581	0.53125	0.0227273	3.94265	0.0427807
TGME49_289540:4336	0	5	1	0	T	TGME49_289540	4336	17	23	9	10	0.0555556	0.25	0.2	0.0909091	4.5	0.454545	0	8	0	24	T	TGME49_289540	4336	69	62	46	57	0.0142857	0.142857	0.0212766	0.431034	10	20.2586
TGME49_289600:1026	0	26	0	11	T	TGME49_289600	1026	28	115	10	89	0.0344828	0.232759	0.0909091	0.133333	6.75	1.46667	0	32	0	23	T	TGME49_289600	1026	185	223	2	113	0.00537634	0.147321	0.333333	0.210526	27.4018	0.631579
TGME49_289600:318	0	24	0	1	T	TGME49_289600	318	43	75	14	63	0.0227273	0.328947	0.0666667	0.03125	14.4737	0.46875	0	26	13	0	T	TGME49_289600	318	91	144	100	23	0.0108696	0.186207	0.138614	0.0416667	17.131	0.300595
TGME49_289600:375	0	13	0	18	T	TGME49_289600	375	30	74	25	72	0.0322581	0.186667	0.0384615	0.260274	5.78667	6.76712	0	10	0	0	T	TGME49_289600	375	65	74	29	20	0.0151515	0.146667	0.0333333	0.047619	9.68	1.42857
TGME49_289600:556	0	10	0	5	T	TGME49_289600	556	31	55	36	35	0.03125	0.196429	0.027027	0.166667	6.28571	6.16667	11	27	0	5	T	TGME49_289600	556	368	201	25	90	0.0325203	0.138614	0.0384615	0.0659341	4.26238	1.71429
TGME49_289600:698	0	13	0	9	T	TGME49_289600	698	102	102	20	115	0.00970874	0.135922	0.0476191	0.0862069	14	1.81035	7	22	0	42	T	TGME49_289600	698	171	138	110	71	0.0465116	0.165468	0.00900901	0.597222	3.55755	66.2917
TGME49_289600:706	0	17	0	28	T	TGME49_289600	706	92	114	25	141	0.0107527	0.156522	0.0384615	0.204225	14.5565	5.30986	0	40	0	27	T	TGME49_289600	706	152	201	80	120	0.00653595	0.20297	0.0123457	0.231405	31.0545	18.7438
TGME49_289620:1352	0	8	0	2	T	TGME49_289620	1352	42	44	13	41	0.0232558	0.2	0.0714286	0.0714286	8.6	1	0	18	17	10	T	TGME49_289620	1352	144	124	112	144	0.00689655	0.152	0.159292	0.0758621	22.04	0.476245
TGME49_289620:3004	0	5	8	6	T	TGME49_289620	3004	19	31	15	29	0.05	0.1875	0.5625	0.233333	3.75	0.414815	0	5	0	0	T	TGME49_289620	3004	37	39	13	13	0.0263158	0.15	0.0714286	0.0714286	5.7	1
TGME49_289620:385	0	5	0	4	T	TGME49_289620	385	24	19	11	12	0.04	0.3	0.0833333	0.384615	7.5	4.61538	0	7	0	0	T	TGME49_289620	385	186	46	55	45	0.00534759	0.170213	0.0178571	0.0217391	31.8298	1.21739
TGME49_289620:530	0	10	0	0	T	TGME49_289620	530	32	33	20	28	0.030303	0.323529	0.0476191	0.0344828	10.6765	0.724138	1	5	0	0	T	TGME49_289620	530	27	16	40	31	0.0714286	0.352941	0.0243902	0.03125	4.94118	1.28125
TGME49_289630:1209	0	8	0	0	T	TGME49_289630	1209	30	29	27	23	0.0322581	0.3	0.0357143	0.0416667	9.3	1.16667	0	5	0	0	T	TGME49_289630	1209	30	25	1	21	0.0322581	0.230769	0.5	0.0454545	7.15385	0.0909091
TGME49_289650:2381	0	6	0	2	T	TGME49_289650	2381	34	12	6	23	0.0285714	0.538462	0.142857	0.125	18.8462	0.875	0	7	0	0	T	TGME49_289650	2381	49	25	21	7	0.02	0.307692	0.0454545	0.125	15.3846	2.75
TGME49_289650:2483	0	7	0	3	T	TGME49_289650	2483	39	56	46	50	0.025	0.140351	0.0212766	0.0784314	5.61404	3.68628	0	5	0	0	T	TGME49_289650	2483	33	22	1	6	0.0294118	0.26087	0.5	0.142857	8.86957	0.285714
TGME49_289680:1122	0	13	2	8	T	TGME49_289680	1122	13	29	12	16	0.0714286	0.466667	0.230769	0.529412	6.53333	2.29412	0	14	0	17	T	TGME49_289680	1122	33	23	22	18	0.0294118	0.625	0.0434783	0.947368	21.25	21.7895
TGME49_289690:1112	0	13	2	0	T	TGME49_289690	1112	37	62	35	47	0.0263158	0.222222	0.0833333	0.0208333	8.44444	0.25	10	82	0	21	T	TGME49_289690	1112	173	221	77	193	0.0632184	0.373874	0.0128205	0.113402	5.914	8.84536
TGME49_289690:1339	0	22	0	19	T	TGME49_289690	1339	50	92	36	96	0.0196078	0.247312	0.027027	0.206186	12.6129	7.62887	13	74	1	104	T	TGME49_289690	1339	329	466	222	333	0.0424242	0.1606	0.00896861	0.314371	3.78556	35.0524
TGME49_289690:1379	0	25	2	6	T	TGME49_289690	1379	84	136	14	89	0.0117647	0.189781	0.2	0.0777778	16.1314	0.388889	0	71	69	81	T	TGME49_289690	1379	386	341	270	246	0.00258398	0.210526	0.258303	0.331984	81.4737	1.28525
TGME49_289690:1430	0	16	0	3	T	TGME49_289690	1430	43	91	19	63	0.0227273	0.184783	0.05	0.0625	8.13044	1.25	11	135	0	126	T	TGME49_289690	1430	357	389	165	273	0.0335196	0.348718	0.0060241	0.463504	10.4034	76.9416
TGME49_289690:553	9	58	4	15	T	TGME49_289690	553	156	188	58	139	0.0636943	0.312169	0.0847458	0.114286	4.90106	1.34857	31	184	3	73	T	TGME49_289690	553	581	548	133	325	0.0549828	0.336976	0.0298507	0.226994	6.12876	7.60429
TGME49_289750:233	0	9	0	11	T	TGME49_289750	233	21	57	37	66	0.0454546	0.172414	0.0263158	0.179104	3.7931	6.80597	9	13	0	0	T	TGME49_289750	233	294	91	30	37	0.0338983	0.152174	0.0322581	0.0263158	4.48913	0.815789
TGME49_289750:408	0	10	0	21	T	TGME49_289750	408	26	72	17	63	0.037037	0.150685	0.0555556	0.34375	4.06849	6.1875	1	46	31	13	T	TGME49_289750	408	275	258	64	108	0.00724638	0.181467	0.492308	0.12844	25.0425	0.260894
TGME49_289750:721	0	9	0	23	T	TGME49_289750	721	97	79	58	109	0.0102041	0.125	0.0169491	0.218182	12.25	12.8727	7	46	3	0	T	TGME49_289750	721	527	273	114	136	0.0151515	0.171533	0.0347826	0.00729927	11.3212	0.209854
TGME49_289750:864	0	5	0	1	T	TGME49_289750	864	30	48	24	67	0.0322581	0.122449	0.04	0.0294118	3.79592	0.735294	0	10	0	2	T	TGME49_289750	864	136	74	14	41	0.00729927	0.146667	0.0666667	0.0714286	20.0933	1.07143
TGME49_289750:868	0	9	1	2	T	TGME49_289750	868	30	57	20	59	0.0322581	0.172414	0.0952381	0.05	5.34483	0.525	0	18	0	18	T	TGME49_289750	868	141	107	20	59	0.00704225	0.175926	0.047619	0.316667	24.9815	6.65
TGME49_289920:1207	0	5	0	0	T	TGME49_289920	1207	27	27	26	22	0.0357143	0.214286	0.037037	0.0434783	6	1.17391	0	5	0	0	T	TGME49_289920	1207	65	21	14	18	0.0151515	0.272727	0.0666667	0.0526316	18	0.789474
TGME49_289920:2038	0	13	0	1	T	TGME49_289920	2038	44	61	28	63	0.0222222	0.225806	0.0344828	0.03125	10.1613	0.90625	1	8	0	13	T	TGME49_289920	2038	52	41	39	32	0.0377358	0.214286	0.025	0.424242	5.67857	16.9697
TGME49_289920:626	0	5	0	4	T	TGME49_289920	626	17	29	13	33	0.0555556	0.2	0.0714286	0.147059	3.6	2.05882	0	9	0	0	T	TGME49_289920	626	67	52	27	81	0.0147059	0.188679	0.0357143	0.0121951	12.8302	0.341463
TGME49_290660:2934	0	22	0	15	T	TGME49_290660	2934	82	71	16	69	0.0120482	0.319444	0.0588235	0.228571	26.5139	3.88571	0	22	0	0	T	TGME49_290660	2934	64	50	64	47	0.0153846	0.45098	0.0153846	0.0208333	29.3137	1.35417
TGME49_290670:2154	0	6	0	3	T	TGME49_290670	2154	31	22	7	6	0.03125	0.304348	0.125	0.571429	9.73913	4.57143	0	13	0	10	T	TGME49_290670	2154	31	52	65	38	0.03125	0.264151	0.0151515	0.282051	8.45283	18.6154
TGME49_290670:2989	0	5	0	1	T	TGME49_290670	2989	22	14	5	24	0.0434783	0.4	0.166667	0.08	9.2	0.48	0	10	0	0	T	TGME49_290670	2989	38	61	56	35	0.025641	0.177419	0.0175439	0.0277778	6.91935	1.58333
TGME49_290670:3614	0	5	0	16	T	TGME49_290670	3614	18	31	14	74	0.0526316	0.1875	0.0666667	0.226667	3.5625	3.4	0	11	0	3	T	TGME49_290670	3614	117	68	12	27	0.00847458	0.173913	0.0769231	0.142857	20.5217	1.85714
TGME49_290700:1273	0	13	6	15	T	TGME49_290700	1273	37	37	21	35	0.0263158	0.368421	0.318182	0.444444	14	1.39682	0	22	3	43	T	TGME49_290700	1273	234	187	67	110	0.00425532	0.12234	0.0588235	0.396396	28.75	6.73874
TGME49_290700:2485	0	5	0	2	T	TGME49_290700	2485	52	35	27	31	0.0188679	0.166667	0.0357143	0.09375	8.83333	2.625	8	21	25	0	T	TGME49_290700	2485	255	96	122	62	0.0351562	0.226804	0.211382	0.015873	6.45132	0.0750916
TGME49_290700:2805	0	7	5	5	T	TGME49_290700	2805	39	58	26	54	0.025	0.135593	0.222222	0.109091	5.42373	0.490909	2	15	0	41	T	TGME49_290700	2805	220	85	99	186	0.0135747	0.186047	0.01	0.224599	13.7054	22.4599
TGME49_290700:2969	0	12	0	1	T	TGME49_290700	2969	31	52	32	45	0.03125	0.245283	0.030303	0.0434783	7.84906	1.43478	0	8	2	0	T	TGME49_290700	2969	92	53	2	20	0.0107527	0.166667	1	0.047619	15.5	0.047619
TGME49_290700:3210	0	5	0	11	T	TGME49_290700	3210	68	34	19	23	0.0144928	0.171429	0.05	0.5	11.8286	10	10	52	0	13	T	TGME49_290700	3210	200	193	42	134	0.0547264	0.273196	0.0232558	0.103704	4.99203	4.45926
TGME49_290700:834	0	6	0	12	T	TGME49_290700	834	28	57	3	23	0.0344828	0.12069	0.25	0.541667	3.5	2.16667	0	8	0	14	T	TGME49_290700	834	51	42	53	37	0.0192308	0.209302	0.0185185	0.394737	10.8837	21.3158
TGME49_290700:842	0	18	1	14	T	TGME49_290700	842	28	76	2	62	0.0344828	0.246753	0.666667	0.238095	7.15584	0.357143	0	25	0	9	T	TGME49_290700	842	86	76	55	46	0.0114943	0.337662	0.0178571	0.212766	29.3766	11.9149
TGME49_290700:918	0	27	0	23	T	TGME49_290700	918	19	91	29	98	0.05	0.304348	0.0333333	0.242424	6.08696	7.27273	0	24	26	30	T	TGME49_290700	918	142	127	89	92	0.00699301	0.195312	0.3	0.333333	27.9297	1.11111
TGME49_290700:938	0	68	2	11	T	TGME49_290700	938	16	187	40	110	0.0588235	0.367021	0.0731707	0.108108	6.23936	1.47748	0	58	0	70	T	TGME49_290700	938	193	186	91	161	0.00515464	0.315508	0.0108696	0.438272	61.2086	40.321
TGME49_291890:2289	4	31	2	13	T	TGME49_291890	2289	142	147	101	163	0.034965	0.216216	0.0294118	0.0853658	6.18378	2.90244	1	20	2	3	T	TGME49_291890	2289	173	135	122	138	0.0114943	0.154412	0.0243902	0.028777	13.4338	1.17986
TGME49_291890:3076	0	46	11	26	T	TGME49_291890	3076	132	132	48	166	0.0075188	0.353384	0.244898	0.161677	47	0.66018	0	24	0	19	T	TGME49_291890	3076	18	84	12	74	0.0526316	0.294118	0.0769231	0.266667	5.58824	3.46667
TGME49_291890:3656	0	18	4	12	T	TGME49_291890	3656	198	149	81	139	0.00502513	0.126667	0.0609756	0.0928571	25.2067	1.52286	7	35	0	8	T	TGME49_291890	3656	182	149	132	121	0.0437158	0.24	0.0075188	0.0737705	5.49	9.81148
TGME49_291960:1565	0	11	0	3	T	TGME49_291960	1565	37	37	13	41	0.0263158	0.31579	0.0714286	0.0952381	12	1.33333	0	5	0	0	T	TGME49_291960	1565	53	48	43	53	0.0185185	0.122449	0.0227273	0.0185185	6.61224	0.814815
TGME49_291960:1691	0	12	0	2	T	TGME49_291960	1691	53	40	1	26	0.0185185	0.317073	0.5	0.111111	17.1219	0.222222	0	9	0	0	T	TGME49_291960	1691	105	46	96	54	0.00943396	0.212766	0.0103093	0.0181818	22.5532	1.76364
TGME49_291960:2701	0	6	0	0	T	TGME49_291960	2701	141	56	14	22	0.00704225	0.122807	0.0666667	0.0434783	17.4386	0.652174	0	7	32	0	T	TGME49_291960	2701	69	60	73	54	0.0142857	0.131148	0.445946	0.0181818	9.18033	0.0407713
TGME49_291960:2908	0	6	0	1	T	TGME49_291960	2908	37	54	7	24	0.0263158	0.127273	0.125	0.08	4.83636	0.64	0	7	0	0	T	TGME49_291960	2908	43	44	1	20	0.0227273	0.177778	0.5	0.047619	7.82222	0.0952381
TGME49_292130:1288	0	11	6	1	T	TGME49_292130	1288	88	70	36	88	0.011236	0.169014	0.189189	0.0224719	15.0422	0.11878	1	43	0	57	T	TGME49_292130	1288	418	323	49	426	0.00477327	0.135802	0.02	0.135831	28.4506	6.79157
TGME49_292130:1430	0	10	3	5	T	TGME49_292130	1430	69	71	18	62	0.0142857	0.152778	0.210526	0.0952381	10.6944	0.452381	7	58	0	0	T	TGME49_292130	1430	444	370	194	203	0.0179775	0.15903	0.00512821	0.00490196	8.84602	0.955882
TGME49_292130:1785	0	17	3	7	T	TGME49_292130	1785	107	94	42	53	0.00925926	0.189474	0.0930233	0.148148	20.4632	1.59259	24	117	29	50	T	TGME49_292130	1785	544	555	249	377	0.0458716	0.21223	0.12	0.134921	4.62662	1.12434
TGME49_293180:1003	0	5	0	10	T	TGME49_293180	1003	12	14	9	18	0.0769231	0.4	0.1	0.578947	5.2	5.78947	0	7	42	0	T	TGME49_293180	1003	45	35	42	5	0.0217391	0.222222	1	0.166667	10.2222	0.166667
TGME49_293180:1044	0	8	0	3	T	TGME49_293180	1044	33	33	15	14	0.0294118	0.264706	0.0625	0.266667	9	4.26667	0	6	0	0	T	TGME49_293180	1044	27	45	40	34	0.0357143	0.152174	0.0243902	0.0285714	4.26087	1.17143
TGME49_293180:1091	0	5	0	0	T	TGME49_293180	1091	24	27	19	13	0.04	0.214286	0.05	0.0714286	5.35714	1.42857	1	17	7	0	T	TGME49_293180	1091	58	65	7	69	0.0338983	0.272727	1	0.0142857	8.04545	0.0142857
TGME49_293180:1623	0	5	0	9	T	TGME49_293180	1623	56	21	10	21	0.0175439	0.272727	0.0909091	0.454545	15.5455	5	0	17	0	0	T	TGME49_293180	1623	28	87	9	43	0.0344828	0.204545	0.1	0.0227273	5.93182	0.227273
TGME49_293180:2019	0	5	0	0	T	TGME49_293180	2019	50	29	6	20	0.0196078	0.2	0.142857	0.0476191	10.2	0.333333	0	7	0	12	T	TGME49_293180	2019	15	23	4	12	0.0625	0.333333	0.2	1	5.33333	5
TGME49_293180:2105	0	7	2	3	T	TGME49_293180	2105	47	27	13	29	0.0208333	0.285714	0.214286	0.133333	13.7143	0.622222	0	8	0	0	T	TGME49_293180	2105	74	46	17	101	0.0133333	0.191489	0.0555556	0.00980392	14.3617	0.176471
TGME49_293180:2123	0	5	0	0	T	TGME49_293180	2123	29	25	26	30	0.0333333	0.230769	0.037037	0.0322581	6.92308	0.870968	0	7	0	0	T	TGME49_293180	2123	64	59	55	81	0.0153846	0.133333	0.0178571	0.0121951	8.66667	0.682927
TGME49_293180:2530	0	9	0	1	T	TGME49_293180	2530	30	64	14	51	0.0322581	0.153846	0.0666667	0.0384615	4.76923	0.576923	0	9	0	0	T	TGME49_293180	2530	47	65	1	27	0.0208333	0.151515	0.5	0.0357143	7.27273	0.0714286
TGME49_293180:640	0	5	0	5	T	TGME49_293180	640	18	19	11	49	0.0526316	0.3	0.0833333	0.12	5.7	1.44	3	8	0	0	T	TGME49_293180	640	177	71	6	3	0.0224719	0.125	0.142857	0.25	5.5625	1.75
TGME49_293180:946	0	6	0	1	T	TGME49_293180	946	36	32	11	20	0.027027	0.212121	0.0833333	0.0952381	7.84849	1.14286	0	11	0	1	T	TGME49_293180	946	55	66	14	27	0.0178571	0.179104	0.0666667	0.0714286	10.0299	1.07143
TGME49_293260:353	0	6	0	0	T	TGME49_293260	353	42	20	19	14	0.0232558	0.333333	0.05	0.0666667	14.3333	1.33333	0	9	0	0	T	TGME49_293260	353	15	40	64	31	0.0625	0.243902	0.0153846	0.03125	3.90244	2.03125
TGME49_293360:1155	0	22	0	16	T	TGME49_293360	1155	31	94	10	49	0.03125	0.242105	0.0909091	0.34	7.74737	3.74	0	38	0	0	T	TGME49_293360	1155	177	289	214	107	0.00561798	0.134483	0.00465116	0.00925926	23.9379	1.99074
TGME49_293360:250	0	7	0	3	T	TGME49_293360	250	90	33	12	27	0.010989	0.235294	0.0769231	0.142857	21.4118	1.85714	0	14	0	34	T	TGME49_293360	250	84	79	1	82	0.0117647	0.1875	0.5	0.421687	15.9375	0.843373
TGME49_293360:440	0	8	0	7	T	TGME49_293360	440	16	33	17	40	0.0588235	0.264706	0.0555556	0.195122	4.5	3.5122	0	20	1	0	T	TGME49_293360	440	66	49	15	44	0.0149254	0.42	0.125	0.0222222	28.14	0.177778
TGME49_293360:868	0	14	0	17	T	TGME49_293360	868	42	54	9	30	0.0232558	0.272727	0.1	0.580645	11.7273	5.80645	6	25	0	11	T	TGME49_293360	868	92	85	14	78	0.0752688	0.302326	0.0666667	0.151899	4.01661	2.27848
TGME49_293360:943	0	12	0	2	T	TGME49_293360	943	25	71	30	60	0.0384615	0.180556	0.0322581	0.0491803	4.69444	1.52459	10	54	0	51	T	TGME49_293360	943	148	174	19	118	0.0738255	0.314286	0.05	0.436975	4.25714	8.7395
TGME49_293430:2638	0	6	0	2	T	TGME49_293430	2638	20	18	18	22	0.0476191	0.368421	0.0526316	0.130435	7.73684	2.47826	0	10	0	17	T	TGME49_293430	2638	90	51	42	30	0.010989	0.211538	0.0232558	0.580645	19.25	24.9677
TGME49_293690:1077	0	14	0	1	T	TGME49_293690	1077	74	58	41	64	0.0133333	0.254237	0.0238095	0.0307692	19.0678	1.29231	10	80	9	51	T	TGME49_293690	1077	336	307	102	158	0.032641	0.262987	0.0970874	0.327044	8.05697	3.36855
TGME49_293690:1382	0	21	0	54	T	TGME49_293690	1382	53	81	27	125	0.0185185	0.268293	0.0357143	0.436508	14.4878	12.2222	7	34	0	0	T	TGME49_293690	1382	222	98	120	22	0.0358744	0.353535	0.00826446	0.0434783	9.8548	5.26087
TGME49_293690:1449	0	17	5	4	T	TGME49_293690	1449	125	115	42	84	0.00793651	0.155172	0.139535	0.0588235	19.5517	0.421569	11	18	0	0	T	TGME49_293690	1449	397	143	156	36	0.0301508	0.131944	0.00636943	0.027027	4.37616	4.24324
TGME49_293690:890	0	8	2	4	T	TGME49_293690	890	70	50	13	45	0.0140845	0.176471	0.214286	0.108696	12.5294	0.507246	36	94	54	15	T	TGME49_293690	890	531	326	299	348	0.0695489	0.29052	0.183333	0.0458453	4.1772	0.250065
TGME49_293740:480	0	14	0	1	T	TGME49_293740	480	46	78	35	27	0.0212766	0.189873	0.0277778	0.0714286	8.92405	2.57143	0	12	0	23	T	TGME49_293740	480	38	58	13	134	0.025641	0.220339	0.0714286	0.177778	8.59322	2.48889
TGME49_293740:550	0	14	0	8	T	TGME49_293740	550	38	59	15	34	0.025641	0.25	0.0625	0.257143	9.75	4.11429	0	49	0	49	T	TGME49_293740	550	84	119	1	97	0.0117647	0.416667	0.5	0.510204	35.4167	1.02041
TGME49_293770:1063	0	5	0	4	T	TGME49_293770	1063	20	20	9	14	0.0476191	0.285714	0.1	0.333333	6	3.33333	5	5	0	0	T	TGME49_293770	1063	75	20	8	12	0.0789474	0.285714	0.111111	0.0769231	3.61905	0.692308
TGME49_293870:415	0	20	5	36	T	TGME49_293870	415	70	65	18	62	0.0140845	0.318182	0.31579	0.587302	22.5909	1.85979	14	51	0	47	T	TGME49_293870	415	250	236	178	192	0.059761	0.219409	0.00558659	0.248705	3.67145	44.5181
TGME49_293870:511	0	9	3	11	T	TGME49_293870	511	50	53	13	40	0.0196078	0.185185	0.285714	0.292683	9.44444	1.02439	13	96	0	113	T	TGME49_293870	511	265	341	91	315	0.0526316	0.283626	0.0108696	0.360759	5.38889	33.1899
TGME49_294200:1133	0	7	0	1	T	TGME49_294200	1133	110	61	37	92	0.00900901	0.129032	0.0263158	0.0215054	14.3226	0.817204	0	7	0	14	T	TGME49_294200	1133	40	64	31	95	0.0243902	0.123077	0.03125	0.15625	5.04615	5
TGME49_294200:1355	0	9	0	17	T	TGME49_294200	1355	89	71	44	116	0.0111111	0.138889	0.0222222	0.153846	12.5	6.92308	6	30	0	0	T	TGME49_294200	1355	193	163	45	102	0.0360825	0.189024	0.0217391	0.00970874	5.23868	0.446602
TGME49_294200:1505	0	10	0	3	T	TGME49_294200	1505	55	77	41	69	0.0178571	0.141026	0.0238095	0.0571429	7.89744	2.4	1	28	0	0	T	TGME49_294200	1505	286	205	140	187	0.00696864	0.140777	0.0070922	0.00531915	20.2015	0.75
TGME49_294200:2064	1	18	3	25	T	TGME49_294200	2064	52	80	21	66	0.0377359	0.234568	0.181818	0.38806	6.21605	2.13433	13	61	49	61	T	TGME49_294200	2064	244	264	299	276	0.0571429	0.233962	0.166667	0.223827	4.09434	1.34296
TGME49_294200:2108	0	13	0	2	T	TGME49_294200	2108	39	63	38	53	0.025	0.21875	0.025641	0.0555556	8.75	2.16667	0	41	34	0	T	TGME49_294200	2108	306	270	207	259	0.00325733	0.154982	0.168269	0.00384615	47.5793	0.0228571
TGME49_294200:2503	0	29	13	18	T	TGME49_294200	2503	173	154	67	165	0.00574713	0.193548	0.205882	0.114458	33.6774	0.555938	2	24	34	54	T	TGME49_294200	2503	139	155	70	247	0.0214286	0.160256	0.492958	0.221774	7.47863	0.449885
TGME49_294200:2754	0	6	0	5	T	TGME49_294200	2754	81	51	21	76	0.0121951	0.134615	0.0454546	0.0779221	11.0385	1.71429	0	12	0	28	T	TGME49_294200	2754	80	50	52	79	0.0123457	0.254902	0.0188679	0.3625	20.6471	19.2125
TGME49_294200:2902	0	9	0	4	T	TGME49_294200	2902	49	73	40	69	0.02	0.135135	0.0243902	0.0714286	6.75676	2.92857	1	21	0	12	T	TGME49_294200	2902	131	162	81	105	0.0151515	0.134969	0.0121951	0.122642	8.90798	10.0566
TGME49_294200:962	0	17	5	24	T	TGME49_294200	962	59	108	55	161	0.0166667	0.165138	0.107143	0.154321	9.90826	1.44033	1	28	0	0	T	TGME49_294200	962	238	240	57	83	0.0083682	0.120332	0.0172414	0.0119048	14.3797	0.690476
TGME49_294230:121	0	12	0	2	T	TGME49_294230	121	21	36	12	25	0.0454546	0.351351	0.0769231	0.115385	7.72973	1.5	18	35	3	0	T	TGME49_294230	121	373	104	89	72	0.0508021	0.342857	0.0444444	0.0136986	6.74887	0.308219
TGME49_294230:222	0	10	1	17	T	TGME49_294230	222	32	52	7	42	0.030303	0.207547	0.25	0.418605	6.84906	1.67442	0	6	0	0	T	TGME49_294230	222	22	34	11	14	0.0434783	0.2	0.0833333	0.0666667	4.6	0.8
TGME49_294230:224	0	7	0	0	T	TGME49_294230	224	32	52	7	38	0.030303	0.150943	0.125	0.025641	4.98113	0.205128	0	7	0	18	T	TGME49_294230	224	22	47	18	18	0.0434783	0.166667	0.0526316	1	3.83333	19
TGME49_294230:226	0	7	0	0	T	TGME49_294230	226	32	62	7	41	0.030303	0.126984	0.125	0.0238095	4.19048	0.190476	1	10	0	0	T	TGME49_294230	226	57	64	12	18	0.0344828	0.169231	0.0769231	0.0526316	4.90769	0.684211
TGME49_294230:392	0	9	0	15	T	TGME49_294230	392	30	25	1	19	0.0322581	0.384615	0.5	0.8	11.9231	1.6	4	28	0	19	T	TGME49_294230	392	106	116	22	44	0.046729	0.247863	0.0434783	0.444444	5.30427	10.2222
TGME49_294230:505	0	21	0	15	T	TGME49_294230	505	58	70	35	72	0.0169491	0.309859	0.0277778	0.219178	18.2817	7.89041	0	19	0	0	T	TGME49_294230	505	71	89	64	41	0.0138889	0.222222	0.0153846	0.0238095	16	1.54762
TGME49_294670:628	0	7	0	1	T	TGME49_294670	628	12	16	3	6	0.0769231	0.470588	0.25	0.285714	6.11765	1.14286	0	9	0	7	T	TGME49_294670	628	26	39	55	7	0.037037	0.25	0.0178571	1	6.75	56
TGME49_294790:1578	0	7	0	0	T	TGME49_294790	1578	19	28	2	18	0.05	0.275862	0.333333	0.0526316	5.51724	0.157895	0	5	0	27	T	TGME49_294790	1578	83	34	2	42	0.0119048	0.171429	0.333333	0.651163	14.4	1.95349
TGME49_294790:1604	0	10	0	7	T	TGME49_294790	1604	22	25	21	34	0.0434783	0.423077	0.0454546	0.228571	9.73077	5.02857	0	12	0	10	T	TGME49_294790	1604	135	73	35	42	0.00735294	0.175676	0.0277778	0.255814	23.8919	9.2093
TGME49_294800:1137	0	6	0	5	T	TGME49_294800	1137	48	54	32	58	0.0204082	0.127273	0.030303	0.101695	6.23636	3.35593	15	142	11	78	T	TGME49_294800	1137	398	491	161	271	0.0401003	0.29065	0.0740741	0.290441	7.24809	3.92096
TGME49_294800:1204	0	7	2	10	T	TGME49_294800	1204	79	63	19	83	0.0125	0.125	0.15	0.130952	10	0.873016	0	22	0	25	T	TGME49_294800	1204	278	118	80	175	0.00358423	0.193277	0.0123457	0.147727	53.9244	11.9659
TGME49_294800:1452	0	16	6	13	T	TGME49_294800	1452	19	47	43	55	0.05	0.354167	0.159091	0.25	7.08333	1.57143	0	22	14	65	T	TGME49_294800	1452	48	77	29	173	0.0204082	0.294872	0.5	0.37931	14.4487	0.758621
TGME49_294800:1580	0	16	5	33	T	TGME49_294800	1580	33	55	20	66	0.0294118	0.303571	0.285714	0.507463	10.3214	1.77612	22	38	0	35	T	TGME49_294800	1580	346	106	213	54	0.0662824	0.364486	0.0046729	0.654545	5.49898	140.073
TGME49_294800:1605	0	9	0	14	T	TGME49_294800	1605	25	73	48	69	0.0384615	0.135135	0.0204082	0.214286	3.51351	10.5	5	20	6	0	T	TGME49_294800	1605	322	134	134	128	0.0185759	0.155556	0.0518519	0.00775194	8.37407	0.149502
TGME49_294800:224	0	15	0	9	T	TGME49_294800	224	63	84	20	96	0.015625	0.188235	0.0476191	0.103093	12.0471	2.16495	0	38	9	17	T	TGME49_294800	224	104	147	19	108	0.00952381	0.263514	0.5	0.165138	27.6689	0.330275
TGME49_294800:260	0	6	4	7	T	TGME49_294800	260	69	39	8	46	0.0142857	0.175	0.555556	0.170213	12.25	0.306383	0	49	0	8	T	TGME49_294800	260	47	142	44	47	0.0208333	0.34965	0.0222222	0.1875	16.7832	8.4375
TGME49_294800:662	0	11	0	18	T	TGME49_294800	662	59	59	11	80	0.0166667	0.2	0.0833333	0.234568	12	2.81481	48	103	3	107	T	TGME49_294800	662	1117	639	410	458	0.0438283	0.1625	0.00973236	0.235294	3.70765	24.1765
TGME49_294800:725	0	12	3	10	T	TGME49_294800	725	81	63	25	65	0.0121951	0.203125	0.153846	0.166667	16.6562	1.08333	19	58	28	40	T	TGME49_294800	725	786	474	273	421	0.025413	0.124211	0.105839	0.0971564	4.88768	0.91796
TGME49_294800:832	1	8	5	14	T	TGME49_294800	832	92	61	44	68	0.0215054	0.145161	0.133333	0.217391	6.75	1.63044	17	60	0	27	T	TGME49_294800	832	337	317	126	207	0.0532544	0.191824	0.00787402	0.134615	3.60203	17.0962
TGME49_294800:981	0	5	0	1	T	TGME49_294800	981	28	44	47	57	0.0344828	0.133333	0.0208333	0.0344828	3.86667	1.65517	1	25	0	4	T	TGME49_294800	981	95	128	137	71	0.0208333	0.20155	0.00724638	0.0694444	9.67442	9.58333
TGME49_294870:4132	0	6	0	0	T	TGME49_294870	4132	25	18	3	16	0.0384615	0.368421	0.25	0.0588235	9.57895	0.235294	0	8	0	0	T	TGME49_294870	4132	68	55	60	36	0.0144928	0.160714	0.0163934	0.027027	11.0893	1.64865
TGME49_294870:92	0	5	0	5	T	TGME49_294870	92	64	38	45	26	0.0153846	0.153846	0.0217391	0.222222	10	10.2222	0	6	0	0	T	TGME49_294870	92	26	27	1	28	0.037037	0.25	0.5	0.0344828	6.75	0.0689655
TGME49_295030:1589	0	8	0	0	T	TGME49_295030	1589	25	22	1	7	0.0384615	0.391304	0.5	0.125	10.1739	0.25	0	7	0	0	T	TGME49_295030	1589	37	37	12	2	0.0263158	0.210526	0.0769231	0.333333	8	4.33333
TGME49_295030:2306	0	10	0	10	T	TGME49_295030	2306	19	35	12	13	0.05	0.305556	0.0769231	0.785714	6.11111	10.2143	0	9	0	0	T	TGME49_295030	2306	122	60	26	147	0.00813008	0.163934	0.037037	0.00675676	20.1639	0.182432
TGME49_295030:2549	0	6	5	13	T	TGME49_295030	2549	36	31	8	45	0.027027	0.21875	0.666667	0.304348	8.09375	0.456522	0	18	0	0	T	TGME49_295030	2549	22	38	9	5	0.0434783	0.487179	0.1	0.166667	11.2051	1.66667
TGME49_295105:1022	0	6	0	2	T	TGME49_295105	1022	169	41	43	33	0.00588235	0.166667	0.0227273	0.0882353	28.3333	3.88235	0	20	0	10	T	TGME49_295105	1022	168	159	33	124	0.00591716	0.13125	0.0294118	0.088	22.1812	2.992
TGME49_295105:1083	0	9	0	8	T	TGME49_295105	1083	29	46	13	29	0.0333333	0.212766	0.0714286	0.3	6.38298	4.2	2	12	0	12	T	TGME49_295105	1083	82	63	39	39	0.0361446	0.203125	0.025	0.325	5.61979	13
TGME49_295105:1377	0	6	0	0	T	TGME49_295105	1377	55	47	24	32	0.0178571	0.145833	0.04	0.030303	8.16667	0.757576	9	55	22	0	T	TGME49_295105	1377	173	257	93	187	0.0574713	0.217054	0.244681	0.00531915	3.77674	0.0217391
TGME49_295105:449	0	8	0	0	T	TGME49_295105	449	40	33	12	33	0.0243902	0.264706	0.0769231	0.0294118	10.8529	0.382353	8	29	0	19	T	TGME49_295105	449	253	219	24	217	0.0354331	0.136364	0.04	0.0917431	3.84848	2.29358
TGME49_295105:480	0	14	0	29	T	TGME49_295105	480	39	43	13	46	0.025	0.340909	0.0714286	0.638298	13.6364	8.93617	0	14	4	64	T	TGME49_295105	480	56	72	52	105	0.0175439	0.205479	0.0943396	0.613208	11.7123	6.5
TGME49_295105:87	0	8	0	5	T	TGME49_295105	87	46	72	40	45	0.0212766	0.123288	0.0243902	0.130435	5.79452	5.34783	3	15	11	6	T	TGME49_295105	87	246	117	105	101	0.0161943	0.135593	0.113208	0.0686275	8.37288	0.606209
TGME49_295105:930	0	8	0	0	T	TGME49_295105	930	66	51	24	39	0.0149254	0.173077	0.04	0.025	11.5961	0.625	8	41	0	2	T	TGME49_295105	930	322	209	168	133	0.0278638	0.2	0.00591716	0.0223881	7.17778	3.78358
TGME49_295110:1274	0	19	3	14	T	TGME49_295110	1274	186	158	46	163	0.00534759	0.125786	0.0851064	0.0914634	23.522	1.07469	0	5	15	0	T	TGME49_295110	1274	88	44	100	75	0.011236	0.133333	0.158416	0.0131579	11.8667	0.0830592
TGME49_295110:141	0	11	0	3	T	TGME49_295110	141	54	74	27	53	0.0181818	0.16	0.0357143	0.0740741	8.8	2.07407	8	14	17	9	T	TGME49_295110	141	255	100	141	115	0.0351562	0.148515	0.126761	0.0862069	4.22442	0.680077
TGME49_295110:1457	0	6	0	0	T	TGME49_295110	1457	45	44	7	44	0.0217391	0.155556	0.125	0.0222222	7.15556	0.177778	4	16	0	0	T	TGME49_295110	1457	237	120	120	123	0.0210084	0.140496	0.00826446	0.00806452	6.6876	0.975806
TGME49_295110:1548	0	12	0	9	T	TGME49_295110	1548	70	84	29	104	0.0140845	0.152941	0.0333333	0.0952381	10.8588	2.85714	0	26	0	72	T	TGME49_295110	1548	58	86	47	125	0.0169492	0.310345	0.0208333	0.579365	18.3103	27.8095
TGME49_295110:1725	10	28	4	18	T	TGME49_295110	1725	251	140	69	143	0.0436508	0.205674	0.0714286	0.131944	4.7118	1.84722	6	14	20	5	T	TGME49_295110	1725	202	60	180	92	0.0344828	0.245902	0.116022	0.0645161	7.13115	0.556068
TGME49_295110:1942	8	49	9	41	T	TGME49_295110	1942	260	189	77	145	0.0344828	0.263158	0.128205	0.287671	7.63158	2.24384	0	24	0	36	T	TGME49_295110	1942	239	126	53	184	0.00416667	0.19685	0.0185185	0.2	47.2441	10.8
TGME49_295110:1982	0	34	5	26	T	TGME49_295110	1982	100	161	53	104	0.00990099	0.216049	0.111111	0.257143	21.821	2.31429	7	8	0	3	T	TGME49_295110	1982	238	64	127	101	0.0334728	0.138462	0.0078125	0.0392157	4.13654	5.01961
TGME49_295110:2031	10	77	5	61	T	TGME49_295110	2031	271	255	64	268	0.0404412	0.304688	0.0923077	0.230483	7.53409	2.4969	4	19	0	35	T	TGME49_295110	2031	336	99	130	247	0.0148368	0.2	0.00763359	0.145161	13.48	19.0161
TGME49_295110:2269	0	34	0	23	T	TGME49_295110	2269	122	287	50	214	0.00813008	0.121528	0.0196078	0.111628	14.9479	5.69302	0	33	0	0	T	TGME49_295110	2269	181	148	86	261	0.00549451	0.228188	0.0114943	0.00381679	41.5302	0.332061
TGME49_295110:438	0	12	0	4	T	TGME49_295110	438	81	69	22	60	0.0121951	0.185714	0.0434783	0.0819672	15.2286	1.88525	1	23	56	68	T	TGME49_295110	438	234	93	175	126	0.00851064	0.255319	0.323864	0.543307	30	1.67758
TGME49_295110:494	0	18	0	4	T	TGME49_295110	494	88	62	34	37	0.011236	0.301587	0.0285714	0.131579	26.8413	4.60526	0	25	0	31	T	TGME49_295110	494	180	129	82	155	0.00552486	0.2	0.0120482	0.205128	36.2	17.0256
TGME49_295125:704	0	6	0	1	T	TGME49_295125	704	57	52	8	35	0.0172414	0.132076	0.111111	0.0555556	7.66038	0.5	4	12	0	0	T	TGME49_295125	704	194	103	122	101	0.025641	0.125	0.00813008	0.00980392	4.875	1.20588
TGME49_295125:871	0	5	0	4	T	TGME49_295125	871	51	49	12	43	0.0192308	0.12	0.0769231	0.113636	6.24	1.47727	0	13	0	0	T	TGME49_295125	871	129	80	151	87	0.00769231	0.17284	0.00657895	0.0113636	22.4691	1.72727
TGME49_295125:981	0	16	1	17	T	TGME49_295125	981	123	123	25	127	0.00806452	0.137097	0.0769231	0.140625	17	1.82812	2	8	0	0	T	TGME49_295125	981	74	62	28	103	0.04	0.142857	0.0344828	0.00961539	3.57143	0.278846
TGME49_295350:813	0	17	0	14	T	TGME49_295350	813	51	109	19	96	0.0192308	0.163636	0.05	0.154639	8.50909	3.09278	8	34	0	3	T	TGME49_295350	813	164	136	61	63	0.0545455	0.255474	0.016129	0.0625	4.6837	3.875
TGME49_295360:1006	0	10	0	0	T	TGME49_295360	1006	34	29	14	30	0.0285714	0.366667	0.0666667	0.0322581	12.8333	0.483871	0	16	0	16	T	TGME49_295360	1006	63	65	39	18	0.015625	0.257576	0.025	0.894737	16.4848	35.7895
TGME49_295360:1544	0	8	0	10	T	TGME49_295360	1544	35	44	7	31	0.0277778	0.2	0.125	0.34375	7.2	2.75	0	21	0	0	T	TGME49_295360	1544	78	87	17	78	0.0126582	0.25	0.0555556	0.0126582	19.75	0.227848
TGME49_295360:1608	0	6	0	0	T	TGME49_295360	1608	61	24	16	38	0.016129	0.28	0.0588235	0.025641	17.36	0.435897	1	22	42	0	T	TGME49_295360	1608	139	109	209	52	0.0142857	0.209091	0.204762	0.0188679	14.6364	0.0921457
TGME49_295360:1626	0	6	1	3	T	TGME49_295360	1626	44	40	11	48	0.0222222	0.170732	0.166667	0.0816327	7.68293	0.489796	0	17	0	0	T	TGME49_295360	1626	103	121	89	124	0.00961539	0.147541	0.0111111	0.008	15.3443	0.72
TGME49_295360:1903	0	10	0	4	T	TGME49_295360	1903	15	39	7	30	0.0625	0.275	0.125	0.16129	4.4	1.29032	1	25	0	1	T	TGME49_295360	1903	50	77	48	1	0.0392157	0.333333	0.0204082	1	8.5	49
TGME49_295360:2002	0	8	0	8	T	TGME49_295360	2002	26	64	17	94	0.037037	0.138461	0.0555556	0.0947368	3.73846	1.70526	0	19	0	0	T	TGME49_295360	2002	182	131	57	48	0.00546448	0.151515	0.0172414	0.0204082	27.7273	1.18367
TGME49_295360:928	0	5	0	19	T	TGME49_295360	928	79	49	22	52	0.0125	0.12	0.0434783	0.377358	9.6	8.67924	1	18	8	0	T	TGME49_295360	928	205	96	58	83	0.00970874	0.195876	0.152542	0.0119048	20.1753	0.0780423
TGME49_295360:947	0	9	0	7	T	TGME49_295360	947	28	44	9	50	0.0344828	0.222222	0.1	0.156863	6.44444	1.56863	0	29	0	18	T	TGME49_295360	947	244	176	155	56	0.00408163	0.169492	0.00641026	0.333333	41.5254	52
TGME49_295420:3601	0	5	0	14	T	TGME49_295420	3601	20	13	1	19	0.0476191	0.428571	0.5	0.75	9	1.5	0	28	0	18	T	TGME49_295420	3601	12	66	2	18	0.0769231	0.432836	0.333333	1	5.62687	3
TGME49_295935:8766	0	14	0	6	T	TGME49_295935	8766	40	84	16	59	0.0243902	0.176471	0.0588235	0.116667	7.23529	1.98333	5	13	0	18	T	TGME49_295935	8766	320	112	102	185	0.0186916	0.123894	0.00970874	0.102151	6.62832	10.5215
TGME49_296340:560	0	5	0	7	T	TGME49_296340	560	43	24	13	51	0.0227273	0.24	0.0714286	0.153846	10.56	2.15385	0	23	27	0	T	TGME49_296340	560	44	47	44	75	0.0222222	0.5	0.622222	0.0131579	22.5	0.0211466
TGME49_297060:1030	0	6	0	8	T	TGME49_297060	1030	85	49	17	76	0.0116279	0.14	0.0555556	0.116883	12.04	2.1039	0	15	0	0	T	TGME49_297060	1030	85	101	91	55	0.0116279	0.156863	0.0108696	0.0178571	13.4902	1.64286
TGME49_297060:855	0	5	0	9	T	TGME49_297060	855	51	43	6	29	0.0192308	0.136364	0.142857	0.333333	7.09091	2.33333	6	37	0	19	T	TGME49_297060	855	144	193	170	161	0.0482759	0.195876	0.00584795	0.123457	4.05744	21.1111
TGME49_297060:911	0	6	0	2	T	TGME49_297060	911	57	31	8	34	0.0172414	0.21875	0.111111	0.0857143	12.6875	0.771429	0	35	0	47	T	TGME49_297060	911	300	202	139	206	0.00332226	0.17734	0.00714286	0.231884	53.3793	32.4638
TGME49_297070:2369	0	8	0	10	T	TGME49_297070	2369	43	34	11	24	0.0227273	0.257143	0.0833333	0.44	11.3143	5.28	0	19	0	1	T	TGME49_297070	2369	24	88	29	63	0.04	0.224719	0.0333333	0.03125	5.61798	0.9375
TGME49_297070:799	0	9	3	0	T	TGME49_297070	799	21	33	11	4	0.0454546	0.294118	0.333333	0.2	6.47059	0.6	0	11	0	51	T	TGME49_297070	799	48	41	51	193	0.0204082	0.285714	0.0192308	0.268041	14	13.9381
TGME49_297070:955	0	9	0	8	T	TGME49_297070	955	43	42	5	26	0.0227273	0.232558	0.166667	0.333333	10.2326	2	3	18	0	0	T	TGME49_297070	955	85	80	130	49	0.0465116	0.234568	0.00763359	0.02	5.04321	2.62
TGME49_297430:1800	0	10	3	14	T	TGME49_297430	1800	21	48	4	54	0.0454546	0.22449	0.8	0.272727	4.93878	0.340909	0	12	13	0	T	TGME49_297430	1800	115	74	128	44	0.00862069	0.173333	0.108527	0.0222222	20.1067	0.204762
TGME49_297430:183	0	35	2	37	T	TGME49_297430	183	89	65	27	96	0.0111111	0.545454	0.107143	0.391753	49.0909	3.65636	0	31	0	55	T	TGME49_297430	183	32	87	73	70	0.030303	0.363636	0.0135135	0.788732	12	58.3662
TGME49_297430:2136	0	22	0	12	T	TGME49_297430	2136	23	73	25	57	0.0416667	0.310811	0.0384615	0.224138	7.45946	5.82759	0	17	31	35	T	TGME49_297430	2136	43	115	47	82	0.0227273	0.155172	0.666667	0.433735	6.82759	0.650602
TGME49_297430:2288	0	5	0	0	T	TGME49_297430	2288	67	37	9	17	0.0147059	0.157895	0.1	0.0555556	10.7368	0.555556	0	7	0	16	T	TGME49_297430	2288	26	40	46	32	0.037037	0.195122	0.0212766	0.515152	5.26829	24.2121
TGME49_297430:344	0	53	26	43	T	TGME49_297430	344	53	97	31	87	0.0185185	0.55102	0.84375	0.5	29.7551	0.592593	10	51	0	27	T	TGME49_297430	344	113	77	46	43	0.0964912	0.666667	0.0212766	0.636364	6.90909	29.9091
TGME49_297430:590	0	5	6	1	T	TGME49_297430	590	34	37	19	39	0.0285714	0.157895	0.35	0.05	5.52632	0.142857	0	8	16	0	T	TGME49_297430	590	52	54	28	49	0.0188679	0.163636	0.586207	0.02	8.67273	0.0341176
TGME49_297810:1191	0	9	0	1	T	TGME49_297810	1191	23	31	11	17	0.0416667	0.3125	0.0833333	0.111111	7.5	1.33333	1	6	0	8	T	TGME49_297810	1191	92	41	67	16	0.0215054	0.166667	0.0147059	0.529412	7.75	36
TGME49_297810:544	0	6	0	2	T	TGME49_297810	544	24	26	9	15	0.04	0.259259	0.1	0.1875	6.48148	1.875	1	12	43	35	T	TGME49_297810	544	32	37	46	35	0.0606061	0.342105	0.93617	1	5.64474	1.06818
TGME49_297810:850	0	6	0	7	T	TGME49_297810	850	37	29	25	15	0.0263158	0.233333	0.0384615	0.5	8.86667	13	0	14	0	0	T	TGME49_297810	850	62	58	18	48	0.015873	0.254237	0.0526316	0.0204082	16.0169	0.387755
TGME49_297880:2282	0	6	0	0	T	TGME49_297880	2282	29	30	26	41	0.0333333	0.225806	0.037037	0.0238095	6.77419	0.642857	0	28	0	62	T	TGME49_297880	2282	111	100	87	119	0.00892857	0.287129	0.0113636	0.525	32.1584	46.2
TGME49_297880:2470	0	7	0	0	T	TGME49_297880	2470	22	43	19	27	0.0434783	0.181818	0.05	0.0357143	4.18182	0.714286	1	8	0	3	T	TGME49_297880	2470	79	58	26	49	0.025	0.152542	0.037037	0.08	6.10169	2.16
TGME49_299050:382	0	12	0	16	T	TGME49_299050	382	98	67	29	86	0.010101	0.191176	0.0333333	0.195402	18.9265	5.86207	6	53	0	4	T	TGME49_299050	382	177	278	127	117	0.0393258	0.193548	0.0078125	0.0423729	4.92166	5.42373
TGME49_299050:430	0	56	3	66	T	TGME49_299050	430	30	90	20	86	0.0322581	0.626374	0.190476	0.770115	19.4176	4.0431	49	206	2	116	T	TGME49_299050	430	575	456	182	206	0.0868056	0.452954	0.0163934	0.565217	5.21803	34.4783
TGME49_299050:458	0	17	0	42	T	TGME49_299050	458	52	66	39	85	0.0188679	0.268657	0.025	0.5	14.2388	20	17	71	68	113	T	TGME49_299050	458	757	475	171	343	0.0237467	0.151261	0.401163	0.331395	6.36975	0.826087
TGME49_299050:472	0	32	0	19	T	TGME49_299050	472	118	108	43	105	0.00840336	0.302752	0.0227273	0.188679	36.0275	8.30189	27	143	1	52	T	TGME49_299050	472	603	647	198	454	0.0463576	0.222222	0.0100503	0.116484	4.79365	11.5901
TGME49_299210:2422	0	11	0	0	T	TGME49_299210	2422	37	37	8	2	0.0263158	0.31579	0.111111	0.333333	12	3	0	17	0	10	T	TGME49_299210	2422	87	117	12	10	0.0113636	0.152542	0.0769231	1	13.4237	13
TGME49_299780:1315	0	8	0	16	T	TGME49_299780	1315	66	39	13	36	0.0149254	0.225	0.0714286	0.45946	15.075	6.43243	0	14	0	0	T	TGME49_299780	1315	28	21	4	103	0.0344828	0.681818	0.2	0.00961539	19.7727	0.0480769
TGME49_299780:1870	0	6	0	0	T	TGME49_299780	1870	35	32	11	19	0.0277778	0.212121	0.0833333	0.05	7.63636	0.6	0	6	0	17	T	TGME49_299780	1870	53	49	3	59	0.0185185	0.14	0.25	0.3	7.56	1.2
TGME49_299780:1874	0	5	0	7	T	TGME49_299780	1874	35	35	7	24	0.0277778	0.166667	0.125	0.32	6	2.56	0	15	0	20	T	TGME49_299780	1874	53	72	3	79	0.0185185	0.219178	0.25	0.2625	11.8356	1.05
TGME49_299780:2746	0	8	0	12	T	TGME49_299780	2746	12	27	20	27	0.0769231	0.321429	0.0476191	0.464286	4.17857	9.75	0	21	0	0	T	TGME49_299780	2746	137	82	2	12	0.00724638	0.26506	0.333333	0.0769231	36.5783	0.230769
TGME49_299780:3179	0	5	2	0	T	TGME49_299780	3179	79	19	27	18	0.0125	0.3	0.107143	0.0526316	24	0.491228	0	8	0	0	T	TGME49_299780	3179	73	60	53	92	0.0135135	0.147541	0.0185185	0.0107527	10.918	0.580645
TGME49_299780:3211	0	8	6	6	T	TGME49_299780	3211	45	50	26	46	0.0217391	0.176471	0.259259	0.148936	8.11765	0.574468	0	10	6	15	T	TGME49_299780	3211	17	51	38	128	0.0555556	0.211538	0.179487	0.124031	3.80769	0.69103
TGME49_300000:2295	0	7	4	11	T	TGME49_300000	2295	15	31	22	48	0.0625	0.25	0.217391	0.244898	4	1.12653	4	19	0	0	T	TGME49_300000	2295	179	93	16	1	0.0277778	0.212766	0.0588235	0.5	7.65957	8.5
TGME49_300000:2340	0	9	0	7	T	TGME49_300000	2340	93	75	11	69	0.0106383	0.131579	0.0833333	0.114286	12.3684	1.37143	0	30	0	40	T	TGME49_300000	2340	93	183	31	150	0.0106383	0.168478	0.03125	0.271523	15.837	8.68874
TGME49_300000:2350	0	44	3	30	T	TGME49_300000	2350	108	136	22	101	0.00917431	0.328467	0.173913	0.303922	35.8029	1.74755	6	78	0	22	T	TGME49_300000	2350	74	221	29	123	0.0933333	0.355856	0.0333333	0.185484	3.81274	5.56452
TGME49_300040:1707	0	5	2	0	T	TGME49_300040	1707	45	19	4	18	0.0217391	0.3	0.6	0.0526316	13.8	0.0877193	0	8	0	0	T	TGME49_300040	1707	28	37	16	45	0.0344828	0.236842	0.0588235	0.0217391	6.86842	0.369565
TGME49_300055:3909	0	6	3	11	T	TGME49_300055	3909	25	33	25	21	0.0384615	0.205882	0.153846	0.545454	5.35294	3.54546	0	8	0	0	T	TGME49_300055	3909	49	59	1	52	0.02	0.15	0.5	0.0188679	7.5	0.0377358
TGME49_300100:1613	0	5	0	0	T	TGME49_300100	1613	21	16	5	24	0.0454546	0.352941	0.166667	0.04	7.76471	0.24	0	19	0	13	T	TGME49_300100	1613	34	37	67	44	0.0285714	0.526316	0.0147059	0.311111	18.4211	21.1556
TGME49_300140:1700	0	9	0	7	T	TGME49_300140	1700	8	20	23	13	0.111111	0.476191	0.0416667	0.571429	4.28571	13.7143	12	38	0	0	T	TGME49_300140	1700	284	208	119	154	0.045614	0.186603	0.00833333	0.00645161	4.09091	0.774194
TGME49_300140:1802	0	6	0	10	T	TGME49_300140	1802	34	18	4	27	0.0285714	0.368421	0.2	0.392857	12.8947	1.96429	0	26	2	41	T	TGME49_300140	1802	252	211	79	173	0.00395257	0.127358	0.0375	0.241379	32.2217	6.43678
TGME49_300140:810	0	16	0	42	T	TGME49_300140	810	8	27	2	70	0.111111	0.607143	0.333333	0.605634	5.46429	1.8169	12	28	1	20	T	TGME49_300140	810	121	66	1	77	0.106557	0.432836	1	0.269231	4.062	0.269231
TGME49_300190:674	0	11	0	1	T	TGME49_300190	674	22	42	12	72	0.0434783	0.27907	0.0769231	0.0273973	6.41861	0.356164	8	64	53	90	T	TGME49_300190	674	562	488	394	272	0.0159858	0.132924	0.136709	0.333333	8.31516	2.43827
TGME49_300190:783	0	11	0	10	T	TGME49_300190	783	136	72	70	75	0.00729927	0.164384	0.0140845	0.144737	22.5206	10.2763	48	474	28	380	T	TGME49_300190	783	1447	1125	615	770	0.0338398	0.421847	0.0470779	0.494163	12.466	10.4967
TGME49_300200:1425	0	6	0	0	T	TGME49_300200	1425	22	35	24	73	0.0434783	0.194444	0.04	0.0135135	4.47222	0.337838	2	30	0	19	T	TGME49_300200	1425	112	193	48	137	0.0265487	0.159794	0.0204082	0.144928	6.0189	7.10145
TGME49_300200:1948	14	57	4	70	T	TGME49_300200	1948	140	101	46	139	0.106383	0.568627	0.106383	0.507143	5.3451	4.76714	29	120	0	112	T	TGME49_300200	1948	311	262	52	183	0.0961538	0.460076	0.0188679	0.61413	4.78479	32.5489
TGME49_300250:1909	0	9	0	8	T	TGME49_300250	1909	12	14	13	28	0.0769231	0.666667	0.0714286	0.310345	8.66667	4.34483	0	6	0	0	T	TGME49_300250	1909	32	22	31	12	0.030303	0.304348	0.03125	0.0769231	10.0435	2.46154
TGME49_301222:6284	0	30	4	18	T	TGME49_301222	6284	277	238	192	282	0.00359712	0.129707	0.0259067	0.0671378	36.0586	2.59152	13	54	1	2	T	TGME49_301222	6284	274	287	102	142	0.0509091	0.190972	0.0194175	0.020979	3.75124	1.08042
TGME49_301250:600	0	8	0	11	T	TGME49_301250	600	38	29	2	46	0.025641	0.3	0.333333	0.255319	11.7	0.765957	0	9	0	0	T	TGME49_301250	600	53	27	18	32	0.0185185	0.357143	0.0526316	0.030303	19.2857	0.575758
TGME49_301440:4256	0	9	0	0	T	TGME49_301440	4256	105	79	37	32	0.00943396	0.125	0.0263158	0.030303	13.25	1.15152	0	17	0	33	T	TGME49_301440	4256	85	81	117	66	0.0116279	0.219512	0.00847458	0.507463	18.878	59.8806
TGME49_301440:5225	1	7	0	11	T	TGME49_301440	5225	51	29	23	48	0.0384615	0.266667	0.0416667	0.244898	6.93333	5.87755	0	13	0	0	T	TGME49_301440	5225	160	92	25	25	0.00621118	0.150538	0.0384615	0.0384615	24.2366	1
TGME49_304500:2274	0	9	2	6	T	TGME49_304500	2274	64	34	14	72	0.0153846	0.285714	0.2	0.0958904	18.5714	0.479452	13	20	0	0	T	TGME49_304500	2274	148	54	101	22	0.0939597	0.381818	0.00980392	0.0434783	4.06364	4.43478
TGME49_304740:1353	0	8	0	2	T	TGME49_304740	1353	19	19	8	7	0.05	0.45	0.111111	0.375	9	3.375	0	8	0	0	T	TGME49_304740	1353	150	42	70	43	0.00662252	0.209302	0.0140845	0.0227273	31.6047	1.61364
TGME49_304740:2157	0	5	0	0	T	TGME49_304740	2157	37	38	7	42	0.0263158	0.153846	0.125	0.0232558	5.84615	0.186047	0	9	0	6	T	TGME49_304740	2157	67	35	19	33	0.0147059	0.277778	0.05	0.205882	18.8889	4.11765
TGME49_304740:2267	0	5	0	0	T	TGME49_304740	2267	29	27	20	19	0.0333333	0.214286	0.0476191	0.05	6.42857	1.05	0	5	0	0	T	TGME49_304740	2267	30	20	50	33	0.0322581	0.285714	0.0196078	0.0294118	8.85714	1.5
TGME49_304955:8269	0	10	2	13	T	TGME49_304955	8269	31	35	20	28	0.03125	0.305556	0.142857	0.482759	9.77778	3.37931	0	9	2	0	T	TGME49_304955	8269	40	32	65	56	0.0243902	0.30303	0.0454545	0.0175439	12.4242	0.385965
TGME49_305250:724	0	8	1	2	T	TGME49_305250	724	20	41	10	12	0.0476191	0.214286	0.181818	0.230769	4.5	1.26923	0	5	0	3	T	TGME49_305250	724	71	42	15	39	0.0138889	0.139535	0.0625	0.1	10.0465	1.6
TGME49_305250:783	0	6	0	1	T	TGME49_305250	783	44	46	8	26	0.0222222	0.148936	0.111111	0.0740741	6.70213	0.666667	0	7	0	6	T	TGME49_305250	783	91	60	1	57	0.0108696	0.131148	0.5	0.12069	12.0656	0.241379
TGME49_305460:1766	0	9	0	0	T	TGME49_305460	1766	57	62	12	2	0.0172414	0.15873	0.0769231	0.333333	9.20635	4.33333	5	25	0	0	T	TGME49_305460	1766	167	69	35	1	0.0357143	0.371429	0.0277778	0.5	10.4	18
TGME49_305460:2305	0	11	0	1	T	TGME49_305460	2305	27	45	19	13	0.0357143	0.26087	0.05	0.142857	7.30435	2.85714	0	10	0	0	T	TGME49_305460	2305	88	59	1	7	0.011236	0.183333	0.5	0.125	16.3167	0.25
TGME49_305520:388	0	34	2	14	T	TGME49_305520	388	48	86	18	73	0.0204082	0.402299	0.157895	0.202703	19.7126	1.28378	41	190	11	43	T	TGME49_305520	388	633	776	329	416	0.0662461	0.245817	0.0363636	0.105516	3.71067	2.90168
TGME49_305520:685	0	18	0	8	T	TGME49_305520	685	40	119	14	134	0.0243902	0.158333	0.0666667	0.0666667	6.49167	1	0	84	0	71	T	TGME49_305520	685	339	621	157	389	0.00294118	0.136656	0.00632911	0.184615	46.463	29.1692
TGME49_305520:798	0	36	1	11	T	TGME49_305520	798	17	91	29	69	0.0555556	0.402174	0.0666667	0.171429	7.23913	2.57143	19	170	19	72	T	TGME49_305520	798	809	679	320	285	0.0246914	0.251471	0.0623053	0.255245	10.1846	4.09668
TGME49_305520:888	0	10	0	6	T	TGME49_305520	888	98	90	7	77	0.010101	0.120879	0.125	0.0897436	11.967	0.717949	18	140	12	76	T	TGME49_305520	888	357	585	111	296	0.0530726	0.240614	0.116071	0.259259	4.53368	2.23362
TGME49_305520:988	0	29	6	33	T	TGME49_305520	988	58	134	26	110	0.0169491	0.222222	0.259259	0.306306	13.1111	1.18147	18	168	0	61	T	TGME49_305520	988	258	605	67	210	0.0733591	0.278878	0.0147059	0.293839	3.80155	19.981
TGME49_306190:2901	0	6	0	1	T	TGME49_306190	2901	89	42	16	30	0.0111111	0.162791	0.0588235	0.0645161	14.6512	1.09677	0	5	36	18	T	TGME49_306190	2901	26	38	57	45	0.037037	0.153846	0.637931	0.413043	4.15385	0.647474
TGME49_306190:3271	0	6	1	0	T	TGME49_306190	3271	29	22	8	9	0.0333333	0.304348	0.222222	0.1	9.13044	0.45	0	7	34	0	T	TGME49_306190	3271	39	40	64	54	0.025	0.195122	0.538462	0.0181818	7.80488	0.0337662
TGME49_306190:3758	0	10	7	14	T	TGME49_306190	3758	63	58	14	35	0.015625	0.186441	0.533333	0.416667	11.9322	0.78125	0	6	38	0	T	TGME49_306190	3758	81	53	56	73	0.0121951	0.12963	0.684211	0.0135135	10.6296	0.0197505
TGME49_306190:754	0	8	0	3	T	TGME49_306190	754	14	26	21	22	0.0666667	0.333333	0.0454546	0.173913	5	3.82609	0	16	0	0	T	TGME49_306190	754	50	39	26	33	0.0196078	0.425	0.037037	0.0294118	21.675	0.794118
TGME49_306390:513	0	5	1	12	T	TGME49_306390	513	21	20	12	38	0.0454546	0.285714	0.153846	0.333333	6.28571	2.16667	0	37	0	24	T	TGME49_306390	513	101	68	45	73	0.00980392	0.550725	0.0217391	0.337838	56.1739	15.5405
TGME49_306600:1179	0	14	1	24	T	TGME49_306600	1179	15	46	25	108	0.0625	0.319149	0.0769231	0.229358	5.10638	2.98165	0	11	0	44	T	TGME49_306600	1179	35	80	63	160	0.0277778	0.148148	0.015625	0.279503	5.33333	17.8882
TGME49_308020:1090	0	10	1	2	T	TGME49_308020	1090	66	56	31	93	0.0149254	0.192983	0.0625	0.0319149	12.9298	0.510638	5	31	0	7	T	TGME49_308020	1090	251	248	71	128	0.0238095	0.128514	0.0138889	0.0620155	5.39759	4.46512
TGME49_308020:1517	0	11	0	1	T	TGME49_308020	1517	64	78	36	89	0.0153846	0.151899	0.027027	0.0222222	9.87342	0.822222	19	106	0	44	T	TGME49_308020	1517	432	599	268	360	0.0461894	0.178333	0.00371747	0.124654	3.86092	33.5319
TGME49_308020:1710	0	7	0	7	T	TGME49_308020	1710	28	51	62	76	0.0344828	0.153846	0.015873	0.103896	4.46154	6.54545	26	141	33	61	T	TGME49_308020	1710	810	841	509	519	0.0332922	0.168646	0.0666667	0.119231	5.06563	1.78846
TGME49_308020:1942	0	9	5	6	T	TGME49_308020	1942	28	35	37	50	0.0344828	0.277778	0.157895	0.137255	8.05556	0.869281	0	8	38	0	T	TGME49_308020	1942	73	71	38	2	0.0135135	0.125	1	0.333333	9.25	0.333333
TGME49_308020:511	0	8	0	1	T	TGME49_308020	511	27	22	2	9	0.0357143	0.391304	0.333333	0.2	10.9565	0.6	0	9	0	0	T	TGME49_308020	511	55	47	44	25	0.0178571	0.208333	0.0222222	0.0384615	11.6667	1.73077
TGME49_308020:905	0	7	0	10	T	TGME49_308020	905	30	56	29	94	0.0322581	0.140351	0.0333333	0.11579	4.35088	3.47368	9	52	19	0	T	TGME49_308020	905	186	276	104	108	0.0534759	0.191336	0.190476	0.00917431	3.57798	0.0481651
TGME49_308090:1436	0	7	0	11	T	TGME49_308090	1436	125	43	21	39	0.00793651	0.181818	0.0454546	0.3	22.9091	6.6	0	11	0	0	T	TGME49_308090	1436	97	68	33	101	0.0102041	0.173913	0.0294118	0.00980392	17.0435	0.333333
TGME49_308090:512	0	9	4	3	T	TGME49_308090	512	20	25	4	25	0.0476191	0.384615	1	0.153846	8.07692	0.153846	0	11	0	0	T	TGME49_308090	512	62	83	54	90	0.015873	0.142857	0.0181818	0.010989	9	0.604396
TGME49_308090:748	0	8	0	0	T	TGME49_308090	748	69	48	7	48	0.0142857	0.183673	0.125	0.0204082	12.8571	0.163265	0	6	0	26	T	TGME49_308090	748	69	26	24	50	0.0142857	0.259259	0.04	0.529412	18.1481	13.2353
TGME49_308090:849	0	5	4	5	T	TGME49_308090	849	34	29	27	26	0.0285714	0.2	0.178571	0.222222	7	1.24444	0	11	0	0	T	TGME49_308090	849	64	35	6	98	0.0153846	0.333333	0.142857	0.010101	21.6667	0.0707071
TGME49_308840:1007	0	11	0	0	T	TGME49_308840	1007	25	48	9	35	0.0384615	0.244898	0.1	0.0277778	6.36735	0.277778	8	27	0	22	T	TGME49_308840	1007	287	182	105	93	0.03125	0.153005	0.00943396	0.244681	4.89617	25.9362
TGME49_308840:1383	0	11	0	21	T	TGME49_308840	1383	31	48	24	49	0.03125	0.244898	0.04	0.44	7.83674	11	0	28	34	22	T	TGME49_308840	1383	193	169	118	108	0.00515464	0.170588	0.294118	0.211009	33.0941	0.717431
TGME49_308840:1535	0	16	0	0	T	TGME49_308840	1535	73	56	9	18	0.0135135	0.298246	0.1	0.0526316	22.0702	0.526316	6	26	40	0	T	TGME49_308840	1535	164	141	127	121	0.0424242	0.190141	0.320312	0.00819672	4.48189	0.0255898
TGME49_308840:1635	0	24	0	6	T	TGME49_308840	1635	120	110	40	94	0.00826446	0.225225	0.0243902	0.0736842	27.2523	3.02105	0	36	0	0	T	TGME49_308840	1635	212	234	66	86	0.00469484	0.157447	0.0149254	0.0114943	33.5362	0.770115
TGME49_308840:517	0	9	4	1	T	TGME49_308840	517	50	78	56	97	0.0196078	0.126582	0.0877193	0.0204082	6.4557	0.232653	1	35	0	13	T	TGME49_308840	517	254	210	119	75	0.00784314	0.170616	0.00833333	0.184211	21.7536	22.1053
TGME49_308860:2525	0	7	0	0	T	TGME49_308860	2525	90	30	40	31	0.010989	0.258064	0.0243902	0.03125	23.4839	1.28125	0	7	0	0	T	TGME49_308860	2525	77	42	19	21	0.0128205	0.186047	0.05	0.0454545	14.5116	0.909091
TGME49_308860:2788	0	7	0	9	T	TGME49_308860	2788	8	18	7	13	0.111111	0.421053	0.125	0.714286	3.78947	5.71429	0	10	0	0	T	TGME49_308860	2788	57	33	1	29	0.0172414	0.323529	0.5	0.0333333	18.7647	0.0666667
TGME49_308970:2156	0	7	0	1	T	TGME49_308970	2156	42	22	1	8	0.0232558	0.347826	0.5	0.222222	14.9565	0.444444	4	12	0	71	T	TGME49_308970	2156	108	69	12	95	0.0458716	0.185714	0.0769231	0.75	4.04857	9.75
TGME49_308970:2611	0	6	0	0	T	TGME49_308970	2611	40	22	19	31	0.0243902	0.304348	0.05	0.03125	12.4783	0.625	0	25	22	34	T	TGME49_308970	2611	97	70	40	63	0.0102041	0.366197	0.560976	0.546875	35.8873	0.974864
TGME49_309120:1194	0	7	1	10	T	TGME49_309120	1194	28	42	17	43	0.0344828	0.186047	0.111111	0.25	5.39535	2.25	0	28	3	39	T	TGME49_309120	1194	273	157	104	83	0.00364964	0.183544	0.0380952	0.47619	50.2911	12.5
TGME49_309120:1527	0	19	0	7	T	TGME49_309120	1527	95	82	22	26	0.0104167	0.240964	0.0434783	0.296296	23.1325	6.81482	42	256	0	216	T	TGME49_309120	1527	852	1103	127	634	0.0504103	0.23279	0.0078125	0.341732	4.6179	43.7417
TGME49_309210:1501	0	11	0	1	T	TGME49_309210	1501	12	42	21	21	0.0769231	0.27907	0.0454546	0.0909091	3.62791	2	2	38	14	9	T	TGME49_309210	1501	113	149	25	88	0.0263158	0.26	0.576923	0.11236	9.88	0.194757
TGME49_309210:1582	0	13	0	20	T	TGME49_309210	1582	39	58	14	39	0.025	0.237288	0.0666667	0.525	9.49152	7.875	15	60	14	35	T	TGME49_309210	1582	457	412	241	203	0.0349345	0.1477	0.0619835	0.176471	4.22791	2.84706
TGME49_309210:1823	0	8	0	0	T	TGME49_309210	1823	36	41	12	15	0.027027	0.214286	0.0769231	0.0625	7.92857	0.8125	0	13	1	17	T	TGME49_309210	1823	310	90	29	82	0.00321543	0.153846	0.0666667	0.216867	47.8462	3.25301
TGME49_309590:2218	0	27	0	15	T	TGME49_309590	2218	254	171	78	84	0.00392157	0.162791	0.0126582	0.188235	41.5116	14.8706	17	123	26	94	T	TGME49_309590	2218	875	884	403	872	0.0205479	0.140113	0.0668317	0.10882	6.81883	1.62827
TGME49_309590:2947	1	72	6	31	T	TGME49_309590	2947	196	366	107	278	0.0101523	0.19891	0.0648148	0.114695	19.5926	1.76958	0	41	2	0	T	TGME49_309590	2947	119	207	74	60	0.00833333	0.201923	0.04	0.0163934	24.2308	0.409836
TGME49_309590:87	0	5	0	0	T	TGME49_309590	87	47	34	16	30	0.0208333	0.171429	0.0588235	0.0322581	8.22857	0.548387	0	12	0	14	T	TGME49_309590	87	88	82	120	80	0.011236	0.156627	0.00826446	0.185185	13.9398	22.4074
TGME49_309600:2034	0	5	3	3	T	TGME49_309600	2034	48	29	10	18	0.0204082	0.2	0.363636	0.210526	9.8	0.578947	0	6	70	0	T	TGME49_309600	2034	63	28	93	17	0.015625	0.241379	0.755319	0.0555556	15.4483	0.0735524
TGME49_309600:2476	0	6	0	1	T	TGME49_309600	2476	36	26	16	30	0.027027	0.259259	0.0588235	0.0645161	9.59259	1.09677	0	13	0	0	T	TGME49_309600	2476	33	57	8	44	0.0294118	0.241379	0.111111	0.0222222	8.2069	0.2
TGME49_309600:622	0	8	0	0	T	TGME49_309600	622	10	21	4	8	0.0909091	0.409091	0.2	0.111111	4.5	0.555556	0	12	0	18	T	TGME49_309600	622	99	68	29	18	0.01	0.188406	0.0333333	1	18.8406	30
TGME49_309600:712	0	30	9	16	T	TGME49_309600	712	30	36	13	29	0.0322581	0.837838	0.714286	0.566667	25.973	0.793333	13	60	0	52	T	TGME49_309600	712	156	140	2	142	0.089172	0.432624	0.333333	0.370629	4.85157	1.11189
TGME49_309730:1338	0	6	1	0	T	TGME49_309730	1338	22	23	7	16	0.0434783	0.291667	0.25	0.0588235	6.70833	0.235294	0	5	19	8	T	TGME49_309730	1338	33	37	54	8	0.0294118	0.157895	0.363636	1	5.36842	2.75
TGME49_309730:403	0	7	1	5	T	TGME49_309730	403	23	21	1	8	0.0416667	0.363636	1	0.666667	8.72727	0.666667	0	9	0	25	T	TGME49_309730	403	36	18	37	25	0.027027	0.526316	0.0263158	1	19.4737	38
TGME49_309760:1154	0	6	3	4	T	TGME49_309760	1154	26	40	24	29	0.037037	0.170732	0.16	0.166667	4.60976	1.04167	2	11	0	0	T	TGME49_309760	1154	112	74	46	32	0.0265487	0.16	0.0212766	0.030303	6.02667	1.42424
TGME49_309760:1305	0	6	0	3	T	TGME49_309760	1305	34	39	6	43	0.0285714	0.175	0.142857	0.0909091	6.125	0.636364	0	9	0	0	T	TGME49_309760	1305	64	76	41	62	0.0153846	0.12987	0.0238095	0.015873	8.44156	0.666667
TGME49_309760:1626	0	9	0	9	T	TGME49_309760	1626	20	22	1	30	0.0476191	0.434783	0.5	0.322581	9.13044	0.645161	0	10	0	0	T	TGME49_309760	1626	47	40	42	43	0.0208333	0.268293	0.0232558	0.0227273	12.878	0.977273
TGME49_309760:2581	0	5	0	1	T	TGME49_309760	2581	73	48	27	70	0.0135135	0.122449	0.0357143	0.028169	9.06122	0.788732	0	7	0	0	T	TGME49_309760	2581	98	56	9	62	0.010101	0.140351	0.1	0.015873	13.8947	0.15873
TGME49_309760:876	0	6	6	9	T	TGME49_309760	876	9	14	13	10	0.1	0.466667	0.5	0.909091	4.66667	1.81818	0	5	0	0	T	TGME49_309760	876	36	20	3	27	0.027027	0.285714	0.25	0.0357143	10.5714	0.142857
TGME49_309760:920	0	5	0	1	T	TGME49_309760	920	50	41	7	36	0.0196078	0.142857	0.125	0.054054	7.28571	0.432432	1	9	0	0	T	TGME49_309760	920	82	60	36	51	0.0240964	0.163934	0.027027	0.0192308	6.80328	0.711538
TGME49_309810:218	0	26	1	20	T	TGME49_309810	218	76	171	27	155	0.012987	0.156977	0.0714286	0.134615	12.0872	1.88461	77	279	0	90	T	TGME49_309810	218	988	815	156	510	0.0788675	0.343137	0.00636943	0.178082	4.3508	27.9589
TGME49_309810:319	0	27	1	48	T	TGME49_309810	319	77	113	37	119	0.0128205	0.245614	0.0526316	0.408333	19.1579	7.75833	25	138	0	78	T	TGME49_309810	319	513	497	87	435	0.0505837	0.279116	0.0113636	0.181193	5.51792	15.945
TGME49_309810:681	0	59	3	45	T	TGME49_309810	681	116	160	75	122	0.00854701	0.372671	0.0526316	0.373984	43.6025	7.10569	30	157	0	70	T	TGME49_309810	681	599	364	152	261	0.0516667	0.432877	0.00653595	0.270992	8.37826	41.4618
TGME49_309820:144	0	14	0	0	T	TGME49_309820	144	41	42	24	12	0.0238095	0.348837	0.04	0.0769231	14.6512	1.92308	0	17	15	0	T	TGME49_309820	144	71	131	61	75	0.0138889	0.136364	0.258065	0.0131579	9.81818	0.0509868
TGME49_309820:526	0	10	0	13	T	TGME49_309820	526	36	68	29	85	0.027027	0.15942	0.0333333	0.162791	5.89855	4.88372	0	26	0	1	T	TGME49_309820	526	191	210	81	92	0.00520833	0.127962	0.0121951	0.0215054	24.5687	1.76344
TGME49_309820:904	0	11	2	2	T	TGME49_309820	904	28	85	21	71	0.0344828	0.139535	0.136364	0.0416667	4.04651	0.305556	21	29	1	34	T	TGME49_309820	904	610	173	110	101	0.0360065	0.172414	0.018018	0.343137	4.7884	19.0441
TGME49_310030:367	0	13	0	17	T	TGME49_310030	367	60	86	28	129	0.0163934	0.160919	0.0344828	0.138461	9.81609	4.01539	0	18	0	0	T	TGME49_310030	367	70	110	1	82	0.0140845	0.171171	0.5	0.0120482	12.1532	0.0240964
TGME49_310040:836	0	10	0	9	T	TGME49_310040	836	26	38	28	40	0.037037	0.282051	0.0344828	0.243902	7.61538	7.07317	9	62	0	26	T	TGME49_310040	836	268	240	6	123	0.0371747	0.261411	0.142857	0.217742	7.03195	1.52419
TGME49_310040:957	0	5	0	0	T	TGME49_310040	957	47	23	3	29	0.0208333	0.25	0.25	0.0333333	12	0.133333	0	16	0	0	T	TGME49_310040	957	25	84	36	56	0.0384615	0.2	0.027027	0.0175439	5.2	0.649123
TGME49_310150:1269	0	6	0	0	T	TGME49_310150	1269	26	22	5	5	0.037037	0.304348	0.166667	0.166667	8.21739	1	0	18	0	0	T	TGME49_310150	1269	89	105	44	34	0.0111111	0.179245	0.0222222	0.0285714	16.1321	1.28571
TGME49_310470:687	0	11	0	1	T	TGME49_310470	687	20	28	18	6	0.0476191	0.413793	0.0526316	0.285714	8.68966	5.42857	0	5	0	0	T	TGME49_310470	687	53	39	23	5	0.0185185	0.15	0.0416667	0.166667	8.1	4
TGME49_310490:578	1	51	5	49	T	TGME49_310490	578	232	222	103	203	0.00858369	0.233184	0.0576923	0.245098	27.1659	4.24837	22	214	0	53	T	TGME49_310490	578	482	877	128	464	0.047619	0.244875	0.00775194	0.116129	5.14237	14.9806
TGME49_310490:691	0	14	7	18	T	TGME49_310490	691	85	78	97	80	0.0116279	0.189873	0.0816327	0.234568	16.3291	2.87346	5	65	0	0	T	TGME49_310490	691	571	348	103	148	0.0104895	0.189112	0.00961539	0.00671141	18.0287	0.697987
TGME49_310490:706	0	43	5	57	T	TGME49_310490	706	93	135	59	150	0.0106383	0.323529	0.1	0.384106	30.4118	3.84106	30	123	20	37	T	TGME49_310490	706	705	413	147	217	0.0439093	0.299517	0.141892	0.174312	6.82126	1.22848
TGME49_310490:759	0	45	9	22	T	TGME49_310490	759	12	154	56	66	0.0769231	0.296774	0.175439	0.343284	3.85806	1.95672	37	123	1	65	T	TGME49_310490	759	785	686	317	234	0.0483461	0.180495	0.00628931	0.280851	3.73339	44.6553
TGME49_310490:802	0	24	0	18	T	TGME49_310490	802	148	155	51	113	0.00671141	0.160256	0.0192308	0.166667	23.8782	8.66667	20	99	0	9	T	TGME49_310490	802	314	356	103	94	0.0666667	0.280112	0.00961539	0.105263	4.20168	10.9474
TGME49_310640:1512	0	5	0	0	T	TGME49_310640	1512	20	18	18	39	0.0476191	0.31579	0.0526316	0.025	6.63158	0.475	3	28	0	0	T	TGME49_310640	1512	89	65	9	22	0.0444444	0.439394	0.1	0.0434783	9.88636	0.434783
TGME49_310640:2253	0	5	0	0	T	TGME49_310640	2253	40	40	7	34	0.0243902	0.146342	0.125	0.0285714	6	0.228571	0	8	0	0	T	TGME49_310640	2253	32	66	31	71	0.030303	0.134328	0.03125	0.0138889	4.43284	0.444444
TGME49_310700:2236	0	8	0	0	T	TGME49_310700	2236	15	24	4	23	0.0625	0.36	0.2	0.0416667	5.76	0.208333	3	10	31	0	T	TGME49_310700	2236	44	16	31	1	0.0888889	0.647059	1	0.5	7.27941	0.5
TGME49_310780:1069	0	23	9	12	T	TGME49_310780	1069	176	122	75	120	0.00564972	0.195122	0.131579	0.107438	34.5366	0.816529	26	78	68	90	T	TGME49_310780	1069	617	372	374	608	0.0436893	0.211796	0.184	0.149425	4.84778	0.812094
TGME49_310780:1467	0	35	0	28	T	TGME49_310780	1467	115	130	53	102	0.00862069	0.274809	0.0185185	0.281553	31.8779	15.2039	5	57	0	7	T	TGME49_310780	1467	384	239	137	100	0.0155844	0.241667	0.00724638	0.0792079	15.5069	10.9307
TGME49_310780:1471	7	63	16	19	T	TGME49_310780	1471	167	212	62	121	0.0476191	0.30047	0.269841	0.163934	6.30986	0.607522	31	136	1	11	T	TGME49_310780	1471	396	426	100	101	0.0806045	0.320843	0.019802	0.117647	3.98046	5.94118
TGME49_310780:1579	8	49	7	63	T	TGME49_310780	1579	174	264	76	236	0.0514286	0.188679	0.103896	0.270042	3.66876	2.59916	12	74	37	21	T	TGME49_310780	1579	359	357	231	180	0.0361111	0.209497	0.163793	0.121547	5.80146	0.742076
TGME49_310780:433	0	16	0	11	T	TGME49_310780	433	92	120	46	86	0.0107527	0.140496	0.0212766	0.137931	13.0661	6.48276	27	101	28	39	T	TGME49_310780	433	661	526	412	449	0.0422961	0.193548	0.0702179	0.0888889	4.57604	1.2659
TGME49_310780:510	14	36	7	37	T	TGME49_310780	510	244	137	77	162	0.0612245	0.268116	0.102564	0.233129	4.37923	2.27301	7	116	10	122	T	TGME49_310780	510	813	707	305	739	0.00982801	0.165254	0.0359477	0.166216	16.8146	4.62383
TGME49_310780:659	1	27	0	4	T	TGME49_310780	659	33	133	63	95	0.0588235	0.208955	0.015625	0.0520833	3.55224	3.33333	6	101	1	97	T	TGME49_310780	659	631	460	323	310	0.0110759	0.221258	0.00617284	0.315113	19.9764	51.0482
TGME49_310780:945	0	13	4	15	T	TGME49_310780	945	88	101	51	95	0.011236	0.137255	0.0961538	0.166667	12.2157	1.73333	0	66	0	80	T	TGME49_310780	945	440	501	141	645	0.00226757	0.133466	0.00704225	0.125387	58.8586	17.805
TGME49_310790:1543	0	18	0	7	T	TGME49_310790	1543	40	55	31	49	0.0243902	0.339286	0.03125	0.16	13.9107	5.12	0	25	44	23	T	TGME49_310790	1543	82	88	67	127	0.0120482	0.292135	0.661765	0.1875	24.2472	0.283333
TGME49_310790:1582	0	5	0	1	T	TGME49_310790	1582	58	39	14	44	0.0169491	0.15	0.0666667	0.0444444	8.85	0.666667	0	12	0	18	T	TGME49_310790	1582	53	84	16	57	0.0185185	0.152941	0.0588235	0.327586	8.25882	5.56897
TGME49_310790:1750	0	10	2	1	T	TGME49_310790	1750	30	43	37	80	0.0322581	0.25	0.0789474	0.0246914	7.75	0.312757	0	24	0	2	T	TGME49_310790	1750	119	117	61	46	0.00833333	0.211864	0.016129	0.0638298	25.4237	3.95745
TGME49_311010:782	0	15	0	1	T	TGME49_311010	782	15	28	4	4	0.0625	0.551724	0.2	0.4	8.82759	2	0	17	0	14	T	TGME49_311010	782	60	34	1	80	0.0163934	0.514286	0.5	0.185185	31.3714	0.37037
TGME49_311100:1362	0	11	0	2	T	TGME49_311100	1362	16	34	13	4	0.0588235	0.342857	0.0714286	0.6	5.82857	8.4	0	6	0	0	T	TGME49_311100	1362	13	22	27	64	0.0714286	0.304348	0.0357143	0.0153846	4.26087	0.430769
TGME49_311240:3068	0	5	0	0	T	TGME49_311240	3068	10	17	4	15	0.0909091	0.333333	0.2	0.0625	3.66667	0.3125	0	6	0	0	T	TGME49_311240	3068	28	42	12	24	0.0344828	0.162791	0.0769231	0.04	4.72093	0.52
TGME49_311470:6711	0	6	0	1	T	TGME49_311470	6711	17	17	13	23	0.0555556	0.388889	0.0714286	0.0833333	7	1.16667	0	10	6	3	T	TGME49_311470	6711	21	39	20	13	0.0454545	0.275	0.333333	0.285714	6.05	0.857143
TGME49_311720:131	0	12	0	0	T	TGME49_311720	131	70	25	5	26	0.0140845	0.5	0.166667	0.037037	35.5	0.222222	8	15	0	0	T	TGME49_311720	131	221	83	200	83	0.0405405	0.190476	0.00497512	0.0119048	4.69841	2.39286
TGME49_311720:2683	0	9	0	2	T	TGME49_311720	2683	15	38	62	61	0.0625	0.25641	0.015873	0.0483871	4.10256	3.04839	0	8	0	0	T	TGME49_311720	2683	50	47	80	24	0.0196078	0.1875	0.0123457	0.04	9.5625	3.24
TGME49_311840:328	0	5	0	0	T	TGME49_311840	328	14	19	3	15	0.0666667	0.3	0.25	0.0625	4.5	0.25	0	7	0	0	T	TGME49_311840	328	34	11	20	18	0.0285714	0.666667	0.047619	0.0526316	23.3333	1.10526
TGME49_312090:353	16	68	0	89	T	TGME49_312090	353	119	124	34	128	0.141667	0.552	0.0285714	0.697674	3.89647	24.4186	20	394	0	185	T	TGME49_312090	353	133	583	1	257	0.156716	0.67637	0.5	0.72093	4.31588	1.44186
TGME49_312090:558	0	17	0	14	T	TGME49_312090	558	83	129	92	235	0.0119048	0.138461	0.0107527	0.0635593	11.6308	5.91102	72	174	0	98	T	TGME49_312090	558	789	439	176	250	0.0924051	0.397727	0.00564972	0.394422	4.30417	69.8127
TGME49_312090:576	4	79	3	90	T	TGME49_312090	576	54	201	55	229	0.0909091	0.39604	0.0714286	0.395652	4.35644	5.53913	81	303	86	271	T	TGME49_312090	576	800	786	383	459	0.102372	0.386277	0.226562	0.591304	3.77327	2.6099
TGME49_312090:643	0	11	0	0	T	TGME49_312090	643	44	62	28	38	0.0222222	0.190476	0.0344828	0.025641	8.57143	0.74359	0	22	0	0	T	TGME49_312090	643	155	117	56	127	0.00641026	0.194915	0.0175439	0.0078125	30.4068	0.445312
TGME49_312600:169	0	7	11	3	T	TGME49_312600	169	30	30	15	47	0.0322581	0.258064	0.75	0.0833333	8	0.111111	0	9	15	0	T	TGME49_312600	169	167	82	177	95	0.00595238	0.120482	0.0898876	0.0104167	20.241	0.115885
TGME49_312600:319	0	5	0	1	T	TGME49_312600	319	40	30	17	18	0.0243902	0.193548	0.0555556	0.105263	7.93548	1.89474	0	9	0	0	T	TGME49_312600	319	71	80	3	74	0.0138889	0.123457	0.25	0.0133333	8.88889	0.0533333
TGME49_312600:417	0	8	1	26	T	TGME49_312600	417	23	34	26	69	0.0416667	0.257143	0.0740741	0.385714	6.17143	5.20714	1	29	0	17	T	TGME49_312600	417	139	140	77	98	0.0142857	0.212766	0.0128205	0.181818	14.8936	14.1818
TGME49_312600:741	0	5	0	2	T	TGME49_312600	741	45	39	4	65	0.0217391	0.15	0.2	0.0454546	6.9	0.227273	0	20	0	0	T	TGME49_312600	741	162	86	35	97	0.00613497	0.241379	0.0277778	0.0102041	39.3448	0.367347
TGME49_312600:885	7	15	3	18	T	TGME49_312600	885	114	51	55	61	0.0695652	0.307692	0.0714286	0.306452	4.42308	4.29032	0	13	0	45	T	TGME49_312600	885	71	61	16	74	0.0138889	0.225806	0.0588235	0.613333	16.2581	10.4267
TGME49_313140:1122	0	8	5	0	T	TGME49_313140	1122	12	14	8	12	0.0769231	0.6	0.666667	0.0769231	7.8	0.115385	0	18	0	22	T	TGME49_313140	1122	25	39	44	44	0.0384615	0.475	0.0222222	0.511111	12.35	23
TGME49_313390:1466	0	98	12	66	T	TGME49_313390	1466	41	199	38	114	0.0238095	0.495	0.333333	0.582609	20.79	1.74783	27	580	4	384	T	TGME49_313390	1466	1540	1689	837	1159	0.01817	0.343787	0.00596659	0.331897	18.9206	55.6259
TGME49_313390:1734	0	6	0	10	T	TGME49_313390	1734	50	49	44	84	0.0196078	0.14	0.0222222	0.129412	7.14	5.82353	25	56	14	31	T	TGME49_313390	1734	641	366	129	113	0.0404984	0.155313	0.115385	0.280702	3.83505	2.43275
TGME49_313910:1451	0	32	0	25	T	TGME49_313910	1451	34	65	29	47	0.0285714	0.5	0.0333333	0.541667	17.5	16.25	0	18	0	10	T	TGME49_313910	1451	38	29	66	30	0.025641	0.633333	0.0149254	0.354839	24.7	23.7742
TGME49_313910:1660	0	14	2	32	T	TGME49_313910	1660	72	85	15	68	0.0136986	0.174419	0.1875	0.478261	12.7326	2.55072	0	27	0	43	T	TGME49_313910	1660	97	175	63	153	0.0102041	0.159091	0.015625	0.285714	15.5909	18.2857
TGME49_313910:1991	0	8	0	2	T	TGME49_313910	1991	70	64	27	56	0.0140845	0.138461	0.0357143	0.0526316	9.83077	1.47368	1	11	0	21	T	TGME49_313910	1991	163	49	42	27	0.0121951	0.24	0.0232558	0.785714	19.68	33.7857
TGME49_313910:2305	0	8	0	0	T	TGME49_313910	2305	41	40	3	22	0.0238095	0.219512	0.25	0.0434783	9.21951	0.173913	0	8	0	0	T	TGME49_313910	2305	82	38	65	50	0.0120482	0.230769	0.0151515	0.0196078	19.1538	1.29412
TGME49_313910:2377	0	6	0	8	T	TGME49_313910	2377	28	33	39	43	0.0344828	0.205882	0.025	0.204545	5.97059	8.18182	0	13	0	33	T	TGME49_313910	2377	81	59	66	67	0.0121951	0.233333	0.0149254	0.5	19.1333	33.5
TGME49_313910:2967	0	16	0	5	T	TGME49_313910	2967	15	53	13	34	0.0625	0.314815	0.0714286	0.171429	5.03704	2.4	1	22	0	31	T	TGME49_313910	2967	103	125	43	151	0.0192308	0.18254	0.0227273	0.210526	9.49206	9.26316
TGME49_313910:3198	0	13	0	12	T	TGME49_313910	3198	53	84	24	85	0.0185185	0.164706	0.04	0.151163	8.89412	3.77907	4	38	8	0	T	TGME49_313910	3198	84	155	55	81	0.0588235	0.25	0.160714	0.0121951	4.25	0.0758808
TGME49_313910:3440	0	6	0	1	T	TGME49_313910	3440	23	27	12	34	0.0416667	0.25	0.0769231	0.0571429	6	0.742857	0	17	0	0	T	TGME49_313910	3440	77	67	31	34	0.0128205	0.264706	0.03125	0.0285714	20.6471	0.914286
TGME49_313910:4058	0	12	0	3	T	TGME49_313910	4058	103	53	4	35	0.00961539	0.240741	0.2	0.111111	25.037	0.555556	0	7	0	0	T	TGME49_313910	4058	22	29	85	12	0.0434783	0.266667	0.0116279	0.0769231	6.13333	6.61538
TGME49_313910:4164	0	17	0	4	T	TGME49_313910	4164	59	57	32	74	0.0166667	0.310345	0.030303	0.0666667	18.6207	2.2	0	18	0	50	T	TGME49_313910	4164	95	89	39	186	0.0104167	0.211111	0.025	0.272727	20.2667	10.9091
TGME49_313910:4218	0	6	0	2	T	TGME49_313910	4218	40	43	23	75	0.0243902	0.159091	0.0416667	0.0394737	6.52273	0.947368	1	7	0	14	T	TGME49_313910	4218	62	36	25	49	0.031746	0.216216	0.0384615	0.3	6.81081	7.8
TGME49_313910:5104	0	16	0	5	T	TGME49_313910	5104	31	63	28	38	0.03125	0.265625	0.0344828	0.153846	8.5	4.46154	0	16	0	0	T	TGME49_313910	5104	105	106	105	84	0.00943396	0.158879	0.00943396	0.0117647	16.8411	1.24706
TGME49_313910:5530	0	8	0	5	T	TGME49_313910	5530	29	47	16	55	0.0333333	0.1875	0.0588235	0.107143	5.625	1.82143	0	6	0	0	T	TGME49_313910	5530	121	46	149	34	0.00819672	0.148936	0.00666667	0.0285714	18.1702	4.28571
TGME49_313910:5673	0	16	1	2	T	TGME49_313910	5673	53	70	32	53	0.0185185	0.239437	0.0606061	0.0555556	12.9296	0.916667	0	8	0	0	T	TGME49_313910	5673	41	74	107	39	0.0238095	0.12	0.00925926	0.025	5.04	2.7
TGME49_313910:5734	0	6	0	9	T	TGME49_313910	5734	49	44	27	69	0.02	0.155556	0.0357143	0.142857	7.77778	4	0	14	0	0	T	TGME49_313910	5734	80	61	33	79	0.0123457	0.241935	0.0294118	0.0125	19.5968	0.425
TGME49_314260:637	0	40	1	30	T	TGME49_314260	637	16	59	13	45	0.0588235	0.683333	0.142857	0.673913	11.6167	4.71739	3	16	0	0	T	TGME49_314260	637	68	43	27	116	0.057971	0.386364	0.0357143	0.00854701	6.66477	0.239316
TGME49_314260:855	0	41	13	5	T	TGME49_314260	855	19	55	15	15	0.05	0.75	0.875	0.375	15	0.428571	0	51	14	56	T	TGME49_314260	855	63	76	28	112	0.015625	0.675325	0.517241	0.504425	43.2208	0.975221
TGME49_314430:2962	0	6	0	0	T	TGME49_314430	2962	37	37	4	31	0.0263158	0.18421	0.2	0.03125	7	0.15625	0	6	0	0	T	TGME49_314430	2962	24	35	33	47	0.04	0.194444	0.0294118	0.0208333	4.86111	0.708333
TGME49_314430:3699	0	8	0	2	T	TGME49_314430	3699	16	30	17	14	0.0588235	0.290323	0.0555556	0.2	4.93548	3.6	0	8	0	12	T	TGME49_314430	3699	30	33	51	46	0.0322581	0.264706	0.0192308	0.276596	8.20588	14.383
TGME49_314450:1680	0	6	0	0	T	TGME49_314450	1680	8	17	2	2	0.111111	0.388889	0.333333	0.333333	3.5	1	2	32	0	26	T	TGME49_314450	1680	111	68	40	84	0.0267857	0.478261	0.0243902	0.317647	17.8551	13.0235
TGME49_314810:1049	0	38	0	30	T	TGME49_314810	1049	13	124	55	142	0.0714286	0.312	0.0178571	0.216783	4.368	12.1399	26	143	2	90	T	TGME49_314810	1049	364	421	184	181	0.0739726	0.341232	0.0162162	0.5	4.61295	30.8333
TGME49_314810:444	0	25	5	35	T	TGME49_314810	444	31	73	30	85	0.03125	0.351351	0.193548	0.418605	11.2432	2.16279	9	20	0	46	T	TGME49_314810	444	396	126	119	119	0.0251889	0.165354	0.00833333	0.391667	6.56457	47
TGME49_314810:706	0	19	9	3	T	TGME49_314810	706	37	52	42	37	0.0263158	0.377358	0.232558	0.105263	14.3396	0.452632	0	16	0	14	T	TGME49_314810	706	170	140	23	76	0.00584795	0.120567	0.0416667	0.194805	20.617	4.67532
TGME49_315210:3063	1	18	1	5	T	TGME49_315210	3063	50	35	14	19	0.0392157	0.527778	0.133333	0.3	13.4583	2.25	0	7	0	0	T	TGME49_315210	3063	24	7	55	37	0.04	1	0.0178571	0.0263158	25	1.47368
TGME49_315210:3078	0	7	0	8	T	TGME49_315210	3078	39	45	5	38	0.025	0.173913	0.166667	0.230769	6.95652	1.38461	0	9	0	9	T	TGME49_315210	3078	34	16	12	71	0.0285714	0.588235	0.0769231	0.138889	20.5882	1.80556
TGME49_315320:1223	0	5	1	12	T	TGME49_315320	1223	67	42	13	43	0.0147059	0.139535	0.142857	0.295455	9.48837	2.06818	2	15	24	31	T	TGME49_315320	1223	77	91	24	65	0.0384615	0.173913	1	0.484848	4.52174	0.484848
TGME49_315320:1377	0	6	0	4	T	TGME49_315320	1377	25	33	31	20	0.0384615	0.205882	0.03125	0.238095	5.35294	7.61905	0	11	0	0	T	TGME49_315320	1377	72	37	39	82	0.0136986	0.315789	0.025	0.0120482	23.0526	0.481928
TGME49_315320:1689	0	6	0	0	T	TGME49_315320	1689	66	55	12	44	0.0149254	0.125	0.0769231	0.0222222	8.375	0.288889	0	23	0	0	T	TGME49_315320	1689	36	124	47	144	0.027027	0.192	0.0208333	0.00689655	7.104	0.331034
TGME49_315320:1754	0	15	0	5	T	TGME49_315320	1754	36	48	9	44	0.027027	0.326531	0.1	0.133333	12.0816	1.33333	0	19	0	12	T	TGME49_315320	1754	151	134	123	58	0.00657895	0.148148	0.00806452	0.220339	22.5185	27.322
TGME49_315320:1868	0	6	0	14	T	TGME49_315320	1868	43	38	34	61	0.0227273	0.179487	0.0285714	0.241935	7.89744	8.46774	0	12	0	0	T	TGME49_315320	1868	86	93	3	40	0.0114943	0.138298	0.25	0.0243902	12.0319	0.097561
TGME49_315320:378	0	7	0	0	T	TGME49_315320	378	31	53	17	49	0.03125	0.148148	0.0555556	0.02	4.74074	0.36	0	9	0	50	T	TGME49_315320	378	88	73	49	122	0.011236	0.135135	0.02	0.414634	12.027	20.7317
TGME49_315320:403	0	12	8	11	T	TGME49_315320	403	27	71	15	85	0.0357143	0.180556	0.5625	0.139535	5.05556	0.248062	0	16	0	0	T	TGME49_315320	403	127	110	100	30	0.0078125	0.153153	0.00990099	0.0322581	19.6036	3.25806
TGME49_315490:1122	0	5	0	0	T	TGME49_315490	1122	27	16	2	4	0.0357143	0.352941	0.333333	0.2	9.88235	0.6	0	5	0	0	T	TGME49_315490	1122	33	8	7	17	0.0294118	0.666667	0.125	0.0555556	22.6667	0.444444
TGME49_315610:1993	0	6	4	7	T	TGME49_315610	1993	18	12	5	48	0.0526316	0.538462	0.833333	0.163265	10.2308	0.195918	0	9	0	43	T	TGME49_315610	1993	38	49	60	87	0.025641	0.2	0.0163934	0.5	7.8	30.5
TGME49_316250:1408	0	17	0	9	T	TGME49_316250	1408	35	37	9	36	0.0277778	0.473684	0.1	0.27027	17.0526	2.7027	6	21	33	56	T	TGME49_316250	1408	113	58	55	106	0.0614035	0.372881	0.607143	0.53271	6.07264	0.877405
TGME49_316250:198	0	9	2	9	T	TGME49_316250	198	75	45	43	78	0.0131579	0.217391	0.0681818	0.126582	16.5217	1.85654	1	19	15	49	T	TGME49_316250	198	149	93	23	90	0.0133333	0.212766	0.666667	0.549451	15.9574	0.824176
TGME49_316250:2824	0	12	0	2	T	TGME49_316250	2824	37	27	9	25	0.0263158	0.464286	0.1	0.115385	17.6429	1.15385	0	10	0	0	T	TGME49_316250	2824	79	37	41	51	0.0125	0.289474	0.0238095	0.0192308	23.1579	0.807692
TGME49_316250:536	0	9	0	11	T	TGME49_316250	536	18	30	18	70	0.0526316	0.322581	0.0526316	0.169014	6.12903	3.21127	0	13	0	0	T	TGME49_316250	536	93	93	12	79	0.0106383	0.148936	0.0769231	0.0125	14	0.1625
TGME49_316250:566	0	15	4	23	T	TGME49_316250	566	13	57	9	68	0.0714286	0.275862	0.5	0.347826	3.86207	0.695652	0	21	0	13	T	TGME49_316250	566	125	106	65	130	0.00793651	0.205607	0.0151515	0.10687	25.9065	7.05344
TGME49_316250:883	1	21	0	7	T	TGME49_316250	883	62	63	16	47	0.031746	0.34375	0.0588235	0.166667	10.8281	2.83333	0	25	5	4	T	TGME49_316250	883	112	139	32	15	0.00884956	0.185714	0.181818	0.3125	20.9857	1.71875
TGME49_316310:1322	0	9	2	7	T	TGME49_316310	1322	97	80	101	120	0.0102041	0.123457	0.0294118	0.0661157	12.0988	2.24793	0	11	0	0	T	TGME49_316310	1322	48	45	28	95	0.0204082	0.26087	0.0344828	0.0104167	12.7826	0.302083
TGME49_316310:1435	0	24	1	12	T	TGME49_316310	1435	31	113	49	106	0.03125	0.219298	0.04	0.121495	7.01754	3.03738	0	43	0	36	T	TGME49_316310	1435	311	329	275	339	0.00320513	0.133333	0.00362319	0.108824	41.6	30.0353
TGME49_316310:2174	0	14	0	11	T	TGME49_316310	2174	117	117	20	74	0.00847458	0.127119	0.0476191	0.16	15	3.36	27	78	24	14	T	TGME49_316310	2174	414	298	460	287	0.0674699	0.264214	0.0542299	0.0520833	3.91603	0.960417
TGME49_316310:2182	0	26	0	18	T	TGME49_316310	2182	92	111	17	64	0.0107527	0.241071	0.0555556	0.292308	22.4196	5.26154	0	70	0	39	T	TGME49_316310	2182	302	346	210	312	0.00330033	0.204611	0.00473934	0.127796	61.9971	26.9649
TGME49_316310:2222	2	14	2	12	T	TGME49_316310	2222	77	39	18	40	0.0384615	0.375	0.157895	0.317073	9.75	2.00813	3	19	0	0	T	TGME49_316310	2222	149	90	123	33	0.0266667	0.21978	0.00806452	0.0294118	8.24176	3.64706
TGME49_316400:112	0	19	1	1	T	TGME49_316400	112	20	92	4	43	0.0476191	0.215054	0.4	0.0454546	4.51613	0.113636	0	9	42	55	T	TGME49_316400	112	61	27	276	118	0.016129	0.357143	0.155235	0.470588	22.1429	3.03146
TGME49_316400:1927	0	12	2	14	T	TGME49_316400	1927	41	82	29	113	0.0238095	0.156627	0.1	0.131579	6.57831	1.31579	0	5	0	0	T	TGME49_316400	1927	76	46	18	6	0.012987	0.12766	0.0526316	0.142857	9.82979	2.71429
TGME49_316400:485	0	14	2	20	T	TGME49_316400	485	38	56	42	148	0.025641	0.263158	0.0697674	0.14094	10.2632	2.02013	12	50	38	83	T	TGME49_316400	485	415	380	336	469	0.03125	0.133858	0.115727	0.178723	4.28346	1.54435
TGME49_316400:494	0	11	9	22	T	TGME49_316400	494	32	62	47	142	0.030303	0.190476	0.208333	0.160839	6.28571	0.772028	19	77	17	145	T	TGME49_316400	494	445	436	400	526	0.044843	0.17849	0.0448878	0.27704	3.98032	6.17183
TGME49_316400:573	0	12	0	12	T	TGME49_316400	573	18	55	39	102	0.0526316	0.232143	0.025	0.126214	4.41071	5.04854	1	49	12	44	T	TGME49_316400	573	248	300	231	355	0.00803213	0.166113	0.0560345	0.126404	20.6811	2.25583
TGME49_316400:742	0	18	1	30	T	TGME49_316400	742	69	63	44	75	0.0142857	0.296875	0.0444444	0.407895	20.7812	9.17763	10	90	27	167	T	TGME49_316400	742	564	526	610	445	0.019469	0.172676	0.0458265	0.376682	8.86924	8.21973
TGME49_316600:1675	0	5	0	3	T	TGME49_316600	1675	57	17	8	11	0.0172414	0.333333	0.111111	0.333333	19.3333	3	0	6	0	0	T	TGME49_316600	1675	62	44	43	36	0.015873	0.155556	0.0227273	0.027027	9.8	1.18919
TGME49_316710:1059	0	10	0	0	T	TGME49_316710	1059	21	62	18	30	0.0454546	0.174603	0.0526316	0.0322581	3.84127	0.612903	0	11	0	13	T	TGME49_316710	1059	149	95	74	67	0.00666667	0.125	0.0133333	0.205882	18.75	15.4412
TGME49_318160:1889	0	5	0	0	T	TGME49_318160	1889	17	14	3	23	0.0555556	0.4	0.25	0.0416667	7.2	0.166667	0	6	0	18	T	TGME49_318160	1889	65	36	19	18	0.0151515	0.189189	0.05	1	12.4865	20
TGME49_318660:702	0	9	0	0	T	TGME49_318660	702	34	29	2	38	0.0285714	0.333333	0.333333	0.025641	11.6667	0.0769231	0	13	0	10	T	TGME49_318660	702	13	49	8	28	0.0714286	0.28	0.111111	0.37931	3.92	3.41379
TGME49_319340:1688	0	10	4	23	T	TGME49_319340	1688	36	39	7	45	0.027027	0.275	0.625	0.521739	10.175	0.834783	5	22	12	1	T	TGME49_319340	1688	71	35	12	32	0.0833333	0.638889	1	0.0606061	7.66667	0.0606061
TGME49_319340:1782	0	5	1	3	T	TGME49_319340	1782	44	22	15	51	0.0222222	0.26087	0.125	0.0769231	11.7391	0.615385	0	7	0	0	T	TGME49_319340	1782	88	49	16	45	0.011236	0.16	0.0588235	0.0217391	14.24	0.369565
TGME49_319340:2920	0	9	2	0	T	TGME49_319340	2920	29	29	14	3	0.0333333	0.333333	0.2	0.25	10	1.25	1	10	22	5	T	TGME49_319340	2920	41	50	22	6	0.047619	0.215686	1	0.857143	4.52941	0.857143
TGME49_319340:4337	0	10	0	1	T	TGME49_319340	4337	21	24	17	10	0.0454546	0.44	0.0555556	0.181818	9.68	3.27273	2	14	3	0	T	TGME49_319340	4337	77	47	24	5	0.0384615	0.3125	0.16	0.166667	8.125	1.04167
TGME49_319350:1276	0	6	0	12	T	TGME49_319350	1276	30	38	4	56	0.0322581	0.179487	0.2	0.22807	5.5641	1.14035	0	8	0	22	T	TGME49_319350	1276	44	55	4	60	0.0222222	0.160714	0.2	0.377049	7.23214	1.88525
TGME49_319350:677	0	11	0	18	T	TGME49_319350	677	28	52	6	60	0.0344828	0.226415	0.142857	0.311475	6.56604	2.18033	0	8	0	0	T	TGME49_319350	677	23	21	12	22	0.0416667	0.409091	0.0769231	0.0434783	9.81818	0.565217
TGME49_319350:853	0	5	0	0	T	TGME49_319350	853	84	39	15	45	0.0117647	0.15	0.0625	0.0217391	12.75	0.347826	0	7	6	7	T	TGME49_319350	853	34	35	29	100	0.0285714	0.222222	0.233333	0.0792079	7.77778	0.339463
TGME49_319530:1257	0	5	0	2	T	TGME49_319530	1257	23	10	4	9	0.0416667	0.545454	0.2	0.3	13.0909	1.5	0	9	0	0	T	TGME49_319530	1257	36	41	69	9	0.027027	0.238095	0.0142857	0.1	8.80952	7
TGME49_319560:1312	0	24	1	15	T	TGME49_319560	1312	12	29	24	49	0.0769231	0.833333	0.08	0.32	10.8333	4	4	23	15	69	T	TGME49_319560	1312	104	77	98	104	0.047619	0.307692	0.161616	0.666667	6.46154	4.125
TGME49_319640:4378	0	5	0	0	T	TGME49_319640	4378	54	37	24	30	0.0181818	0.157895	0.04	0.0322581	8.68421	0.806452	0	13	0	0	T	TGME49_319640	4378	67	65	86	3	0.0147059	0.212121	0.0114943	0.25	14.4242	21.75
TGME49_319850:495	1	13	5	0	T	TGME49_319850	495	20	21	8	6	0.0952381	0.636364	0.666667	0.142857	6.68182	0.214286	0	10	0	0	T	TGME49_319850	495	20	14	17	13	0.047619	0.733333	0.0555556	0.0714286	15.4	1.28571
TGME49_319850:566	0	5	0	1	T	TGME49_319850	566	45	22	18	18	0.0217391	0.26087	0.0526316	0.105263	12	2	0	11	0	12	T	TGME49_319850	566	49	44	7	28	0.02	0.266667	0.125	0.448276	13.3333	3.58621
TGME49_319870:1288	0	9	0	10	T	TGME49_319870	1288	21	30	3	39	0.0454546	0.322581	0.25	0.275	7.09677	1.1	0	9	0	33	T	TGME49_319870	1288	112	41	18	49	0.00884956	0.238095	0.0526316	0.68	26.9048	12.92
TGME49_319870:1623	0	5	1	7	T	TGME49_319870	1623	32	14	15	27	0.030303	0.4	0.125	0.285714	13.2	2.28571	0	23	0	24	T	TGME49_319870	1623	41	51	76	42	0.0238095	0.461538	0.012987	0.581395	19.3846	44.7674
TGME49_320050:113	0	13	0	3	T	TGME49_320050	113	146	109	41	94	0.00680272	0.127273	0.0238095	0.0421053	18.7091	1.76842	19	78	0	37	T	TGME49_320050	113	456	392	130	262	0.0437637	0.201018	0.00763359	0.144487	4.59326	18.9278
TGME49_320600:1031	0	9	0	17	T	TGME49_320600	1031	35	53	32	63	0.0277778	0.185185	0.030303	0.28125	6.66667	9.28125	0	8	0	0	T	TGME49_320600	1031	153	63	40	44	0.00649351	0.140625	0.0243902	0.0222222	21.6562	0.911111
TGME49_320600:307	0	9	0	12	T	TGME49_320600	307	33	66	14	34	0.0294118	0.149254	0.0666667	0.371429	5.07463	5.57143	8	27	45	56	T	TGME49_320600	307	189	125	85	137	0.0473684	0.222222	0.534884	0.413043	4.69136	0.772212
TGME49_321500:1174	0	5	3	2	T	TGME49_321500	1174	6	11	15	9	0.142857	0.5	0.25	0.3	3.5	1.2	2	8	23	13	T	TGME49_321500	1174	96	63	41	13	0.0309278	0.140625	0.571429	1	4.54688	1.75
TGME49_321500:1820	0	5	0	0	T	TGME49_321500	1820	42	39	9	20	0.0232558	0.15	0.1	0.0476191	6.45	0.476191	0	28	0	20	T	TGME49_321500	1820	96	80	16	48	0.0103093	0.358025	0.0588235	0.428571	34.7284	7.28571
TGME49_321500:2814	0	6	0	1	T	TGME49_321500	2814	18	22	9	55	0.0526316	0.304348	0.1	0.0357143	5.78261	0.357143	0	12	0	18	T	TGME49_321500	2814	109	55	31	40	0.00909091	0.232143	0.03125	0.463415	25.5357	14.8293
TGME49_321520:1371	0	6	0	2	T	TGME49_321520	1371	36	23	2	31	0.027027	0.291667	0.333333	0.09375	10.7917	0.28125	0	8	0	0	T	TGME49_321520	1371	35	47	133	4	0.0277778	0.1875	0.00746269	0.2	6.75	26.8
TGME49_321520:348	0	5	2	1	T	TGME49_321520	348	46	44	16	29	0.0212766	0.133333	0.176471	0.0666667	6.26667	0.377778	0	15	0	1	T	TGME49_321520	348	176	70	52	111	0.00564972	0.225352	0.0188679	0.0178571	39.8873	0.946429
TGME49_321520:579	0	6	1	4	T	TGME49_321520	579	50	37	29	55	0.0196078	0.18421	0.0666667	0.0892857	9.39474	1.33929	7	16	0	27	T	TGME49_321520	579	213	113	84	133	0.0373832	0.149123	0.0117647	0.208955	3.98904	17.7612
TGME49_321530:2231	0	5	0	1	T	TGME49_321530	2231	47	45	5	33	0.0208333	0.130435	0.166667	0.0588235	6.26087	0.352941	0	9	0	0	T	TGME49_321530	2231	43	66	27	32	0.0227273	0.149254	0.0357143	0.030303	6.56716	0.848485
TGME49_321530:2283	0	14	0	1	T	TGME49_321530	2283	15	39	9	37	0.0625	0.375	0.1	0.0526316	6	0.526316	2	38	18	0	T	TGME49_321530	2283	140	136	19	138	0.0212766	0.284672	0.95	0.00719425	13.3796	0.00757289
TGME49_321530:3144	0	8	0	6	T	TGME49_321530	3144	16	32	2	16	0.0588235	0.272727	0.333333	0.411765	4.63636	1.23529	0	7	0	18	T	TGME49_321530	3144	10	20	52	18	0.0909091	0.380952	0.0188679	1	4.19048	53
TGME49_321900:102	0	5	0	6	T	TGME49_321900	102	25	30	13	23	0.0384615	0.193548	0.0714286	0.291667	5.03226	4.08333	3	20	6	13	T	TGME49_321900	102	66	76	36	60	0.0597015	0.272727	0.189189	0.229508	4.56818	1.21311
TGME49_321900:367	0	7	0	14	T	TGME49_321900	367	32	12	2	21	0.030303	0.615385	0.333333	0.681818	20.3077	2.04546	0	11	2	1	T	TGME49_321900	367	92	94	50	111	0.0107527	0.126316	0.0588235	0.0178571	11.7474	0.303571
TGME49_321900:535	0	10	0	6	T	TGME49_321900	535	19	31	11	24	0.05	0.34375	0.0833333	0.28	6.875	3.36	0	43	7	26	T	TGME49_321900	535	201	246	269	288	0.0049505	0.178138	0.0296296	0.0934256	35.9838	3.15311
TGME49_323100:1038	0	5	0	1	T	TGME49_323100	1038	53	42	15	28	0.0185185	0.139535	0.0625	0.0689655	7.53488	1.10345	0	8	0	17	T	TGME49_323100	1038	46	51	20	47	0.0212766	0.173077	0.047619	0.375	8.13462	7.875
TGME49_323100:262	0	20	0	1	T	TGME49_323100	262	41	54	20	44	0.0238095	0.381818	0.0476191	0.0444444	16.0364	0.933333	7	19	0	32	T	TGME49_323100	262	187	116	64	130	0.0425532	0.17094	0.0153846	0.251908	4.01709	16.374
TGME49_323100:263	0	19	0	22	T	TGME49_323100	263	41	73	20	65	0.0238095	0.27027	0.0476191	0.348485	11.3514	7.31818	1	15	0	23	T	TGME49_323100	263	171	120	64	153	0.0116279	0.132231	0.0153846	0.155844	11.3719	10.1299
TGME49_323100:358	0	11	0	3	T	TGME49_323100	358	78	61	14	61	0.0126582	0.193548	0.0666667	0.0645161	15.2903	0.967742	0	20	0	3	T	TGME49_323100	358	35	69	2	35	0.0277778	0.3	0.333333	0.111111	10.8	0.333333
TGME49_323100:471	0	12	0	7	T	TGME49_323100	471	28	61	39	84	0.0344828	0.209677	0.025	0.0941176	6.08064	3.76471	1	18	0	16	T	TGME49_323100	471	103	82	27	88	0.0192308	0.228916	0.0357143	0.191011	11.9036	5.34831
TGME49_323100:871	0	8	0	6	T	TGME49_323100	871	36	41	26	47	0.027027	0.214286	0.037037	0.145833	7.92857	3.9375	0	5	0	10	T	TGME49_323100	871	44	29	6	26	0.0222222	0.2	0.142857	0.407407	9	2.85185
TGME49_323110:1243	1	10	1	3	T	TGME49_323110	1243	47	35	14	26	0.0416667	0.305556	0.133333	0.148148	7.33333	1.11111	11	46	55	60	T	TGME49_323110	1243	207	200	256	179	0.0576923	0.233831	0.217899	0.338889	4.05307	1.55526
TGME49_323400:162	0	6	0	7	T	TGME49_323400	162	40	49	9	30	0.0243902	0.14	0.1	0.258064	5.74	2.58065	0	7	6	0	T	TGME49_323400	162	29	37	15	4	0.0333333	0.210526	0.4375	0.2	6.31579	0.457143
TGME49_324600:119	0	9	1	24	T	TGME49_324600	119	41	50	18	85	0.0238095	0.196078	0.105263	0.290698	8.23529	2.76163	4	49	0	13	T	TGME49_324600	119	235	246	61	160	0.0211864	0.202429	0.016129	0.0869565	9.55466	5.3913
TGME49_324600:192	1	30	4	13	T	TGME49_324600	192	34	58	34	56	0.0571429	0.525424	0.142857	0.245614	9.19491	1.7193	3	22	2	8	T	TGME49_324600	192	75	54	14	56	0.0526316	0.418182	0.2	0.157895	7.94545	0.789474
TGME49_324600:274	0	11	0	4	T	TGME49_324600	274	38	49	9	28	0.025641	0.24	0.1	0.172414	9.36	1.72414	0	10	0	0	T	TGME49_324600	274	95	81	52	34	0.0104167	0.134146	0.0188679	0.0285714	12.878	1.51429
TGME49_324600:464	0	9	0	6	T	TGME49_324600	464	26	38	11	18	0.037037	0.25641	0.0833333	0.368421	6.92308	4.42105	0	9	0	0	T	TGME49_324600	464	68	64	11	23	0.0144928	0.153846	0.0833333	0.0416667	10.6154	0.5
TGME49_328700:58	0	5	0	0	T	TGME49_328700	58	20	21	5	20	0.0476191	0.272727	0.166667	0.0476191	5.72727	0.285714	1	11	0	0	T	TGME49_328700	58	46	47	44	25	0.0425532	0.25	0.0222222	0.0384615	5.875	1.73077
TGME49_462910:347	0	8	5	1	T	TGME49_462910	347	33	53	31	35	0.0294118	0.166667	0.1875	0.0555556	5.66667	0.296296	3	16	0	0	T	TGME49_462910	347	135	108	2	42	0.0294118	0.155963	0.333333	0.0232558	5.30275	0.0697674

## Sheet: brady_mrna_psis
full	wt_noCMC.x_signal	wt_CMC.x_signal	mut_noCMC.x_signal	mut_CMC.x_signal	nt.x	transcript.x	pos.x	wt_noCMC_depth.x	wt_CMC_depth.x	mut_noCMC_depth.x	mut_CMC_depth.x	wt_noCMC_pen.x	wt_CMC_pen.x	mut_noCMC_pen.x	mut_CMC_pen.x	wt_pen_ratio.x	mut_pen_ratio.x	wt_noCMC.y_signal	wt_CMC.y_signal	mut_noCMC.y_signal	mut_CMC.y_signal	nt.y	transcript	pos.y	wt_noCMC_depth.y	wt_CMC_depth.y	mut_noCMC_depth.y	mut_CMC_depth.y	wt_noCMC_pen.y	wt_CMC_pen.y	mut_noCMC_pen.y	mut_CMC_pen.y	wt_pen_ratio.y	mut_pen_ratio.y
ENST00000052754:507	0	7	4	0	T	ENST00000052754	507	75	36	23	405	0.0131579	0.216216	0.208333	0.00246305	16.4324	0.0118227	3	24	2	27	T	ENST00000052754	507	140	147	165	218	0.0283688	0.168919	0.0180723	0.127854	5.95439	7.07458
ENST00000196551:506	0	5	1	0	T	ENST00000196551	506	130	49	47	420	0.00763359	0.12	0.0416667	0.0023753	15.72	0.0570071	1	18	1	18	T	ENST00000196551	506	205	124	114	157	0.00970874	0.152	0.0173913	0.120253	15.656	6.91456
ENST00000202773:551	0	15	8	0	T	ENST00000202773	551	55	23	53	150	0.0178571	0.666667	0.166667	0.00662252	37.3333	0.0397351	7	59	17	105	T	ENST00000202773	551	235	278	237	368	0.0338983	0.215054	0.0756303	0.287263	6.34409	3.79825
ENST00000203407:924	0	24	0	0	T	ENST00000203407	924	9	41	23	412	0.1	0.595238	0.0416667	0.00242131	5.95238	0.0581114	0	7	0	4	T	ENST00000203407	924	23	37	12	34	0.0416667	0.210526	0.0769231	0.142857	5.05263	1.85714
ENST00000211998:734	0	8	0	125	T	ENST00000211998	734	12	8	4	125	0.0769231	1	0.2	1	13	5	0	7	6	8	T	ENST00000211998	734	29	22	15	43	0.0333333	0.347826	0.4375	0.204545	10.4348	0.467532
ENST00000216281:320	0	7	3	216	T	ENST00000216281	320	61	7	19	361	0.016129	1	0.2	0.599448	62	2.99724	1	13	4	7	T	ENST00000216281	320	94	99	82	110	0.0210526	0.14	0.060241	0.0720721	6.65	1.1964
ENST00000217652:138	0	5	0	0	T	ENST00000217652	138	8	8	3	95	0.111111	0.666667	0.25	0.0104167	6	0.0416667	0	5	4	4	T	ENST00000217652	138	55	26	33	37	0.0178571	0.222222	0.147059	0.131579	12.4444	0.894737
ENST00000219070:1478	0	10	1	0	T	ENST00000219070	1478	89	20	31	96	0.0111111	0.52381	0.0625	0.0103093	47.1429	0.164948	0	16	4	31	T	ENST00000219070	1478	61	113	96	187	0.016129	0.149123	0.0515464	0.170213	9.24561	3.30213
ENST00000219070:431	0	5	0	27	T	ENST00000219070	431	152	27	37	81	0.00653595	0.214286	0.0263158	0.341463	32.7857	12.9756	1	11	6	22	T	ENST00000219070	431	53	61	70	147	0.037037	0.193548	0.0985915	0.155405	5.22581	1.57625
ENST00000223357:3003	0	10	1	0	T	ENST00000223357	3003	23	19	20	56	0.0416667	0.55	0.0952381	0.0175439	13.2	0.184211	1	5	3	3	T	ENST00000223357	3003	31	23	40	36	0.0625	0.25	0.097561	0.108108	4	1.10811
ENST00000224237:1374	0	14	5	671	T	ENST00000224237	1374	255	114	184	1771	0.00390625	0.130435	0.0324324	0.379233	33.3913	11.693	17	188	52	204	T	ENST00000224237	1374	826	1261	904	1646	0.0217654	0.149762	0.0585635	0.124469	6.88074	2.12536
ENST00000225964:2438	0	14	6	0	T	ENST00000225964	2438	357	105	95	523	0.0027933	0.141509	0.0729167	0.0019084	50.6604	0.0261723	0	9	7	29	T	ENST00000225964	2438	25	51	58	183	0.0384615	0.192308	0.135593	0.163043	5	1.20245
ENST00000227507:322	0	23	1	0	T	ENST00000227507	322	45	34	36	445	0.0217391	0.685714	0.0540541	0.00224215	31.5429	0.0414798	5	61	5	76	T	ENST00000227507	322	125	160	66	183	0.047619	0.385093	0.0895522	0.418478	8.08696	4.67301
ENST00000227507:588	0	10	0	0	T	ENST00000227507	588	91	79	39	236	0.0108696	0.1375	0.025	0.00421941	12.65	0.168776	3	41	14	66	T	ENST00000227507	588	139	242	182	325	0.0285714	0.17284	0.0819672	0.205521	6.04938	2.50736
ENST00000229379:130	1	7	2	69	T	ENST00000229379	130	40	14	18	69	0.0487805	0.533333	0.157895	1	10.9333	6.33333	0	11	2	20	T	ENST00000229379	130	46	59	31	92	0.0212766	0.2	0.09375	0.225806	9.4	2.4086
ENST00000230050:104	3	46	18	984	T	ENST00000230050	104	560	173	237	1704	0.00713013	0.270115	0.0798319	0.577713	37.8836	7.23661	75	434	141	772	T	ENST00000230050	104	1076	1664	1357	2464	0.0705664	0.261261	0.104566	0.31359	3.70235	2.99898
ENST00000231004:373	0	24	1	0	T	ENST00000231004	373	21	42	31	415	0.0454545	0.581395	0.0625	0.00240385	12.7907	0.0384615	1	8	1	41	T	ENST00000231004	373	65	49	35	96	0.030303	0.18	0.0555556	0.43299	5.94	7.79381
ENST00000251453:379	0	9	3	0	T	ENST00000251453	379	115	46	109	572	0.00862069	0.212766	0.0363636	0.0017452	24.6809	0.047993	6	62	15	74	T	ENST00000251453	379	145	359	243	589	0.0479452	0.175	0.0655738	0.127119	3.65	1.93856
ENST00000253003:1006	0	19	0	0	T	ENST00000253003	1006	12	44	20	795	0.0769231	0.444444	0.047619	0.00125628	5.77778	0.0263819	0	6	1	13	T	ENST00000253003	1006	45	52	42	67	0.0217391	0.132075	0.0465116	0.205882	6.07547	4.42647
ENST00000258405:721	0	5	0	95	T	ENST00000258405	721	123	37	46	130	0.00806452	0.157895	0.0212766	0.732824	19.5789	34.4427	8	57	15	63	T	ENST00000258405	721	302	297	207	370	0.029703	0.194631	0.0769231	0.172507	6.55257	2.24259
ENST00000258405:909	0	12	3	21	T	ENST00000258405	909	230	52	60	228	0.004329	0.245283	0.0655738	0.0960699	56.6604	1.46507	16	44	20	41	T	ENST00000258405	909	299	217	216	236	0.0566667	0.206422	0.0967742	0.177215	3.64274	1.83122
ENST00000258733:747	0	5	0	0	T	ENST00000258733	747	11	8	7	133	0.0833333	0.666667	0.125	0.00746269	8	0.0597015	3	35	13	26	T	ENST00000258733	747	76	130	101	132	0.0519481	0.274809	0.137255	0.203008	5.29008	1.47905
ENST00000260356:1888	26	24	6	0	T	ENST00000260356	1888	513	54	144	867	0.0525292	0.454545	0.0482759	0.00115207	8.6532	0.0238644	11	46	10	97	T	ENST00000260356	1888	349	283	329	545	0.0342857	0.165493	0.0333333	0.179487	4.82688	5.38462
ENST00000260356:996	0	7	3	0	T	ENST00000260356	996	105	7	16	1	0.00943396	1	0.235294	0.5	106	2.125	3	13	15	22	T	ENST00000260356	996	79	75	229	188	0.05	0.184211	0.0695652	0.121693	3.68421	1.74934
ENST00000262213:749	0	6	1	0	T	ENST00000262213	749	35	6	6	24	0.0277778	1	0.285714	0.04	36	0.14	1	8	3	3	T	ENST00000262213	749	24	29	37	25	0.08	0.3	0.105263	0.153846	3.75	1.46154
ENST00000269593:382	7	10	2	0	T	ENST00000269593	382	141	25	63	189	0.056338	0.423077	0.046875	0.00526316	7.50962	0.112281	3	25	10	53	T	ENST00000269593	382	115	88	94	159	0.0344828	0.292135	0.115789	0.3375	8.47191	2.91477
ENST00000295550:7624	0	8	0	0	T	ENST00000295550	7624	25	11	16	150	0.0384615	0.75	0.0588235	0.00662252	19.5	0.112583	0	8	2	11	T	ENST00000295550	7624	20	41	29	54	0.047619	0.214286	0.1	0.218182	4.5	2.18182
ENST00000295927:178	0	19	1	0	T	ENST00000295927	178	182	30	23	320	0.00546448	0.645161	0.0833333	0.00311526	118.065	0.0373832	6	34	7	31	T	ENST00000295927	178	98	114	89	102	0.0707071	0.304348	0.0888889	0.31068	4.30435	3.49515
ENST00000296417:332	0	9	0	0	T	ENST00000296417	332	76	9	68	284	0.012987	1	0.0144928	0.00350877	77	0.242105	10	56	15	57	T	ENST00000296417	332	282	334	169	391	0.0388693	0.170149	0.0941176	0.147959	4.37748	1.57207
ENST00000297268:2094	9	17	9	14	T	ENST00000297268	2094	409	66	164	505	0.0243902	0.268657	0.0606061	0.0296443	11.0149	0.48913	0	11	1	39	T	ENST00000297268	2094	85	85	150	243	0.0116279	0.139535	0.013245	0.163934	12	12.377
ENST00000297268:2510	23	18	7	0	T	ENST00000297268	2510	564	91	149	918	0.0424779	0.206522	0.0533333	0.00108814	4.86187	0.0204026	6	28	11	40	T	ENST00000297268	2510	164	170	230	310	0.0424242	0.169591	0.0519481	0.131833	3.99749	2.53778
ENST00000297268:4021	3	14	11	226	T	ENST00000297268	4021	741	90	230	226	0.00539084	0.164835	0.0519481	1	30.5769	19.25	24	114	39	160	T	ENST00000297268	4021	589	410	644	740	0.0423729	0.279805	0.0620155	0.217274	6.60341	3.50354
ENST00000300527:2242	8	5	0	33	T	ENST00000300527	2242	121	19	33	380	0.0737705	0.3	0.0294118	0.0892388	4.06667	3.03412	0	20	4	15	T	ENST00000300527	2242	58	120	60	192	0.0169492	0.173554	0.0819672	0.0829016	10.2397	1.0114
ENST00000301072:1254	4	5	2	0	T	ENST00000301072	1254	63	9	19	52	0.078125	0.6	0.15	0.0188679	7.68	0.125786	1	17	3	8	T	ENST00000301072	1254	29	56	49	53	0.0666667	0.315789	0.08	0.166667	4.73684	2.08333
ENST00000301821:516	3	6	0	0	T	ENST00000301821	516	106	20	18	228	0.0373832	0.333333	0.0526316	0.00436681	8.91667	0.0829694	2	9	9	12	T	ENST00000301821	516	78	63	87	83	0.0379747	0.15625	0.113636	0.154762	4.11458	1.3619
ENST00000304863:426	0	5	0	0	T	ENST00000304863	426	38	5	15	555	0.025641	1	0.0625	0.00179856	39	0.028777	1	13	6	10	T	ENST00000304863	426	40	72	46	75	0.0487805	0.191781	0.148936	0.144737	3.93151	0.971805
ENST00000306434:1109	0	17	0	0	T	ENST00000306434	1109	56	17	5	23	0.0175439	1	0.166667	0.0416667	57	0.25	1	13	7	27	T	ENST00000306434	1109	65	98	130	127	0.030303	0.141414	0.0610687	0.21875	4.66667	3.58203
ENST00000307940:291	0	9	0	99	T	ENST00000307940	291	38	9	18	126	0.025641	1	0.0526316	0.787402	39	14.9606	1	23	5	27	T	ENST00000307940	291	34	66	39	96	0.0571429	0.358209	0.15	0.28866	6.26866	1.9244
ENST00000309311:1004	0	7	4	0	T	ENST00000309311	1004	108	8	134	98	0.00917431	0.888889	0.037037	0.010101	96.8889	0.272727	10	36	10	63	T	ENST00000309311	1004	323	265	428	370	0.0339506	0.139098	0.025641	0.172507	4.09706	6.72776
ENST00000309311:1951	23	18	5	0	T	ENST00000309311	1951	278	58	106	19	0.0860215	0.322034	0.0560748	0.05	3.74364	0.891667	1	51	14	39	T	ENST00000309311	1951	203	317	282	575	0.00980392	0.163522	0.0530035	0.0694444	16.6792	1.31019
ENST00000309311:198	0	17	3	0	T	ENST00000309311	198	196	40	98	95	0.00507614	0.439024	0.040404	0.0104167	86.4878	0.257812	1	18	4	65	T	ENST00000309311	198	132	155	253	371	0.0150376	0.121795	0.019685	0.177419	8.09936	9.0129
ENST00000311111:107	0	6	1	100	T	ENST00000311111	107	45	19	20	214	0.0217391	0.35	0.0952381	0.469767	16.1	4.93256	5	39	13	43	T	ENST00000311111	107	101	125	129	118	0.0588235	0.31746	0.107692	0.369748	5.39683	3.43337
ENST00000311528:191	3	11	6	36	T	ENST00000311528	191	186	84	112	371	0.0213904	0.141176	0.0619469	0.0994624	6.6	1.60561	3	39	16	82	T	ENST00000311528	191	182	230	136	332	0.0218579	0.17316	0.124088	0.249249	7.92208	2.00866
ENST00000315274:1171	38	20	5	584	T	ENST00000315274	1171	898	66	229	1397	0.0433815	0.313433	0.026087	0.418455	7.22503	16.0408	189	754	84	291	T	ENST00000315274	1171	3785	3145	1105	1277	0.0501849	0.239987	0.0768535	0.228482	4.78206	2.97295
ENST00000315274:850	50	23	7	0	T	ENST00000315274	850	498	55	129	668	0.102204	0.428571	0.0615385	0.00149477	4.19328	0.02429	113	390	62	145	T	ENST00000315274	850	3002	2287	847	896	0.037962	0.170892	0.0742925	0.162765	4.50164	2.19087
ENST00000315274:886	6	28	7	224	T	ENST00000315274	886	253	112	79	527	0.0275591	0.256637	0.1	0.426136	9.31226	4.26136	84	498	59	144	T	ENST00000315274	886	1846	2592	774	867	0.0460206	0.192441	0.0774194	0.167051	4.18163	2.15774
ENST00000315377:609	0	9	2	3	T	ENST00000315377	609	103	56	85	405	0.00961539	0.175439	0.0348837	0.00985222	18.2456	0.28243	14	112	35	177	T	ENST00000315377	609	275	437	399	733	0.0543478	0.257991	0.09	0.242507	4.74703	2.69452
ENST00000316084:708	0	12	2	0	T	ENST00000316084	708	396	103	188	990	0.00251889	0.125	0.015873	0.00100908	49.625	0.0635721	14	91	25	106	T	ENST00000316084	708	822	696	631	957	0.018226	0.131994	0.0411392	0.111691	7.24209	2.71495
ENST00000316448:988	0	7	0	0	T	ENST00000316448	988	39	32	29	194	0.025	0.242424	0.0333333	0.00512821	9.69697	0.153846	3	25	5	40	T	ENST00000316448	988	123	176	122	221	0.0322581	0.146893	0.0487805	0.184685	4.55367	3.78604
ENST00000319622:1072	0	5	1	0	T	ENST00000319622	1072	21	10	8	73	0.0454545	0.545455	0.222222	0.0135135	12	0.0608108	0	7	3	4	T	ENST00000319622	1072	28	44	40	40	0.0344828	0.177778	0.097561	0.121951	5.15556	1.25
ENST00000325110:479	0	10	0	0	T	ENST00000325110	479	72	10	10	248	0.0136986	1	0.0909091	0.00401606	73	0.0441767	1	5	0	2	T	ENST00000325110	479	51	36	54	50	0.0384615	0.162162	0.0181818	0.0588235	4.21622	3.23529
ENST00000329251:1267	0	14	2	0	T	ENST00000329251	1267	81	80	80	351	0.0121951	0.185185	0.037037	0.00284091	15.1852	0.0767045	4	49	22	53	T	ENST00000329251	1267	280	399	231	613	0.0177936	0.125	0.0991379	0.0879479	7.025	0.887126
ENST00000329251:145	0	9	7	0	T	ENST00000329251	145	118	58	112	669	0.00840336	0.169492	0.0707965	0.00149254	20.1695	0.0210821	8	51	25	86	T	ENST00000329251	145	380	329	339	442	0.023622	0.157576	0.0764706	0.196388	6.67071	2.56815
ENST00000329251:450	1	5	10	268	T	ENST00000329251	450	83	47	38	510	0.0238095	0.125	0.282051	0.526419	5.25	1.86639	2	21	13	65	T	ENST00000329251	450	167	178	220	250	0.0178571	0.122905	0.0633484	0.262948	6.88268	4.15083
ENST00000329251:451	0	13	0	0	T	ENST00000329251	451	83	60	38	510	0.0119048	0.229508	0.025641	0.00195695	19.2787	0.0763209	6	38	20	69	T	ENST00000329251	451	172	214	237	312	0.0404624	0.181395	0.0882353	0.223642	4.48306	2.53461
ENST00000329251:538	8	5	1	0	T	ENST00000329251	538	227	24	202	532	0.0394737	0.24	0.00985222	0.00187617	6.08	0.190432	4	92	18	132	T	ENST00000329251	538	232	604	319	1017	0.0214592	0.153719	0.059375	0.130648	7.16331	2.20039
ENST00000330339:381	0	11	3	0	T	ENST00000330339	381	114	35	53	442	0.00869565	0.333333	0.0740741	0.00225734	38.3333	0.030474	7	28	18	55	T	ENST00000330339	381	229	196	208	275	0.0347826	0.147208	0.0909091	0.202899	4.23223	2.23188
ENST00000331523:785	24	34	20	529	T	ENST00000331523	785	836	248	512	1922	0.0298686	0.140562	0.0409357	0.275611	4.70602	6.73278	39	275	114	416	T	ENST00000331523	785	1345	1563	1404	2340	0.0297177	0.176471	0.0818505	0.178129	5.93824	2.17627
ENST00000331789:1093	0	17	10	0	T	ENST00000331789	1093	175	87	102	547	0.00568182	0.204545	0.106796	0.00182482	36	0.0170869	10	63	10	55	T	ENST00000331789	1093	282	398	294	587	0.0388693	0.160401	0.0372881	0.0952381	4.12668	2.55411
ENST00000334478:304	0	9	0	0	T	ENST00000334478	304	6	9	5	17	0.142857	1	0.166667	0.0555556	7	0.333333	1	10	1	14	T	ENST00000334478	304	33	33	22	25	0.0588235	0.323529	0.0869565	0.576923	5.5	6.63462
ENST00000334701:2513	0	11	1	0	T	ENST00000334701	2513	61	12	19	3	0.016129	0.923077	0.1	0.25	57.2308	2.5	3	17	7	7	T	ENST00000334701	2513	97	93	77	89	0.0408163	0.191489	0.102564	0.0888889	4.69149	0.866667
ENST00000335181:1072	0	6	1	0	T	ENST00000335181	1072	29	14	11	77	0.0333333	0.466667	0.166667	0.0128205	14	0.0769231	0	7	2	3	T	ENST00000335181	1072	31	57	23	43	0.03125	0.137931	0.125	0.0909091	4.41379	0.727273
ENST00000335181:1183	0	13	3	0	T	ENST00000335181	1183	138	49	47	28	0.00719425	0.28	0.0833333	0.0344828	38.92	0.413793	12	55	11	58	T	ENST00000335181	1183	397	333	146	294	0.0326633	0.167665	0.0816327	0.2	5.13312	2.45
ENST00000336812:1573	0	8	0	0	T	ENST00000336812	1573	87	23	6	8	0.0113636	0.375	0.142857	0.111111	33	0.777778	1	11	1	14	T	ENST00000336812	1573	65	66	47	79	0.030303	0.179104	0.0416667	0.1875	5.91045	4.5
ENST00000338970:533	0	7	0	0	T	ENST00000338970	533	170	38	70	207	0.00584795	0.205128	0.0140845	0.00480769	35.0769	0.341346	8	32	15	34	T	ENST00000338970	533	223	174	248	186	0.0401786	0.188571	0.064257	0.187166	4.69333	2.91277
ENST00000339647:773	0	6	0	0	T	ENST00000339647	773	31	31	18	41	0.03125	0.21875	0.0526316	0.0238095	7	0.452381	2	8	4	9	T	ENST00000339647	773	63	51	67	59	0.046875	0.173077	0.0735294	0.166667	3.69231	2.26667
ENST00000340923:778	0	5	1	0	T	ENST00000340923	778	13	9	4	111	0.0714286	0.6	0.4	0.00892857	8.4	0.0223214	0	5	3	3	T	ENST00000340923	778	25	24	25	36	0.0384615	0.24	0.153846	0.108108	6.24	0.702703
ENST00000346358:4789	0	9	1	0	T	ENST00000346358	4789	27	12	16	228	0.0357143	0.769231	0.117647	0.00436681	21.5385	0.0371179	0	8	1	11	T	ENST00000346358	4789	20	34	25	53	0.047619	0.257143	0.0769231	0.222222	5.4	2.88889
ENST00000346798:1919	0	6	0	0	T	ENST00000346798	1919	13	21	8	86	0.0714286	0.318182	0.111111	0.0114943	4.45455	0.103448	0	6	1	8	T	ENST00000346798	1919	36	34	29	44	0.027027	0.2	0.0666667	0.2	7.4	3
ENST00000346798:959	1	12	0	96	T	ENST00000346798	959	18	22	11	96	0.105263	0.565217	0.0833333	1	5.36957	12	2	62	5	86	T	ENST00000346798	959	22	99	28	141	0.130435	0.63	0.206897	0.612676	4.83	2.96127
ENST00000347401:4951	8	8	0	0	T	ENST00000347401	4951	45	10	9	100	0.195652	0.818182	0.1	0.00990099	4.18182	0.0990099	2	20	6	30	T	ENST00000347401	4951	25	48	51	108	0.115385	0.428571	0.134615	0.284404	3.71429	2.11271
ENST00000354332:46	0	8	0	0	T	ENST00000354332	46	81	21	17	120	0.0121951	0.409091	0.0555556	0.00826446	33.5455	0.14876	1	20	3	15	T	ENST00000354332	46	52	125	73	119	0.0377358	0.166667	0.0540541	0.133333	4.41667	2.46667
ENST00000356657:224	0	7	0	0	T	ENST00000356657	224	57	12	14	200	0.0172414	0.615385	0.0666667	0.00497512	35.6923	0.0746269	3	11	8	14	T	ENST00000356657	224	61	52	54	52	0.0645161	0.226415	0.163636	0.283019	3.50943	1.72956
ENST00000356657:805	0	6	2	0	T	ENST00000356657	805	68	7	28	441	0.0144928	0.875	0.103448	0.00226244	60.375	0.0218703	8	51	5	40	T	ENST00000356657	805	196	251	123	238	0.0456853	0.206349	0.0483871	0.171548	4.51675	3.54533
ENST00000358435:68	0	5	3	0	T	ENST00000358435	68	59	14	24	306	0.0166667	0.4	0.16	0.00325733	24	0.0203583	1	11	6	13	T	ENST00000358435	68	50	82	57	107	0.0392157	0.144578	0.12069	0.12963	3.68675	1.07407
ENST00000358971:166	0	11	0	0	T	ENST00000358971	166	49	20	17	90	0.02	0.571429	0.0555556	0.010989	28.5714	0.197802	0	16	7	23	T	ENST00000358971	166	44	92	74	138	0.0222222	0.182796	0.106667	0.172662	8.22581	1.61871
ENST00000361157:112	7	7	1	0	T	ENST00000361157	112	120	13	46	290	0.0661157	0.571429	0.0425532	0.00343643	8.64286	0.080756	1	31	7	24	T	ENST00000361157	112	66	126	36	87	0.0298507	0.251969	0.216216	0.284091	8.44094	1.31392
ENST00000361789:658	0	24	14	0	T	ENST00000361789	658	774	178	384	4497	0.00129032	0.139665	0.038961	0.000222321	108.24	0.00570624	41	183	38	170	T	ENST00000361789	658	893	856	800	915	0.0469799	0.214702	0.0486891	0.186681	4.5701	3.83415
ENST00000361866:2776	1	10	6	75	T	ENST00000361866	2776	234	47	123	494	0.00851064	0.229167	0.0564516	0.153535	26.9271	2.71977	12	108	33	159	T	ENST00000361866	2776	168	362	211	565	0.0769231	0.300275	0.160377	0.282686	3.90358	1.76263
ENST00000361866:637	0	11	15	0	T	ENST00000361866	637	164	62	117	589	0.00606061	0.190476	0.135593	0.00169491	31.4286	0.0125	8	46	11	68	T	ENST00000361866	637	315	366	205	417	0.028481	0.128065	0.0582524	0.165072	4.49652	2.83373
ENST00000362079:479	0	20	28	11	T	ENST00000362079	479	279	117	475	1458	0.00357143	0.177966	0.0609244	0.00822481	49.8305	0.135	53	172	88	304	T	ENST00000362079	479	1678	1426	1765	1653	0.032162	0.121233	0.0503964	0.184401	3.76946	3.65902
ENST00000367048:843	1	8	0	0	T	ENST00000367048	843	35	28	14	70	0.0555556	0.310345	0.0666667	0.0140845	5.58621	0.211268	2	8	2	14	T	ENST00000367048	843	78	59	42	84	0.0379747	0.15	0.0697674	0.176471	3.95	2.52941
ENST00000368714:159	0	5	1	0	T	ENST00000368714	159	55	7	20	24	0.0178571	0.75	0.0952381	0.04	42	0.42	1	10	3	8	T	ENST00000368714	159	82	87	119	99	0.0240964	0.125	0.0333333	0.09	5.1875	2.7
ENST00000368720:208	6	6	2	0	T	ENST00000368720	208	195	54	88	138	0.0357143	0.127273	0.0337079	0.00719425	3.56364	0.213429	21	145	36	193	T	ENST00000368720	208	335	456	295	576	0.0654762	0.319475	0.125	0.336222	4.87925	2.68977
ENST00000369026:803	0	5	2	0	T	ENST00000369026	803	165	18	49	412	0.0060241	0.315789	0.06	0.00242131	52.4211	0.0403551	8	29	14	14	T	ENST00000369026	803	252	146	174	104	0.0355731	0.204082	0.0857143	0.142857	5.73696	1.66667
ENST00000369817:21	4	7	4	0	T	ENST00000369817	21	65	17	37	129	0.0757576	0.444444	0.131579	0.00769231	5.86667	0.0584615	1	8	0	14	T	ENST00000369817	21	31	34	26	57	0.0625	0.257143	0.037037	0.258621	4.11429	6.98276
ENST00000371554:1758	0	7	2	0	T	ENST00000371554	1758	45	25	21	22	0.0217391	0.307692	0.136364	0.0434783	14.1538	0.318841	1	18	3	14	T	ENST00000371554	1758	113	139	93	187	0.0175439	0.135714	0.0425532	0.0797872	7.73571	1.875
ENST00000373626:296	0	7	0	0	T	ENST00000373626	296	35	7	34	198	0.0277778	1	0.0285714	0.00502513	36	0.175879	5	32	4	38	T	ENST00000373626	296	129	194	205	291	0.0461538	0.169231	0.0242718	0.133562	3.66667	5.50274
ENST00000378019:1417	0	20	7	0	T	ENST00000378019	1417	73	76	87	421	0.0135135	0.272727	0.0909091	0.00236967	20.1818	0.0260664	7	49	17	80	T	ENST00000378019	1417	265	390	235	606	0.0300752	0.127877	0.0762712	0.133443	4.25192	1.74959
ENST00000378019:295	0	9	6	0	T	ENST00000378019	295	119	59	113	606	0.00833333	0.166667	0.0614035	0.00164745	20	0.0268298	11	55	15	80	T	ENST00000378019	295	402	310	340	418	0.0297767	0.180064	0.0469208	0.193317	6.04716	4.12008
ENST00000378019:721	0	12	2	0	T	ENST00000378019	721	129	62	79	386	0.00769231	0.206349	0.0375	0.00258398	26.8254	0.0689061	22	89	22	118	T	ENST00000378019	721	480	524	306	659	0.047817	0.171429	0.0749186	0.180303	3.58509	2.40665
ENST00000379055:282	0	5	0	56	T	ENST00000379055	282	74	20	47	366	0.0133333	0.285714	0.0208333	0.155313	21.4286	7.45504	13	61	23	55	T	ENST00000379055	282	334	411	369	409	0.041791	0.150485	0.0648649	0.136585	3.6009	2.10569
ENST00000379060:303	0	6	0	91	T	ENST00000379060	303	72	13	29	287	0.0136986	0.5	0.0333333	0.319444	36.5	9.58333	10	65	16	81	T	ENST00000379060	303	235	234	258	255	0.0466102	0.280851	0.0656371	0.320312	6.02553	4.88006
ENST00000379341:607	0	5	0	183	T	ENST00000379341	607	21	12	4	405	0.0454545	0.461538	0.2	0.453202	10.1538	2.26601	1	11	7	7	T	ENST00000379341	607	38	49	32	57	0.0512821	0.24	0.242424	0.137931	4.68	0.568966
ENST00000380384:609	0	6	2	1	T	ENST00000380384	609	124	47	58	368	0.008	0.145833	0.0508475	0.00542005	18.2292	0.106594	14	123	45	184	T	ENST00000380384	609	294	436	430	689	0.0508475	0.283753	0.106729	0.268116	5.58047	2.51213
ENST00000381401:265	0	43	0	0	T	ENST00000381401	265	179	84	144	1	0.00555556	0.517647	0.00689655	0.5	93.1765	72.5	10	35	20	39	T	ENST00000381401	265	404	299	246	418	0.0271605	0.12	0.0850202	0.0954654	4.41818	1.12285
ENST00000382361:433	0	9	4	0	T	ENST00000382361	433	16	12	17	34	0.0588235	0.769231	0.277778	0.0285714	13.0769	0.102857	0	6	4	18	T	ENST00000382361	433	30	29	30	36	0.0322581	0.233333	0.16129	0.513514	7.23333	3.18378
ENST00000389805:73	0	5	0	0	T	ENST00000389805	73	43	13	32	129	0.0227273	0.428571	0.030303	0.00769231	18.8571	0.253846	0	15	2	20	T	ENST00000389805	73	25	71	27	136	0.0384615	0.222222	0.107143	0.153285	5.77778	1.43066
ENST00000393099:191	8	20	7	32	T	ENST00000393099	191	184	87	143	398	0.0486486	0.238636	0.0555556	0.0827068	4.9053	1.48872	1	42	14	82	T	ENST00000393099	191	169	221	147	339	0.0117647	0.193694	0.101351	0.244118	16.464	2.40863
ENST00000393099:525	0	5	1	0	T	ENST00000393099	525	46	18	43	150	0.0212766	0.315789	0.0454545	0.00662252	14.8421	0.145695	8	56	23	87	T	ENST00000393099	525	123	191	177	240	0.0725806	0.296875	0.134831	0.365145	4.09028	2.70816
ENST00000394934:590	12	23	4	14	T	ENST00000394934	590	293	73	83	258	0.0442177	0.324324	0.0595238	0.0579151	7.33472	0.972973	3	16	3	24	T	ENST00000394934	590	116	129	154	195	0.034188	0.130769	0.0258065	0.127551	3.825	4.9426
ENST00000396076:542	0	8	0	0	T	ENST00000396076	542	30	12	24	164	0.0322581	0.692308	0.04	0.00606061	21.4615	0.151515	4	18	8	37	T	ENST00000396076	542	78	80	47	110	0.0632911	0.234568	0.1875	0.342342	3.70617	1.82583
ENST00000396680:280	10	8	1	0	T	ENST00000396680	280	49	8	6	199	0.22	1	0.285714	0.005	4.54545	0.0175	2	18	12	23	T	ENST00000396680	280	29	41	58	73	0.1	0.452381	0.220339	0.324324	4.52381	1.47193
ENST00000396821:1422	0	6	1	3	T	ENST00000396821	1422	9	7	5	4	0.1	0.875	0.333333	0.8	8.75	2.4	0	5	3	3	T	ENST00000396821	1422	14	23	11	22	0.0666667	0.25	0.333333	0.173913	3.75	0.521739
ENST00000396856:658	0	6	8	10	T	ENST00000396856	658	116	38	104	169	0.00854701	0.179487	0.0857143	0.0647059	21	0.754902	11	87	15	101	T	ENST00000396856	658	318	351	207	381	0.0376176	0.25	0.0769231	0.267016	6.64583	3.4712
ENST00000396859:883	0	8	3	19	T	ENST00000396859	883	126	45	82	195	0.00787402	0.195652	0.0481928	0.102041	24.8478	2.11735	12	101	26	99	T	ENST00000396859	883	309	326	216	390	0.0419355	0.311927	0.124424	0.255754	7.43825	2.05551
ENST00000396953:20	0	5	3	4	T	ENST00000396953	20	58	16	39	80	0.0169492	0.352941	0.1	0.0617284	20.8235	0.617284	1	9	1	8	T	ENST00000396953	20	58	57	47	90	0.0338983	0.172414	0.0416667	0.0989011	5.08621	2.37363
ENST00000398603:166	17	7	1	0	T	ENST00000398603	166	106	10	44	279	0.168224	0.727273	0.0444444	0.00357143	4.32323	0.0803571	0	35	10	32	T	ENST00000398603	166	89	142	81	193	0.0111111	0.251748	0.134146	0.170103	22.6573	1.26804
ENST00000402527:695	0	10	0	0	T	ENST00000402527	695	11	24	25	396	0.0833333	0.44	0.0384615	0.00251889	5.28	0.0654912	17	62	33	89	T	ENST00000402527	695	217	174	246	211	0.0825688	0.36	0.137652	0.424528	4.36	3.08407
ENST00000402874:423	7	5	2	1	T	ENST00000402874	423	59	9	25	73	0.133333	0.6	0.115385	0.027027	4.5	0.234234	1	5	7	10	T	ENST00000402874	423	58	48	41	50	0.0338983	0.122449	0.190476	0.215686	3.61224	1.13235
ENST00000409304:1004	0	7	4	33	T	ENST00000409304	1004	59	34	34	47	0.0166667	0.228571	0.142857	0.708333	13.7143	4.95833	6	40	8	27	T	ENST00000409304	1004	314	267	230	224	0.0222222	0.152985	0.038961	0.124444	6.88433	3.19407
ENST00000409304:721	1	8	4	83	T	ENST00000409304	721	126	45	50	112	0.015748	0.195652	0.0980392	0.743363	12.4239	7.5823	4	56	16	78	T	ENST00000409304	721	299	311	215	396	0.0166667	0.182692	0.0787037	0.198992	10.9615	2.52837
ENST00000409557:181	1	6	0	178	T	ENST00000409557	181	30	12	15	292	0.0645161	0.538462	0.0625	0.610922	8.34615	9.77474	1	13	6	13	T	ENST00000409557	181	101	90	96	101	0.0196078	0.153846	0.0721649	0.137255	7.84615	1.90196
ENST00000409809:6122	0	5	0	0	T	ENST00000409809	6122	24	8	11	111	0.04	0.666667	0.0833333	0.00892857	16.6667	0.107143	0	6	0	1	T	ENST00000409809	6122	41	19	17	16	0.0238095	0.35	0.0555556	0.117647	14.7	2.11765
ENST00000409809:8480	0	9	0	0	T	ENST00000409809	8480	19	11	19	272	0.05	0.833333	0.05	0.003663	16.6667	0.0732601	0	8	1	10	T	ENST00000409809	8480	42	49	40	48	0.0232558	0.18	0.0487805	0.22449	7.74	4.60204
ENST00000409840:1004	1	9	2	46	T	ENST00000409840	1004	76	27	45	71	0.025974	0.357143	0.0652174	0.652778	13.75	10.0093	7	39	22	23	T	ENST00000409840	1004	303	242	246	221	0.0263158	0.164609	0.0931174	0.108108	6.25514	1.16099
ENST00000409840:909	0	7	2	26	T	ENST00000409840	909	247	43	84	212	0.00403226	0.181818	0.0352941	0.126761	45.0909	3.59155	12	40	16	37	T	ENST00000409840	909	291	187	206	242	0.0445205	0.218085	0.0821256	0.156379	4.89853	1.90414
ENST00000413699:387	0	8	1	66	T	ENST00000413699	387	40	20	15	158	0.0243902	0.428571	0.125	0.421384	17.5714	3.37107	5	31	7	36	T	ENST00000413699	387	152	181	156	217	0.0392157	0.175824	0.0509554	0.169725	4.48352	3.33085
ENST00000415719:387	1	7	1	55	T	ENST00000415719	387	36	19	15	180	0.0540541	0.4	0.125	0.309392	7.4	2.47514	5	31	15	35	T	ENST00000415719	387	136	175	179	223	0.0437956	0.181818	0.0888889	0.160714	4.15152	1.80804
ENST00000416518:154	1	6	9	0	T	ENST00000416518	154	199	24	98	335	0.01	0.28	0.10101	0.00297619	28	0.0294643	11	109	21	134	T	ENST00000416518	154	173	299	184	430	0.0689655	0.366667	0.118919	0.313225	5.31667	2.63394
ENST00000433297:479	0	7	1	0	T	ENST00000433297	479	54	7	9	217	0.0181818	1	0.2	0.00458716	55	0.0229358	0	6	1	2	T	ENST00000433297	479	39	46	50	52	0.025	0.148936	0.0392157	0.0566038	5.95745	1.4434
ENST00000434122:376	2	6	2	46	T	ENST00000434122	376	53	19	42	311	0.0555556	0.35	0.0697674	0.150641	6.3	2.15919	5	38	14	63	T	ENST00000434122	376	107	177	161	239	0.0555556	0.219101	0.0925926	0.266667	3.94382	2.88
ENST00000436427:1086	16	8	6	0	T	ENST00000436427	1086	76	10	51	111	0.220779	0.818182	0.134615	0.00892857	3.70588	0.0663265	11	49	18	67	T	ENST00000436427	1086	130	148	143	213	0.0916031	0.33557	0.131944	0.317757	3.66331	2.40826
ENST00000437642:616	4	10	3	0	T	ENST00000437642	616	67	28	31	76	0.0735294	0.37931	0.125	0.012987	5.15862	0.103896	1	23	9	27	T	ENST00000437642	616	28	71	61	117	0.0689655	0.333333	0.16129	0.237288	4.83333	1.47119
ENST00000445463:32	0	8	0	0	T	ENST00000445463	32	103	13	20	250	0.00961539	0.642857	0.047619	0.00398406	66.8571	0.0836653	0	7	1	5	T	ENST00000445463	32	73	61	31	80	0.0135135	0.129032	0.0625	0.0740741	9.54839	1.18519
ENST00000445463:782	0	8	2	0	T	ENST00000445463	782	41	12	25	42	0.0238095	0.692308	0.115385	0.0232558	29.0769	0.20155	4	14	8	15	T	ENST00000445463	782	100	76	52	72	0.0495049	0.194805	0.169811	0.219178	3.93506	1.29072
ENST00000447280:945	0	10	3	21	T	ENST00000447280	945	227	44	60	215	0.00438597	0.244444	0.0655738	0.101852	55.7333	1.55324	11	36	16	35	T	ENST00000447280	945	272	195	223	210	0.043956	0.188776	0.0758929	0.170616	4.29464	2.24812
ENST00000447866:26	0	5	0	0	T	ENST00000447866	26	46	11	8	164	0.0212766	0.5	0.111111	0.00606061	23.5	0.0545455	1	16	5	8	T	ENST00000447866	26	44	67	47	45	0.0444444	0.25	0.125	0.195652	5.625	1.56522
ENST00000448388:1862	0	6	1	0	T	ENST00000448388	1862	52	12	17	1	0.0188679	0.538462	0.111111	0.5	28.5385	4.5	1	13	2	10	T	ENST00000448388	1862	43	50	38	69	0.0454545	0.27451	0.0769231	0.157143	6.03922	2.04286
ENST00000449901:1138	0	10	5	0	T	ENST00000449901	1138	149	40	41	22	0.00666667	0.268293	0.142857	0.0434783	40.2439	0.304348	9	53	8	62	T	ENST00000449901	1138	346	330	167	298	0.0288184	0.163142	0.0535714	0.210702	5.66103	3.93311
ENST00000451137:1003	0	12	0	475	T	ENST00000451137	1003	92	12	6	475	0.0107527	1	0.142857	1	93	7	3	36	2	43	T	ENST00000451137	1003	73	128	67	118	0.0540541	0.286822	0.0441176	0.369748	5.3062	8.38095
ENST00000452368:276	0	5	1	0	T	ENST00000452368	276	99	21	52	239	0.01	0.272727	0.0377358	0.00416667	27.2727	0.110417	8	46	16	67	T	ENST00000452368	276	128	145	135	237	0.0697674	0.321918	0.125	0.285714	4.61416	2.28571
ENST00000453046:73	0	8	1	0	T	ENST00000453046	73	38	16	24	136	0.025641	0.529412	0.08	0.00729927	20.6471	0.0912409	1	16	4	13	T	ENST00000453046	73	35	74	28	111	0.0555556	0.226667	0.172414	0.125	4.08	0.725
ENST00000458349:177	2	5	0	0	T	ENST00000458349	177	32	11	9	73	0.0909091	0.5	0.1	0.0135135	5.5	0.135135	3	15	4	12	T	ENST00000458349	177	38	42	46	66	0.102564	0.372093	0.106383	0.19403	3.62791	1.82388
ENST00000458478:346	3	14	6	115	T	ENST00000458478	346	185	44	114	393	0.0215054	0.333333	0.0608696	0.294416	15.5	4.83684	4	26	5	35	T	ENST00000458478	346	336	208	190	337	0.0148368	0.129187	0.0314136	0.106509	8.70718	3.39053
ENST00000467736:28	0	6	2	0	T	ENST00000467736	28	105	25	39	120	0.00943396	0.269231	0.075	0.00826446	28.5385	0.110193	1	14	6	19	T	ENST00000467736	28	59	88	87	155	0.0333333	0.168539	0.0795455	0.128205	5.05618	1.61172
ENST00000484279:26	16	9	8	364	T	ENST00000484279	26	199	30	83	751	0.085	0.322581	0.107143	0.485372	3.79507	4.53014	3	22	0	30	T	ENST00000484279	26	60	90	80	196	0.0655738	0.252747	0.0123457	0.15736	3.8544	12.7462
ENST00000487938:779	0	12	7	180	T	ENST00000487938	779	242	93	88	806	0.00411523	0.138298	0.0898876	0.224287	33.6064	2.4952	4	53	14	102	T	ENST00000487938	779	274	440	361	591	0.0181818	0.122449	0.0414365	0.173986	6.73469	4.19887
ENST00000491310:76	0	7	5	0	T	ENST00000491310	76	7	15	26	25	0.125	0.5	0.222222	0.0384615	4	0.173077	1	11	4	10	T	ENST00000491310	76	16	27	17	34	0.117647	0.428571	0.277778	0.314286	3.64286	1.13143
ENST00000494946:343	0	5	1	0	T	ENST00000494946	343	19	15	12	106	0.05	0.375	0.153846	0.00934579	7.5	0.0607477	0	16	2	7	T	ENST00000494946	343	14	48	23	53	0.0666667	0.346939	0.125	0.148148	5.20408	1.18519
ENST00000508076:125	0	15	0	0	T	ENST00000508076	125	10	15	10	21	0.0909091	1	0.0909091	0.0454545	11	0.5	0	13	2	14	T	ENST00000508076	125	18	49	59	111	0.0526316	0.28	0.05	0.133929	5.32	2.67857
ENST00000509877:86	4	11	3	0	T	ENST00000509877	86	174	56	117	952	0.0285714	0.210526	0.0338983	0.00104932	7.36842	0.0309549	10	65	43	76	T	ENST00000509877	86	391	522	338	632	0.0280612	0.126195	0.129794	0.121643	4.49713	0.937204
ENST00000513285:166	0	14	0	0	T	ENST00000513285	166	52	24	21	110	0.0188679	0.6	0.0454545	0.00900901	31.8	0.198198	1	17	8	29	T	ENST00000513285	166	63	121	88	158	0.03125	0.147541	0.101124	0.188679	4.72131	1.86583
ENST00000514857:281	0	6	0	0	T	ENST00000514857	281	15	6	2	24	0.0625	1	0.333333	0.04	16	0.12	0	5	3	3	T	ENST00000514857	281	21	27	25	28	0.0454545	0.214286	0.153846	0.137931	4.71429	0.896552
ENST00000519030:539	0	5	0	0	T	ENST00000519030	539	10	7	5	21	0.0909091	0.75	0.166667	0.0454545	8.25	0.272727	0	6	4	2	T	ENST00000519030	539	28	39	41	26	0.0344828	0.175	0.119048	0.111111	5.075	0.933333
ENST00000522056:826	4	5	0	0	T	ENST00000522056	826	28	8	16	65	0.172414	0.666667	0.0588235	0.0151515	3.86667	0.257576	0	11	2	10	T	ENST00000522056	826	23	55	26	70	0.0416667	0.214286	0.111111	0.15493	5.14286	1.39437
ENST00000526586:153	0	6	2	0	T	ENST00000526586	153	72	28	62	133	0.0136986	0.241379	0.047619	0.00746269	17.6207	0.156716	7	23	13	35	T	ENST00000526586	153	191	161	179	253	0.0416667	0.148148	0.0777778	0.141732	3.55556	1.82227
ENST00000527226:336	1	5	4	80	T	ENST00000527226	336	62	18	25	242	0.031746	0.315789	0.192308	0.333333	9.94737	1.73333	7	58	8	78	T	ENST00000527226	336	233	217	315	273	0.034188	0.270642	0.028481	0.288321	7.91628	10.1233
ENST00000527302:289	1	6	6	0	T	ENST00000527302	289	73	49	49	301	0.027027	0.14	0.14	0.00331126	5.18	0.0236518	2	37	10	55	T	ENST00000527302	289	115	212	155	332	0.0258621	0.178404	0.0705128	0.168168	6.89828	2.38493
ENST00000527914:303	0	5	3	5	T	ENST00000527914	303	51	24	32	125	0.0192308	0.24	0.121212	0.047619	12.48	0.392857	2	30	5	44	T	ENST00000527914	303	87	199	113	249	0.0340909	0.155	0.0526316	0.18	4.54667	3.42
ENST00000528957:630	3	7	3	12	T	ENST00000528957	630	58	32	35	139	0.0677966	0.242424	0.111111	0.0928571	3.57576	0.835714	1	38	11	38	T	ENST00000528957	630	87	205	127	285	0.0227273	0.18932	0.09375	0.136364	8.3301	1.45455
ENST00000529806:85	0	10	3	0	T	ENST00000529806	85	65	20	34	47	0.0151515	0.52381	0.114286	0.0208333	34.5714	0.182292	1	37	7	86	T	ENST00000529806	85	35	100	56	206	0.0555556	0.376238	0.140351	0.42029	6.77228	2.99457
ENST00000530225:285	5	6	3	0	T	ENST00000530225	285	148	48	67	462	0.0402685	0.142857	0.0588235	0.00215983	3.54762	0.0367171	6	25	12	35	T	ENST00000530225	285	173	165	180	214	0.0402299	0.156627	0.0718232	0.167442	3.89329	2.33131
ENST00000530225:289	0	5	5	0	T	ENST00000530225	289	72	44	59	299	0.0136986	0.133333	0.1	0.00333333	9.73333	0.0333333	3	41	7	46	T	ENST00000530225	289	135	229	155	319	0.0294118	0.182609	0.0512821	0.146875	6.2087	2.86406
ENST00000530225:420	0	6	4	0	T	ENST00000530225	420	93	24	61	142	0.0106383	0.28	0.0806452	0.00699301	26.32	0.0867133	4	28	11	31	T	ENST00000530225	420	178	180	182	228	0.027933	0.160221	0.0655738	0.139738	5.73591	2.131
ENST00000530705:339	0	6	3	72	T	ENST00000530705	339	71	13	17	257	0.0138889	0.5	0.222222	0.282946	36	1.27326	7	52	17	82	T	ENST00000530705	339	230	199	338	248	0.034632	0.265	0.0530973	0.333333	7.65188	6.27778
ENST00000532702:443	0	6	0	0	T	ENST00000532702	443	41	26	19	69	0.0238095	0.259259	0.05	0.0142857	10.8889	0.285714	2	13	2	6	T	ENST00000532702	443	117	94	115	100	0.0254237	0.147368	0.0258621	0.0693069	5.79649	2.67987
ENST00000533186:126	0	5	1	0	T	ENST00000533186	126	80	21	59	122	0.0123457	0.272727	0.0333333	0.00813008	22.0909	0.243902	2	22	11	36	T	ENST00000533186	126	161	174	183	282	0.0185185	0.131429	0.0652174	0.130742	7.09714	2.00471
ENST00000535623:156	0	5	0	0	T	ENST00000535623	156	12	9	2	79	0.0769231	0.6	0.333333	0.0125	7.8	0.0375	0	5	1	1	T	ENST00000535623	156	20	23	27	30	0.047619	0.25	0.0714286	0.0645161	5.25	0.903226
ENST00000535798:1492	0	7	3	0	T	ENST00000535798	1492	6	7	9	95	0.142857	1	0.4	0.0104167	7	0.0260417	0	5	2	5	T	ENST00000535798	1492	15	18	19	37	0.0625	0.315789	0.15	0.157895	5.05263	1.05263
ENST00000537922:13	0	8	1	0	T	ENST00000537922	13	57	30	26	162	0.0172414	0.290323	0.0740741	0.00613497	16.8387	0.0828221	2	21	1	26	T	ENST00000537922	13	29	46	25	76	0.1	0.468085	0.0769231	0.350649	4.68085	4.55844
ENST00000538026:100	3	15	2	6	T	ENST00000538026	100	91	26	29	87	0.0434783	0.592593	0.1	0.0795455	13.6296	0.795455	1	23	9	42	T	ENST00000538026	100	58	127	98	283	0.0338983	0.1875	0.10101	0.151408	5.53125	1.49894
ENST00000540430:560	3	5	1	0	T	ENST00000540430	560	18	7	6	60	0.210526	0.75	0.285714	0.0163934	3.5625	0.057377	0	5	0	2	T	ENST00000540430	560	28	38	29	63	0.0344828	0.153846	0.0333333	0.046875	4.46154	1.40625
ENST00000541182:244	1	14	0	0	T	ENST00000541182	244	22	20	9	95	0.0869565	0.714286	0.1	0.0104167	8.21429	0.104167	0	8	2	9	T	ENST00000541182	244	15	34	19	55	0.0625	0.257143	0.15	0.178571	4.11429	1.19048
ENST00000542220:493	0	6	0	0	T	ENST00000542220	493	49	13	22	47	0.02	0.5	0.0434783	0.0208333	25	0.479167	0	5	1	4	T	ENST00000542220	493	26	37	29	50	0.037037	0.157895	0.0666667	0.0980392	4.26316	1.47059
ENST00000543485:1663	0	9	1	33	T	ENST00000543485	1663	128	35	47	448	0.00775194	0.277778	0.0416667	0.0757238	35.8333	1.81737	1	19	6	31	T	ENST00000543485	1663	92	96	111	163	0.0215054	0.206186	0.0625	0.195122	9.58763	3.12195
ENST00000545378:146	0	5	1	0	T	ENST00000545378	146	23	5	12	15	0.0416667	1	0.153846	0.0625	24	0.40625	1	19	0	36	T	ENST00000545378	146	131	141	46	141	0.0151515	0.140845	0.0212766	0.260563	9.29577	12.2465
ENST00000549389:256	1	15	3	391	T	ENST00000549389	256	62	17	34	434	0.031746	0.888889	0.114286	0.901149	28	7.88506	0	12	0	11	T	ENST00000549389	256	64	103	53	130	0.0153846	0.125	0.0185185	0.0916031	8.125	4.94656
ENST00000549759:298	0	6	1	0	T	ENST00000549759	298	4	6	8	21	0.2	1	0.222222	0.0454545	5	0.204545	0	13	0	7	T	ENST00000549759	298	31	39	18	34	0.03125	0.35	0.0526316	0.228571	11.2	4.34286
ENST00000550767:923	4	5	0	61	T	ENST00000550767	923	113	33	29	524	0.0438596	0.176471	0.0333333	0.118095	4.02353	3.54286	0	22	6	16	T	ENST00000550767	923	129	145	77	149	0.00769231	0.157534	0.0897436	0.113333	20.4795	1.26286
ENST00000551917:713	0	5	0	0	T	ENST00000551917	713	6	11	9	114	0.142857	0.5	0.1	0.00869565	3.5	0.0869565	0	5	0	8	T	ENST00000551917	713	41	33	28	46	0.0238095	0.176471	0.0344828	0.191489	7.41176	5.55319
ENST00000552164:399	0	7	1	0	T	ENST00000552164	399	53	27	38	80	0.0185185	0.285714	0.0512821	0.0123457	15.4286	0.240741	4	14	5	16	T	ENST00000552164	399	148	88	67	78	0.033557	0.168539	0.0882353	0.21519	5.02247	2.43882
ENST00000552588:280	0	5	1	33	T	ENST00000552588	280	54	24	23	191	0.0181818	0.24	0.0833333	0.177083	13.2	2.125	9	62	12	61	T	ENST00000552588	280	122	169	89	227	0.0813008	0.370588	0.144444	0.27193	4.55824	1.88259
ENST00000559463:350	0	17	2	0	T	ENST00000559463	350	244	64	106	690	0.00408163	0.276923	0.0280374	0.00144718	67.8462	0.051616	5	40	5	40	T	ENST00000559463	350	214	300	250	428	0.027907	0.136213	0.0239044	0.0955711	4.88095	3.99806
ENST00000561424:213	7	5	1	0	T	ENST00000561424	213	132	27	48	275	0.0601504	0.214286	0.0408163	0.00362319	3.5625	0.0887681	32	76	33	111	T	ENST00000561424	213	418	270	295	319	0.0787589	0.284133	0.114865	0.35	3.60763	3.04706
ENST00000562879:26	0	6	5	8	T	ENST00000562879	26	82	24	57	137	0.0120482	0.28	0.103448	0.0652174	23.24	0.630435	1	19	3	19	T	ENST00000562879	26	44	83	68	118	0.0444444	0.238095	0.057971	0.168067	5.35714	2.89916
ENST00000564864:391	6	10	1	0	T	ENST00000564864	391	74	29	24	6	0.0933333	0.366667	0.08	0.142857	3.92857	1.78571	1	5	1	10	T	ENST00000564864	391	45	33	48	60	0.0434783	0.176471	0.0408163	0.180328	4.05882	4.41803
ENST00000564864:565	1	6	0	94	T	ENST00000564864	565	124	36	22	237	0.016	0.189189	0.0434783	0.39916	11.8243	9.18067	1	5	1	4	T	ENST00000564864	565	56	39	45	68	0.0350877	0.15	0.0434783	0.0724638	4.275	1.66667
ENST00000567118:34	2	6	0	0	T	ENST00000567118	34	12	6	10	52	0.230769	1	0.0909091	0.0188679	4.33333	0.207547	1	9	6	14	T	ENST00000567118	34	35	33	27	44	0.0555556	0.294118	0.25	0.333333	5.29412	1.33333
ENST00000567815:288	5	6	1	79	T	ENST00000567815	288	79	25	74	489	0.075	0.269231	0.0266667	0.163265	3.58974	6.12245	8	35	18	62	T	ENST00000567815	288	201	184	182	258	0.0445545	0.194595	0.103825	0.243243	4.36757	2.34282
ENST00000572537:512	8	15	1	0	T	ENST00000572537	512	259	46	28	55	0.0346154	0.340426	0.0689655	0.0178571	9.83452	0.258929	50	144	32	135	T	ENST00000572537	512	1309	1051	660	819	0.0389313	0.137833	0.0499244	0.165854	3.54041	3.3221
ENST00000576541:142	0	6	1	13	T	ENST00000576541	142	12	13	9	13	0.0769231	0.5	0.2	1	6.5	5	2	8	1	10	T	ENST00000576541	142	41	33	22	38	0.0714286	0.264706	0.0869565	0.282051	3.70588	3.24359
ENST00000579374:295	1	5	1	23	T	ENST00000579374	295	56	12	22	32	0.0350877	0.461538	0.0869565	0.727273	13.1538	8.36364	1	16	4	36	T	ENST00000579374	295	59	115	106	169	0.0333333	0.146552	0.046729	0.217647	4.39655	4.65765
ENST00000583389:606	0	8	0	0	T	ENST00000583389	606	9	12	8	59	0.1	0.692308	0.111111	0.0166667	6.92308	0.15	0	5	3	12	T	ENST00000583389	606	32	47	36	68	0.030303	0.125	0.108108	0.188406	4.125	1.74275
ENST00000586057:337	0	8	0	60	T	ENST00000586057	337	22	21	15	171	0.0434783	0.409091	0.0625	0.354651	9.40909	5.67442	0	11	4	31	T	ENST00000586057	337	51	51	51	83	0.0192308	0.230769	0.0961538	0.380952	12	3.9619
ENST00000589828:145	0	5	0	47	T	ENST00000589828	145	31	6	12	115	0.03125	0.857143	0.0769231	0.413793	27.4286	5.37931	0	5	4	7	T	ENST00000589828	145	22	30	25	57	0.0434783	0.193548	0.192308	0.137931	4.45161	0.717241
ENST00000591051:1918	0	11	1	0	T	ENST00000591051	1918	15	11	6	119	0.0625	1	0.285714	0.00833333	16	0.0291667	0	7	0	3	T	ENST00000591051	1918	28	40	22	48	0.0344828	0.195122	0.0434783	0.0816327	5.65854	1.87755
ENST00000597648:280	0	5	0	0	T	ENST00000597648	280	57	21	55	267	0.0172414	0.272727	0.0178571	0.00373134	15.8182	0.208955	0	16	6	17	T	ENST00000597648	280	58	77	88	103	0.0169492	0.217949	0.0786517	0.173077	12.859	2.20055
ENST00000600147:367	0	5	1	0	T	ENST00000600147	367	71	24	57	232	0.0138889	0.24	0.0344828	0.00429184	17.28	0.124464	3	17	1	15	T	ENST00000600147	367	86	82	76	102	0.045977	0.216867	0.025974	0.15534	4.71687	5.98058
ENST00000602569:272	0	8	2	0	T	ENST00000602569	272	89	16	43	209	0.0111111	0.529412	0.0681818	0.00476191	47.6471	0.0698413	1	16	7	28	T	ENST00000602569	272	43	90	66	108	0.0454545	0.186813	0.119403	0.266055	4.10989	2.22821
ENST00000602911:659	0	5	0	0	T	ENST00000602911	659	37	5	11	174	0.0263158	1	0.0833333	0.00571429	38	0.0685714	0	5	0	10	T	ENST00000602911	659	20	35	22	42	0.047619	0.166667	0.0434783	0.255814	3.5	5.88372
TGME49_200250:1566	0	15	0	0	T	TGME49_200250	1566	52	15	12	26	0.0188679	1	0.0769231	0.037037	53	0.481481	0	13	0	31	T	TGME49_200250	1566	19	49	26	82	0.05	0.28	0.037037	0.385542	5.6	10.4096
TGME49_200360:83	0	15	0	129	T	TGME49_200360	83	49	15	13	387	0.02	1	0.0714286	0.335052	50	4.69072	0	6	3	23	T	TGME49_200360	83	33	53	50	77	0.0294118	0.12963	0.0784314	0.307692	4.40741	3.92308
TGME49_200385:952	0	15	0	0	T	TGME49_200385	952	18	20	4	703	0.0526316	0.761905	0.2	0.00142045	14.4762	0.00710227	0	6	0	2	T	TGME49_200385	952	16	30	13	46	0.0588235	0.225806	0.0714286	0.0638298	3.83871	0.893617
TGME49_201390:761	0	7	5	0	T	TGME49_201390	761	87	9	32	83	0.0113636	0.8	0.181818	0.0119048	70.4	0.0654762	3	17	8	17	T	TGME49_201390	761	110	124	221	255	0.036036	0.144	0.0405405	0.0703125	3.996	1.73438
TGME49_201390:839	0	14	2	0	T	TGME49_201390	839	15	14	30	61	0.0625	1	0.0967742	0.016129	16	0.166667	1	28	13	21	T	TGME49_201390	839	123	150	177	173	0.016129	0.192053	0.0786517	0.126437	11.9073	1.60755
TGME49_201390:868	0	16	1	0	T	TGME49_201390	868	24	59	16	24	0.04	0.283333	0.117647	0.04	7.08333	0.34	1	14	5	37	T	TGME49_201390	868	146	118	184	189	0.0136054	0.12605	0.0324324	0.2	9.26471	6.16667
TGME49_201860:832	1	10	1	95	T	TGME49_201860	832	248	66	186	2218	0.00803213	0.164179	0.0106952	0.0432627	20.4403	4.04507	21	121	46	149	T	TGME49_201860	832	670	952	506	982	0.0327869	0.128017	0.0927022	0.152594	3.90451	1.64607
TGME49_202500:1696	0	15	1	0	T	TGME49_202500	1696	99	25	53	424	0.01	0.615385	0.037037	0.00235294	61.5385	0.0635294	3	120	6	170	T	TGME49_202500	1696	212	315	127	478	0.0187793	0.382911	0.0546875	0.356994	20.39	6.52789
TGME49_203030:1308	0	19	0	31	T	TGME49_203030	1308	23	41	8	31	0.0416667	0.47619	0.111111	1	11.4286	9	0	12	0	15	T	TGME49_203030	1308	39	67	18	111	0.025	0.191176	0.0526316	0.142857	7.64706	2.71429
TGME49_203030:1313	0	6	0	0	T	TGME49_203030	1313	23	42	8	31	0.0416667	0.162791	0.111111	0.03125	3.90698	0.28125	0	10	0	4	T	TGME49_203030	1313	45	88	20	105	0.0217391	0.123596	0.047619	0.0471698	5.68539	0.990566
TGME49_203290:1857	38	19	1	325	T	TGME49_203290	1857	182	22	19	325	0.213115	0.869565	0.1	1	4.08027	10	12	73	19	41	T	TGME49_203290	1857	199	322	193	219	0.065	0.229102	0.103093	0.190909	3.52465	1.85182
TGME49_203290:2216	0	52	4	9	T	TGME49_203290	2216	131	92	51	9	0.00757576	0.569892	0.0961538	1	75.2258	10.4	36	299	44	291	T	TGME49_203290	2216	361	803	255	708	0.10221	0.373134	0.175781	0.411848	3.65067	2.34296
TGME49_203310:3464	0	16	4	0	T	TGME49_203310	3464	154	73	72	841	0.00645161	0.22973	0.0684932	0.00118765	35.6081	0.0173397	9	58	25	104	T	TGME49_203310	3464	290	265	335	536	0.0343643	0.221805	0.077381	0.195531	6.45451	2.52686
TGME49_203540:351	0	6	1	0	T	TGME49_203540	351	35	6	8	415	0.0277778	1	0.222222	0.00240385	36	0.0108173	0	11	1	10	T	TGME49_203540	351	20	51	20	45	0.047619	0.230769	0.0952381	0.23913	4.84615	2.51087
TGME49_204020:647	0	24	4	0	T	TGME49_204020	647	490	180	108	2392	0.00203666	0.138122	0.0458716	0.000417885	67.8177	0.0091099	14	107	12	88	T	TGME49_204020	647	481	571	237	485	0.0311203	0.188811	0.0546218	0.183128	6.06713	3.35264
TGME49_204050:2188	0	12	0	6	T	TGME49_204050	2188	140	38	13	7	0.0070922	0.333333	0.0714286	0.875	47	12.25	0	35	3	187	T	TGME49_204050	2188	27	72	87	281	0.0357143	0.493151	0.0454545	0.666667	13.8082	14.6667
TGME49_205250:2005	0	15	1	0	T	TGME49_205250	2005	82	34	37	267	0.0120482	0.457143	0.0526316	0.00373134	37.9429	0.0708955	1	6	11	16	T	TGME49_205250	2005	52	43	105	142	0.0377358	0.159091	0.113208	0.118881	4.21591	1.05012
TGME49_205470:1490	0	8	0	2	T	TGME49_205470	1490	237	70	45	117	0.00420168	0.126761	0.0217391	0.0254237	30.169	1.16949	1	41	3	34	T	TGME49_205470	1490	133	179	61	100	0.0149254	0.233333	0.0645161	0.346535	15.6333	5.37129
TGME49_205490:2949	0	7	0	0	T	TGME49_205490	2949	33	10	7	427	0.0294118	0.727273	0.125	0.00233645	24.7273	0.0186916	0	17	1	25	T	TGME49_205490	2949	12	55	43	86	0.0769231	0.321429	0.0454545	0.298851	4.17857	6.57471
TGME49_205700:1499	1	14	2	408	T	TGME49_205700	1499	91	31	62	880	0.0217391	0.46875	0.047619	0.464245	21.5625	9.74915	27	228	44	118	T	TGME49_205700	1499	400	927	309	571	0.0698254	0.246767	0.145161	0.208042	3.53406	1.43318
TGME49_205700:1878	1	15	5	333	T	TGME49_205700	1878	41	77	79	841	0.047619	0.205128	0.075	0.396675	4.30769	5.28899	13	134	16	122	T	TGME49_205700	1878	539	471	208	393	0.0259259	0.286017	0.0813397	0.312183	11.0321	3.83801
TGME49_207060:775	0	19	1	0	T	TGME49_207060	775	75	26	11	3	0.0131579	0.740741	0.166667	0.25	56.2963	1.5	2	19	1	25	T	TGME49_207060	775	67	110	53	107	0.0441176	0.18018	0.037037	0.240741	4.08408	6.5
TGME49_207170:993	0	18	2	0	T	TGME49_207170	993	3	18	24	65	0.25	1	0.12	0.0151515	4	0.126263	4	54	8	76	T	TGME49_207170	993	119	275	55	356	0.0416667	0.199275	0.160714	0.215686	4.78261	1.34205
TGME49_207440:1345	15	36	2	289	T	TGME49_207440	1345	164	79	93	294	0.0969697	0.4625	0.0319149	0.983051	4.76953	30.8023	28	393	30	387	T	TGME49_207440	1345	526	1471	308	1264	0.0550285	0.267663	0.100324	0.306719	4.86408	3.0573
TGME49_207440:321	0	30	1	0	T	TGME49_207440	321	83	52	30	476	0.0119048	0.584906	0.0645161	0.00209644	49.1321	0.0324948	4	62	2	48	T	TGME49_207440	321	65	188	51	139	0.0757576	0.333333	0.0576923	0.35	4.4	6.06667
TGME49_207440:506	8	13	3	0	T	TGME49_207440	506	495	59	69	284	0.0181452	0.233333	0.0571429	0.00350877	12.8593	0.0614035	20	91	9	63	T	TGME49_207440	506	371	430	227	332	0.0564516	0.213457	0.0438596	0.192192	3.78124	4.38198
TGME49_207840:101	6	23	5	455	T	TGME49_207840	101	174	59	82	928	0.04	0.4	0.0722892	0.49085	10	6.7901	9	244	17	297	T	TGME49_207840	101	284	1239	322	1284	0.0350877	0.197581	0.0557276	0.231907	5.63105	4.16144
TGME49_207840:460	11	8	1	50	T	TGME49_207840	460	208	37	84	50	0.0574163	0.236842	0.0235294	1	4.125	42.5	5	270	24	206	T	TGME49_207840	460	906	866	423	696	0.00661521	0.312572	0.0589623	0.296987	47.2505	5.0369
TGME49_208030:304	0	13	2	0	T	TGME49_208030	304	97	21	49	224	0.0102041	0.636364	0.06	0.00444444	62.3636	0.0740741	3	24	10	26	T	TGME49_208030	304	127	200	244	502	0.03125	0.124378	0.044898	0.0536779	3.9801	1.19555
TGME49_208030:643	0	14	3	0	T	TGME49_208030	643	152	50	50	525	0.00653595	0.294118	0.0784314	0.00190114	45	0.0242395	2	27	6	54	T	TGME49_208030	643	96	164	236	349	0.0309278	0.169697	0.0295359	0.157143	5.48687	5.32041
TGME49_208740:107	46	39	4	20	T	TGME49_208740	107	274	53	24	20	0.170909	0.740741	0.2	1	4.33412	5	12	200	0	19	T	TGME49_208740	107	315	689	44	83	0.0411392	0.291304	0.0222222	0.238095	7.08094	10.7143
TGME49_209030:1132	0	15	6	0	T	TGME49_209030	1132	306	48	156	877	0.00325733	0.326531	0.044586	0.00113895	100.245	0.0255451	3	48	18	50	T	TGME49_209030	1132	252	378	372	696	0.0158103	0.129288	0.0509383	0.0731707	8.17744	1.43646
TGME49_209030:1418	1	17	8	231	T	TGME49_209030	1418	227	36	144	600	0.00877193	0.486486	0.062069	0.386023	55.4595	6.21926	37	249	44	264	T	TGME49_209030	1418	522	653	483	655	0.0726577	0.382263	0.0929752	0.403963	5.26115	4.34485
TGME49_209260:447	0	27	1	0	T	TGME49_209260	447	90	63	23	18	0.010989	0.4375	0.0833333	0.0526316	39.8125	0.631579	6	28	4	17	T	TGME49_209260	447	109	110	42	87	0.0636364	0.261261	0.116279	0.204545	4.10553	1.75909
TGME49_209890:2610	0	10	0	0	T	TGME49_209890	2610	29	10	12	52	0.0333333	1	0.0769231	0.0188679	30	0.245283	1	9	0	10	T	TGME49_209890	2610	57	51	36	60	0.0344828	0.192308	0.027027	0.180328	5.57692	6.67213
TGME49_209910:911	1	11	5	734	T	TGME49_209910	911	87	44	76	1732	0.0227273	0.266667	0.0779221	0.42412	11.7333	5.44287	17	148	37	256	T	TGME49_209910	911	470	734	347	972	0.0382166	0.202721	0.109195	0.264132	5.30454	2.41889
TGME49_209950:784	1	13	2	349	T	TGME49_209950	784	92	20	22	595	0.0215054	0.666667	0.130435	0.587248	31	4.50224	1	6	7	2	T	TGME49_209950	784	91	57	39	71	0.0217391	0.12069	0.2	0.0416667	5.55172	0.208333
TGME49_210370:1853	0	19	4	0	T	TGME49_210370	1853	23	37	21	408	0.0416667	0.526316	0.227273	0.00244499	12.6316	0.0107579	0	7	2	7	T	TGME49_210370	1853	29	38	32	77	0.0333333	0.205128	0.0909091	0.102564	6.15385	1.12821
TGME49_210408:1892	2	21	14	308	T	TGME49_210408	1892	47	40	56	747	0.0625	0.536585	0.263158	0.413102	8.58537	1.56979	1	20	9	16	T	TGME49_210408	1892	187	168	150	150	0.0106383	0.12426	0.0662252	0.112583	11.6805	1.7
TGME49_210690:320	8	9	5	0	T	TGME49_210690	320	163	48	40	723	0.054878	0.204082	0.146341	0.00138122	3.71882	0.00943831	7	59	3	39	T	TGME49_210690	320	209	293	166	272	0.0380952	0.204082	0.0239521	0.14652	5.35714	6.11722
TGME49_211040:565	0	11	2	0	T	TGME49_211040	565	61	18	33	566	0.016129	0.631579	0.0882353	0.00176367	39.1579	0.0199882	2	40	7	31	T	TGME49_211040	565	89	337	89	422	0.0333333	0.121302	0.0888889	0.0756501	3.63905	0.851064
TGME49_212290:1689	0	27	0	0	T	TGME49_212290	1689	273	70	108	18	0.00364964	0.394366	0.00917431	0.0526316	108.056	5.73684	33	152	11	111	T	TGME49_212290	1689	630	768	335	665	0.0538827	0.19896	0.0357143	0.168168	3.69246	4.70871
TGME49_212290:2041	1	27	7	662	T	TGME49_212290	2041	348	92	93	2160	0.00573066	0.301075	0.0851064	0.306802	52.5376	3.60493	55	725	52	777	T	TGME49_212290	2041	847	1451	549	1337	0.0660377	0.5	0.0963636	0.581465	7.57143	6.03407
TGME49_212290:80	0	11	0	0	T	TGME49_212290	80	20	12	7	20	0.047619	0.923077	0.125	0.047619	19.3846	0.380952	1	6	3	14	T	TGME49_212290	80	21	16	21	30	0.0909091	0.411765	0.181818	0.483871	4.52941	2.66129
TGME49_213350:763	0	26	4	0	T	TGME49_213350	763	229	88	92	452	0.00434783	0.303371	0.0537634	0.00220751	69.7753	0.0410596	15	176	12	133	T	TGME49_213350	763	611	1020	481	953	0.0261438	0.173359	0.026971	0.140461	6.631	5.20787
TGME49_213580:438	4	72	32	843	T	TGME49_213580	438	299	111	187	918	0.0166667	0.651786	0.175532	0.91839	39.1071	5.23204	36	762	71	1013	T	TGME49_213580	438	923	2185	823	2252	0.0400433	0.349039	0.0873786	0.450067	8.71655	5.15076
TGME49_213940:603	0	7	4	0	T	TGME49_213940	603	130	52	72	54	0.00763359	0.150943	0.0684932	0.0181818	19.7736	0.265455	6	71	14	111	T	TGME49_213940	603	319	499	267	622	0.021875	0.144	0.0559701	0.179775	6.58286	3.21199
TGME49_214080:552	0	7	2	0	T	TGME49_214080	552	62	12	58	704	0.015873	0.615385	0.0508475	0.00141844	38.7692	0.027896	10	67	7	121	T	TGME49_214080	552	181	320	181	515	0.0604396	0.211838	0.043956	0.236434	3.50496	5.37888
TGME49_214220:323	31	25	5	0	T	TGME49_214220	323	359	73	97	436	0.0888889	0.351351	0.0612245	0.00228833	3.9527	0.037376	28	191	36	184	T	TGME49_214220	323	843	1549	466	1231	0.0343602	0.123871	0.0792291	0.150162	3.60507	1.89529
TGME49_214320:2738	0	15	0	342	T	TGME49_214320	2738	20	29	11	367	0.047619	0.533333	0.0833333	0.932065	11.2	11.1848	2	15	5	11	T	TGME49_214320	2738	58	81	16	66	0.0508475	0.195122	0.352941	0.179104	3.8374	0.507463
TGME49_214940:1871	1	5	3	399	T	TGME49_214940	1871	136	29	70	399	0.0145985	0.2	0.056338	1	13.7	17.75	18	86	32	159	T	TGME49_214940	1871	359	417	365	589	0.0527778	0.208134	0.0901639	0.271186	3.94359	3.0077
TGME49_214940:740	0	14	1	0	T	TGME49_214940	740	112	14	57	9	0.00884956	1	0.0344828	0.1	113	2.9	7	59	11	70	T	TGME49_214940	740	214	306	291	483	0.0372093	0.19544	0.0410959	0.146694	5.25244	3.56956
TGME49_215460:575	20	20	7	0	T	TGME49_215460	575	227	59	104	525	0.0921053	0.35	0.0761905	0.00190114	3.8	0.0249525	14	173	28	168	T	TGME49_215460	575	295	645	181	734	0.0506757	0.26935	0.159341	0.229932	5.31517	1.44302
TGME49_215470:313	0	20	11	55	T	TGME49_215470	313	205	151	106	303	0.00485437	0.138158	0.11215	0.184211	28.4605	1.64254	24	651	31	742	T	TGME49_215470	313	909	1712	396	1562	0.0274725	0.380619	0.0806045	0.475368	13.8545	5.89753
TGME49_215470:638	0	19	2	0	T	TGME49_215470	638	429	105	132	1123	0.00232558	0.188679	0.0225564	0.00088968	81.1321	0.0394425	24	273	34	202	T	TGME49_215470	638	764	938	523	661	0.0326797	0.2918	0.0667939	0.306647	8.92907	4.59094
TGME49_215470:675	0	18	8	0	T	TGME49_215470	675	266	53	136	470	0.00374532	0.351852	0.0656934	0.00212314	93.9444	0.0323189	1	133	10	108	T	TGME49_215470	675	419	1046	293	883	0.00476191	0.127985	0.037415	0.123303	26.8768	3.29556
[truncated: 338 more rows]
