# Supplementary material
Source: HighWire-hosted journal article supplement (doi:10.1101/rna.062794.117)
Supplement: Supplemental_Table_S4.xlsx [file Supplemental_Table_S4.xlsx]

## Sheet: tachy_PUS1_mrna_psis
full	wt_noCMC.x	wt_CMC.x	mut_noCMC.x	mut_CMC.x	nt.x	transcript.x	pos.x	wt_noCMC_depth.x	wt_CMC_depth.x	mut_noCMC_depth.x	mut_CMC_depth.x	wt_noCMC_pen.x	wt_CMC_pen.x	mut_noCMC_pen.x	mut_CMC_pen.x	wt_pen_ratio.x	mut_pen_ratio.x	wt_noCMC.y	wt_CMC.y	mut_noCMC.y	mut_CMC.y	nt.y	transcript.y	pos.y	wt_noCMC_depth.y	wt_CMC_depth.y	mut_noCMC_depth.y	mut_CMC_depth.y	wt_noCMC_pen.y	wt_CMC_pen.y	mut_noCMC_pen.y	mut_CMC_pen.y	wt_pen_ratio.y	mut_pen_ratio.y	binom
TGME49_200360:477	0	25	0	11	T	TGME49_200360	477	25	82	65	108	0.0384615	0.313253	0.0151515	0.110092	8.14458	7.26606	0	39	0	0	T	TGME49_200360	477	231	165	38	167	0.00431035	0.240964	0.025641	0.00595238	55.9036	0.232143	2.3e-22
TGME49_201390:1560	0	18	12	4	T	TGME49_201390	1560	113	124	67	162	0.00877193	0.152	0.191176	0.0306748	17.328	0.160453	3	68	0	0	T	TGME49_201390	1560	402	321	190	167	0.00992556	0.214286	0.0052356	0.00595238	21.5893	1.1369	3.44e-25
TGME49_201390:491	0	23	0	3	T	TGME49_201390	491	117	109	111	135	0.00847458	0.218182	0.00892857	0.0294118	25.7455	3.29412	12	48	34	22	T	TGME49_201390	491	491	359	336	383	0.0264228	0.136111	0.103858	0.0598958	5.15128	0.576711	7.11e-14
TGME49_201390:558	0	9	6	0	T	TGME49_201390	558	21	57	23	47	0.0454545	0.172414	0.291667	0.0208333	3.7931	0.0714286	18	83	0	0	T	TGME49_201390	558	434	338	184	227	0.0436782	0.247788	0.00540541	0.00438597	5.67303	0.811404	2.8e-32
TGME49_201785:522	0	8	0	0	T	TGME49_201785	522	105	64	43	83	0.00943396	0.138462	0.0227273	0.0119048	14.6769	0.52381	5	40	56	11	T	TGME49_201785	522	87	117	118	122	0.0681818	0.347458	0.478992	0.097561	5.09605	0.20368	3.01e-15
TGME49_201860:1376	0	9	5	1	T	TGME49_201860	1376	88	78	28	109	0.011236	0.126582	0.206897	0.0181818	11.2658	0.0878788	1	36	0	5	T	TGME49_201860	1376	246	267	108	184	0.00809717	0.13806	0.00917431	0.0324324	17.0504	3.53514	1.81e-11
TGME49_201860:875	0	23	2	3	T	TGME49_201860	875	84	144	40	128	0.0117647	0.165517	0.0731707	0.0310078	14.069	0.423773	17	44	0	0	T	TGME49_201860	875	349	242	97	192	0.0514286	0.185185	0.0102041	0.00518135	3.60082	0.507772	1.68e-22
TGME49_202620:2400	0	7	1	1	T	TGME49_202620	2400	38	31	6	31	0.025641	0.25	0.285714	0.0625	9.75	0.21875	0	12	0	0	T	TGME49_202620	2400	75	62	65	33	0.0131579	0.206349	0.0151515	0.0294118	15.6825	1.94118	7.75e-06
TGME49_203060:2218	0	11	0	4	T	TGME49_203060	2218	85	56	3	45	0.0116279	0.210526	0.25	0.108696	18.1053	0.434783	0	11	2	0	T	TGME49_203060	2218	63	65	54	59	0.015625	0.181818	0.0545455	0.0166667	11.6364	0.305556	1.17e-05
TGME49_203290:1531	0	20	5	4	T	TGME49_203290	1531	65	158	67	129	0.0151515	0.132075	0.0882353	0.0384615	8.71698	0.435897	1	37	0	0	T	TGME49_203290	1531	398	238	206	159	0.00501253	0.158996	0.00483092	0.00625	31.7197	1.29375	8.9e-15
TGME49_203540:2831	0	9	0	1	T	TGME49_203540	2831	29	21	3	20	0.0333333	0.454545	0.25	0.0952381	13.6364	0.380952	0	11	0	0	T	TGME49_203540	2831	14	31	4	10	0.0666667	0.375	0.2	0.0909091	5.625	0.454545	9.33e-06
TGME49_203720:536	0	7	0	0	T	TGME49_203720	536	36	36	5	12	0.027027	0.216216	0.166667	0.0769231	8	0.461538	0	31	0	0	T	TGME49_203720	536	272	256	16	109	0.003663	0.124514	0.0588235	0.00909091	33.9922	0.154545	4.72e-08
TGME49_204050:430	0	33	0	21	T	TGME49_204050	430	109	173	107	198	0.00909091	0.195402	0.00925926	0.110553	21.4943	11.9397	11	31	0	2	T	TGME49_204050	430	209	120	73	45	0.0571429	0.264463	0.0135135	0.0652174	4.6281	4.82609	2.77e-07
TGME49_204130:4319	0	11	0	0	T	TGME49_204130	4319	10	29	7	19	0.0909091	0.4	0.125	0.05	4.4	0.4	0	8	0	0	T	TGME49_204130	4319	27	17	30	63	0.0357143	0.5	0.0322581	0.015625	14	0.484375	1.06e-19
TGME49_204340:2756	0	10	0	0	T	TGME49_204340	2756	37	51	7	32	0.0263158	0.211538	0.125	0.030303	8.03846	0.242424	0	17	0	0	T	TGME49_204340	2756	97	53	13	42	0.0102041	0.333333	0.0714286	0.0232558	32.6667	0.325581	2.19e-10
TGME49_204530:746	0	11	0	4	T	TGME49_204530	746	91	99	70	140	0.0108696	0.12	0.0140845	0.035461	11.04	2.51773	8	20	19	0	T	TGME49_204530	746	237	153	179	138	0.0378151	0.136364	0.111111	0.00719425	3.60606	0.0647482	1.49e-11
TGME49_205250:1311	0	7	0	2	T	TGME49_205250	1311	51	34	19	46	0.0192308	0.228571	0.05	0.0638298	11.8857	1.2766	0	7	0	0	T	TGME49_205250	1311	13	25	1	84	0.0714286	0.307692	0.5	0.0117647	4.30769	0.0235294	4.34e-13
TGME49_205330:790	0	8	0	2	T	TGME49_205330	790	11	24	16	30	0.0833333	0.36	0.0588235	0.0967742	4.32	1.64516	3	11	1	0	T	TGME49_205330	790	61	28	5	74	0.0645161	0.413793	0.333333	0.0133333	6.41379	0.04	5.31e-18
TGME49_205330:942	0	8	0	2	T	TGME49_205330	942	17	29	8	48	0.0555556	0.3	0.111111	0.0612245	5.4	0.55102	0	18	0	0	T	TGME49_205330	942	110	87	7	51	0.00900901	0.215909	0.125	0.0192308	23.9659	0.153846	5.33e-09
TGME49_205470:3281	0	9	0	1	T	TGME49_205470	3281	22	34	12	33	0.0434783	0.285714	0.0769231	0.0588235	6.57143	0.764706	3	12	0	0	T	TGME49_205470	3281	151	96	77	106	0.0263158	0.134021	0.0128205	0.00934579	5.09278	0.728972	6.43e-10
TGME49_205700:1342	0	6	0	0	T	TGME49_205700	1342	41	15	4	18	0.0238095	0.4375	0.2	0.0526316	18.375	0.263158	3	10	0	0	T	TGME49_205700	1342	75	39	136	52	0.0526316	0.275	0.00729927	0.0188679	5.225	2.58491	2.08e-11
TGME49_205700:1927	0	15	0	7	T	TGME49_205700	1927	62	68	49	88	0.015873	0.231884	0.02	0.0898876	14.6087	4.49438	0	42	0	0	T	TGME49_205700	1927	275	260	87	241	0.00362319	0.164751	0.0113636	0.00413223	45.4713	0.363636	8.34e-19
TGME49_208030:1370	0	21	0	3	T	TGME49_208030	1370	38	77	33	71	0.025641	0.282051	0.0294118	0.0555556	11	1.88889	2	29	54	0	T	TGME49_208030	1370	170	133	92	159	0.0175439	0.223881	0.591398	0.00625	12.7612	0.0105682	4.38e-23
TGME49_208030:2346	0	14	0	3	T	TGME49_208030	2346	79	100	69	105	0.0125	0.148515	0.0142857	0.0377358	11.8812	2.64151	6	35	15	15	T	TGME49_208030	2346	356	209	116	211	0.0196078	0.171429	0.136752	0.0754717	8.74286	0.551887	2.48e-08
TGME49_208450:194	0	24	0	7	T	TGME49_208450	194	149	119	77	193	0.00666667	0.208333	0.0128205	0.0412371	31.25	3.21649	0	25	0	8	T	TGME49_208450	194	85	95	7	78	0.0116279	0.270833	0.125	0.113924	23.2917	0.911392	6.12e-15
TGME49_208740:1813	0	7	0	1	T	TGME49_208740	1813	43	36	5	27	0.0227273	0.216216	0.166667	0.0714286	9.51351	0.428571	0	14	0	0	T	TGME49_208740	1813	51	46	1	30	0.0192308	0.319149	0.5	0.0322581	16.5957	0.0645161	9.79e-07
TGME49_208740:67	0	7	4	0	T	TGME49_208740	67	23	21	10	20	0.0416667	0.363636	0.454545	0.047619	8.72727	0.104762	0	8	0	0	T	TGME49_208740	67	97	71	9	18	0.0102041	0.125	0.1	0.0526316	12.25	0.526316	0.00115534
TGME49_209910:994	0	5	0	0	T	TGME49_209910	994	21	36	12	27	0.0454545	0.162162	0.0769231	0.0357143	3.56757	0.464286	0	18	0	0	T	TGME49_209910	994	113	76	129	81	0.00877193	0.246753	0.00769231	0.0121951	28.1299	1.58537	1.65e-11
TGME49_209950:1989	0	7	2	0	T	TGME49_209950	1989	20	30	16	8	0.047619	0.258065	0.176471	0.111111	5.41935	0.62963	0	9	0	0	T	TGME49_209950	1989	34	40	10	20	0.0285714	0.243902	0.0909091	0.047619	8.53659	0.52381	0.000698683
TGME49_210690:646	5	31	2	5	T	TGME49_210690	646	217	138	74	92	0.0275229	0.230216	0.04	0.0645161	8.36451	1.6129	29	166	0	9	T	TGME49_210690	646	776	641	232	338	0.03861	0.260125	0.00429184	0.0294985	6.73723	6.87316	7.07e-36
TGME49_211030:877	0	5	0	0	T	TGME49_211030	877	28	15	2	10	0.0344828	0.375	0.333333	0.0909091	10.875	0.272727	0	7	0	0	T	TGME49_211030	877	18	42	6	19	0.0526316	0.186047	0.142857	0.05	3.53488	0.35	0.00105388
TGME49_211680:1024	0	10	0	1	T	TGME49_211680	1024	84	34	14	32	0.0117647	0.314286	0.0666667	0.0606061	26.7143	0.909091	0	17	11	0	T	TGME49_211680	1024	65	69	86	45	0.0151515	0.257143	0.137931	0.0217391	16.9714	0.157609	1.94e-09
TGME49_211680:2096	0	7	2	1	T	TGME49_211680	2096	27	43	13	45	0.0357143	0.181818	0.214286	0.0434783	5.09091	0.202899	0	12	0	0	T	TGME49_211680	2096	64	97	19	59	0.0153846	0.132653	0.05	0.0166667	8.62245	0.333333	4.48e-06
TGME49_211680:485	0	5	0	1	T	TGME49_211680	485	30	16	13	32	0.0322581	0.352941	0.0714286	0.0606061	10.9412	0.848485	0	6	0	19	T	TGME49_211680	485	74	40	88	177	0.0133333	0.170732	0.011236	0.11236	12.8049	10	5.7e-05
TGME49_212270:2489	0	9	2	4	T	TGME49_212270	2489	115	53	47	86	0.00862069	0.185185	0.0625	0.0574713	21.4815	0.91954	6	32	0	0	T	TGME49_212270	2489	271	154	151	90	0.0257353	0.212903	0.00657895	0.010989	8.27281	1.67033	2.13e-12
TGME49_212270:937	0	11	7	1	T	TGME49_212270	937	19	36	24	44	0.05	0.324324	0.32	0.0444444	6.48649	0.138889	1	12	4	0	T	TGME49_212270	937	80	58	5	31	0.0246914	0.220339	0.833333	0.03125	8.92373	0.0375	1.83e-08
TGME49_212300:747	0	9	0	0	T	TGME49_212300	747	8	21	1	13	0.111111	0.454545	0.5	0.0714286	4.09091	0.142857	0	13	0	0	T	TGME49_212300	747	70	90	60	40	0.0140845	0.153846	0.0163934	0.0243902	10.9231	1.4878	8.23e-06
TGME49_213280:655	0	8	0	4	T	TGME49_213280	655	18	47	40	49	0.0526316	0.1875	0.0243902	0.1	3.5625	4.1	0	48	0	25	T	TGME49_213280	655	188	247	46	229	0.005291	0.197581	0.0212766	0.113043	37.3427	5.31304	6.6e-05
TGME49_213280:970	5	25	11	7	T	TGME49_213280	970	123	129	52	84	0.0483871	0.2	0.226415	0.0941176	4.13333	0.415686	0	73	7	1	T	TGME49_213280	970	280	304	244	136	0.00355872	0.242623	0.0326531	0.0145985	68.177	0.44708	2.23e-15
TGME49_213660:1559	0	5	0	0	T	TGME49_213660	1559	13	16	6	10	0.0714286	0.352941	0.142857	0.0909091	4.94118	0.636364	0	8	0	0	T	TGME49_213660	1559	12	30	3	30	0.0769231	0.290323	0.25	0.0322581	3.77419	0.129032	1.7e-06
TGME49_213730:2431	0	6	0	0	T	TGME49_213730	2431	20	32	3	19	0.047619	0.212121	0.25	0.05	4.45455	0.2	0	6	0	0	T	TGME49_213730	2431	82	37	65	25	0.0120482	0.184211	0.0151515	0.0384615	15.2895	2.53846	0.000223426
TGME49_213940:605	0	20	1	7	T	TGME49_213940	605	70	139	44	103	0.0140845	0.15	0.0444444	0.0769231	10.65	1.73077	0	38	0	0	T	TGME49_213940	605	450	320	140	216	0.0022173	0.121495	0.0070922	0.0046083	54.7944	0.64977	1.88e-11
TGME49_214320:1307	0	6	0	3	T	TGME49_214320	1307	31	20	6	34	0.03125	0.333333	0.142857	0.114286	10.6667	0.8	0	5	9	0	T	TGME49_214320	1307	33	28	39	50	0.0294118	0.206897	0.25	0.0196078	7.03448	0.0784314	9.07e-07
TGME49_214410:4195	0	10	5	0	T	TGME49_214410	4195	143	85	37	46	0.00694444	0.127907	0.157895	0.0212766	18.4186	0.134752	0	5	0	0	T	TGME49_214410	4195	28	26	55	13	0.0344828	0.222222	0.0178571	0.0714286	6.44444	4	0.000190523
TGME49_214790:1512	0	5	0	1	T	TGME49_214790	1512	9	15	24	39	0.1	0.375	0.04	0.05	3.75	1.25	0	13	1	0	T	TGME49_214790	1512	91	48	41	29	0.0108696	0.285714	0.047619	0.0333333	26.2857	0.7	3.26e-09
TGME49_214840:10276	0	6	0	0	T	TGME49_214840	10276	24	43	10	25	0.04	0.159091	0.0909091	0.0384615	3.97727	0.423077	4	11	0	0	T	TGME49_214840	10276	134	82	14	36	0.037037	0.144578	0.0666667	0.027027	3.90361	0.405405	0.000134072
TGME49_214940:1979	0	18	0	5	T	TGME49_214940	1979	70	140	51	115	0.0140845	0.134752	0.0192308	0.0517241	9.56738	2.68966	0	13	0	0	T	TGME49_214940	1979	167	93	70	96	0.00595238	0.148936	0.0140845	0.0103093	25.0213	0.731959	2.76e-08
TGME49_215220:2707	0	11	0	4	T	TGME49_215220	2707	44	63	4	53	0.0222222	0.1875	0.2	0.0925926	8.4375	0.462963	0	6	34	0	T	TGME49_215220	2707	70	44	103	143	0.0140845	0.155556	0.336538	0.00694444	11.0444	0.0206349	1.59e-10
TGME49_215460:1072	0	15	0	6	T	TGME49_215460	1072	71	76	44	72	0.0138889	0.207792	0.0222222	0.0958904	14.961	4.31507	0	14	0	0	T	TGME49_215460	1072	100	104	38	40	0.00990099	0.142857	0.025641	0.0243902	14.4286	0.95122	0.000471496
TGME49_216720:2267	0	5	0	1	T	TGME49_216720	2267	18	27	23	19	0.0526316	0.214286	0.0416667	0.1	4.07143	2.4	1	10	0	0	T	TGME49_216720	2267	68	68	25	53	0.0289855	0.15942	0.0384615	0.0185185	5.5	0.481481	6.13e-05
TGME49_216860:1912	0	11	0	1	T	TGME49_216860	1912	109	65	48	48	0.00909091	0.181818	0.0204082	0.0408163	20	2	0	12	0	0	T	TGME49_216860	1912	88	88	51	112	0.011236	0.146067	0.0192308	0.00884956	13	0.460177	1.4e-10
TGME49_216970:1405	0	5	0	0	T	TGME49_216970	1405	16	17	4	18	0.0588235	0.333333	0.2	0.0526316	5.66667	0.263158	0	5	0	0	T	TGME49_216970	1405	59	36	26	68	0.0166667	0.162162	0.037037	0.0144928	9.72973	0.391304	1.55e-08
TGME49_217160:58	0	6	0	0	T	TGME49_217160	58	27	19	3	33	0.0357143	0.35	0.25	0.0294118	9.8	0.117647	0	10	0	0	T	TGME49_217160	58	8	27	18	12	0.111111	0.392857	0.0526316	0.0769231	3.53571	1.46154	4.43e-09
TGME49_217510:126	0	9	0	5	T	TGME49_217510	126	15	37	16	54	0.0625	0.263158	0.0588235	0.109091	4.21053	1.85455	0	14	0	0	T	TGME49_217510	126	15	56	5	13	0.0625	0.263158	0.166667	0.0714286	4.21053	0.428571	0.000259034
TGME49_217520:2249	0	6	0	0	T	TGME49_217520	2249	24	21	17	11	0.04	0.318182	0.0555556	0.0833333	7.95455	1.5	0	11	0	0	T	TGME49_217520	2249	14	13	33	28	0.0666667	0.857143	0.0294118	0.0344828	12.8571	1.17241	1.82e-12
TGME49_217540:1669	0	11	0	1	T	TGME49_217540	1669	16	26	3	26	0.0588235	0.444444	0.25	0.0740741	7.55556	0.296296	0	15	19	0	T	TGME49_217540	1669	146	90	119	33	0.00680272	0.175824	0.166667	0.0294118	25.8462	0.176471	5.67e-06
TGME49_217540:701	0	6	0	0	T	TGME49_217540	701	21	30	2	42	0.0454546	0.225806	0.333333	0.0232558	4.96774	0.0697674	0	5	0	0	T	TGME49_217540	701	46	24	6	11	0.0212766	0.24	0.142857	0.0833333	11.28	0.583333	5.71e-06
TGME49_217680:6345	0	5	0	0	T	TGME49_217680	6345	56	17	11	9	0.0175439	0.333333	0.0833333	0.1	19	1.2	0	14	0	0	T	TGME49_217680	6345	12	40	17	76	0.0769231	0.365854	0.0555556	0.012987	4.7561	0.233766	1.08e-15
TGME49_217890:2013	0	17	0	3	T	TGME49_217890	2013	49	77	33	47	0.02	0.230769	0.0294118	0.0833333	11.5385	2.83333	1	40	1	7	T	TGME49_217890	2013	94	126	120	124	0.0210526	0.322835	0.0165289	0.064	15.3346	3.872	1.46e-13
TGME49_218260:1270	0	12	0	2	T	TGME49_218260	1270	34	98	39	71	0.0285714	0.131313	0.025	0.0416667	4.59596	1.66667	0	23	0	0	T	TGME49_218260	1270	228	174	56	42	0.00436681	0.137143	0.0175439	0.0232558	31.4057	1.32558	2.71e-05
TGME49_218260:683	0	17	2	4	T	TGME49_218260	683	59	81	32	96	0.0166667	0.219512	0.0909091	0.0515464	13.1707	0.56701	9	34	6	0	T	TGME49_218260	683	252	189	117	96	0.0395257	0.184211	0.059322	0.0103093	4.66053	0.173785	6.19e-13
TGME49_218260:925	0	15	0	2	T	TGME49_218260	925	58	47	31	98	0.0169491	0.333333	0.03125	0.030303	19.6667	0.969697	0	40	0	0	T	TGME49_218260	925	120	89	2	40	0.00826446	0.455556	0.333333	0.0243902	55.1222	0.0731707	3.9e-28
TGME49_218520:4898	0	18	0	8	T	TGME49_218520	4898	47	108	59	187	0.0208333	0.174312	0.0166667	0.0478723	8.36697	2.87234	10	34	2	0	T	TGME49_218520	4898	170	131	159	11	0.0643275	0.265152	0.01875	0.0833333	4.1219	4.44444	1.7e-12
TGME49_218820:514	0	5	0	0	T	TGME49_218820	514	34	31	10	58	0.0285714	0.1875	0.0909091	0.0169491	6.5625	0.186441	0	12	26	0	T	TGME49_218820	514	80	106	151	42	0.0123457	0.121495	0.177632	0.0232558	9.84112	0.130922	1.76e-06
TGME49_219140:535	0	6	3	1	T	TGME49_219140	535	15	27	5	27	0.0625	0.25	0.666667	0.0714286	4	0.107143	0	10	0	0	T	TGME49_219140	535	56	49	27	50	0.0175439	0.22	0.0357143	0.0196078	12.54	0.54902	2.68e-07
TGME49_219690:873	0	6	0	2	T	TGME49_219690	873	22	42	17	34	0.0434783	0.162791	0.0555556	0.0857143	3.74419	1.54286	0	7	0	0	T	TGME49_219690	873	11	23	7	68	0.0833333	0.333333	0.125	0.0144928	4	0.115942	4.54e-08
TGME49_219750:435	0	8	0	0	T	TGME49_219750	435	41	36	4	10	0.0238095	0.243243	0.2	0.0909091	10.2162	0.454545	0	34	0	1	T	TGME49_219750	435	128	155	99	71	0.00775194	0.224359	0.01	0.0277778	28.9423	2.77778	4.38e-08
TGME49_219820:1720	0	8	0	1	T	TGME49_219820	1720	15	35	14	33	0.0625	0.25	0.0666667	0.0588235	4	0.882353	3	11	0	3	T	TGME49_219820	1720	71	58	32	73	0.0555556	0.20339	0.030303	0.0540541	3.66102	1.78378	7.61e-07
TGME49_221380:2155	0	8	0	0	T	TGME49_221380	2155	29	19	8	25	0.0333333	0.45	0.111111	0.0384615	13.5	0.346154	0	12	0	0	T	TGME49_221380	2155	119	40	56	30	0.00833333	0.317073	0.0175439	0.0322581	38.0488	1.83871	1.29e-10
TGME49_221470:2211	0	6	0	0	T	TGME49_221470	2211	36	46	7	48	0.027027	0.148936	0.125	0.0204082	5.51064	0.163265	0	5	0	0	T	TGME49_221470	2211	13	11	27	11	0.0714286	0.5	0.0357143	0.0833333	7	2.33333	3.21e-06
TGME49_221480:5329	0	5	1	0	T	TGME49_221480	5329	17	24	15	29	0.0555556	0.24	0.125	0.0333333	4.32	0.266667	0	5	0	0	T	TGME49_221480	5329	29	20	8	70	0.0333333	0.285714	0.111111	0.0140845	8.57143	0.126761	8.21e-12
TGME49_221590:3055	0	6	5	1	T	TGME49_221590	3055	15	30	20	16	0.0625	0.225806	0.285714	0.117647	3.6129	0.411765	0	11	0	0	T	TGME49_221590	3055	27	33	30	27	0.0357143	0.352941	0.0322581	0.0357143	9.88235	1.10714	2.26e-05
TGME49_221905:670	0	8	0	0	T	TGME49_221905	670	24	40	9	24	0.04	0.219512	0.1	0.04	5.4878	0.4	0	15	0	0	T	TGME49_221905	670	44	40	7	16	0.0222222	0.390244	0.125	0.0588235	17.561	0.470588	1.29e-06
TGME49_221910:1108	0	5	0	0	T	TGME49_221910	1108	29	47	28	19	0.0333333	0.125	0.0344828	0.05	3.75	1.45	1	17	0	0	T	TGME49_221910	1108	130	113	12	136	0.0152672	0.157895	0.0769231	0.00729927	10.3421	0.0948905	1.1e-10
TGME49_222220:1663	0	9	0	2	T	TGME49_222220	1663	33	43	2	41	0.0294118	0.227273	0.333333	0.0714286	7.72727	0.214286	0	31	13	1	T	TGME49_222220	1663	288	207	64	80	0.00346021	0.153846	0.215385	0.0246914	44.4615	0.114638	1.57e-06
TGME49_222220:1664	0	5	0	0	T	TGME49_222220	1664	33	48	2	40	0.0294118	0.122449	0.333333	0.0243902	4.16326	0.0731707	10	41	3	0	T	TGME49_222220	1664	297	245	67	80	0.0369128	0.170732	0.0588235	0.0123457	4.62528	0.209877	1.26e-09
TGME49_222840:1347	0	5	0	1	T	TGME49_222840	1347	46	35	33	49	0.0212766	0.166667	0.0294118	0.04	7.83333	1.36	0	13	0	0	T	TGME49_222840	1347	228	79	27	55	0.00436681	0.175	0.0357143	0.0178571	40.075	0.5	3.55e-07
TGME49_223050:1213	0	13	0	2	T	TGME49_223050	1213	175	94	39	83	0.00568182	0.147368	0.025	0.0357143	25.9368	1.42857	14	66	0	0	T	TGME49_223050	1213	177	180	56	85	0.0842697	0.370166	0.0175439	0.0116279	4.39263	0.662791	3.62e-22
TGME49_223050:1269	0	10	6	2	T	TGME49_223050	1269	45	49	18	59	0.0217391	0.22	0.368421	0.05	10.12	0.135714	3	51	0	0	T	TGME49_223050	1269	449	222	236	138	0.00888889	0.233184	0.00421941	0.00719425	26.2332	1.70504	2.57e-19
TGME49_223940:2264	0	5	0	6	T	TGME49_223940	2264	42	23	14	58	0.0232558	0.25	0.0666667	0.118644	10.75	1.77966	1	20	12	0	T	TGME49_223940	2264	161	76	57	48	0.0123457	0.272727	0.224138	0.0204082	22.0909	0.0910518	1.22e-07
TGME49_224460:1532	0	11	7	4	T	TGME49_224460	1532	136	81	58	83	0.00729927	0.146342	0.135593	0.0595238	20.0488	0.438988	0	6	0	0	T	TGME49_224460	1532	84	47	43	102	0.0117647	0.145833	0.0227273	0.00970874	12.3958	0.427184	1.07e-07
TGME49_224460:3171	0	8	2	0	T	TGME49_224460	3171	96	62	41	75	0.0103093	0.142857	0.0714286	0.0131579	13.8571	0.18421	12	44	23	14	T	TGME49_224460	3171	334	240	78	174	0.038806	0.186722	0.303797	0.0857143	4.81168	0.282143	4.02e-08
TGME49_224460:530	0	11	1	6	T	TGME49_224460	530	46	57	37	61	0.0212766	0.206897	0.0526316	0.112903	9.72414	2.14516	0	7	0	0	T	TGME49_224460	530	40	26	51	17	0.0243902	0.296296	0.0192308	0.0555556	12.1481	2.88889	0.00084052
TGME49_225120:1309	0	5	0	1	T	TGME49_225120	1309	21	33	13	25	0.0454546	0.176471	0.0714286	0.0769231	3.88235	1.07692	0	10	0	0	T	TGME49_225120	1309	43	26	73	58	0.0227273	0.407407	0.0135135	0.0169492	17.9259	1.25424	7.81e-10
TGME49_225555:385	0	5	0	0	T	TGME49_225555	385	53	21	6	17	0.0185185	0.272727	0.142857	0.0555556	14.7273	0.388889	0	5	0	0	T	TGME49_225555	385	46	43	14	22	0.0212766	0.136364	0.0666667	0.0434783	6.40909	0.652174	0.00132537
TGME49_226020:1193	0	7	0	1	T	TGME49_226020	1193	36	38	17	39	0.027027	0.205128	0.0555556	0.05	7.58974	0.9	0	8	0	0	T	TGME49_226020	1193	74	45	90	81	0.0133333	0.195652	0.010989	0.0121951	14.6739	1.10976	1.12e-09
TGME49_226410:1281	0	5	0	1	T	TGME49_226410	1281	36	25	5	19	0.027027	0.230769	0.166667	0.1	8.53846	0.6	0	8	0	0	T	TGME49_226410	1281	36	56	36	16	0.027027	0.157895	0.027027	0.0588235	5.84211	2.17647	0.0168589
TGME49_226410:1326	0	15	0	1	T	TGME49_226410	1326	22	48	15	51	0.0434783	0.326531	0.0625	0.0384615	7.5102	0.615385	1	11	0	0	T	TGME49_226410	1326	96	76	1	88	0.0206186	0.155844	0.5	0.011236	7.55844	0.0224719	2.36e-13
TGME49_226500:231	0	7	0	0	T	TGME49_226500	231	18	28	7	13	0.0526316	0.275862	0.125	0.0714286	5.24138	0.571429	4	22	0	0	T	TGME49_226500	231	93	78	28	105	0.0531915	0.291139	0.0344828	0.00943396	5.47342	0.273585	4.17e-17
TGME49_227280:2976	0	35	8	19	T	TGME49_227280	2976	165	245	112	263	0.0060241	0.146342	0.079646	0.0757576	24.2927	0.951179	26	111	1	58	T	TGME49_227280	2976	762	797	231	650	0.0353866	0.140351	0.00862069	0.0906298	3.96621	10.5131	1.53e-07
TGME49_227380:2526	0	7	0	1	T	TGME49_227380	2526	20	42	4	28	0.0476191	0.186047	0.2	0.0689655	3.90698	0.344828	0	18	29	0	T	TGME49_227380	2526	45	92	109	40	0.0217391	0.204301	0.272727	0.0243902	9.39785	0.0894309	1.32e-05
TGME49_227380:378	0	5	0	1	T	TGME49_227380	378	66	30	8	25	0.0149254	0.193548	0.111111	0.0769231	12.9677	0.692308	0	8	0	0	T	TGME49_227380	378	92	51	32	46	0.0107527	0.173077	0.030303	0.0212766	16.0962	0.702128	5.88e-05
TGME49_227810:2910	0	5	4	0	T	TGME49_227810	2910	17	22	4	15	0.0555556	0.26087	1	0.0625	4.69565	0.0625	1	12	0	0	T	TGME49_227810	2910	60	40	34	26	0.0327869	0.317073	0.0285714	0.037037	9.67073	1.2963	1.97e-06
TGME49_228170:1107	0	5	3	0	T	TGME49_228170	1107	32	16	6	8	0.030303	0.352941	0.571429	0.111111	11.6471	0.194444	0	8	0	0	T	TGME49_228170	1107	55	56	52	33	0.0178571	0.157895	0.0188679	0.0294118	8.84211	1.55882	0.000284643
TGME49_228170:2393	0	8	0	0	T	TGME49_228170	2393	78	27	10	13	0.0126582	0.321429	0.0909091	0.0714286	25.3929	0.785714	0	6	0	0	T	TGME49_228170	2393	93	52	62	113	0.0106383	0.132075	0.015873	0.00877193	12.4151	0.552632	2.12e-11
TGME49_228760:1621	0	6	0	0	T	TGME49_228760	1621	64	22	5	44	0.0153846	0.304348	0.166667	0.0222222	19.7826	0.133333	0	10	0	0	T	TGME49_228760	1621	41	20	19	42	0.0238095	0.52381	0.05	0.0232558	22	0.465116	1.23e-18
TGME49_228760:2270	0	5	0	0	T	TGME49_228760	2270	15	15	20	22	0.0625	0.375	0.0476191	0.0434783	6	0.913044	0	10	0	0	T	TGME49_228760	2270	30	65	3	36	0.0322581	0.166667	0.25	0.027027	5.16667	0.108108	5.89e-06
TGME49_229000:2373	0	8	1	0	T	TGME49_229000	2373	15	25	1	10	0.0625	0.346154	1	0.0909091	5.53846	0.0909091	0	13	0	0	T	TGME49_229000	2373	22	55	23	11	0.0434783	0.25	0.0416667	0.0833333	5.75	2	0.0016711
TGME49_229010:4126	0	5	0	0	T	TGME49_229010	4126	14	16	6	11	0.0666667	0.352941	0.142857	0.0833333	5.29412	0.583333	0	9	0	0	T	TGME49_229010	4126	56	27	43	74	0.0175439	0.357143	0.0227273	0.0133333	20.3571	0.586667	2.88e-15
TGME49_229010:4129	0	6	0	0	T	TGME49_229010	4129	14	21	6	11	0.0666667	0.318182	0.142857	0.0833333	4.77273	0.583333	0	7	0	2	T	TGME49_229010	4129	56	37	43	83	0.0175439	0.210526	0.0227273	0.0357143	12	1.57143	1.71e-08
TGME49_229930:755	0	7	0	0	T	TGME49_229930	755	28	41	33	14	0.0344828	0.190476	0.0294118	0.0666667	5.52381	2.26667	0	14	0	0	T	TGME49_229930	755	163	123	83	46	0.00609756	0.120968	0.0119048	0.0212766	19.8387	1.78723	0.000268863
TGME49_230160:154	0	27	2	18	T	TGME49_230160	154	117	144	71	198	0.00847458	0.193103	0.0416667	0.0954774	22.7862	2.29146	1	41	0	0	T	TGME49_230160	154	330	301	58	129	0.0060423	0.139073	0.0169492	0.00769231	23.0166	0.453846	2.97e-08
TGME49_230180:1142	1	7	0	1	T	TGME49_230180	1142	68	65	14	38	0.0289855	0.121212	0.0666667	0.0512821	4.18182	0.769231	0	6	0	0	T	TGME49_230180	1142	90	21	28	35	0.010989	0.318182	0.0344828	0.0277778	28.9545	0.805556	8.92e-05
TGME49_230180:1687	0	18	13	7	T	TGME49_230180	1687	47	70	40	76	0.0208333	0.267606	0.341463	0.103896	12.8451	0.304267	0	10	0	0	T	TGME49_230180	1687	59	70	46	79	0.0166667	0.15493	0.0212766	0.0125	9.29577	0.5875	2.64e-08
TGME49_230180:249	0	12	0	0	T	TGME49_230180	249	57	89	13	51	0.0172414	0.144444	0.0714286	0.0192308	8.37778	0.269231	2	19	0	0	T	TGME49_230180	249	64	59	51	16	0.0461538	0.333333	0.0192308	0.0588235	7.22222	3.05882	1.45e-07
TGME49_230180:3322	0	7	0	1	T	TGME49_230180	3322	35	65	25	87	0.0277778	0.121212	0.0384615	0.0227273	4.36364	0.590909	0	9	0	0	T	TGME49_230180	3322	51	49	5	16	0.0192308	0.2	0.166667	0.0588235	10.4	0.352941	3.06e-06
TGME49_230180:348	0	16	0	0	T	TGME49_230180	348	172	104	13	81	0.00578035	0.161905	0.0714286	0.0121951	28.0095	0.170732	4	12	0	0	T	TGME49_230180	348	69	44	13	37	0.0714286	0.288889	0.0714286	0.0263158	4.04444	0.368421	1.79e-11
TGME49_230210:788	0	9	0	0	T	TGME49_230210	788	15	21	12	26	0.0625	0.454545	0.0769231	0.037037	7.27273	0.481482	1	16	44	0	T	TGME49_230210	788	22	43	80	31	0.0869565	0.386364	0.555556	0.03125	4.44318	0.05625	5.48e-13
TGME49_230380:1263	0	5	0	4	T	TGME49_230380	1263	26	37	13	47	0.037037	0.157895	0.0714286	0.104167	4.26316	1.45833	1	20	0	0	T	TGME49_230380	1263	131	109	132	82	0.0151515	0.190909	0.0075188	0.0120482	12.6	1.60241	7.07e-07
TGME49_230380:302	0	13	0	2	T	TGME49_230380	302	33	39	17	32	0.0294118	0.35	0.0555556	0.0909091	11.9	1.63636	1	29	12	6	T	TGME49_230380	302	169	186	85	141	0.0117647	0.160428	0.151163	0.0492958	13.6364	0.326111	4.89e-08
TGME49_230380:552	0	7	0	0	T	TGME49_230380	552	59	26	6	20	0.0166667	0.296296	0.142857	0.0476191	17.7778	0.333333	0	18	0	0	T	TGME49_230380	552	79	50	21	17	0.0125	0.372549	0.0454545	0.0555556	29.8039	1.22222	3.89e-07
TGME49_230380:883	0	6	3	1	T	TGME49_230380	883	35	35	17	16	0.0277778	0.194444	0.222222	0.117647	7	0.529412	0	6	0	0	T	TGME49_230380	883	88	55	55	62	0.011236	0.125	0.0178571	0.015873	11.125	0.888889	0.000184674
TGME49_231080:493	15	83	1	25	T	TGME49_231080	493	310	328	92	301	0.0514469	0.255319	0.0215054	0.0860927	4.96277	4.00331	38	134	0	2	T	TGME49_231080	493	539	411	27	50	0.0722222	0.32767	0.0357143	0.0588235	4.53697	1.64706	1.13e-23
TGME49_231640:3013	0	5	0	0	T	TGME49_231640	3013	13	17	17	19	0.0714286	0.333333	0.0555556	0.05	4.66667	0.9	0	5	0	0	T	TGME49_231640	3013	62	33	47	39	0.015873	0.176471	0.0208333	0.025	11.1176	1.2	2.39e-06
TGME49_232030:209	0	7	0	0	T	TGME49_232030	209	16	22	7	8	0.0588235	0.347826	0.125	0.111111	5.91304	0.888889	0	5	0	0	T	TGME49_232030	209	36	36	19	50	0.027027	0.162162	0.05	0.0196078	6	0.392157	1.45e-06
TGME49_232250:1218	0	6	1	2	T	TGME49_232250	1218	26	40	22	48	0.037037	0.170732	0.0869565	0.0612245	4.60976	0.704082	1	15	25	0	T	TGME49_232250	1218	128	85	81	95	0.0155039	0.186047	0.317073	0.0104167	12	0.0328526	1.68e-09
TGME49_232250:266	0	11	11	2	T	TGME49_232250	266	21	46	21	42	0.0454546	0.255319	0.545454	0.0697674	5.61702	0.127907	1	19	0	5	T	TGME49_232250	266	86	85	19	157	0.0229885	0.232558	0.05	0.0379747	10.1163	0.759494	1.7e-14
TGME49_232250:888	0	8	2	0	T	TGME49_232250	888	109	60	26	64	0.00909091	0.147541	0.111111	0.0153846	16.2295	0.138461	0	10	0	0	T	TGME49_232250	888	106	88	11	44	0.00934579	0.123596	0.0833333	0.0222222	13.2247	0.266667	8.27e-07
TGME49_232350:778	0	16	0	1	T	TGME49_232350	778	15	50	13	42	0.0625	0.333333	0.0714286	0.0465116	5.33333	0.651163	0	30	0	16	T	TGME49_232350	778	75	85	117	191	0.0131579	0.360465	0.00847458	0.0885417	27.3953	10.4479	2.97e-22
TGME49_232410:1073	0	20	3	9	T	TGME49_232410	1073	78	73	21	99	0.0126582	0.283784	0.181818	0.1	22.4189	0.55	1	64	0	12	T	TGME49_232410	1073	202	284	71	239	0.00985222	0.22807	0.0138889	0.0541667	23.1491	3.9	1.25e-17
TGME49_232630:322	0	9	0	1	T	TGME49_232630	322	18	32	2	29	0.0526316	0.30303	0.333333	0.0666667	5.75758	0.2	0	25	0	0	T	TGME49_232630	322	90	98	170	89	0.010989	0.262626	0.00584795	0.0111111	23.899	1.9	1.24e-14
TGME49_232660:221	0	5	0	0	T	TGME49_232660	221	21	27	18	13	0.0454546	0.214286	0.0526316	0.0714286	4.71429	1.35714	0	10	0	0	T	TGME49_232660	221	25	43	8	37	0.0384615	0.25	0.111111	0.0263158	6.5	0.236842	5.8e-06
TGME49_232670:2134	0	8	0	0	T	TGME49_232670	2134	75	31	11	23	0.0131579	0.28125	0.0833333	0.0416667	21.375	0.5	0	8	0	0	T	TGME49_232670	2134	48	65	5	85	0.0204082	0.136364	0.166667	0.0116279	6.68182	0.0697674	2.81e-09
TGME49_232940:1027	0	21	1	7	T	TGME49_232940	1027	159	143	101	177	0.00625	0.152778	0.0196078	0.0449438	24.4444	2.29214	0	32	0	11	T	TGME49_232940	1027	115	134	3	114	0.00862069	0.244444	0.25	0.104348	28.3556	0.417391	2.2e-10
TGME49_233380:4610	0	9	0	4	T	TGME49_233380	4610	73	54	36	67	0.0135135	0.181818	0.027027	0.0735294	13.4545	2.72059	0	33	0	0	T	TGME49_233380	4610	173	86	68	17	0.00574713	0.390805	0.0144928	0.0555556	68	3.83333	7.13e-09
TGME49_233380:895	0	7	6	3	T	TGME49_233380	895	32	42	16	48	0.030303	0.186047	0.411765	0.0816327	6.13954	0.198251	0	10	0	4	T	TGME49_233380	895	81	79	20	136	0.0121951	0.1375	0.047619	0.0364963	11.275	0.766423	4.08e-06
TGME49_233450:282	0	8	3	3	T	TGME49_233450	282	166	61	29	84	0.00598802	0.145161	0.133333	0.0470588	24.2419	0.352941	4	33	0	0	T	TGME49_233450	282	105	156	14	81	0.0471698	0.216561	0.0666667	0.0121951	4.59108	0.182927	9.92e-12
TGME49_233500:2394	0	6	0	0	T	TGME49_233500	2394	32	36	21	36	0.030303	0.189189	0.0454546	0.027027	6.24324	0.594595	5	27	0	4	T	TGME49_233500	2394	96	94	22	44	0.0618557	0.294737	0.0434783	0.111111	4.76491	2.55556	1.66e-06
TGME49_234180:353	0	6	2	1	T	TGME49_234180	353	23	35	12	25	0.0416667	0.194444	0.230769	0.0769231	4.66667	0.333333	0	7	10	0	T	TGME49_234180	353	36	26	10	20	0.027027	0.296296	1	0.047619	10.963	0.047619	0.000273008
TGME49_234180:517	0	10	0	0	T	TGME49_234180	517	9	25	11	28	0.1	0.423077	0.0833333	0.0344828	4.23077	0.413793	0	9	0	0	T	TGME49_234180	517	30	33	54	10	0.0322581	0.294118	0.0181818	0.0909091	9.11765	5	2.82e-07
TGME49_234450:675	1	12	0	0	T	TGME49_234450	675	33	59	14	41	0.0588235	0.216667	0.0666667	0.0238095	3.68333	0.357143	3	58	0	14	T	TGME49_234450	675	792	411	381	214	0.00504414	0.143204	0.0026178	0.0697674	28.3902	26.6512	2.01e-06
TGME49_235470:1864	0	8	0	0	T	TGME49_235470	1864	33	29	12	20	0.0294118	0.3	0.0769231	0.0476191	10.2	0.619048	0	20	0	0	T	TGME49_235470	1864	99	94	87	61	0.01	0.221053	0.0113636	0.016129	22.1053	1.41935	8.19e-10
TGME49_235470:2814	0	7	0	0	T	TGME49_235470	2814	25	26	1	13	0.0384615	0.296296	0.5	0.0714286	7.7037	0.142857	0	7	0	0	T	TGME49_235470	2814	61	56	105	57	0.016129	0.140351	0.00943396	0.0172414	8.70175	1.82759	2.04e-06
TGME49_235930:526	0	10	0	0	T	TGME49_235930	526	40	30	14	15	0.0243902	0.354839	0.0666667	0.0625	14.5484	0.9375	6	20	30	1	T	TGME49_235930	526	61	52	45	30	0.112903	0.396226	0.673913	0.0645161	3.50943	0.0957336	3.38e-08
TGME49_236010:3928	0	5	0	0	T	TGME49_236010	3928	33	38	16	22	0.0294118	0.153846	0.0588235	0.0434783	5.23077	0.73913	0	7	0	0	T	TGME49_236010	3928	46	49	56	19	0.0212766	0.16	0.0175439	0.05	7.52	2.85	0.00227626
TGME49_236040:1290	0	13	2	2	T	TGME49_236040	1290	79	56	48	48	0.0125	0.245614	0.0612245	0.0612245	19.6491	1	10	75	36	32	T	TGME49_236040	1290	342	475	295	368	0.03207	0.159664	0.125	0.0894309	4.97861	0.715447	4.22e-07
TGME49_236210:1597	0	5	0	0	T	TGME49_236210	1597	15	8	1	10	0.0625	0.666667	0.5	0.0909091	10.6667	0.181818	0	6	0	0	T	TGME49_236210	1597	54	23	3	18	0.0181818	0.291667	0.25	0.0526316	16.0417	0.210526	4.69e-06
TGME49_236580:914	0	5	0	1	T	TGME49_236580	914	39	32	11	25	0.025	0.181818	0.0833333	0.0769231	7.27273	0.923077	0	33	0	2	T	TGME49_236580	914	49	91	67	41	0.02	0.369565	0.0147059	0.0714286	18.4783	4.85714	1.16e-07
TGME49_236630:2050	0	5	0	0	T	TGME49_236630	2050	50	40	2	33	0.0196078	0.146342	0.333333	0.0294118	7.46342	0.0882353	1	5	16	0	T	TGME49_236630	2050	90	35	26	10	0.021978	0.166667	0.62963	0.0909091	7.58333	0.144385	0.00212638
TGME49_236630:674	0	9	0	0	T	TGME49_236630	674	26	34	18	10	0.037037	0.285714	0.0526316	0.0909091	7.71429	1.72727	0	10	37	5	T	TGME49_236630	674	46	43	71	60	0.0212766	0.25	0.527778	0.0983607	11.75	0.186368	0.000141973
TGME49_236650:1863	0	9	0	0	T	TGME49_236650	1863	60	64	25	30	0.0163934	0.153846	0.0384615	0.0322581	9.38462	0.83871	0	11	0	0	T	TGME49_236650	1863	33	34	18	23	0.0294118	0.342857	0.0526316	0.0416667	11.6571	0.791667	5.57e-06
TGME49_236650:3278	0	20	2	0	T	TGME49_236650	3278	12	58	6	35	0.0769231	0.355932	0.428571	0.0277778	4.62712	0.0648148	0	6	0	0	T	TGME49_236650	3278	40	34	28	48	0.0243902	0.2	0.0344828	0.0204082	8.2	0.591837	1.07e-12
TGME49_236650:4053	0	9	0	0	T	TGME49_236650	4053	34	60	15	52	0.0285714	0.163934	0.0625	0.0188679	5.73771	0.301887	1	15	0	0	T	TGME49_236650	4053	98	122	39	25	0.020202	0.130081	0.025	0.0384615	6.43902	1.53846	1.87e-05
TGME49_236870:397	0	8	3	1	T	TGME49_236870	397	49	41	23	51	0.02	0.214286	0.166667	0.0384615	10.7143	0.230769	0	47	41	0	T	TGME49_236870	397	347	177	72	69	0.00287356	0.269663	0.575342	0.0142857	93.8427	0.0248299	2.92e-14
TGME49_236890:971	0	5	0	0	T	TGME49_236890	971	38	35	11	41	0.025641	0.166667	0.0833333	0.0238095	6.5	0.285714	0	16	0	0	T	TGME49_236890	971	78	65	15	45	0.0126582	0.257576	0.0625	0.0217391	20.3485	0.347826	1.57e-09
TGME49_237130:1471	0	9	0	0	T	TGME49_237130	1471	55	30	14	19	0.0178571	0.322581	0.0666667	0.05	18.0645	0.75	0	7	0	0	T	TGME49_237130	1471	33	20	4	9	0.0294118	0.380952	0.2	0.1	12.9524	0.5	2.04e-05
TGME49_237150:1835	0	9	5	0	T	TGME49_237150	1835	14	16	15	25	0.0666667	0.588235	0.375	0.0384615	8.82353	0.102564	0	7	36	0	T	TGME49_237150	1835	48	43	60	49	0.0204082	0.181818	0.606557	0.02	8.90909	0.032973	6.82e-11
TGME49_237230:2050	0	19	0	3	T	TGME49_237230	2050	135	84	38	77	0.00735294	0.235294	0.025641	0.0512821	32	2	0	16	0	0	T	TGME49_237230	2050	91	134	30	102	0.0108696	0.125926	0.0322581	0.00970874	11.5852	0.300971	1.79e-10
TGME49_237230:2067	0	9	0	0	T	TGME49_237230	2067	27	69	19	67	0.0357143	0.142857	0.05	0.0147059	4	0.294118	0	10	0	0	T	TGME49_237230	2067	37	68	1	87	0.0263158	0.15942	0.5	0.0113636	6.05797	0.0227273	1.03e-10
TGME49_237230:2190	0	20	1	3	T	TGME49_237230	2190	91	101	49	81	0.0108696	0.205882	0.04	0.0487805	18.9412	1.21951	0	31	8	0	T	TGME49_237230	2190	331	259	226	97	0.00301205	0.123077	0.0396476	0.0102041	40.8615	0.25737	7.16e-09
TGME49_237560:1815	0	7	0	0	T	TGME49_237560	1815	22	51	15	24	0.0434783	0.153846	0.0625	0.04	3.53846	0.64	0	11	0	0	T	TGME49_237560	1815	109	70	16	108	0.00909091	0.169014	0.0588235	0.00917431	18.5915	0.155963	5.85e-10
TGME49_237560:2057	0	8	0	1	T	TGME49_237560	2057	32	27	5	26	0.030303	0.321429	0.166667	0.0740741	10.6071	0.444444	0	12	0	0	T	TGME49_237560	2057	80	56	77	9	0.0123457	0.22807	0.0128205	0.1	18.4737	7.8	0.000780495
TGME49_237880:1764	0	5	0	0	T	TGME49_237880	1764	31	13	2	9	0.03125	0.428571	0.333333	0.1	13.7143	0.3	0	13	0	0	T	TGME49_237880	1764	75	107	82	51	0.0131579	0.12963	0.0120482	0.0192308	9.85185	1.59615	5.82e-05
TGME49_239100:1099	0	19	0	1	T	TGME49_239100	1099	68	96	9	47	0.0144928	0.206186	0.1	0.0416667	14.2268	0.416667	11	39	0	0	T	TGME49_239100	1099	401	324	133	55	0.0298507	0.123077	0.00746269	0.0178571	4.12308	2.39286	4.53e-06
TGME49_239890:1154	0	6	0	0	T	TGME49_239890	1154	78	54	44	38	0.0126582	0.127273	0.0222222	0.025641	10.0546	1.15385	0	11	0	0	T	TGME49_239890	1154	92	79	13	54	0.0107527	0.15	0.0714286	0.0181818	13.95	0.254545	3.43e-06
TGME49_240060:3005	0	8	1	5	T	TGME49_240060	3005	30	59	52	65	0.0322581	0.15	0.0377359	0.0909091	4.65	2.40909	0	9	0	0	T	TGME49_240060	3005	34	78	51	62	0.0285714	0.126582	0.0192308	0.015873	4.43038	0.825397	0.000975212
TGME49_240060:64	0	5	1	0	T	TGME49_240060	64	10	17	1	17	0.0909091	0.333333	1	0.0555556	3.66667	0.0555556	0	12	0	0	T	TGME49_240060	64	32	56	51	54	0.030303	0.22807	0.0192308	0.0181818	7.52632	0.945455	6.69e-09
TGME49_241240:2239	0	10	1	4	T	TGME49_241240	2239	37	57	36	52	0.0263158	0.189655	0.054054	0.0943396	7.2069	1.74528	0	17	0	0	T	TGME49_241240	2239	74	83	99	61	0.0133333	0.214286	0.01	0.016129	16.0714	1.6129	7.51e-07
TGME49_241240:2439	0	5	0	0	T	TGME49_241240	2439	38	37	14	44	0.025641	0.157895	0.0666667	0.0222222	6.15789	0.333333	5	26	3	9	T	TGME49_241240	2439	377	175	150	240	0.015873	0.153409	0.0264901	0.0414938	9.66477	1.56639	1.44e-10
TGME49_241820:3390	0	6	0	1	T	TGME49_241820	3390	37	39	28	60	0.0263158	0.175	0.0344828	0.0327869	6.65	0.95082	1	6	0	0	T	TGME49_241820	3390	106	15	89	24	0.0186916	0.4375	0.0111111	0.04	23.4062	3.6	1.7e-08
TGME49_242070:5962	0	6	0	0	T	TGME49_242070	5962	54	32	17	22	0.0181818	0.212121	0.0555556	0.0434783	11.6667	0.782609	0	9	0	0	T	TGME49_242070	5962	25	39	38	35	0.0384615	0.25	0.025641	0.0277778	6.5	1.08333	1.33e-06
TGME49_242070:6758	0	7	0	1	T	TGME49_242070	6758	48	31	16	19	0.0204082	0.25	0.0588235	0.1	12.25	1.7	0	11	0	0	T	TGME49_242070	6758	127	54	49	14	0.0078125	0.218182	0.02	0.0666667	27.9273	3.33333	0.00383505
TGME49_242090:2043	0	5	0	0	T	TGME49_242090	2043	61	33	12	36	0.016129	0.176471	0.0769231	0.027027	10.9412	0.351351	0	6	0	0	T	TGME49_242090	2043	11	18	12	34	0.0833333	0.368421	0.0769231	0.0285714	4.42105	0.371429	4.11e-08
TGME49_242340:699	0	8	1	3	T	TGME49_242340	699	106	56	20	95	0.00934579	0.157895	0.0952381	0.0416667	16.8947	0.4375	12	23	0	15	T	TGME49_242340	699	280	139	82	173	0.0462633	0.171429	0.0120482	0.091954	3.70549	7.63218	4.69e-06
TGME49_243570:1005	0	7	5	2	T	TGME49_243570	1005	81	54	24	35	0.0121951	0.145454	0.24	0.0833333	11.9273	0.347222	6	50	0	0	T	TGME49_243570	1005	329	407	71	162	0.0212121	0.125	0.0138889	0.00613497	5.89286	0.441718	2.11e-09
TGME49_243690:1808	0	8	0	0	T	TGME49_243690	1808	28	25	10	22	0.0344828	0.346154	0.0909091	0.0434783	10.0385	0.478261	0	6	0	0	T	TGME49_243690	1808	82	55	37	87	0.0120482	0.125	0.0263158	0.0113636	10.375	0.431818	7.82e-10
TGME49_243730:1624	0	10	0	0	T	TGME49_243730	1624	37	46	13	25	0.0263158	0.234043	0.0714286	0.0384615	8.89362	0.538462	3	30	0	0	T	TGME49_243730	1624	89	99	39	99	0.0444444	0.31	0.025	0.01	6.975	0.4	4.15e-18
TGME49_244560:2101	0	8	0	2	T	TGME49_244560	2101	34	28	16	45	0.0285714	0.310345	0.0588235	0.0652174	10.8621	1.1087	0	13	0	0	T	TGME49_244560	2101	31	78	30	111	0.03125	0.177215	0.0322581	0.00892857	5.67089	0.276786	8.56e-13
TGME49_244560:2746	0	6	0	2	T	TGME49_244560	2746	27	41	22	49	0.0357143	0.166667	0.0434783	0.06	4.66667	1.38	0	33	0	0	T	TGME49_244560	2746	93	191	119	125	0.0106383	0.177083	0.00833333	0.00793651	16.6458	0.952381	8.04e-12
TGME49_245490:114	0	5	0	0	T	TGME49_245490	114	63	33	22	25	0.015625	0.176471	0.0434783	0.0384615	11.2941	0.884615	0	9	0	0	T	TGME49_245490	114	58	54	11	40	0.0169492	0.181818	0.0833333	0.0243902	10.7273	0.292683	1.11e-05
TGME49_245490:3209	0	8	0	0	T	TGME49_245490	3209	101	48	13	33	0.00980392	0.183673	0.0714286	0.0294118	18.7347	0.411765	0	6	0	0	T	TGME49_245490	3209	37	33	32	34	0.0263158	0.205882	0.030303	0.0285714	7.82353	0.942857	3.01e-06
TGME49_245490:87	0	8	0	0	T	TGME49_245490	87	81	59	34	58	0.0121951	0.15	0.0285714	0.0169491	12.3	0.59322	0	6	0	0	T	TGME49_245490	87	41	46	48	20	0.0238095	0.148936	0.0204082	0.047619	6.25532	2.33333	1.42e-05
TGME49_246550:2304	0	10	1	5	T	TGME49_246550	2304	94	68	42	72	0.0105263	0.15942	0.0465116	0.0821918	15.1449	1.76712	1	19	32	0	T	TGME49_246550	2304	83	93	94	79	0.0238095	0.212766	0.347368	0.0125	8.93617	0.0359848	3.48e-08
TGME49_246940:2443	0	8	2	0	T	TGME49_246940	2443	42	38	8	23	0.0232558	0.230769	0.333333	0.0416667	9.92308	0.125	0	17	0	0	T	TGME49_246940	2443	98	85	36	55	0.010101	0.209302	0.027027	0.0178571	20.7209	0.660714	2.01e-08
TGME49_247030:2643	0	6	0	0	T	TGME49_247030	2643	32	56	9	24	0.030303	0.122807	0.1	0.04	4.05263	0.4	0	6	39	0	T	TGME49_247030	2643	61	21	40	19	0.016129	0.318182	0.97561	0.05	19.7273	0.05125	0.000685762
TGME49_247220:1772	0	6	0	2	T	TGME49_247220	1772	33	43	11	35	0.0294118	0.159091	0.0833333	0.0833333	5.40909	1	0	13	0	0	T	TGME49_247220	1772	70	108	1	55	0.0140845	0.12844	0.5	0.0178571	9.11927	0.0357143	0.000537276
TGME49_247350:1598	0	6	0	1	T	TGME49_247350	1598	48	30	10	37	0.0204082	0.225806	0.0909091	0.0526316	11.0645	0.578947	0	11	0	0	T	TGME49_247350	1598	100	53	74	30	0.00990099	0.222222	0.0133333	0.0322581	22.4444	2.41935	3.91e-06
TGME49_247400:1074	0	6	0	0	T	TGME49_247400	1074	8	17	11	11	0.111111	0.388889	0.0833333	0.0833333	3.5	1	0	12	0	0	T	TGME49_247400	1074	70	40	7	15	0.0140845	0.317073	0.125	0.0625	22.5122	0.5	5.19e-05
TGME49_247440:3270	0	8	0	0	T	TGME49_247440	3270	34	34	3	14	0.0285714	0.257143	0.25	0.0666667	9	0.266667	0	12	0	0	T	TGME49_247440	3270	71	31	13	26	0.0138889	0.40625	0.0714286	0.037037	29.25	0.518519	4.09e-07
TGME49_247510:993	0	6	0	0	T	TGME49_247510	993	39	28	5	12	0.025	0.241379	0.166667	0.0769231	9.65517	0.461539	0	16	0	0	T	TGME49_247510	993	50	51	1	44	0.0196078	0.326923	0.5	0.0222222	16.6731	0.0444444	1.15e-08
TGME49_247520:796	0	24	0	3	T	TGME49_247520	796	52	114	47	47	0.0188679	0.217391	0.0208333	0.0833333	11.5217	4	0	37	0	0	T	TGME49_247520	796	412	298	102	280	0.00242131	0.12709	0.00970874	0.00355872	52.4883	0.366548	5.61e-19
TGME49_247530:709	0	5	0	0	T	TGME49_247530	709	21	10	9	11	0.0454546	0.545454	0.1	0.0833333	12	0.833333	0	9	0	0	T	TGME49_247530	709	116	50	12	37	0.00854701	0.196078	0.0769231	0.0263158	22.9412	0.342105	2.89e-06
TGME49_248340:345	0	9	0	1	T	TGME49_248340	345	17	28	23	36	0.0555556	0.344828	0.0416667	0.054054	6.2069	1.2973	0	8	29	0	T	TGME49_248340	345	34	37	29	19	0.0285714	0.236842	1	0.05	8.28947	0.05	1.17e-06
TGME49_248480:464	0	7	0	5	T	TGME49_248480	464	62	58	40	71	0.015873	0.135593	0.0243902	0.0833333	8.54237	3.41667	0	51	0	0	T	TGME49_248480	464	903	385	298	132	0.00110619	0.134715	0.00334448	0.0075188	121.782	2.24812	1.07e-07
TGME49_248700:577	0	10	0	1	T	TGME49_248700	577	61	43	10	39	0.016129	0.25	0.0909091	0.05	15.5	0.55	16	39	0	15	T	TGME49_248700	577	258	157	56	143	0.0656371	0.253165	0.0175439	0.111111	3.85704	6.33333	4.56e-08
TGME49_248700:592	0	12	0	3	T	TGME49_248700	592	32	64	28	53	0.030303	0.2	0.0344828	0.0740741	6.6	2.14815	4	39	56	7	T	TGME49_248700	592	230	231	88	185	0.021645	0.172414	0.640449	0.0430108	7.96552	0.0671571	6.38e-10
TGME49_248990:2047	0	8	0	5	T	TGME49_248990	2047	29	61	13	69	0.0333333	0.145161	0.0714286	0.0857143	4.35484	1.2	0	8	0	0	T	TGME49_248990	2047	59	56	11	49	0.0166667	0.157895	0.0833333	0.02	9.47368	0.24	0.000685248
TGME49_249030:3726	0	5	10	0	T	TGME49_249030	3726	41	34	13	11	0.0238095	0.171429	0.785714	0.0833333	7.2	0.106061	0	8	0	0	T	TGME49_249030	3726	60	34	8	23	0.0163934	0.257143	0.111111	0.0416667	15.6857	0.375	0.000736255
TGME49_249240:1131	0	8	0	6	T	TGME49_249240	1131	47	66	22	79	0.0208333	0.134328	0.0434783	0.0875	6.44776	2.0125	4	21	2	4	T	TGME49_249240	1131	117	134	38	78	0.0423729	0.162963	0.0769231	0.0632911	3.84593	0.822785	0.00122787
TGME49_249250:257	14	44	16	8	T	TGME49_249250	257	272	197	103	145	0.0549451	0.227273	0.163462	0.0616438	4.13636	0.377115	4	93	14	0	T	TGME49_249250	257	496	405	141	219	0.0100604	0.231527	0.105634	0.00454546	23.0138	0.0430303	6.57e-30
TGME49_249370:1257	0	7	0	0	T	TGME49_249370	1257	102	41	29	29	0.00970874	0.190476	0.0333333	0.0333333	19.6191	1	1	17	0	0	T	TGME49_249370	1257	168	124	11	110	0.0118343	0.144	0.0833333	0.00900901	12.168	0.108108	3.24e-10
TGME49_249990:1254	0	8	0	0	T	TGME49_249990	1254	53	53	31	52	0.0185185	0.166667	0.03125	0.0188679	9	0.603774	0	10	1	0	T	TGME49_249990	1254	65	52	35	17	0.0151515	0.207547	0.0555556	0.0555556	13.6981	1	2.32e-06
TGME49_249990:1680	0	5	2	1	T	TGME49_249990	1680	33	39	19	27	0.0294118	0.15	0.15	0.0714286	5.1	0.476191	0	25	0	0	T	TGME49_249990	1680	109	116	102	36	0.00909091	0.222222	0.00970874	0.027027	24.4444	2.78378	2.1e-05
TGME49_249990:203	0	13	5	6	T	TGME49_249990	203	83	50	18	82	0.0119048	0.27451	0.31579	0.0843374	23.0588	0.267068	0	8	0	0	T	TGME49_249990	203	63	49	65	17	0.015625	0.18	0.0151515	0.0555556	11.52	3.66667	3.1e-05
TGME49_249990:2136	0	5	0	0	T	TGME49_249990	2136	38	33	28	33	0.025641	0.176471	0.0344828	0.0294118	6.88235	0.852941	0	16	0	2	T	TGME49_249990	2136	114	130	72	85	0.00869565	0.129771	0.0136986	0.0348837	14.9237	2.54651	1.45e-05
TGME49_249990:3182	0	5	0	2	T	TGME49_249990	3182	49	49	38	37	0.02	0.12	0.025641	0.0789474	6	3.07895	0	18	0	0	T	TGME49_249990	3182	192	151	148	47	0.00518135	0.125	0.00671141	0.0208333	24.125	3.10417	0.00247246
TGME49_250115:1821	0	6	0	0	T	TGME49_250115	1821	21	27	10	29	0.0454546	0.25	0.0909091	0.0333333	5.5	0.366667	0	5	0	0	T	TGME49_250115	1821	33	33	53	12	0.0294118	0.176471	0.0185185	0.0769231	6	4.15385	0.00024765
TGME49_251180:5684	0	5	0	1	T	TGME49_251180	5684	34	34	9	33	0.0285714	0.171429	0.1	0.0588235	6	0.588235	0	21	0	0	T	TGME49_251180	5684	135	121	134	144	0.00735294	0.180328	0.00740741	0.00689655	24.5246	0.931034	2.82e-13
TGME49_251680:1561	0	7	0	1	T	TGME49_251680	1561	25	13	22	38	0.0384615	0.571429	0.0434783	0.0512821	14.8571	1.17949	1	36	0	0	T	TGME49_251680	1561	98	174	94	35	0.020202	0.211429	0.0105263	0.0277778	10.4657	2.63889	1.19e-07
TGME49_252210:6465	0	9	0	0	T	TGME49_252210	6465	52	29	6	35	0.0188679	0.333333	0.142857	0.0277778	17.6667	0.194444	0	5	0	0	T	TGME49_252210	6465	131	37	28	10	0.00757576	0.157895	0.0344828	0.0909091	20.8421	2.63636	2.19e-05
TGME49_252630:965	0	6	0	0	T	TGME49_252630	965	6	12	6	43	0.142857	0.538462	0.142857	0.0227273	3.76923	0.159091	0	11	0	0	T	TGME49_252630	965	43	25	25	23	0.0227273	0.461538	0.0384615	0.0416667	20.3077	1.08333	2.33e-18
TGME49_253430:1478	0	10	0	0	T	TGME49_253430	1478	48	86	31	62	0.0204082	0.126437	0.03125	0.015873	6.1954	0.507937	0	5	0	0	T	TGME49_253430	1478	81	44	31	52	0.0121951	0.133333	0.03125	0.0188679	10.9333	0.603774	8.51e-07
TGME49_253820:941	0	9	1	3	T	TGME49_253820	941	14	40	11	44	0.0666667	0.243902	0.166667	0.0888889	3.65854	0.533333	0	14	0	0	T	TGME49_253820	941	119	69	99	35	0.00833333	0.214286	0.01	0.0277778	25.7143	2.77778	1.3e-05
TGME49_254470:2307	0	7	0	0	T	TGME49_254470	2307	25	25	7	20	0.0384615	0.307692	0.125	0.0476191	8	0.380952	0	9	0	0	T	TGME49_254470	2307	45	65	7	24	0.0217391	0.151515	0.125	0.04	6.9697	0.32	0.000181771
TGME49_255060:1022	0	6	0	1	T	TGME49_255060	1022	25	30	24	30	0.0384615	0.225806	0.04	0.0645161	5.87097	1.6129	0	5	0	0	T	TGME49_255060	1022	46	18	13	24	0.0212766	0.315789	0.0714286	0.04	14.8421	0.56	1.34e-05
TGME49_255260:1042	0	14	0	3	T	TGME49_255260	1042	81	75	47	72	0.0121951	0.197368	0.0208333	0.0547945	16.1842	2.63014	0	33	0	11	T	TGME49_255260	1042	209	207	15	202	0.00476191	0.163462	0.0625	0.0591133	34.3269	0.945813	4.92e-09
TGME49_256050:351	0	7	0	1	T	TGME49_256050	351	10	24	11	22	0.0909091	0.32	0.0833333	0.0869565	3.52	1.04348	0	5	0	0	T	TGME49_256050	351	32	31	18	12	0.030303	0.1875	0.0526316	0.0769231	6.1875	1.46154	0.00243391
TGME49_257040:959	0	9	0	0	T	TGME49_257040	959	53	36	17	29	0.0185185	0.27027	0.0555556	0.0333333	14.5946	0.6	0	8	0	0	T	TGME49_257040	959	13	35	20	39	0.0714286	0.25	0.047619	0.025	3.5	0.525	8.26e-09
TGME49_257090:1067	0	8	0	1	T	TGME49_257090	1067	24	39	10	27	0.04	0.225	0.0909091	0.0714286	5.625	0.785714	12	62	16	0	T	TGME49_257090	1067	194	215	51	91	0.0666667	0.291667	0.326923	0.0108696	4.375	0.0332481	1.38e-15
TGME49_257090:722	0	5	0	0	T	TGME49_257090	722	42	40	21	23	0.0232558	0.146342	0.0454546	0.0416667	6.29268	0.916667	0	28	51	0	T	TGME49_257090	722	182	180	51	91	0.00546448	0.160221	1	0.0108696	29.3204	0.0108696	8.99e-09
TGME49_257380:1012	0	23	0	7	T	TGME49_257380	1012	80	66	28	67	0.0123457	0.358209	0.0344828	0.117647	29.0149	3.41176	14	37	0	0	T	TGME49_257380	1012	179	80	57	44	0.0833333	0.469136	0.0172414	0.0222222	5.62963	1.28889	9.24e-17
TGME49_257530:1206	0	8	0	0	T	TGME49_257530	1206	44	58	20	85	0.0222222	0.152542	0.0476191	0.0116279	6.86441	0.244186	0	11	0	0	T	TGME49_257530	1206	127	57	47	26	0.0078125	0.206897	0.0208333	0.037037	26.4828	1.77778	1.97e-09
TGME49_257530:123	0	8	0	0	T	TGME49_257530	123	32	63	35	21	0.030303	0.140625	0.0277778	0.0454546	4.64062	1.63636	0	5	0	0	T	TGME49_257530	123	52	48	21	33	0.0188679	0.122449	0.0454545	0.0294118	6.4898	0.647059	0.00119886
TGME49_257530:2370	0	6	0	2	T	TGME49_257530	2370	57	49	26	45	0.0172414	0.14	0.037037	0.0652174	8.12	1.76087	0	5	0	0	T	TGME49_257530	2370	27	27	65	17	0.0357143	0.214286	0.0151515	0.0555556	6	3.66667	0.0040496
TGME49_257530:2711	0	6	0	1	T	TGME49_257530	2711	39	50	41	46	0.025	0.137255	0.0238095	0.0425532	5.4902	1.78723	0	6	0	0	T	TGME49_257530	2711	73	48	37	51	0.0135135	0.142857	0.0263158	0.0192308	10.5714	0.730769	4.57e-05
TGME49_258470:1143	0	12	6	13	T	TGME49_258470	1143	83	61	98	118	0.0119048	0.209677	0.0707071	0.117647	17.6129	1.66387	41	76	18	21	T	TGME49_258470	1143	562	293	307	289	0.0746004	0.261905	0.0616883	0.0758621	3.51077	1.22976	8.45e-18
TGME49_258580:1767	0	5	0	1	T	TGME49_258580	1767	36	39	25	55	0.027027	0.15	0.0384615	0.0357143	5.55	0.928571	0	19	0	0	T	TGME49_258580	1767	134	131	148	72	0.00740741	0.151515	0.00671141	0.0136986	20.4545	2.0411	8.83e-08
TGME49_258580:1868	0	14	4	5	T	TGME49_258580	1868	15	47	18	52	0.0625	0.3125	0.263158	0.113208	5	0.430189	0	19	0	0	T	TGME49_258580	1868	61	62	11	62	0.016129	0.31746	0.0833333	0.015873	19.6825	0.190476	3.53e-12
TGME49_258580:946	0	5	0	0	T	TGME49_258580	946	24	27	3	26	0.04	0.214286	0.25	0.037037	5.35714	0.148148	0	10	0	0	T	TGME49_258580	946	32	38	20	12	0.030303	0.282051	0.047619	0.0769231	9.30769	1.61538	4.68e-05
TGME49_258660:105	0	6	0	1	T	TGME49_258660	105	17	34	3	30	0.0555556	0.2	0.25	0.0645161	3.6	0.258064	0	16	0	0	T	TGME49_258660	105	204	115	15	51	0.00487805	0.146552	0.0625	0.0192308	30.0431	0.307692	3.61e-05
TGME49_258820:302	0	6	0	1	T	TGME49_258820	302	18	16	1	20	0.0526316	0.411765	0.5	0.0952381	7.82353	0.190476	0	6	0	0	T	TGME49_258820	302	43	57	14	93	0.0227273	0.12069	0.0666667	0.0106383	5.31034	0.159574	3.57e-08
TGME49_260240:529	0	8	1	0	T	TGME49_260240	529	13	20	7	12	0.0714286	0.428571	0.25	0.0769231	6	0.307692	0	12	0	0	T	TGME49_260240	529	40	22	45	26	0.0243902	0.565217	0.0217391	0.037037	23.1739	1.7037	2.13e-11
TGME49_260620:1420	0	5	5	1	T	TGME49_260620	1420	17	24	12	25	0.0555556	0.24	0.461539	0.0769231	4.32	0.166667	0	8	0	0	T	TGME49_260620	1420	47	19	3	31	0.0208333	0.45	0.25	0.03125	21.6	0.125	4.44e-08
TGME49_261780:377	0	6	3	0	T	TGME49_261780	377	33	38	14	14	0.0294118	0.179487	0.266667	0.0666667	6.10256	0.25	0	22	110	1	T	TGME49_261780	377	76	63	163	87	0.012987	0.359375	0.676829	0.0227273	27.6719	0.033579	2.28e-13
TGME49_262050:1176	0	12	0	3	T	TGME49_262050	1176	75	60	4	56	0.0131579	0.213115	0.2	0.0701754	16.1967	0.350877	0	15	0	0	T	TGME49_262050	1176	29	66	109	36	0.0333333	0.238806	0.00909091	0.027027	7.16418	2.97297	6.68e-07
TGME49_262050:165	0	12	0	0	T	TGME49_262050	165	83	81	16	35	0.0119048	0.158537	0.0588235	0.0277778	13.3171	0.472222	0	10	0	0	T	TGME49_262050	165	82	61	23	60	0.0120482	0.177419	0.0416667	0.0163934	14.7258	0.393443	1.13e-07
TGME49_262050:2227	0	9	0	1	T	TGME49_262050	2227	36	70	15	51	0.027027	0.140845	0.0625	0.0384615	5.21127	0.615385	2	11	0	0	T	TGME49_262050	2227	84	67	16	33	0.0352941	0.176471	0.0588235	0.0294118	5	0.5	2.69e-05
TGME49_262050:2630	0	6	6	0	T	TGME49_262050	2630	31	28	15	21	0.03125	0.241379	0.4375	0.0454546	7.72414	0.103896	0	7	0	0	T	TGME49_262050	2630	43	43	48	32	0.0227273	0.181818	0.0204082	0.030303	8	1.48485	2.21e-05
TGME49_262500:392	0	6	0	0	T	TGME49_262500	392	7	14	9	20	0.125	0.466667	0.1	0.0476191	3.73333	0.476191	0	7	0	0	T	TGME49_262500	392	39	58	31	60	0.025	0.135593	0.03125	0.0163934	5.42373	0.52459	1.21e-07
TGME49_262620:1867	0	8	1	0	T	TGME49_262620	1867	89	50	13	43	0.0111111	0.176471	0.142857	0.0227273	15.8824	0.159091	0	6	0	0	T	TGME49_262620	1867	48	42	9	35	0.0204082	0.162791	0.1	0.0277778	7.97674	0.277778	2.56e-06
TGME49_262620:2018	0	10	3	0	T	TGME49_262620	2018	24	54	15	38	0.04	0.2	0.25	0.025641	5	0.102564	0	9	0	0	T	TGME49_262620	2018	53	39	1	26	0.0185185	0.25	0.5	0.037037	13.5	0.0740741	4.45e-07
TGME49_262730:1865	0	5	0	0	T	TGME49_262730	1865	32	15	4	15	0.030303	0.375	0.2	0.0625	12.375	0.3125	0	12	0	2	T	TGME49_262730	1865	158	51	50	46	0.00628931	0.25	0.0196078	0.0638298	39.75	3.25532	3.12e-06
TGME49_263090:1343	0	16	0	8	T	TGME49_263090	1343	200	83	37	111	0.00497512	0.202381	0.0263158	0.0803571	40.6786	3.05357	5	62	31	1	T	TGME49_263090	1343	292	289	99	117	0.0204778	0.217241	0.32	0.0169492	10.6086	0.0529661	1.5e-13
TGME49_263320:1294	0	7	1	1	T	TGME49_263320	1294	34	36	5	32	0.0285714	0.216216	0.333333	0.0606061	7.56757	0.181818	0	8	0	0	T	TGME49_263320	1294	21	44	7	34	0.0454545	0.2	0.125	0.0285714	4.4	0.228571	1.81e-05
TGME49_263320:1613	0	9	0	1	T	TGME49_263320	1613	37	34	2	31	0.0263158	0.285714	0.333333	0.0625	10.8571	0.1875	0	10	0	0	T	TGME49_263320	1613	51	34	35	46	0.0192308	0.314286	0.0277778	0.0212766	16.3429	0.765957	3.4e-10
TGME49_265790:1413	0	5	0	1	T	TGME49_265790	1413	60	27	18	22	0.0163934	0.214286	0.0526316	0.0869565	13.0714	1.65217	0	11	0	3	T	TGME49_265790	1413	43	74	78	120	0.0227273	0.16	0.0126582	0.0330579	7.04	2.61157	5.52e-07
TGME49_265790:1607	0	5	6	0	T	TGME49_265790	1607	32	22	15	38	0.030303	0.26087	0.4375	0.025641	8.6087	0.0586081	0	15	0	0	T	TGME49_265790	1607	176	105	44	170	0.00564972	0.150943	0.0222222	0.00584795	26.717	0.263158	3.32e-16
TGME49_265790:2483	0	5	0	0	T	TGME49_265790	2483	33	23	11	47	0.0294118	0.25	0.0833333	0.0208333	8.5	0.25	0	15	0	0	T	TGME49_265790	2483	73	71	17	49	0.0135135	0.222222	0.0555556	0.02	16.4444	0.36	1.06e-10
TGME49_266080:2129	0	8	11	0	T	TGME49_266080	2129	49	50	47	47	0.02	0.176471	0.25	0.0208333	8.82353	0.0833333	1	30	0	0	T	TGME49_266080	2129	196	212	74	113	0.0101523	0.14554	0.0133333	0.00877193	14.3357	0.657895	1.29e-11
TGME49_266120:901	0	7	0	0	T	TGME49_266120	901	19	19	13	14	0.05	0.4	0.0714286	0.0666667	8	0.933333	0	8	0	0	T	TGME49_266120	901	18	10	1	27	0.0526316	0.818182	0.5	0.0357143	15.5455	0.0714286	1.08e-13
TGME49_266640:982	0	5	2	0	T	TGME49_266640	982	28	31	15	23	0.0344828	0.1875	0.1875	0.0416667	5.4375	0.222222	0	5	0	0	T	TGME49_266640	982	68	16	13	57	0.0144928	0.352941	0.0714286	0.0172414	24.3529	0.241379	4.88e-09
TGME49_266960:3200	0	14	4	5	T	TGME49_266960	3200	122	88	61	125	0.00813008	0.168539	0.0806452	0.0476191	20.7303	0.590476	3	12	0	0	T	TGME49_266960	3200	61	42	33	13	0.0645161	0.302326	0.0294118	0.0714286	4.68605	2.42857	1.87e-08
TGME49_268790:1121	1	7	5	1	T	TGME49_268790	1121	38	22	16	20	0.0512821	0.347826	0.352941	0.0952381	6.78261	0.269841	0	8	21	0	T	TGME49_268790	1121	51	64	22	32	0.0192308	0.138462	0.956522	0.030303	7.2	0.0316804	0.000562582
TGME49_268980:1542	0	6	8	1	T	TGME49_268980	1542	26	28	21	24	0.037037	0.241379	0.409091	0.08	6.51724	0.195556	0	9	0	0	T	TGME49_268980	1542	65	57	88	34	0.0151515	0.172414	0.011236	0.0285714	11.3793	2.54286	0.00017275
TGME49_268980:924	0	9	0	0	T	TGME49_268980	924	33	48	23	18	0.0294118	0.204082	0.0416667	0.0526316	6.93878	1.26316	0	23	0	0	T	TGME49_268980	924	72	52	1	22	0.0136986	0.45283	0.5	0.0434783	33.0566	0.0869565	2e-07
TGME49_269010:3725	0	10	0	0	T	TGME49_269010	3725	16	37	4	28	0.0588235	0.289474	0.2	0.0344828	4.92105	0.172414	1	6	0	0	T	TGME49_269010	3725	65	33	72	31	0.030303	0.205882	0.0136986	0.03125	6.79412	2.28125	2.24e-07
TGME49_269010:3989	0	5	0	0	T	TGME49_269010	3989	99	37	28	23	0.01	0.157895	0.0344828	0.0416667	15.7895	1.20833	2	11	21	0	T	TGME49_269010	3989	84	69	93	63	0.0352941	0.171429	0.234043	0.015625	4.85714	0.0667614	7.74e-07
TGME49_269010:697	0	6	0	2	T	TGME49_269010	697	29	27	18	28	0.0333333	0.25	0.0526316	0.103448	7.5	1.96552	0	23	0	0	T	TGME49_269010	697	109	55	39	63	0.00909091	0.428571	0.025	0.015625	47.1429	0.625	7.21e-15
TGME49_269950:4410	0	5	0	0	T	TGME49_269950	4410	50	32	6	16	0.0196078	0.181818	0.142857	0.0588235	9.27273	0.411765	0	22	0	0	T	TGME49_269950	4410	82	56	41	10	0.0120482	0.403509	0.0238095	0.0909091	33.4912	3.81818	7.28e-05
TGME49_269980:1232	0	5	0	0	T	TGME49_269980	1232	47	19	10	18	0.0208333	0.3	0.0909091	0.0526316	14.4	0.578947	0	7	0	0	T	TGME49_269980	1232	63	20	22	21	0.015625	0.380952	0.0434783	0.0454545	24.381	1.04545	5.91e-07
TGME49_270320:187	0	5	0	1	T	TGME49_270320	187	88	34	6	37	0.011236	0.171429	0.142857	0.0526316	15.2571	0.368421	0	8	40	0	T	TGME49_270320	187	55	62	42	78	0.0178571	0.142857	0.953488	0.0126582	8	0.0132757	1.03e-06
TGME49_270320:48	0	5	0	0	T	TGME49_270320	48	50	37	4	24	0.0196078	0.157895	0.2	0.04	8.05263	0.2	0	7	30	0	T	TGME49_270320	48	69	60	47	51	0.0142857	0.131148	0.645833	0.0192308	9.18033	0.0297767	5e-05
TGME49_273760:2533	0	20	0	1	T	TGME49_273760	2533	133	141	48	83	0.00746269	0.147887	0.0204082	0.0238095	19.8169	1.16667	0	16	0	9	T	TGME49_273760	2533	167	136	48	199	0.00595238	0.124088	0.0204082	0.05	20.8467	2.45	4.82e-08
TGME49_273760:2741	4	14	0	0	T	TGME49_273760	2741	51	40	12	23	0.0961538	0.365854	0.0769231	0.0416667	3.80488	0.541667	0	9	0	0	T	TGME49_273760	2741	64	48	5	18	0.0153846	0.204082	0.166667	0.0526316	13.2653	0.315789	4.03e-06
TGME49_274060:1811	0	7	7	0	T	TGME49_274060	1811	21	30	23	24	0.0454546	0.258064	0.333333	0.04	5.67742	0.12	0	7	0	0	T	TGME49_274060	1811	28	17	1	17	0.0344828	0.444444	0.5	0.0555556	12.8889	0.111111	5.05e-07
TGME49_275460:1867	0	7	0	1	T	TGME49_275460	1867	24	36	13	31	0.04	0.216216	0.0714286	0.0625	5.40541	0.875	0	9	0	0	T	TGME49_275460	1867	79	52	45	16	0.0125	0.188679	0.0217391	0.0588235	15.0943	2.70588	0.000917353
TGME49_277080:311	6	69	4	66	T	TGME49_277080	311	398	371	140	643	0.0175439	0.188172	0.035461	0.104037	10.7258	2.93385	14	46	0	0	T	TGME49_277080	311	147	95	16	32	0.101351	0.489583	0.0588235	0.030303	4.83056	0.515152	4.8e-23
TGME49_277260:128	0	69	11	49	T	TGME49_277260	128	258	295	216	453	0.003861	0.236486	0.0552995	0.110132	61.25	1.99156	63	265	46	138	T	TGME49_277260	128	2138	1374	972	1295	0.0299205	0.193455	0.0483042	0.107253	6.46561	2.22037	9.1e-26
TGME49_277840:1793	0	5	0	0	T	TGME49_277840	1793	27	22	1	14	0.0357143	0.26087	0.5	0.0666667	7.30435	0.133333	0	12	0	0	T	TGME49_277840	1793	28	37	32	39	0.0344828	0.342105	0.030303	0.025	9.92105	0.825	1.5e-08
TGME49_280370:299	0	8	1	0	T	TGME49_280370	299	33	43	24	43	0.0294118	0.204545	0.08	0.0227273	6.95455	0.284091	0	6	0	0	T	TGME49_280370	299	53	39	1	63	0.0185185	0.175	0.5	0.015625	9.45	0.03125	2.41e-09
TGME49_280380:1533	0	9	0	7	T	TGME49_280380	1533	37	58	19	75	0.0263158	0.169491	0.05	0.105263	6.44068	2.10526	0	23	12	1	T	TGME49_280380	1533	62	124	15	93	0.015873	0.192	0.8125	0.0212766	12.096	0.0261866	5.72e-07
TGME49_283540:1437	0	10	0	4	T	TGME49_283540	1437	23	55	15	41	0.0416667	0.196429	0.0625	0.119048	4.71429	1.90476	0	34	51	2	T	TGME49_283540	1437	21	69	85	38	0.0454545	0.5	0.604651	0.0769231	11	0.127219	8.26e-09
TGME49_283540:1949	0	9	4	0	T	TGME49_283540	1949	43	52	29	34	0.0227273	0.188679	0.166667	0.0285714	8.30189	0.171429	0	7	19	0	T	TGME49_283540	1949	120	56	23	115	0.00826446	0.140351	0.833333	0.00862069	16.9825	0.0103448	4.21e-11
TGME49_283780:491	0	5	0	0	T	TGME49_283780	491	17	24	1	36	0.0555556	0.24	0.5	0.027027	4.32	0.054054	0	5	0	0	T	TGME49_283780	491	52	28	74	42	0.0188679	0.206897	0.0133333	0.0232558	10.9655	1.74419	5.82e-08
TGME49_283850:1578	0	5	0	1	T	TGME49_283850	1578	50	35	4	55	0.0196078	0.166667	0.2	0.0357143	8.5	0.178571	0	16	0	0	T	TGME49_283850	1578	91	120	3	20	0.0108696	0.140496	0.25	0.047619	12.9256	0.190476	0.000231004
TGME49_283850:2108	0	8	0	0	T	TGME49_283850	2108	15	33	3	29	0.0625	0.264706	0.25	0.0333333	4.23529	0.133333	0	12	0	0	T	TGME49_283850	2108	52	48	61	21	0.0188679	0.265306	0.016129	0.0454545	14.0612	2.81818	6.95e-07
TGME49_284180:465	0	5	0	0	T	TGME49_284180	465	58	22	1	8	0.0169491	0.26087	0.5	0.111111	15.3913	0.222222	0	5	0	0	T	TGME49_284180	465	56	12	23	10	0.0175439	0.461538	0.0416667	0.0909091	26.3077	2.18182	0.00189314
TGME49_284180:498	0	6	0	0	T	TGME49_284180	498	10	19	7	8	0.0909091	0.35	0.125	0.111111	3.85	0.888889	0	11	0	0	T	TGME49_284180	498	51	15	4	38	0.0192308	0.75	0.2	0.025641	39	0.128205	1.42e-14
TGME49_285980:1070	0	13	0	0	T	TGME49_285980	1070	65	57	8	35	0.0151515	0.241379	0.111111	0.0277778	15.931	0.25	0	5	0	0	T	TGME49_285980	1070	23	12	17	22	0.0416667	0.461538	0.0555556	0.0434783	11.0769	0.782609	3.29e-08
TGME49_285980:1709	0	13	0	1	T	TGME49_285980	1709	21	71	11	45	0.0454546	0.194444	0.0833333	0.0434783	4.27778	0.521739	0	9	0	0	T	TGME49_285980	1709	31	54	99	9	0.03125	0.181818	0.01	0.1	5.81818	10	0.000361542
TGME49_286090:690	0	9	2	0	T	TGME49_286090	690	77	67	32	76	0.0128205	0.147059	0.0909091	0.012987	11.4706	0.142857	0	9	0	0	T	TGME49_286090	690	73	57	19	69	0.0135135	0.172414	0.05	0.0142857	12.7586	0.285714	1.33e-10
TGME49_286420:1539	0	13	0	4	T	TGME49_286420	1539	160	104	61	100	0.00621118	0.133333	0.016129	0.0495049	21.4667	3.06931	23	161	13	75	T	TGME49_286420	1539	623	711	260	651	0.0384615	0.227528	0.0536398	0.116564	5.91573	2.17309	3.56e-15
TGME49_286470:1385	0	7	0	4	T	TGME49_286470	1385	18	30	3	49	0.0526316	0.258064	0.25	0.1	4.90323	0.4	0	5	0	0	T	TGME49_286470	1385	39	45	39	62	0.025	0.130435	0.025	0.015873	5.21739	0.634921	3.8e-05
TGME49_286530:1070	0	8	2	3	T	TGME49_286530	1070	32	17	2	33	0.030303	0.5	1	0.117647	16.5	0.117647	0	10	0	0	T	TGME49_286530	1070	93	78	3	106	0.0106383	0.139241	0.25	0.00934579	13.0886	0.0373832	1.28e-09
TGME49_286630:1847	0	7	0	0	T	TGME49_286630	1847	39	21	6	37	0.025	0.363636	0.142857	0.0263158	14.5455	0.18421	0	14	0	8	T	TGME49_286630	1847	50	30	82	86	0.0196078	0.483871	0.0120482	0.103448	24.6774	8.58621	2.97e-18
TGME49_288360:2291	0	5	8	2	T	TGME49_288360	2291	57	32	45	44	0.0172414	0.181818	0.195652	0.0666667	10.5455	0.340741	0	13	0	0	T	TGME49_288360	2291	121	77	97	29	0.00819672	0.179487	0.0102041	0.0333333	21.8974	3.26667	0.00022425
TGME49_288360:3086	0	9	0	3	T	TGME49_288360	3086	39	38	8	45	0.025	0.25641	0.111111	0.0869565	10.2564	0.782609	0	10	0	0	T	TGME49_288360	3086	49	45	26	49	0.02	0.23913	0.037037	0.02	11.9565	0.54	9.57e-08
TGME49_288380:2706	0	8	5	4	T	TGME49_288380	2706	114	65	71	75	0.00869565	0.136364	0.0833333	0.0657895	15.6818	0.789474	5	22	0	0	T	TGME49_288380	2706	136	132	87	79	0.0437956	0.172932	0.0113636	0.0125	3.94862	1.1	2.44e-07
TGME49_288630:1319	0	7	0	0	T	TGME49_288630	1319	26	28	1	25	0.037037	0.275862	0.5	0.0384615	7.44828	0.0769231	0	11	0	0	T	TGME49_288630	1319	76	68	59	57	0.012987	0.173913	0.0166667	0.0172414	13.3913	1.03448	4.03e-08
TGME49_289600:318	0	24	0	1	T	TGME49_289600	318	43	75	14	63	0.0227273	0.328947	0.0666667	0.03125	14.4737	0.46875	0	26	13	0	T	TGME49_289600	318	91	144	100	23	0.0108696	0.186207	0.138614	0.0416667	17.131	0.300595	5.53e-09
TGME49_289620:1352	0	8	0	2	T	TGME49_289620	1352	42	44	13	41	0.0232558	0.2	0.0714286	0.0714286	8.6	1	0	18	17	10	T	TGME49_289620	1352	144	124	112	144	0.00689655	0.152	0.159292	0.0758621	22.04	0.476245	0.000160004
TGME49_289620:530	0	10	0	0	T	TGME49_289620	530	32	33	20	28	0.030303	0.323529	0.0476191	0.0344828	10.6765	0.724138	1	5	0	0	T	TGME49_289620	530	27	16	40	31	0.0714286	0.352941	0.0243902	0.03125	4.94118	1.28125	4.32e-10
TGME49_289630:1209	0	8	0	0	T	TGME49_289630	1209	30	29	27	23	0.0322581	0.3	0.0357143	0.0416667	9.3	1.16667	0	5	0	0	T	TGME49_289630	1209	30	25	1	21	0.0322581	0.230769	0.5	0.0454545	7.15385	0.0909091	5.46e-06
TGME49_289690:1112	0	13	2	0	T	TGME49_289690	1112	37	62	35	47	0.0263158	0.222222	0.0833333	0.0208333	8.44444	0.25	10	82	0	21	T	TGME49_289690	1112	173	221	77	193	0.0632184	0.373874	0.0128205	0.113402	5.914	8.84536	1.31e-19
TGME49_289750:864	0	5	0	1	T	TGME49_289750	864	30	48	24	67	0.0322581	0.122449	0.04	0.0294118	3.79592	0.735294	0	10	0	2	T	TGME49_289750	864	136	74	14	41	0.00729927	0.146667	0.0666667	0.0714286	20.0933	1.07143	0.000486163
TGME49_289920:1207	0	5	0	0	T	TGME49_289920	1207	27	27	26	22	0.0357143	0.214286	0.037037	0.0434783	6	1.17391	0	5	0	0	T	TGME49_289920	1207	65	21	14	18	0.0151515	0.272727	0.0666667	0.0526316	18	0.789474	8.74e-05
TGME49_290670:2989	0	5	0	1	T	TGME49_290670	2989	22	14	5	24	0.0434783	0.4	0.166667	0.08	9.2	0.48	0	10	0	0	T	TGME49_290670	2989	38	61	56	35	0.025641	0.177419	0.0175439	0.0277778	6.91935	1.58333	3.02e-05
TGME49_290700:2485	0	5	0	2	T	TGME49_290700	2485	52	35	27	31	0.0188679	0.166667	0.0357143	0.09375	8.83333	2.625	8	21	25	0	T	TGME49_290700	2485	255	96	122	62	0.0351562	0.226804	0.211382	0.015873	6.45132	0.0750916	3.32e-07
TGME49_290700:2969	0	12	0	1	T	TGME49_290700	2969	31	52	32	45	0.03125	0.245283	0.030303	0.0434783	7.84906	1.43478	0	8	2	0	T	TGME49_290700	2969	92	53	2	20	0.0107527	0.166667	1	0.047619	15.5	0.047619	1.77e-05
TGME49_291890:2289	4	31	2	13	T	TGME49_291890	2289	142	147	101	163	0.034965	0.216216	0.0294118	0.0853658	6.18378	2.90244	1	20	2	3	T	TGME49_291890	2289	173	135	122	138	0.0114943	0.154412	0.0243902	0.028777	13.4338	1.17986	5.12e-11
TGME49_291960:1565	0	11	0	3	T	TGME49_291960	1565	37	37	13	41	0.0263158	0.31579	0.0714286	0.0952381	12	1.33333	0	5	0	0	T	TGME49_291960	1565	53	48	43	53	0.0185185	0.122449	0.0227273	0.0185185	6.61224	0.814815	5.91e-06
TGME49_291960:1691	0	12	0	2	T	TGME49_291960	1691	53	40	1	26	0.0185185	0.317073	0.5	0.111111	17.1219	0.222222	0	9	0	0	T	TGME49_291960	1691	105	46	96	54	0.00943396	0.212766	0.0103093	0.0181818	22.5532	1.76364	6.69e-08
TGME49_291960:2701	0	6	0	0	T	TGME49_291960	2701	141	56	14	22	0.00704225	0.122807	0.0666667	0.0434783	17.4386	0.652174	0	7	32	0	T	TGME49_291960	2701	69	60	73	54	0.0142857	0.131148	0.445946	0.0181818	9.18033	0.0407713	0.00011935
TGME49_291960:2908	0	6	0	1	T	TGME49_291960	2908	37	54	7	24	0.0263158	0.127273	0.125	0.08	4.83636	0.64	0	7	0	0	T	TGME49_291960	2908	43	44	1	20	0.0227273	0.177778	0.5	0.047619	7.82222	0.0952381	0.0147446
TGME49_292130:1430	0	10	3	5	T	TGME49_292130	1430	69	71	18	62	0.0142857	0.152778	0.210526	0.0952381	10.6944	0.452381	7	58	0	0	T	TGME49_292130	1430	444	370	194	203	0.0179775	0.15903	0.00512821	0.00490196	8.84602	0.955882	1.25e-13
TGME49_293180:1091	0	5	0	0	T	TGME49_293180	1091	24	27	19	13	0.04	0.214286	0.05	0.0714286	5.35714	1.42857	1	17	7	0	T	TGME49_293180	1091	58	65	7	69	0.0338983	0.272727	1	0.0142857	8.04545	0.0142857	1.85e-10
TGME49_293180:2123	0	5	0	0	T	TGME49_293180	2123	29	25	26	30	0.0333333	0.230769	0.037037	0.0322581	6.92308	0.870968	0	7	0	0	T	TGME49_293180	2123	64	59	55	81	0.0153846	0.133333	0.0178571	0.0121951	8.66667	0.682927	3.71e-08
TGME49_293180:2530	0	9	0	1	T	TGME49_293180	2530	30	64	14	51	0.0322581	0.153846	0.0666667	0.0384615	4.76923	0.576923	0	9	0	0	T	TGME49_293180	2530	47	65	1	27	0.0208333	0.151515	0.5	0.0357143	7.27273	0.0714286	0.000110735
TGME49_293180:946	0	6	0	1	T	TGME49_293180	946	36	32	11	20	0.027027	0.212121	0.0833333	0.0952381	7.84849	1.14286	0	11	0	1	T	TGME49_293180	946	55	66	14	27	0.0178571	0.179104	0.0666667	0.0714286	10.0299	1.07143	0.00755405
TGME49_293260:353	0	6	0	0	T	TGME49_293260	353	42	20	19	14	0.0232558	0.333333	0.05	0.0666667	14.3333	1.33333	0	9	0	0	T	TGME49_293260	353	15	40	64	31	0.0625	0.243902	0.0153846	0.03125	3.90244	2.03125	2.39e-06
TGME49_293690:1449	0	17	5	4	T	TGME49_293690	1449	125	115	42	84	0.00793651	0.155172	0.139535	0.0588235	19.5517	0.421569	11	18	0	0	T	TGME49_293690	1449	397	143	156	36	0.0301508	0.131944	0.00636943	0.027027	4.37616	4.24324	0.000158206
TGME49_293690:890	0	8	2	4	T	TGME49_293690	890	70	50	13	45	0.0140845	0.176471	0.214286	0.108696	12.5294	0.507246	36	94	54	15	T	TGME49_293690	890	531	326	299	348	0.0695489	0.29052	0.183333	0.0458453	4.1772	0.250065	8.18e-31
TGME49_294200:1505	0	10	0	3	T	TGME49_294200	1505	55	77	41	69	0.0178571	0.141026	0.0238095	0.0571429	7.89744	2.4	1	28	0	0	T	TGME49_294200	1505	286	205	140	187	0.00696864	0.140777	0.0070922	0.00531915	20.2015	0.75	9.12e-13
TGME49_294200:2108	0	13	0	2	T	TGME49_294200	2108	39	63	38	53	0.025	0.21875	0.025641	0.0555556	8.75	2.16667	0	41	34	0	T	TGME49_294200	2108	306	270	207	259	0.00325733	0.154982	0.168269	0.00384615	47.5793	0.0228571	1.99e-21
TGME49_294230:121	0	12	0	2	T	TGME49_294230	121	21	36	12	25	0.0454546	0.351351	0.0769231	0.115385	7.72973	1.5	18	35	3	0	T	TGME49_294230	121	373	104	89	72	0.0508021	0.342857	0.0444444	0.0136986	6.74887	0.308219	7.27e-15
TGME49_294230:226	0	7	0	0	T	TGME49_294230	226	32	62	7	41	0.030303	0.126984	0.125	0.0238095	4.19048	0.190476	1	10	0	0	T	TGME49_294230	226	57	64	12	18	0.0344828	0.169231	0.0769231	0.0526316	4.90769	0.684211	0.000193331
TGME49_294800:981	0	5	0	1	T	TGME49_294800	981	28	44	47	57	0.0344828	0.133333	0.0208333	0.0344828	3.86667	1.65517	1	25	0	4	T	TGME49_294800	981	95	128	137	71	0.0208333	0.20155	0.00724638	0.0694444	9.67442	9.58333	3.02e-06
TGME49_294870:4132	0	6	0	0	T	TGME49_294870	4132	25	18	3	16	0.0384615	0.368421	0.25	0.0588235	9.57895	0.235294	0	8	0	0	T	TGME49_294870	4132	68	55	60	36	0.0144928	0.160714	0.0163934	0.027027	11.0893	1.64865	1.55e-05
TGME49_295105:1377	0	6	0	0	T	TGME49_295105	1377	55	47	24	32	0.0178571	0.145833	0.04	0.030303	8.16667	0.757576	9	55	22	0	T	TGME49_295105	1377	173	257	93	187	0.0574713	0.217054	0.244681	0.00531915	3.77674	0.0217391	4.99e-22
TGME49_295105:930	0	8	0	0	T	TGME49_295105	930	66	51	24	39	0.0149254	0.173077	0.04	0.025	11.5961	0.625	8	41	0	2	T	TGME49_295105	930	322	209	168	133	0.0278638	0.2	0.00591716	0.0223881	7.17778	3.78358	2.1e-13
TGME49_295110:141	0	11	0	3	T	TGME49_295110	141	54	74	27	53	0.0181818	0.16	0.0357143	0.0740741	8.8	2.07407	8	14	17	9	T	TGME49_295110	141	255	100	141	115	0.0351562	0.148515	0.126761	0.0862069	4.22442	0.680077	0.00296112
TGME49_295110:1457	0	6	0	0	T	TGME49_295110	1457	45	44	7	44	0.0217391	0.155556	0.125	0.0222222	7.15556	0.177778	4	16	0	0	T	TGME49_295110	1457	237	120	120	123	0.0210084	0.140496	0.00826446	0.00806452	6.6876	0.975806	3.57e-11
TGME49_295110:522	0	20	2	2	T	TGME49_295110	522	153	138	66	104	0.00649351	0.151079	0.0447761	0.0285714	23.2662	0.638095	1	31	0	0	T	TGME49_295110	522	288	254	55	298	0.00692042	0.12549	0.0178571	0.00334448	18.1333	0.187291	8.64e-22
TGME49_295125:704	0	6	0	1	T	TGME49_295125	704	57	52	8	35	0.0172414	0.132076	0.111111	0.0555556	7.66038	0.5	4	12	0	0	T	TGME49_295125	704	194	103	122	101	0.025641	0.125	0.00813008	0.00980392	4.875	1.20588	9.65e-07
TGME49_295360:1608	0	6	0	0	T	TGME49_295360	1608	61	24	16	38	0.016129	0.28	0.0588235	0.025641	17.36	0.435897	1	22	42	0	T	TGME49_295360	1608	139	109	209	52	0.0142857	0.209091	0.204762	0.0188679	14.6364	0.0921457	5.76e-10
TGME49_295360:1626	0	6	1	3	T	TGME49_295360	1626	44	40	11	48	0.0222222	0.170732	0.166667	0.0816327	7.68293	0.489796	0	17	0	0	T	TGME49_295360	1626	103	121	89	124	0.00961539	0.147541	0.0111111	0.008	15.3443	0.72	1.31e-08
TGME49_297430:590	0	5	6	1	T	TGME49_297430	590	34	37	19	39	0.0285714	0.157895	0.35	0.05	5.52632	0.142857	0	8	16	0	T	TGME49_297430	590	52	54	28	49	0.0188679	0.163636	0.586207	0.02	8.67273	0.0341176	2.01e-05
TGME49_297880:2470	0	7	0	0	T	TGME49_297880	2470	22	43	19	27	0.0434783	0.181818	0.05	0.0357143	4.18182	0.714286	1	8	0	3	T	TGME49_297880	2470	79	58	26	49	0.025	0.152542	0.037037	0.08	6.10169	2.16	0.00234001
TGME49_299780:3179	0	5	2	0	T	TGME49_299780	3179	79	19	27	18	0.0125	0.3	0.107143	0.0526316	24	0.491228	0	8	0	0	T	TGME49_299780	3179	73	60	53	92	0.0135135	0.147541	0.0185185	0.0107527	10.918	0.580645	2.58e-09
TGME49_300040:1707	0	5	2	0	T	TGME49_300040	1707	45	19	4	18	0.0217391	0.3	0.6	0.0526316	13.8	0.0877193	0	8	0	0	T	TGME49_300040	1707	28	37	16	45	0.0344828	0.236842	0.0588235	0.0217391	6.86842	0.369565	5.92e-08
TGME49_301222:6284	0	30	4	18	T	TGME49_301222	6284	277	238	192	282	0.00359712	0.129707	0.0259067	0.0671378	36.0586	2.59152	13	54	1	2	T	TGME49_301222	6284	274	287	102	142	0.0509091	0.190972	0.0194175	0.020979	3.75124	1.08042	3.82e-13
TGME49_304500:2274	0	9	2	6	T	TGME49_304500	2274	64	34	14	72	0.0153846	0.285714	0.2	0.0958904	18.5714	0.479452	13	20	0	0	T	TGME49_304500	2274	148	54	101	22	0.0939597	0.381818	0.00980392	0.0434783	4.06364	4.43478	6.32e-10
TGME49_304740:2267	0	5	0	0	T	TGME49_304740	2267	29	27	20	19	0.0333333	0.214286	0.0476191	0.05	6.42857	1.05	0	5	0	0	T	TGME49_304740	2267	30	20	50	33	0.0322581	0.285714	0.0196078	0.0294118	8.85714	1.5	3.96e-06
TGME49_306190:3271	0	6	1	0	T	TGME49_306190	3271	29	22	8	9	0.0333333	0.304348	0.222222	0.1	9.13044	0.45	0	7	34	0	T	TGME49_306190	3271	39	40	64	54	0.025	0.195122	0.538462	0.0181818	7.80488	0.0337662	3.64e-07
TGME49_308020:1090	0	10	1	2	T	TGME49_308020	1090	66	56	31	93	0.0149254	0.192983	0.0625	0.0319149	12.9298	0.510638	5	31	0	7	T	TGME49_308020	1090	251	248	71	128	0.0238095	0.128514	0.0138889	0.0620155	5.39759	4.46512	2.69e-06
TGME49_308840:1535	0	16	0	0	T	TGME49_308840	1535	73	56	9	18	0.0135135	0.298246	0.1	0.0526316	22.0702	0.526316	6	26	40	0	T	TGME49_308840	1535	164	141	127	121	0.0424242	0.190141	0.320312	0.00819672	4.48189	0.0255898	3.35e-15
TGME49_308840:1635	0	24	0	6	T	TGME49_308840	1635	120	110	40	94	0.00826446	0.225225	0.0243902	0.0736842	27.2523	3.02105	0	36	0	0	T	TGME49_308840	1635	212	234	66	86	0.00469484	0.157447	0.0149254	0.0114943	33.5362	0.770115	4.76e-09
TGME49_308860:2525	0	7	0	0	T	TGME49_308860	2525	90	30	40	31	0.010989	0.258064	0.0243902	0.03125	23.4839	1.28125	0	7	0	0	T	TGME49_308860	2525	77	42	19	21	0.0128205	0.186047	0.05	0.0454545	14.5116	0.909091	1.31e-05
TGME49_309210:1501	0	11	0	1	T	TGME49_309210	1501	12	42	21	21	0.0769231	0.27907	0.0454546	0.0909091	3.62791	2	2	38	14	9	T	TGME49_309210	1501	113	149	25	88	0.0263158	0.26	0.576923	0.11236	9.88	0.194757	1.31e-05
TGME49_309590:2947	1	72	6	31	T	TGME49_309590	2947	196	366	107	278	0.0101523	0.19891	0.0648148	0.114695	19.5926	1.76958	0	41	2	0	T	TGME49_309590	2947	119	207	74	60	0.00833333	0.201923	0.04	0.0163934	24.2308	0.409836	8.77e-08
TGME49_309600:2476	0	6	0	1	T	TGME49_309600	2476	36	26	16	30	0.027027	0.259259	0.0588235	0.0645161	9.59259	1.09677	0	13	0	0	T	TGME49_309600	2476	33	57	8	44	0.0294118	0.241379	0.111111	0.0222222	8.2069	0.2	1.02e-07
TGME49_309760:1305	0	6	0	3	T	TGME49_309760	1305	34	39	6	43	0.0285714	0.175	0.142857	0.0909091	6.125	0.636364	0	9	0	0	T	TGME49_309760	1305	64	76	41	62	0.0153846	0.12987	0.0238095	0.015873	8.44156	0.666667	0.000326964
TGME49_309760:2581	0	5	0	1	T	TGME49_309760	2581	73	48	27	70	0.0135135	0.122449	0.0357143	0.028169	9.06122	0.788732	0	7	0	0	T	TGME49_309760	2581	98	56	9	62	0.010101	0.140351	0.1	0.015873	13.8947	0.15873	1.71e-06
TGME49_309760:920	0	5	0	1	T	TGME49_309760	920	50	41	7	36	0.0196078	0.142857	0.125	0.054054	7.28571	0.432432	1	9	0	0	T	TGME49_309760	920	82	60	36	51	0.0240964	0.163934	0.027027	0.0192308	6.80328	0.711538	3.45e-05
TGME49_309820:144	0	14	0	0	T	TGME49_309820	144	41	42	24	12	0.0238095	0.348837	0.04	0.0769231	14.6512	1.92308	0	17	15	0	T	TGME49_309820	144	71	131	61	75	0.0138889	0.136364	0.258065	0.0131579	9.81818	0.0509868	3.46e-08
TGME49_310040:957	0	5	0	0	T	TGME49_310040	957	47	23	3	29	0.0208333	0.25	0.25	0.0333333	12	0.133333	0	16	0	0	T	TGME49_310040	957	25	84	36	56	0.0384615	0.2	0.027027	0.0175439	5.2	0.649123	8.6e-09
TGME49_310640:1512	0	5	0	0	T	TGME49_310640	1512	20	18	18	39	0.0476191	0.31579	0.0526316	0.025	6.63158	0.475	3	28	0	0	T	TGME49_310640	1512	89	65	9	22	0.0444444	0.439394	0.1	0.0434783	9.88636	0.434783	3.74e-14
TGME49_310640:2253	0	5	0	0	T	TGME49_310640	2253	40	40	7	34	0.0243902	0.146342	0.125	0.0285714	6	0.228571	0	8	0	0	T	TGME49_310640	2253	32	66	31	71	0.030303	0.134328	0.03125	0.0138889	4.43284	0.444444	1.08e-06
TGME49_310790:1750	0	10	2	1	T	TGME49_310790	1750	30	43	37	80	0.0322581	0.25	0.0789474	0.0246914	7.75	0.312757	0	24	0	2	T	TGME49_310790	1750	119	117	61	46	0.00833333	0.211864	0.016129	0.0638298	25.4237	3.95745	5.93e-10
TGME49_311240:3068	0	5	0	0	T	TGME49_311240	3068	10	17	4	15	0.0909091	0.333333	0.2	0.0625	3.66667	0.3125	0	6	0	0	T	TGME49_311240	3068	28	42	12	24	0.0344828	0.162791	0.0769231	0.04	4.72093	0.52	0.000320022
TGME49_311720:131	0	12	0	0	T	TGME49_311720	131	70	25	5	26	0.0140845	0.5	0.166667	0.037037	35.5	0.222222	8	15	0	0	T	TGME49_311720	131	221	83	200	83	0.0405405	0.190476	0.00497512	0.0119048	4.69841	2.39286	2.41e-14
TGME49_311720:2683	0	9	0	2	T	TGME49_311720	2683	15	38	62	61	0.0625	0.25641	0.015873	0.0483871	4.10256	3.04839	0	8	0	0	T	TGME49_311720	2683	50	47	80	24	0.0196078	0.1875	0.0123457	0.04	9.5625	3.24	1.42e-06
TGME49_311840:328	0	5	0	0	T	TGME49_311840	328	14	19	3	15	0.0666667	0.3	0.25	0.0625	4.5	0.25	0	7	0	0	T	TGME49_311840	328	34	11	20	18	0.0285714	0.666667	0.047619	0.0526316	23.3333	1.10526	4.78e-08
TGME49_312090:643	0	11	0	0	T	TGME49_312090	643	44	62	28	38	0.0222222	0.190476	0.0344828	0.025641	8.57143	0.74359	0	22	0	0	T	TGME49_312090	643	155	117	56	127	0.00641026	0.194915	0.0175439	0.0078125	30.4068	0.445312	2.5e-15
TGME49_312600:169	0	7	11	3	T	TGME49_312600	169	30	30	15	47	0.0322581	0.258064	0.75	0.0833333	8	0.111111	0	9	15	0	T	TGME49_312600	169	167	82	177	95	0.00595238	0.120482	0.0898876	0.0104167	20.241	0.115885	7.68e-07
TGME49_312600:319	0	5	0	1	T	TGME49_312600	319	40	30	17	18	0.0243902	0.193548	0.0555556	0.105263	7.93548	1.89474	0	9	0	0	T	TGME49_312600	319	71	80	3	74	0.0138889	0.123457	0.25	0.0133333	8.88889	0.0533333	5.24e-05
TGME49_312600:741	0	5	0	2	T	TGME49_312600	741	45	39	4	65	0.0217391	0.15	0.2	0.0454546	6.9	0.227273	0	20	0	0	T	TGME49_312600	741	162	86	35	97	0.00613497	0.241379	0.0277778	0.0102041	39.3448	0.367347	1.71e-13
TGME49_313910:2305	0	8	0	0	T	TGME49_313910	2305	41	40	3	22	0.0238095	0.219512	0.25	0.0434783	9.21951	0.173913	0	8	0	0	T	TGME49_313910	2305	82	38	65	50	0.0120482	0.230769	0.0151515	0.0196078	19.1538	1.29412	6.63e-08
TGME49_313910:3440	0	6	0	1	T	TGME49_313910	3440	23	27	12	34	0.0416667	0.25	0.0769231	0.0571429	6	0.742857	0	17	0	0	T	TGME49_313910	3440	77	67	31	34	0.0128205	0.264706	0.03125	0.0285714	20.6471	0.914286	1.19e-07
TGME49_313910:4058	0	12	0	3	T	TGME49_313910	4058	103	53	4	35	0.00961539	0.240741	0.2	0.111111	25.037	0.555556	0	7	0	0	T	TGME49_313910	4058	22	29	85	12	0.0434783	0.266667	0.0116279	0.0769231	6.13333	6.61538	0.00232602
TGME49_313910:5530	0	8	0	5	T	TGME49_313910	5530	29	47	16	55	0.0333333	0.1875	0.0588235	0.107143	5.625	1.82143	0	6	0	0	T	TGME49_313910	5530	121	46	149	34	0.00819672	0.148936	0.00666667	0.0285714	18.1702	4.28571	0.00515603
TGME49_313910:5673	0	16	1	2	T	TGME49_313910	5673	53	70	32	53	0.0185185	0.239437	0.0606061	0.0555556	12.9296	0.916667	0	8	0	0	T	TGME49_313910	5673	41	74	107	39	0.0238095	0.12	0.00925926	0.025	5.04	2.7	9.7e-06
TGME49_314430:2962	0	6	0	0	T	TGME49_314430	2962	37	37	4	31	0.0263158	0.18421	0.2	0.03125	7	0.15625	0	6	0	0	T	TGME49_314430	2962	24	35	33	47	0.04	0.194444	0.0294118	0.0208333	4.86111	0.708333	6.67e-07
TGME49_315320:1689	0	6	0	0	T	TGME49_315320	1689	66	55	12	44	0.0149254	0.125	0.0769231	0.0222222	8.375	0.288889	0	23	0	0	T	TGME49_315320	1689	36	124	47	144	0.027027	0.192	0.0208333	0.00689655	7.104	0.331034	3.7e-15
TGME49_316250:2824	0	12	0	2	T	TGME49_316250	2824	37	27	9	25	0.0263158	0.464286	0.1	0.115385	17.6429	1.15385	0	10	0	0	T	TGME49_316250	2824	79	37	41	51	0.0125	0.289474	0.0238095	0.0192308	23.1579	0.807692	1.03e-11
TGME49_316310:1322	0	9	2	7	T	TGME49_316310	1322	97	80	101	120	0.0102041	0.123457	0.0294118	0.0661157	12.0988	2.24793	0	11	0	0	T	TGME49_316310	1322	48	45	28	95	0.0204082	0.26087	0.0344828	0.0104167	12.7826	0.302083	2.2e-09
TGME49_319340:1782	0	5	1	3	T	TGME49_319340	1782	44	22	15	51	0.0222222	0.26087	0.125	0.0769231	11.7391	0.615385	0	7	0	0	T	TGME49_319340	1782	88	49	16	45	0.011236	0.16	0.0588235	0.0217391	14.24	0.369565	2.7e-05
TGME49_319350:853	0	5	0	0	T	TGME49_319350	853	84	39	15	45	0.0117647	0.15	0.0625	0.0217391	12.75	0.347826	0	7	6	7	T	TGME49_319350	853	34	35	29	100	0.0285714	0.222222	0.233333	0.0792079	7.77778	0.339463	2.25e-05
TGME49_321520:348	0	5	2	1	T	TGME49_321520	348	46	44	16	29	0.0212766	0.133333	0.176471	0.0666667	6.26667	0.377778	0	15	0	1	T	TGME49_321520	348	176	70	52	111	0.00564972	0.225352	0.0188679	0.0178571	39.8873	0.946429	8.8e-10
TGME49_321530:2231	0	5	0	1	T	TGME49_321530	2231	47	45	5	33	0.0208333	0.130435	0.166667	0.0588235	6.26087	0.352941	0	9	0	0	T	TGME49_321530	2231	43	66	27	32	0.0227273	0.149254	0.0357143	0.030303	6.56716	0.848485	0.00162341
TGME49_321530:2283	0	14	0	1	T	TGME49_321530	2283	15	39	9	37	0.0625	0.375	0.1	0.0526316	6	0.526316	2	38	18	0	T	TGME49_321530	2283	140	136	19	138	0.0212766	0.284672	0.95	0.00719425	13.3796	0.00757289	1.19e-25
TGME49_323100:358	0	11	0	3	T	TGME49_323100	358	78	61	14	61	0.0126582	0.193548	0.0666667	0.0645161	15.2903	0.967742	0	20	0	3	T	TGME49_323100	358	35	69	2	35	0.0277778	0.3	0.333333	0.111111	10.8	0.333333	4.81e-06
TGME49_328700:58	0	5	0	0	T	TGME49_328700	58	20	21	5	20	0.0476191	0.272727	0.166667	0.0476191	5.72727	0.285714	1	11	0	0	T	TGME49_328700	58	46	47	44	25	0.0425532	0.25	0.0222222	0.0384615	5.875	1.73077	5.72e-06
TGME49_462910:347	0	8	5	1	T	TGME49_462910	347	33	53	31	35	0.0294118	0.166667	0.1875	0.0555556	5.66667	0.296296	3	16	0	0	T	TGME49_462910	347	135	108	2	42	0.0294118	0.155963	0.333333	0.0232558	5.30275	0.0697674	5.79e-05

## Sheet: brady_PUS1_mrna_psis
full	wt_noCMC.x	wt_CMC.x	mut_noCMC.x	mut_CMC.x	nt.x	transcript.x	pos.x	wt_noCMC_depth.x	wt_CMC_depth.x	mut_noCMC_depth.x	mut_CMC_depth.x	wt_noCMC_pen.x	wt_CMC_pen.x	mut_noCMC_pen.x	mut_CMC_pen.x	wt_pen_ratio.x	mut_pen_ratio.x	wt_noCMC.y	wt_CMC.y	mut_noCMC.y	mut_CMC.y	nt.y	transcript.y	pos.y	wt_noCMC_depth.y	wt_CMC_depth.y	mut_noCMC_depth.y	mut_CMC_depth.y	wt_noCMC_pen.y	wt_CMC_pen.y	mut_noCMC_pen.y	mut_CMC_pen.y	wt_pen_ratio.y	mut_pen_ratio.y	binom
ENST00000223357:3003	0	10	1	0	T	ENST00000223357	3003	23	19	20	56	0.0416667	0.55	0.0952381	0.0175439	13.2	0.184211	1	5	3	3	T	ENST00000223357	3003	31	23	40	36	0.0625	0.25	0.097561	0.108108	4	1.10811	5.08e-14
ENST00000300527:2242	8	5	0	33	T	ENST00000300527	2242	121	19	33	380	0.0737705	0.3	0.0294118	0.0892388	4.06667	3.03412	0	20	4	15	T	ENST00000300527	2242	58	120	60	192	0.0169492	0.173554	0.0819672	0.0829016	10.2397	1.0114	5.3e-11
ENST00000309311:1951	23	18	5	0	T	ENST00000309311	1951	278	58	106	19	0.0860215	0.322034	0.0560748	0.05	3.74364	0.891667	1	51	14	39	T	ENST00000309311	1951	203	317	282	575	0.00980392	0.163522	0.0530035	0.0694444	16.6792	1.31019	6.16e-17
ENST00000325110:479	0	10	0	0	T	ENST00000325110	479	72	10	10	248	0.0136986	1	0.0909091	0.00401606	73	0.0441767	1	5	0	2	T	ENST00000325110	479	51	36	54	50	0.0384615	0.162162	0.0181818	0.0588235	4.21622	3.23529	8.82e-48
ENST00000331789:1093	0	17	10	0	T	ENST00000331789	1093	175	87	102	547	0.00568182	0.204545	0.106796	0.00182482	36	0.0170869	10	63	10	55	T	ENST00000331789	1093	282	398	294	587	0.0388693	0.160401	0.0372881	0.0952381	4.12668	2.55411	8.58e-34
ENST00000335181:1072	0	6	1	0	T	ENST00000335181	1072	29	14	11	77	0.0333333	0.466667	0.166667	0.0128205	14	0.0769231	0	7	2	3	T	ENST00000335181	1072	31	57	23	43	0.03125	0.137931	0.125	0.0909091	4.41379	0.727273	1.02e-07
ENST00000340923:778	0	5	1	0	T	ENST00000340923	778	13	9	4	111	0.0714286	0.6	0.4	0.00892857	8.4	0.0223214	0	5	3	3	T	ENST00000340923	778	25	24	25	36	0.0384615	0.24	0.153846	0.108108	6.24	0.702703	4.01e-19
ENST00000371554:1758	0	7	2	0	T	ENST00000371554	1758	45	25	21	22	0.0217391	0.307692	0.136364	0.0434783	14.1538	0.318841	1	18	3	14	T	ENST00000371554	1758	113	139	93	187	0.0175439	0.135714	0.0425532	0.0797872	7.73571	1.875	0.00012958
ENST00000396953:20	0	5	3	4	T	ENST00000396953	20	58	16	39	80	0.0169492	0.352941	0.1	0.0617284	20.8235	0.617284	1	9	1	8	T	ENST00000396953	20	58	57	47	90	0.0338983	0.172414	0.0416667	0.0989011	5.08621	2.37363	7.15e-06
ENST00000409809:6122	0	5	0	0	T	ENST00000409809	6122	24	8	11	111	0.04	0.666667	0.0833333	0.00892857	16.6667	0.107143	0	6	0	1	T	ENST00000409809	6122	41	19	17	16	0.0238095	0.35	0.0555556	0.117647	14.7	2.11765	1.22e-27
ENST00000433297:479	0	7	1	0	T	ENST00000433297	479	54	7	9	217	0.0181818	1	0.2	0.00458716	55	0.0229358	0	6	1	2	T	ENST00000433297	479	39	46	50	52	0.025	0.148936	0.0392157	0.0566038	5.95745	1.4434	5.18e-30
ENST00000445463:32	0	8	0	0	T	ENST00000445463	32	103	13	20	250	0.00961539	0.642857	0.047619	0.00398406	66.8571	0.0836653	0	7	1	5	T	ENST00000445463	32	73	61	31	80	0.0135135	0.129032	0.0625	0.0740741	9.54839	1.18519	1.22e-25
ENST00000519030:539	0	5	0	0	T	ENST00000519030	539	10	7	5	21	0.0909091	0.75	0.166667	0.0454545	8.25	0.272727	0	6	4	2	T	ENST00000519030	539	28	39	41	26	0.0344828	0.175	0.119048	0.111111	5.075	0.933333	0.000323508
ENST00000532702:443	0	6	0	0	T	ENST00000532702	443	41	26	19	69	0.0238095	0.259259	0.05	0.0142857	10.8889	0.285714	2	13	2	6	T	ENST00000532702	443	117	94	115	100	0.0254237	0.147368	0.0258621	0.0693069	5.79649	2.67987	3.6e-07
ENST00000535623:156	0	5	0	0	T	ENST00000535623	156	12	9	2	79	0.0769231	0.6	0.333333	0.0125	7.8	0.0375	0	5	1	1	T	ENST00000535623	156	20	23	27	30	0.047619	0.25	0.0714286	0.0645161	5.25	0.903226	9.26e-17
ENST00000540430:560	3	5	1	0	T	ENST00000540430	560	18	7	6	60	0.210526	0.75	0.285714	0.0163934	3.5625	0.057377	0	5	0	2	T	ENST00000540430	560	28	38	29	63	0.0344828	0.153846	0.0333333	0.046875	4.46154	1.40625	2.44e-11
ENST00000542220:493	0	6	0	0	T	ENST00000542220	493	49	13	22	47	0.02	0.5	0.0434783	0.0208333	25	0.479167	0	5	1	4	T	ENST00000542220	493	26	37	29	50	0.037037	0.157895	0.0666667	0.0980392	4.26316	1.47059	8.75e-07
ENST00000591051:1918	0	11	1	0	T	ENST00000591051	1918	15	11	6	119	0.0625	1	0.285714	0.00833333	16	0.0291667	0	7	0	3	T	ENST00000591051	1918	28	40	22	48	0.0344828	0.195122	0.0434783	0.0816327	5.65854	1.87755	3.42e-27
TGME49_200385:952	0	15	0	0	T	TGME49_200385	952	18	20	4	703	0.0526316	0.761905	0.2	0.00142045	14.4762	0.00710227	0	6	0	2	T	TGME49_200385	952	16	30	13	46	0.0588235	0.225806	0.0714286	0.0638298	3.83871	0.893617	9.47e-173
TGME49_201390:761	0	7	5	0	T	TGME49_201390	761	87	9	32	83	0.0113636	0.8	0.181818	0.0119048	70.4	0.0654762	3	17	8	17	T	TGME49_201390	761	110	124	221	255	0.036036	0.144	0.0405405	0.0703125	3.996	1.73438	9.89e-13
TGME49_203030:1313	0	6	0	0	T	TGME49_203030	1313	23	42	8	31	0.0416667	0.162791	0.111111	0.03125	3.90698	0.28125	0	10	0	4	T	TGME49_203030	1313	45	88	20	105	0.0217391	0.123596	0.047619	0.0471698	5.68539	0.990566	0.000115861
TGME49_208030:304	0	13	2	0	T	TGME49_208030	304	97	21	49	224	0.0102041	0.636364	0.06	0.00444444	62.3636	0.0740741	3	24	10	26	T	TGME49_208030	304	127	200	244	502	0.03125	0.124378	0.044898	0.0536779	3.9801	1.19555	6.12e-29
TGME49_209030:1132	0	15	6	0	T	TGME49_209030	1132	306	48	156	877	0.00325733	0.326531	0.044586	0.00113895	100.245	0.0255451	3	48	18	50	T	TGME49_209030	1132	252	378	372	696	0.0158103	0.129288	0.0509383	0.0731707	8.17744	1.43646	5.57e-53
TGME49_210370:1853	0	19	4	0	T	TGME49_210370	1853	23	37	21	408	0.0416667	0.526316	0.227273	0.00244499	12.6316	0.0107579	0	7	2	7	T	TGME49_210370	1853	29	38	32	77	0.0333333	0.205128	0.0909091	0.102564	6.15385	1.12821	3.2e-77
TGME49_211040:565	0	11	2	0	T	TGME49_211040	565	61	18	33	566	0.016129	0.631579	0.0882353	0.00176367	39.1579	0.0199882	2	40	7	31	T	TGME49_211040	565	89	337	89	422	0.0333333	0.121302	0.0888889	0.0756501	3.63905	0.851064	1.69e-32
TGME49_216860:1214	0	11	0	0	T	TGME49_216860	1214	72	11	23	191	0.0136986	1	0.0416667	0.00520833	73	0.125	1	30	3	11	T	TGME49_216860	1214	60	133	77	115	0.0327869	0.231343	0.0512821	0.103448	7.05597	2.01724	5.94e-30
TGME49_218820:122	0	12	1	1	T	TGME49_218820	122	43	23	35	402	0.0227273	0.541667	0.0555556	0.00496278	23.8333	0.08933	1	22	3	17	T	TGME49_218820	122	43	99	73	156	0.0454545	0.23	0.0540541	0.11465	5.06	2.12102	8.91e-54
TGME49_223050:1214	0	20	1	26	T	TGME49_223050	1214	117	53	34	1187	0.00847458	0.388889	0.0571429	0.0227273	45.8889	0.397727	6	49	3	24	T	TGME49_223050	1214	164	319	124	300	0.0424242	0.15625	0.032	0.0830565	3.68304	2.59551	1.66e-71
TGME49_223840:864	0	14	1	0	T	TGME49_223840	864	6	15	17	109	0.142857	0.9375	0.111111	0.00909091	6.5625	0.0818182	0	12	2	3	T	TGME49_223840	864	32	30	11	35	0.030303	0.419355	0.25	0.111111	13.8387	0.444444	1.52e-48
TGME49_230210:1449	0	8	2	0	T	TGME49_230210	1449	33	25	28	153	0.0294118	0.346154	0.103448	0.00649351	11.7692	0.0627706	0	15	0	5	T	TGME49_230210	1449	34	118	54	179	0.0285714	0.134454	0.0181818	0.0333333	4.70588	1.83333	4.77e-19
TGME49_231160:1001	0	19	0	0	T	TGME49_231160	1001	35	54	20	254	0.0277778	0.363636	0.047619	0.00392157	13.0909	0.0823529	1	6	1	4	T	TGME49_231160	1001	73	48	39	52	0.027027	0.142857	0.05	0.0943396	5.28571	1.88679	1.79e-31
TGME49_232130:1613	0	27	0	0	T	TGME49_232130	1613	37	27	9	11	0.0263158	1	0.1	0.0833333	38	0.833333	0	17	5	8	T	TGME49_232130	1613	48	75	41	85	0.0204082	0.236842	0.142857	0.104651	11.6053	0.732558	4.79e-14
TGME49_235470:2172	0	8	1	0	T	TGME49_235470	2172	22	32	23	432	0.0434783	0.272727	0.0833333	0.00230947	6.27273	0.0277136	0	23	2	18	T	TGME49_235470	2172	51	120	44	190	0.0192308	0.198347	0.0666667	0.0994764	10.314	1.49215	1.47e-38
TGME49_243460:4358	0	5	3	0	T	TGME49_243460	4358	97	17	15	369	0.0102041	0.333333	0.25	0.0027027	32.6667	0.0108108	0	5	0	0	T	TGME49_243460	4358	27	29	10	26	0.0357143	0.2	0.0909091	0.037037	5.6	0.407407	8.92e-43
TGME49_244560:1254	0	12	1	0	T	TGME49_244560	1254	37	13	41	165	0.0263158	0.928571	0.047619	0.0060241	35.2857	0.126506	3	21	3	19	T	TGME49_244560	1254	89	128	71	198	0.0444444	0.170543	0.0555556	0.100503	3.83721	1.80905	4.1e-21
TGME49_247520:1999	0	8	0	0	T	TGME49_247520	1999	85	26	40	177	0.0116279	0.333333	0.0243902	0.00561798	28.6667	0.230337	1	20	1	22	T	TGME49_247520	1999	115	143	98	294	0.0172414	0.145833	0.020202	0.0779661	8.45833	3.85932	1.45e-15
TGME49_249180:2278	0	13	0	0	T	TGME49_249180	2278	6	15	37	60	0.142857	0.875	0.0263158	0.0163934	6.125	0.622951	0	7	6	2	T	TGME49_249180	2278	27	43	92	89	0.0357143	0.181818	0.0752688	0.0333333	5.09091	0.442857	1.36e-24
TGME49_249250:314	0	10	1	0	T	TGME49_249250	314	167	61	42	552	0.00595238	0.177419	0.0465116	0.00180832	29.8065	0.0388788	9	49	5	29	T	TGME49_249250	314	289	319	244	294	0.0344828	0.15625	0.0244898	0.101695	4.53125	4.15254	3.17e-30
TGME49_257680:452	0	14	3	0	T	TGME49_257680	452	43	68	61	49	0.0227273	0.217391	0.0645161	0.02	9.56522	0.31	0	30	2	21	T	TGME49_257680	452	195	221	214	257	0.00510204	0.13964	0.0139535	0.0852713	27.3694	6.11111	6.25e-06
TGME49_258580:2510	0	10	1	0	T	TGME49_258580	2510	102	10	22	163	0.00970874	1	0.0869565	0.00609756	103	0.070122	0	5	0	0	T	TGME49_258580	2510	35	26	39	29	0.0277778	0.222222	0.025	0.0333333	8	1.33333	1.14e-45
TGME49_262640:94	0	13	6	0	T	TGME49_262640	94	93	66	14	146	0.0106383	0.208955	0.466667	0.00680272	19.6418	0.0145773	1	13	5	4	T	TGME49_262640	94	27	47	34	41	0.0714286	0.291667	0.171429	0.119048	4.08333	0.694444	2.46e-16
TGME49_276140:1066	0	9	0	0	T	TGME49_276140	1066	72	9	19	48	0.0136986	1	0.05	0.0204082	73	0.408163	1	10	6	3	T	TGME49_276140	1066	61	63	59	67	0.0322581	0.171875	0.116667	0.0588235	5.32812	0.504202	6.12e-12
TGME49_295105:356	0	6	0	19	T	TGME49_295105	356	24	24	42	205	0.04	0.28	0.0232558	0.0970874	7	4.17476	0	8	5	5	T	TGME49_295105	356	27	42	53	64	0.0357143	0.209302	0.111111	0.0923077	5.86047	0.830769	5.28e-08
TGME49_300280:258	0	9	1	0	T	TGME49_300280	258	52	9	15	58	0.0188679	1	0.125	0.0169492	53	0.135593	0	8	3	0	T	TGME49_300280	258	28	55	20	43	0.0344828	0.160714	0.190476	0.0227273	4.66071	0.119318	2.87e-14
TGME49_301400:3522	0	15	0	0	T	TGME49_301400	3522	22	20	6	455	0.0434783	0.761905	0.142857	0.00219298	17.5238	0.0153509	0	6	0	5	T	TGME49_301400	3522	39	51	38	72	0.025	0.134615	0.025641	0.0821918	5.38462	3.20548	2.47e-71
TGME49_305330:888	34	7	3	0	T	TGME49_305330	888	128	7	17	216	0.271318	1	0.222222	0.0046083	3.68571	0.0207373	0	12	0	4	T	TGME49_305330	888	61	86	43	61	0.016129	0.149425	0.0227273	0.0806452	9.26437	3.54839	3.55e-22
TGME49_309120:1834	0	15	2	0	T	TGME49_309120	1834	143	34	65	27	0.00694444	0.457143	0.0454545	0.0357143	65.8286	0.785714	10	26	11	14	T	TGME49_309120	1834	277	158	156	147	0.0395683	0.169811	0.0764331	0.101351	4.2916	1.32601	1.89e-06
TGME49_310780:989	0	15	0	0	T	TGME49_310780	989	49	44	37	505	0.02	0.355556	0.0263158	0.00197628	17.7778	0.0750988	0	9	4	9	T	TGME49_310780	989	93	69	148	107	0.0106383	0.142857	0.033557	0.0925926	13.4286	2.75926	8.71e-50
TGME49_311720:1294	0	13	1	0	T	TGME49_311720	1294	30	13	50	19	0.0322581	1	0.0392157	0.05	31	1.275	3	29	8	18	T	TGME49_311720	1294	146	188	96	199	0.0272109	0.15873	0.0927835	0.095	5.83333	1.02389	3.53e-07
TGME49_315320:1014	0	20	4	0	T	TGME49_315320	1014	61	47	24	447	0.016129	0.4375	0.2	0.00223214	27.125	0.0111607	1	18	1	14	T	TGME49_315320	1014	61	124	72	240	0.0322581	0.152	0.0273973	0.0622407	4.712	2.27178	1.42e-54
TGME49_325800:212	0	6	4	0	T	TGME49_325800	212	169	50	76	355	0.00588235	0.137255	0.0649351	0.00280899	23.3333	0.0432584	2	22	3	13	T	TGME49_325800	212	111	155	90	210	0.0267857	0.147436	0.043956	0.0663507	5.50427	1.50948	3.5e-21
